# Supplementary material for: The elusive reaction mechanism of Mn(ii)-mediated benzylic oxidation of alkylarene by H2O2: a gem-diol mechanism or a dual hydrogen abstraction mechanism?
Source: Royal Society of Chemistry journal article supplement (doi:10.1039/d3dt02943c), 2023-01-01
Supplement: d3dt02943c1.pdf [file d3dt02943c1.pdf]

## Electronic Supplementary Information for

The elusive reaction mechanism of Mn(II)-mediated benzylic oxidations of  
alkylarene by H<sub>2</sub>O<sub>2</sub>: A *gem*-diol one or a dual hydrogen abstraction one?

*Shoujun Wang,<sup>a,b</sup> Dongru Sun,<sup>\*a,b</sup> Zhimin Wu,<sup>a,b</sup> Yufen Zhao,<sup>a,b</sup> and Yong Wang<sup>\*a,b</sup>*

a. Institute of Drug Discovery Technology, Ningbo University, Ningbo 315211, Zhejiang, China

b. Qian Xuesen Collaborative Research Center of Astrochemistry and Space Life Sciences, Ningbo  
University, Ningbo 315211, Zhejiang, China

Email: [yong@nbu.edu.cn](mailto:yong@nbu.edu.cn), [sundongru@nbu.edu.cn](mailto:sundongru@nbu.edu.cn)

# Table of Contents

|          |                                                                                                                                                                                                                        |    |
|----------|------------------------------------------------------------------------------------------------------------------------------------------------------------------------------------------------------------------------|----|
| Part I   | Conversion of the $\text{Mn}^{\text{III}}\text{-OOH}$ species <b>1</b> to a $\text{Mn}^{\text{III}}$ -peracetate species <b>3</b> via a $\text{Mn}^{\text{IV}}(\text{O})(\text{AcO}^{\bullet})$ species <b>2</b> ..... | 3  |
| Part II  | Hydroxylation of PBA to 4-OH-PBA by the proximal and distal oxygen of the $\text{Mn}^{\text{III}}(\text{OOH})$ species <b>1</b> .....                                                                                  | 11 |
| Part III | Hydroxylation of PBA to 4-OH-PBA by the $\text{Mn}^{\text{IV}}(\text{O})(\text{AcO}^{\bullet})$ species <b>2</b> generated from the $\text{Mn}^{\text{III}}\text{-OOH}$ species <b>1</b> . ....                        | 26 |
| Part IV  | Alcohol oxidation of 4-OH-PBA by the $\text{Mn}^{\text{IV}}(\text{O})(\text{AcO}^{\bullet})$ species <b>2</b> via the <i>gem</i> -diol mechanism...38                                                                  |    |
| Part V   | Alcohol oxidation of 4-OH-PBA by the $\text{Mn}^{\text{IV}}(\text{O})(\text{AcO}^{\bullet})$ species <b>2</b> via the DHA and R-DHA mechanisms.....                                                                    | 52 |
| Part VI  | Cartesian coordinates .....                                                                                                                                                                                            | 69 |

## Part I Conversion of the Mn<sup>III</sup>-OOH species **1** to a Mn<sup>III</sup>-peracetate species **3** via a Mn<sup>IV</sup>(O)(AcO<sup>•</sup>) species **2**.

**Table S1.** Various SCF and Gibbs free energies of the conversion of the Mn<sup>III</sup>-OOH species **1** to a cyclic Mn<sup>III</sup>-peracetate complex **3** via the high-valent metal-oxo species **2**. Calculations were done at the UB3LYP-D3(BJ)/B2//B1 level in solvent.

|                              | OPT/B1+ZPE                | $\Delta E$  | SPE/B2+ZPE   | $\Delta E$  | $G$          | $\Delta G$  |
|------------------------------|---------------------------|-------------|--------------|-------------|--------------|-------------|
| <b>1</b>                     | -2763.302959 <sup>a</sup> | <b>37.1</b> | -2763.691505 | <b>36.3</b> | -2763.371872 | <b>38.2</b> |
| <b>3</b> <b>1</b>            | -2763.342761              | <b>12.1</b> | -2763.730944 | <b>11.5</b> | -2763.413376 | <b>12.2</b> |
| <b>5</b> <b>1</b>            | -2763.362020              | <b>0.0</b>  | -2763.749324 | <b>0.0</b>  | -2763.432784 | <b>0.0</b>  |
| <b>3</b> <b>TS</b> <b>12</b> | -2763.332883              | <b>18.3</b> | -2763.720383 | <b>18.2</b> | -2763.401743 | <b>19.5</b> |
| <b>5</b> <b>TS</b> <b>12</b> | -2763.321193              | <b>25.6</b> | -2763.708047 | <b>25.9</b> | -2763.392229 | <b>25.4</b> |
| <b>1</b> <b>2</b>            | -2763.330826              | <b>19.6</b> | -2763.723238 | <b>16.4</b> | -2763.401502 | <b>19.6</b> |
| <b>3</b> <b>2</b>            | -2763.357951              | <b>2.6</b>  | -2763.746994 | <b>1.5</b>  | -2763.429288 | <b>2.2</b>  |
| <b>5</b> <b>2</b>            | -2763.333140              | <b>18.1</b> | -2763.720721 | <b>17.9</b> | -2763.403385 | <b>18.4</b> |
| <b>3</b> <b>TS</b> <b>23</b> | -2763.337702              | <b>15.3</b> | -2763.726768 | <b>14.2</b> | -2763.408919 | <b>15.0</b> |
| <b>5</b> <b>TS</b> <b>23</b> | -2763.325909              | <b>22.7</b> | -2763.713561 | <b>22.4</b> | -2763.395741 | <b>23.2</b> |
| <b>1</b> <b>3</b>            | -2763.297441              | <b>40.5</b> | -2763.686947 | <b>39.1</b> | -2763.366835 | <b>41.4</b> |
| <b>3</b> <b>3</b>            | -2763.343361              | <b>11.7</b> | -2763.733197 | <b>10.1</b> | -2763.413418 | <b>12.2</b> |
| <b>5</b> <b>3</b>            | -2763.356164              | <b>3.7</b>  | -2763.744896 | <b>2.8</b>  | -2763.428282 | <b>2.8</b>  |

a. Absolute energies are in au units and the relative ones are in kcal mol<sup>-1</sup> units

Mn-O1 = 1.862/1.877  
Mn-O2 = 2.136/2.229  
O1-O3 = 1.447/1.438  
O3-H1 = 1.639/1.689

$\overline{\text{Mn-N}} = 2.125/2.131$   
 $\angle \text{Mn-O1-O3} = 114.9/113.5$

O1-O3 = 1.745/1.796  
O3-H1 = 1.418/1.509  
O4-H1 = 1.064/1.037  
Mn-O1 = 1.716/1.755  
Mn-O2 = 2.003/2.075

$\overline{\text{Mn-N}} = 2.149/2.132$   
 $\angle \text{Mn-O1-O3} = 119.9/142.5$   
 $\angle \text{O3-H1-O4} = 176.8/170.6$   
 $\nu_{\text{img}} = i 715.5/807.4$

O3-H1 = 0.971/0.997  
O1-O4 = 2.247/3.329  
Mn-O1 = 1.685/1.797  
Mn-O2 = 1.887/1.872

$\overline{\text{Mn-N}} = 2.169/2.157$   
 $\text{H1-O1/O4} = 1.910/1.642$   
 $\angle \text{O1-Mn-O2-O4} = 4.4/10.8$

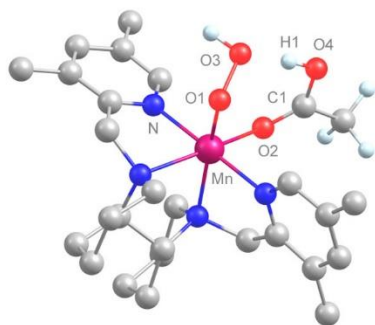

3/51

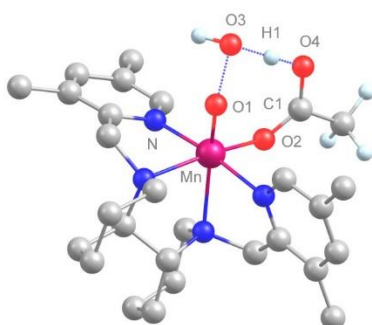

3/5TS<sub>12</sub>

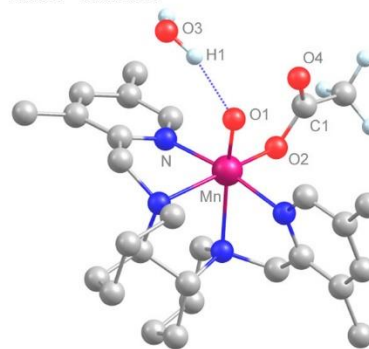

3/52

O1-O4 = 1.659/2.589  
Mn-O1 = 1.774/1.810  
Mn-O2 = 2.034/1.867  
H1-O1/O4 = 1.914/1.733

$\overline{\text{Mn-N}} = 2.159/2.162$   
 $\angle \text{O1-Mn-O2-O4} = 2.4/-3.7$   
 $\nu_{\text{img}} = i 574.3/29.0$

O1-O4 = 1.489/1.443  
O1-H1 = 1.878/1.878  
Mn-O1 = 1.876/1.932  
Mn-O2 = 1.981/2.260

$\overline{\text{Mn-N}} = 2.049/2.111$

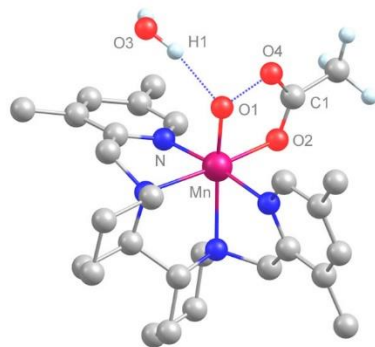

3/5TS<sub>23</sub>

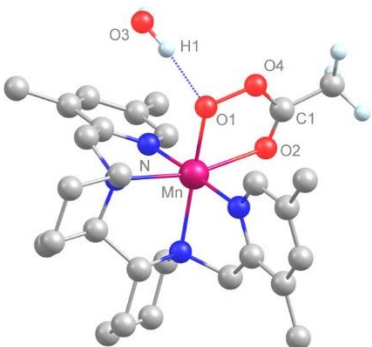

3/53

**Figure S1.** Optimized structures of the conversion of the Mn<sup>III</sup>-OOH species **1** to a cyclic Mn<sup>III</sup>-peracetate complex **3** via the high-valent metal-oxo species **2**. Calculations were done at the UB3LYP-D3(BJ)/B1 level in solvent. Hydrogen atoms of *rac*-L are omitted for clarity. Lengths are in Å units, angles are in degree units and imaginary frequencies are in cm<sup>-1</sup> units.

**Table S2.** Mulliken charges and spin densities of the conversion of the Mn<sup>III</sup>-OOH species **1** to a cyclic Mn<sup>III</sup>-peracetate complex **3** *via* the high-valent metal-oxo species **2**. Calculations were done at the UB3LYP-D3(BJ)/B1 level in solvent.

|                                    | Mulliken charge |       |               |       |      |       | spin densities |       |               |       |       |       |
|------------------------------------|-----------------|-------|---------------|-------|------|-------|----------------|-------|---------------|-------|-------|-------|
|                                    | Mn              | O1    | <i>rac</i> -L | OH    | H    | OAc   | Mn             | O1    | <i>rac</i> -L | OH    | H     | OAc   |
| <b><sup>3</sup>1</b>               | 0.65            | -0.32 | 1.48          | 0.01  | 0.37 | -0.19 | 2.14           | 0.02  | -0.16         | 0.02  | 0.00  | -0.01 |
| <b><sup>5</sup>1</b>               | 0.78            | -0.32 | 1.40          | 0.02  | 0.37 | -0.24 | 4.04           | -0.05 | -0.03         | 0.01  | 0.00  | 0.03  |
| <b><sup>3</sup>TS<sub>12</sub></b> | 0.58            | -0.30 | 1.64          | -0.12 | 0.34 | -0.14 | 2.41           | 0.07  | -0.18         | -0.31 | 0.00  | -0.01 |
| <b><sup>5</sup>TS<sub>12</sub></b> | 0.63            | -0.43 | 1.69          | -0.08 | 0.35 | -0.17 | 3.41           | 0.28  | -0.21         | 0.52  | -0.01 | 0.00  |
| <b><sup>3</sup>2</b>               | 0.52            | -0.32 | 1.87          | -0.35 | 0.33 | -0.05 | 3.00           | -0.41 | -0.29         | 0.01  | 0.00  | -0.30 |
| <b><sup>5</sup>2</b>               | 0.55            | -0.30 | 1.85          | -0.14 | 0.35 | -0.31 | 3.08           | 0.86  | -0.27         | 0.30  | -0.01 | 0.04  |
| <b><sup>3</sup>TS<sub>23</sub></b> | 0.57            | -0.33 | 1.63          | -0.34 | 0.34 | 0.13  | 2.29           | 0.03  | -0.18         | 0.00  | 0.00  | -0.13 |
| <b><sup>5</sup>TS<sub>23</sub></b> | 0.53            | -0.26 | 1.87          | -0.22 | 0.36 | -0.27 | 3.09           | 0.96  | -0.26         | 0.19  | -0.01 | 0.03  |
| <b><sup>3</sup>3</b>               | 0.48            | -0.36 | 1.69          | -0.36 | 0.35 | 0.21  | 2.13           | 0.02  | -0.14         | 0.00  | 0.00  | -0.02 |
| <b><sup>5</sup>3</b>               | 0.76            | -0.40 | 1.54          | -0.36 | 0.35 | 0.11  | 4.01           | 0.00  | -0.07         | 0.00  | 0.00  | 0.06  |

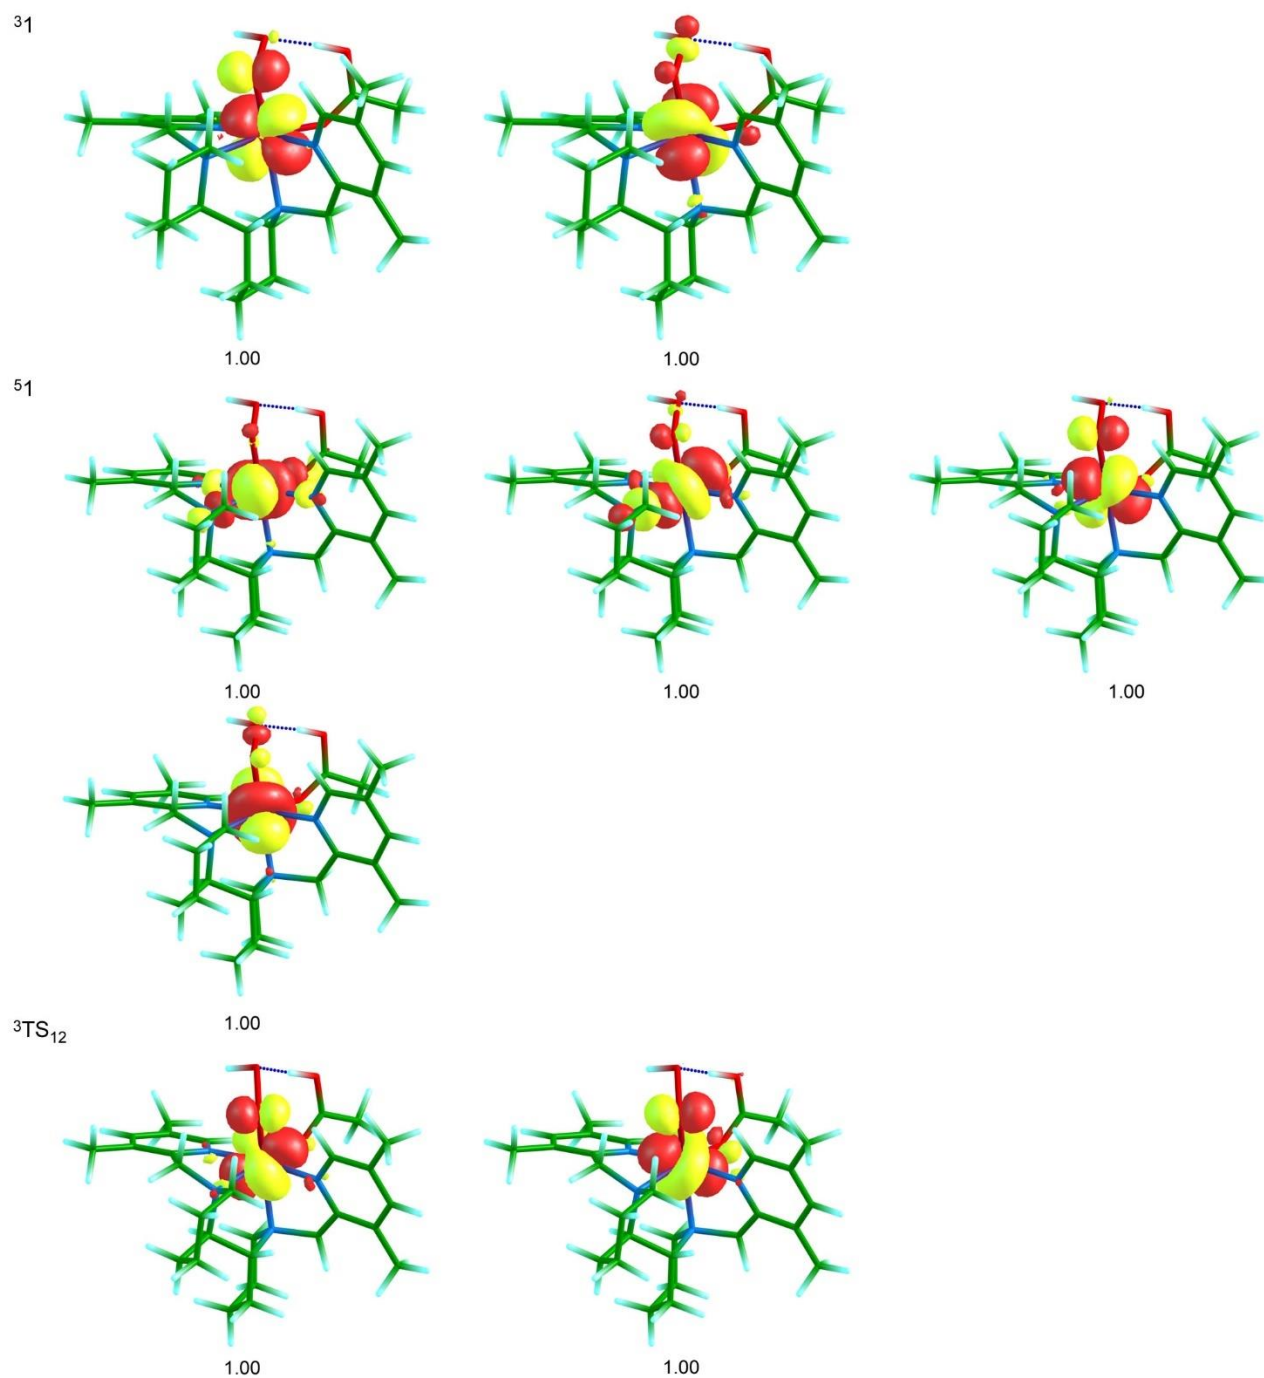

**Figure S2.** Singly-occupied natural orbitals (SNOs) of the conversion of the  $\text{Mn}^{\text{III}}\text{-OOH}$  species **1** to a cyclic  $\text{Mn}^{\text{III}}$ -peracetate complex **3** *via* the high-valent metal-oxo species **2**. Calculations were done at the UB3LYP-D3(BJ)/B1 level in solvent. Positive values represent alpha-electron occupations and netative ones represent beta occupations. (To be continued)

$^5\text{TS}_{12}$

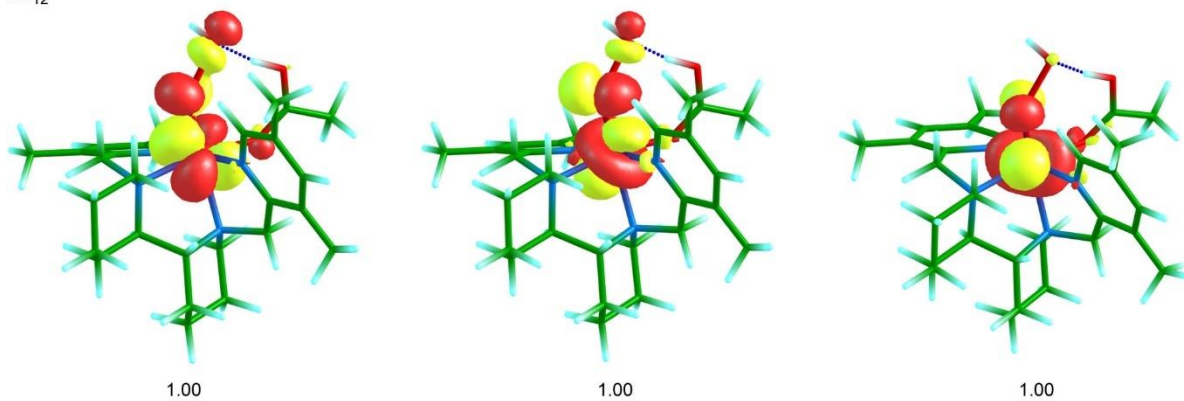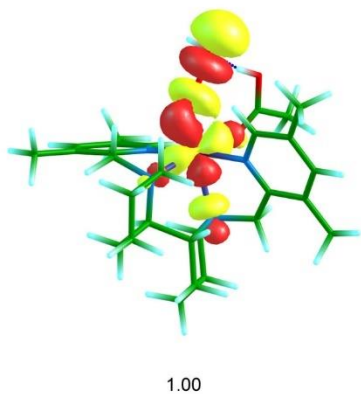

$^3\text{2}$

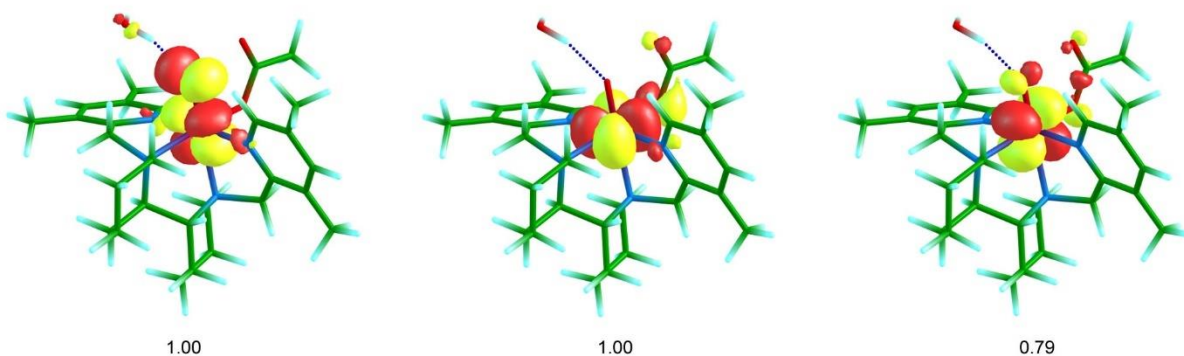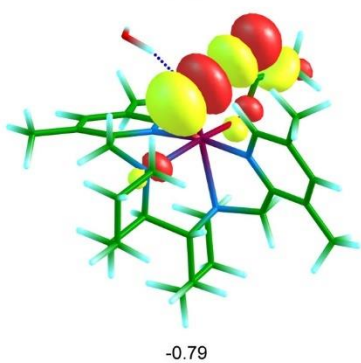

**Figure S2.** Singly-occupied natural orbitals (SNOs) of the conversion of the  $\text{Mn}^{\text{III}}\text{-OOH}$  species **1** to a cyclic  $\text{Mn}^{\text{III}}$ -peracetate complex **3** *via* the high-valent metal-oxo species **2**. Calculations were done at the UB3LYP-D3(BJ)/B1 level in solvent. Positive values represent alpha-electron occupations and netative ones represent beta occupations. (To be continued)

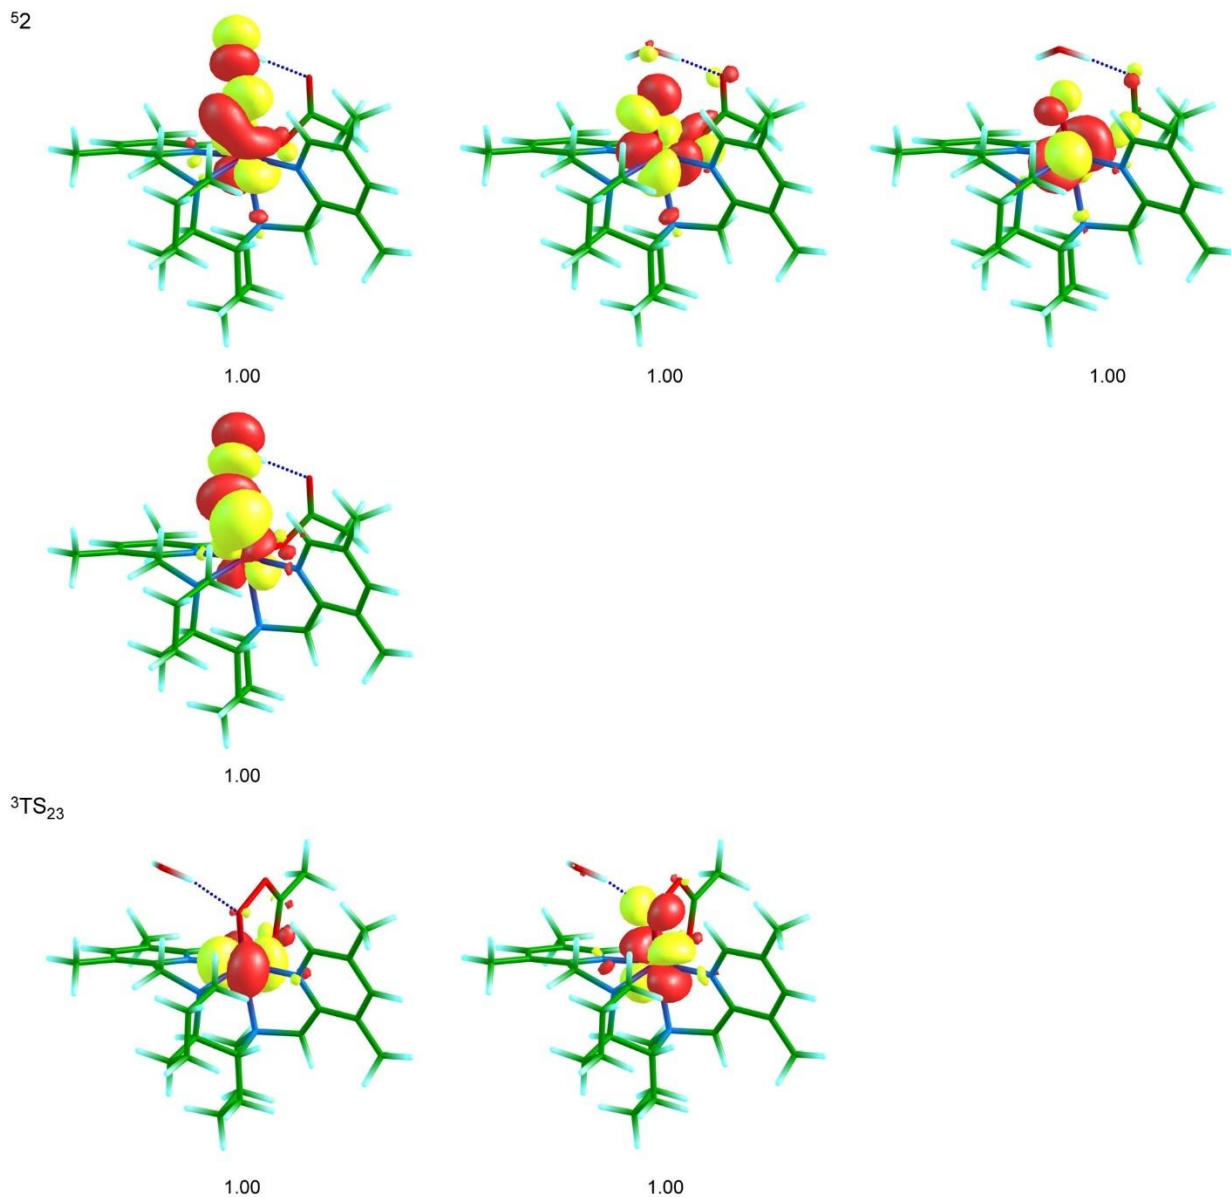

**Figure S2.** Singly-occupied natural orbitals (SNOs) of the conversion of the  $\text{Mn}^{\text{III}}\text{-OOH}$  species **1** to a cyclic  $\text{Mn}^{\text{III}}$ -peracetate complex **3** *via* the high-valent metal-oxo species **2**. Calculations were done at the UB3LYP-D3(BJ)/B1 level in solvent. Positive values represent alpha-electron occupations. (To be continued)



$^5\text{TS}_{23}$

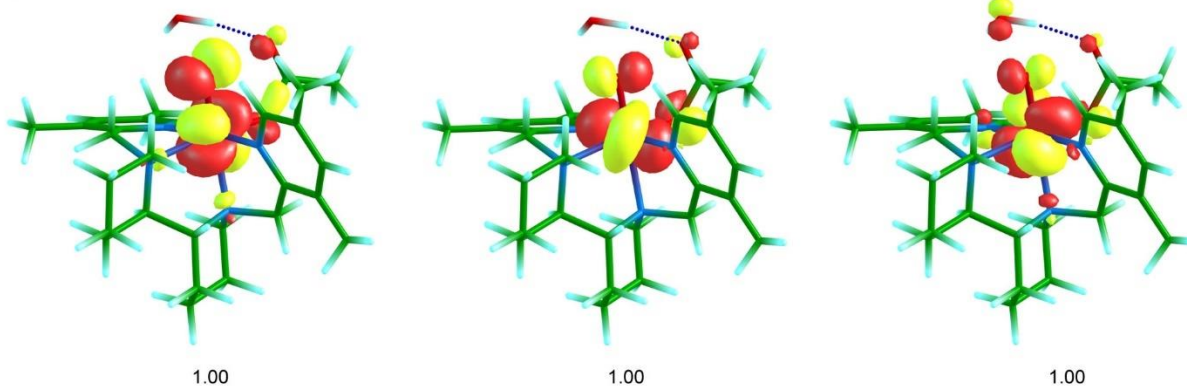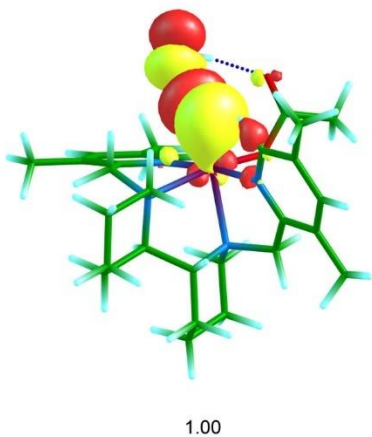

33

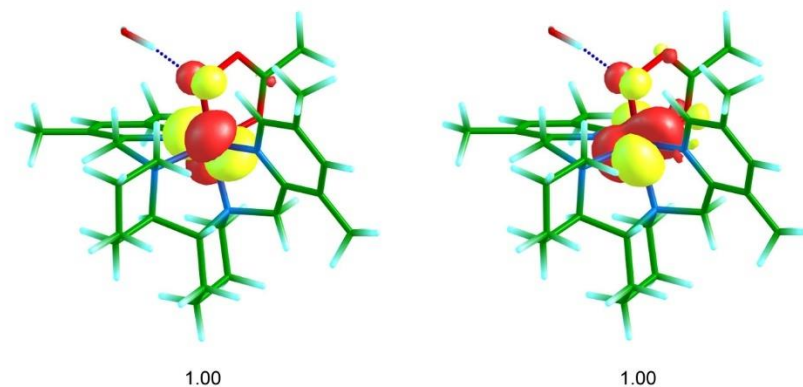

**Figure S2.** Singly-occupied natural orbitals (SNOs) of the conversion of the  $\text{Mn}^{\text{III}}\text{-OOH}$  species **1** to a cyclic  $\text{Mn}^{\text{III}}$ -peracetate complex **3** via the high-valent metal-oxo species **2**. Calculations were done at the UB3LYP-D3(BJ)/B1 level in solvent. Positive values represent alpha-electron occupations. (To be continued)

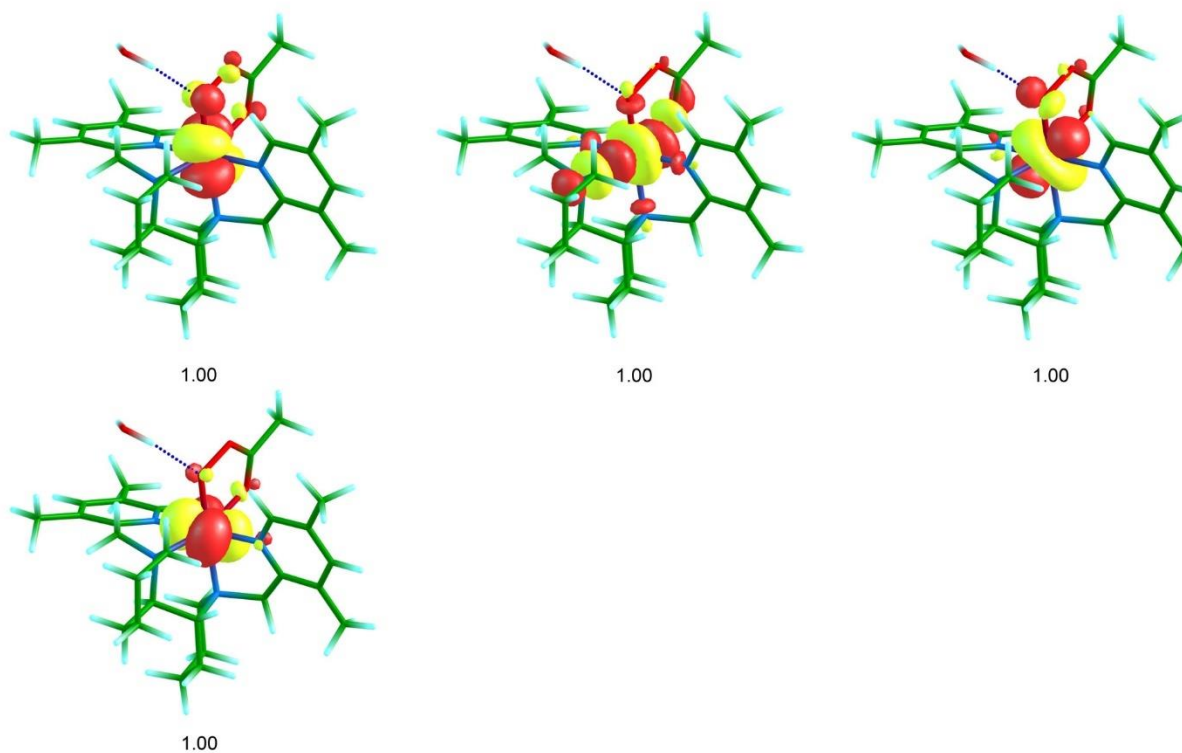

**Figure S2.** Singly-occupied natural orbitals (SNOs) of the conversion of the  $\text{Mn}^{\text{III}}$ -OOH species **1** to a cyclic  $\text{Mn}^{\text{III}}$ -peracetate complex **3** via the high-valent metal-oxo species **2**. Calculations were done at the UB3LYP-D3(BJ)/B1 level in solvent. Positive values represent alpha-electron occupations.

## Part II Hydroxylation of PBA to 4-OH-PBA by the proximal and distal oxygen of the $\text{Mn}^{\text{III}}(\text{OOH})$ species 1.

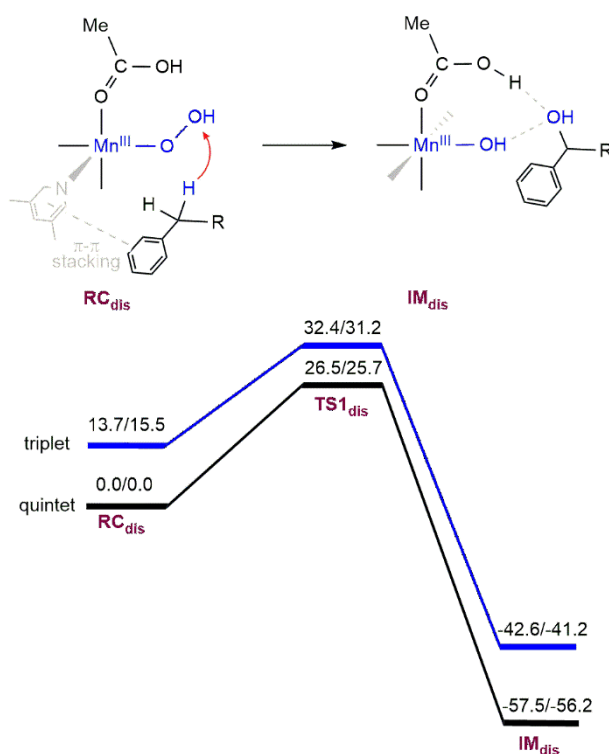

**Figure S3.** The energy profile (in kcal mol<sup>-1</sup>) for the hydroxylation of PBA by the distal oxygen of the  $\text{Mn}^{\text{III}}\text{-OOH}$  species **1**. Values before slashes are the SCF energies calculated at the UB3LYP-D3(BJ)/B2//B1 level including ZPE/B1 corrections and those after slashes are Gibbs free energies calculated at the UB3LYP-D3(BJ)/B1 level, respectively.

**Table S3.** Various SCF and Gibbs free energies of the hydroxylation of PBA by the distal oxygen of the Mn<sup>III</sup>-OOH species **1**. Calculations were done at the UB3LYP-D3(BJ)/B2//B1 level in solvent.

|                                     | OPT/B1+ZPE   | $\Delta E$   | SPE/B2+ZPE   | $\Delta E$   | $G$          | $\Delta G$   |
|-------------------------------------|--------------|--------------|--------------|--------------|--------------|--------------|
| <b><sup>3</sup>RC</b>               | -3302.046030 | <b>14.1</b>  | -3302.575136 | <b>13.7</b>  | -3302.134250 | <b>15.5</b>  |
| <b><sup>5</sup>RC</b>               | -3302.068435 | <b>0.0</b>   | -3302.596908 | <b>0.0</b>   | -3302.158912 | <b>0.0</b>   |
| <b><sup>3</sup>TS<sub>dis</sub></b> | -3302.019226 | <b>30.9</b>  | -3302.545253 | <b>32.4</b>  | -3302.109117 | <b>31.2</b>  |
| <b><sup>5</sup>TS<sub>dis</sub></b> | -3302.028792 | <b>24.9</b>  | -3302.554681 | <b>26.5</b>  | -3302.117936 | <b>25.7</b>  |
| <b><sup>3</sup>IM<sub>dis</sub></b> | -3302.136347 | <b>-42.6</b> | -3302.664814 | <b>-42.6</b> | -3302.224546 | <b>-41.2</b> |
| <b><sup>5</sup>IM<sub>dis</sub></b> | -3302.160572 | <b>-57.8</b> | -3302.688477 | <b>-57.5</b> | -3302.248510 | <b>-56.2</b> |

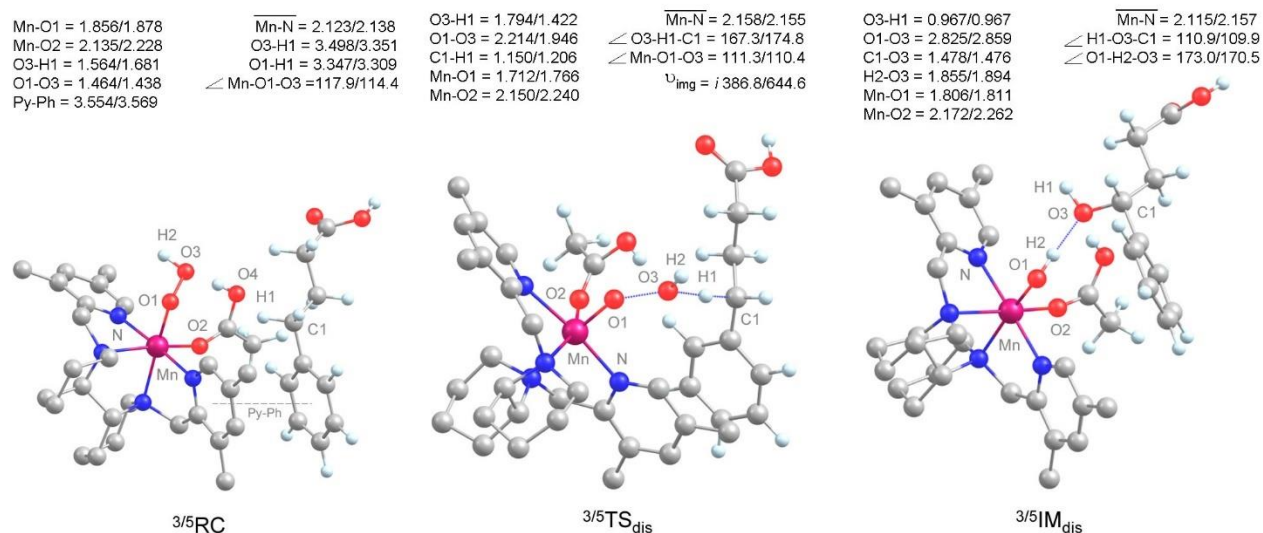

**Figure S4.** Optimized structures of key intermediates of the hydroxylation of PBA by the distal oxygen of the  $\text{Mn}^{\text{III}}$ -OOH species **1**. Calculations were done at the UB3LYP-D3(BJ)/B1 level in solvent. Hydrogen atoms of *rac*-L are omitted for clarity. Lengths are in Å units, angles are in degree units and imaginary frequency is in  $\text{cm}^{-1}$  units.

**Table S4.** Mulliken charges and spin densities of key intermediates of the hydroxylation of PBA by the distal oxygen of the Mn<sup>III</sup>-OOH species **1**. Calculations were done at the UB3LYP-D3(BJ)/B1 level in solvent.

|                                     | Mulliken charge |       |               |       |      |       |      |        | spin densities |       |               |       |      |       |      |        |
|-------------------------------------|-----------------|-------|---------------|-------|------|-------|------|--------|----------------|-------|---------------|-------|------|-------|------|--------|
|                                     | Mn              | O1    | <i>rac</i> -L | OH    | H1   | OAc   | H2   | Sub-H2 | Mn             | O1    | <i>rac</i> -L | OH    | H1   | OAc   | H2   | Sub-H2 |
| <b><sup>3</sup>RC</b>               | 0.64            | -0.33 | 1.49          | 0.00  | 0.36 | -0.19 | 0.12 | -0.09  | 2.14           | 0.03  | -0.15         | -0.01 | 0.00 | -0.01 | 0.00 | 0.00   |
| <b><sup>5</sup>RC</b>               | 0.79            | -0.32 | 1.36          | 0.02  | 0.36 | -0.24 | 0.12 | -0.09  | 4.05           | -0.05 | -0.04         | 0.01  | 0.00 | 0.03  | 0.00 | 0.00   |
| <b><sup>3</sup>TS<sub>dis</sub></b> | 0.75            | -0.29 | 1.38          | -0.21 | 0.35 | -0.26 | 0.19 | 0.09   | 3.75           | -0.82 | -0.06         | -0.61 | 0.01 | 0.03  | 0.00 | -0.29  |
| <b><sup>5</sup>TS<sub>dis</sub></b> | 0.79            | -0.38 | 1.28          | -0.18 | 0.36 | -0.26 | 0.21 | 0.17   | 3.89           | -0.55 | -0.02         | 0.25  | 0.00 | 0.03  | 0.01 | 0.39   |
| <b><sup>3</sup>IM<sub>dis</sub></b> | 0.67            | -0.65 | 1.39          | -0.22 | 0.39 | -0.25 | 0.37 | 0.30   | 2.05           | 0.10  | -0.15         | 0.01  | 0.00 | -0.01 | 0.00 | 0.00   |
| <b><sup>5</sup>IM<sub>dis</sub></b> | 0.80            | -0.65 | 1.28          | -0.21 | 0.37 | -0.27 | 0.37 | 0.30   | 3.97           | 0.03  | -0.02         | 0.01  | 0.00 | 0.02  | 0.00 | 0.00   |

$^3RC$

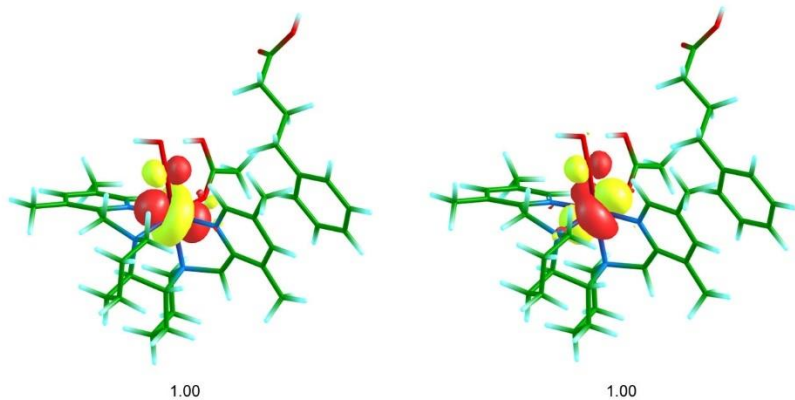

$^5RC$

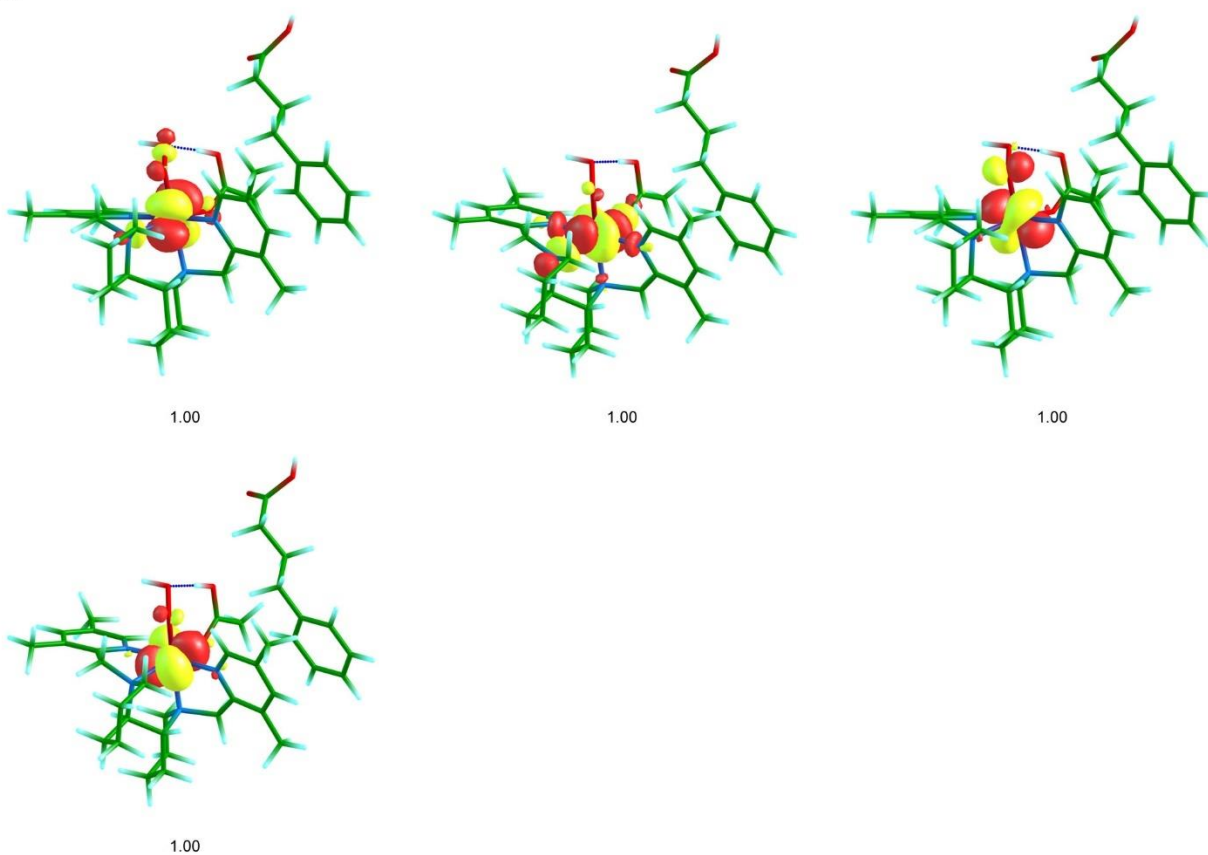

**Figure S5.** Singly-occupied natural orbitals (SNOs) of key intermediates of the hydroxylation of PBA by the distal oxygen of the  $Mn^{III}$ -OOH species **1**. Calculations were done at the UB3LYP-D3(BJ)/B1 level in solvent. Positive values represent alpha-electron occupations and negative ones represent beta occupations. (To be continued)

$^3\text{TS}_{\text{dis}}$

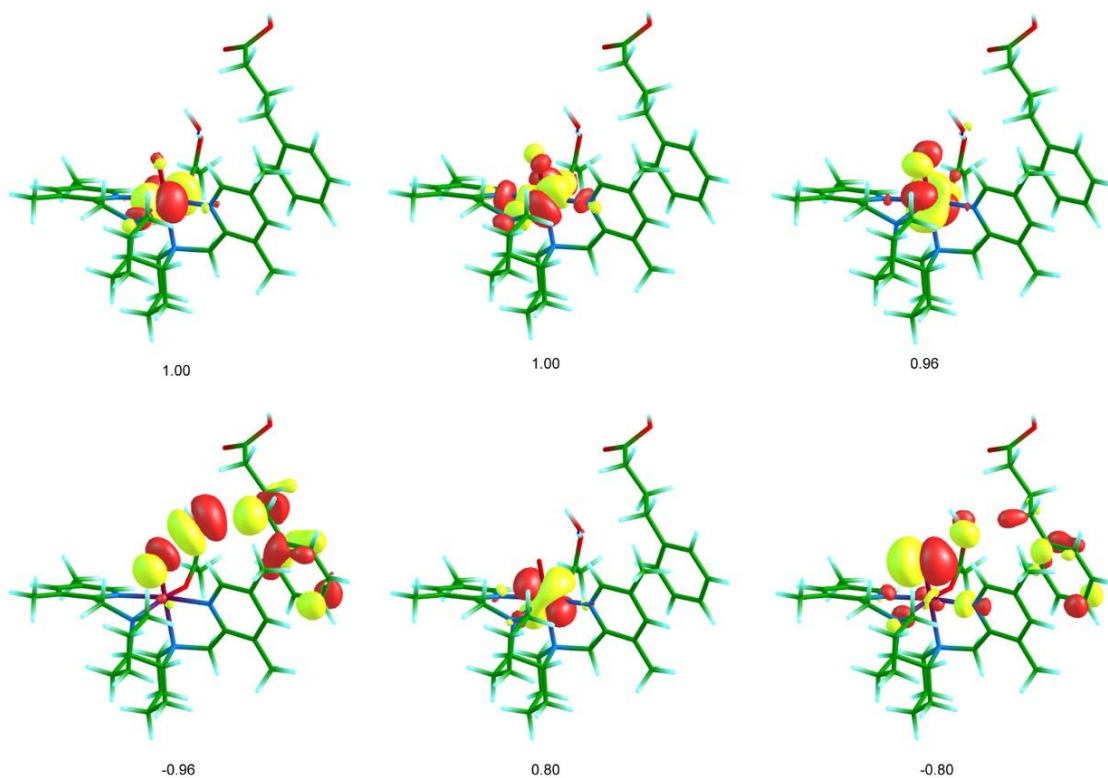

$^5\text{TS}_{\text{dis}}$

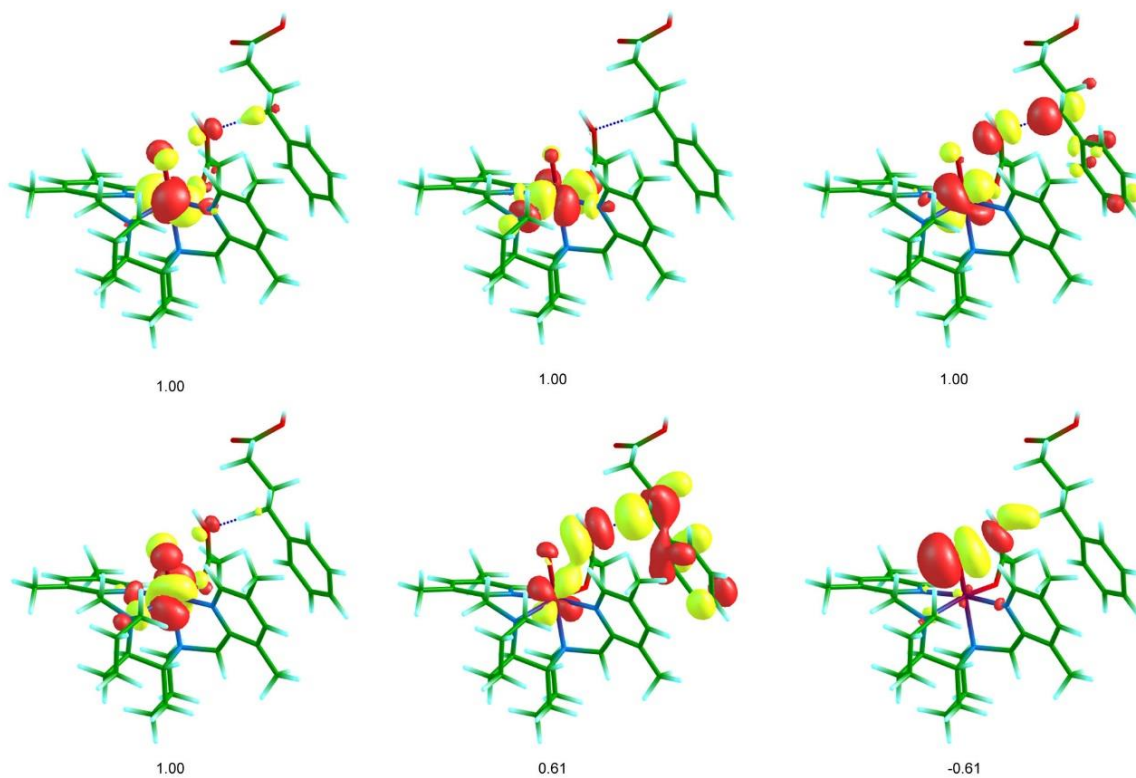

**Figure S5.** Singly-occupied natural orbitals (SNOs) of key intermediates of the hydroxylation of PBA by the distal oxygen of the  $\text{Mn}^{\text{III}}\text{-OOH}$  species **1**. Calculations were done at the UB3LYP-D3(BJ)/B1 level in solvent. Positive values represent alpha-electron occupations and negative ones represent beta occupations. (To be continued)



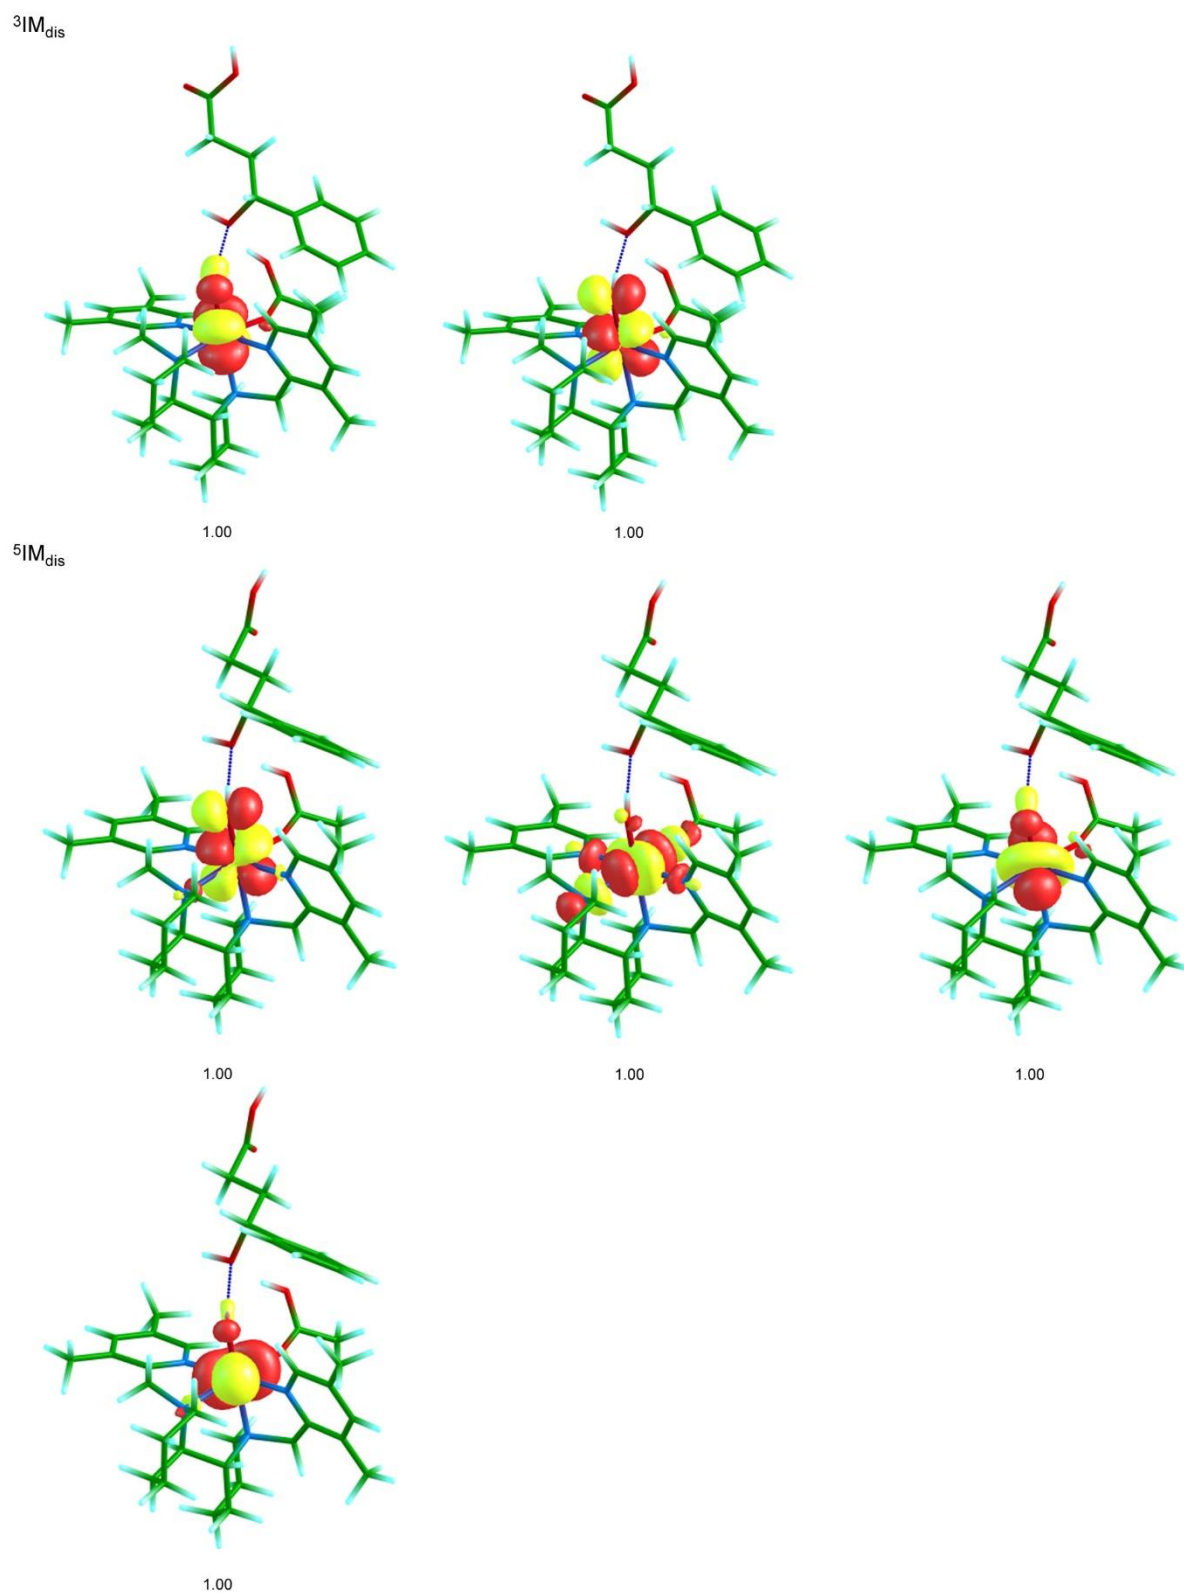

**Figure S5.** Singly-occupied natural orbitals (SNOs) of key intermediates of the hydroxylation of PBA by the distal oxygen of the  $\text{Mn}^{\text{III}}\text{-OOH}$  species **1**. Calculations were done at the UB3LYP-D3(BJ)/B1 level in solvent. Positive values represent alpha-electron occupations and negative ones represent beta occupations.

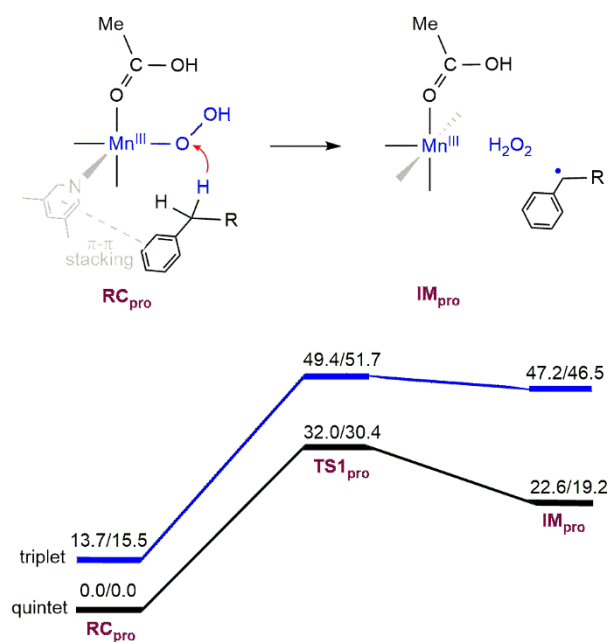

**Figure S6.** The energy profile (in kcal mol<sup>-1</sup>) for the hydroxylation of PBA by the proximal oxygen of the Mn<sup>III</sup>-OOH species **1**. Values before slashes are the SCF energies calculated at the UB3LYP-D3(BJ)/B2//B1 level including ZPE/B1 corrections and those after slashes are Gibbs free energies calculated at the UB3LYP-D3(BJ)/B1 level, respectively.

**Table S5.** Various SCF and Gibbs free energies of the hydroxylation of PBA by the proximal oxygen of the Mn<sup>III</sup>-OOH species **1**. Calculations were done at the UB3LYP-D3(BJ)/B2//B1 level in solvent.

|                                     | OPT/B1+ZPE   | $\Delta E$  | SPE/B2+ZPE   | $\Delta E$  | $G$          | $\Delta G$  |
|-------------------------------------|--------------|-------------|--------------|-------------|--------------|-------------|
| <b><sup>3</sup>RC</b>               | -3302.046030 | <b>14.1</b> | -3302.575136 | <b>13.7</b> | -3302.134250 | <b>15.5</b> |
| <b><sup>5</sup>RC</b>               | -3302.068435 | <b>0.0</b>  | -3302.596908 | <b>0.0</b>  | -3302.158912 | <b>0.0</b>  |
| <b><sup>3</sup>TS<sub>pro</sub></b> | -3301.990287 | <b>49.0</b> | -3302.518107 | <b>49.4</b> | -3302.076536 | <b>51.7</b> |
| <b><sup>5</sup>TS<sub>pro</sub></b> | -3302.020975 | <b>29.8</b> | -3302.545889 | <b>32.0</b> | -3302.110428 | <b>30.4</b> |
| <b><sup>3</sup>IM<sub>pro</sub></b> | -3301.992427 | <b>47.7</b> | -3302.521724 | <b>47.2</b> | -3302.084786 | <b>46.5</b> |
| <b><sup>5</sup>IM<sub>pro</sub></b> | -3302.033662 | <b>21.8</b> | -3302.560822 | <b>22.6</b> | -3302.128365 | <b>19.2</b> |

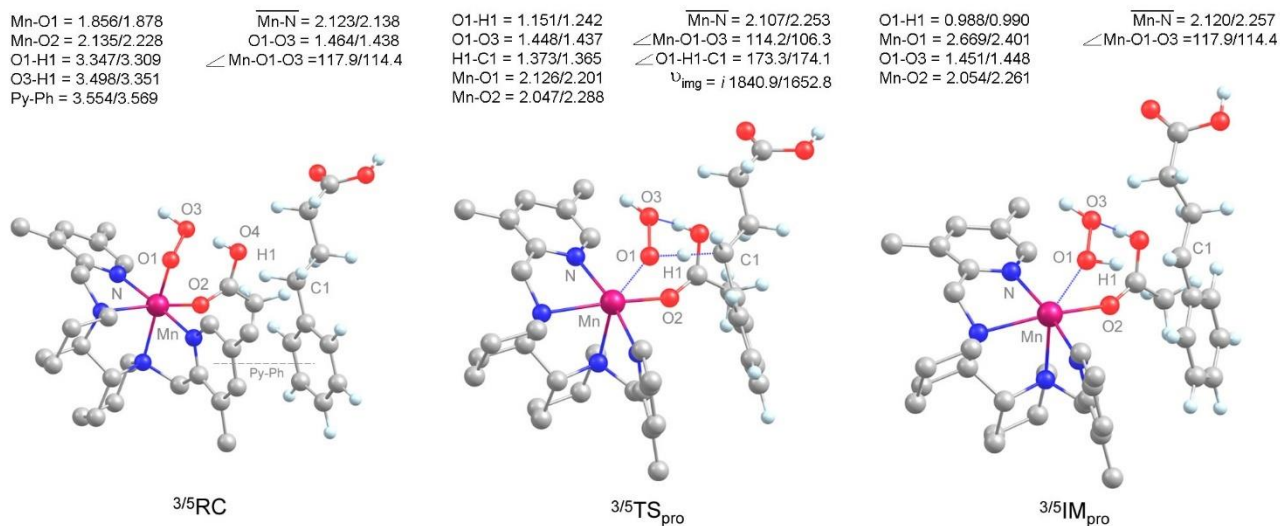

**Figure S7.** Optimized structures of key intermediates of the hydroxylation of PBA by the proximal oxygen of the  $\text{Mn}^{\text{III}}$ -OOH species **1**. Calculations were done at the UB3LYP-D3(BJ)/B1 level in solvent. Hydrogen atoms of *rac-L* are omitted for clarity. Lengths are in Å units, angles are in degree units and imaginary frequency is in  $\text{cm}^{-1}$  units.

**Table S6.** Mulliken charges and spin densities of key intermediates of the hydroxylation of PBA by the proximal oxygen of the Mn<sup>III</sup>-OOH species **1**. Calculations were done at the UB3LYP-D3(BJ)/B1 level in solvent.

|                                     | Mulliken charge |       |               |      |      |       |      |        | spin densities |       |               |       |      |       |       |        |
|-------------------------------------|-----------------|-------|---------------|------|------|-------|------|--------|----------------|-------|---------------|-------|------|-------|-------|--------|
|                                     | Mn              | O1    | <i>rac</i> -L | OH   | H1   | OAc   | H2   | Sub-H2 | Mn             | O1    | <i>rac</i> -L | OH    | H1   | OAc   | H2    | Sub-H2 |
| <b><sup>3</sup>RC</b>               | 0.64            | -0.33 | 1.49          | 0.00 | 0.36 | -0.19 | 0.12 | -0.09  | 2.14           | 0.03  | -0.15         | -0.01 | 0.00 | -0.01 | 0.00  | 0.00   |
| <b><sup>5</sup>RC</b>               | 0.79            | -0.32 | 1.36          | 0.02 | 0.36 | -0.24 | 0.12 | -0.09  | 4.05           | -0.05 | -0.04         | 0.01  | 0.00 | 0.03  | 0.00  | 0.00   |
| <b><sup>3</sup>TS<sub>pro</sub></b> | 0.76            | -0.36 | 1.19          | 0.04 | 0.37 | -0.18 | 0.24 | -0.04  | 2.72           | -0.14 | -0.13         | 0.01  | 0.00 | -0.01 | -0.02 | -0.43  |
| <b><sup>5</sup>TS<sub>pro</sub></b> | 1.08            | -0.37 | 0.75          | 0.01 | 0.38 | -0.27 | 0.25 | 0.17   | 4.78           | -0.19 | 0.08          | -0.01 | 0.00 | 0.01  | -0.04 | -0.63  |
| <b><sup>3</sup>IM<sub>pro</sub></b> | 0.84            | -0.33 | 0.95          | 0.01 | 0.36 | -0.23 | 0.31 | 0.09   | 3.07           | -0.01 | -0.07         | 0.00  | 0.00 | -0.01 | -0.03 | -0.95  |
| <b><sup>5</sup>IM<sub>pro</sub></b> | 1.09            | -0.33 | 0.71          | 0.02 | 0.37 | -0.27 | 0.32 | 0.09   | 4.86           | 0.00  | 0.11          | 0.01  | 0.00 | 0.01  | -0.04 | -0.95  |

$^3RC$

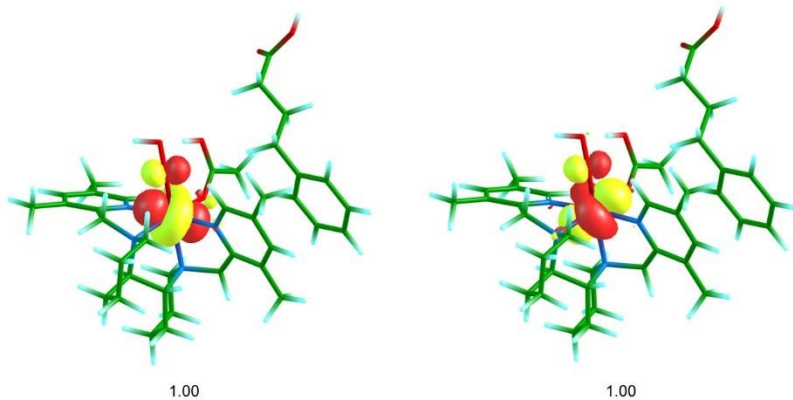

$^5RC$

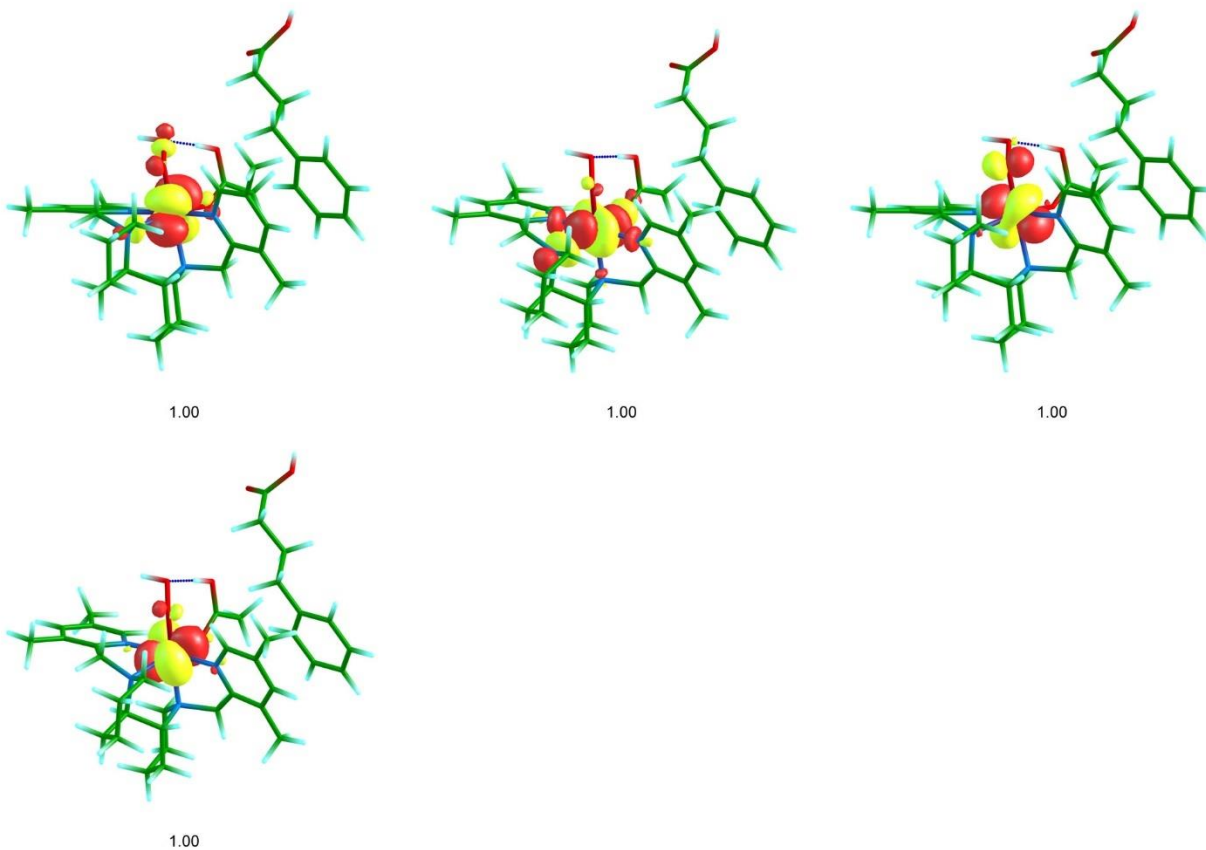

**Figure S8.** Singly-occupied natural orbitals (SNOs) of key intermediates of the hydroxylation of PBA by the proximal oxygen of the  $Mn^{III}$ -OOH species **1**. Calculations were done at the UB3LYP-D3(BJ)/B1 level in solvent. Positive values represent alpha-electron occupations and netative ones represent beta occupations. (To be continued)

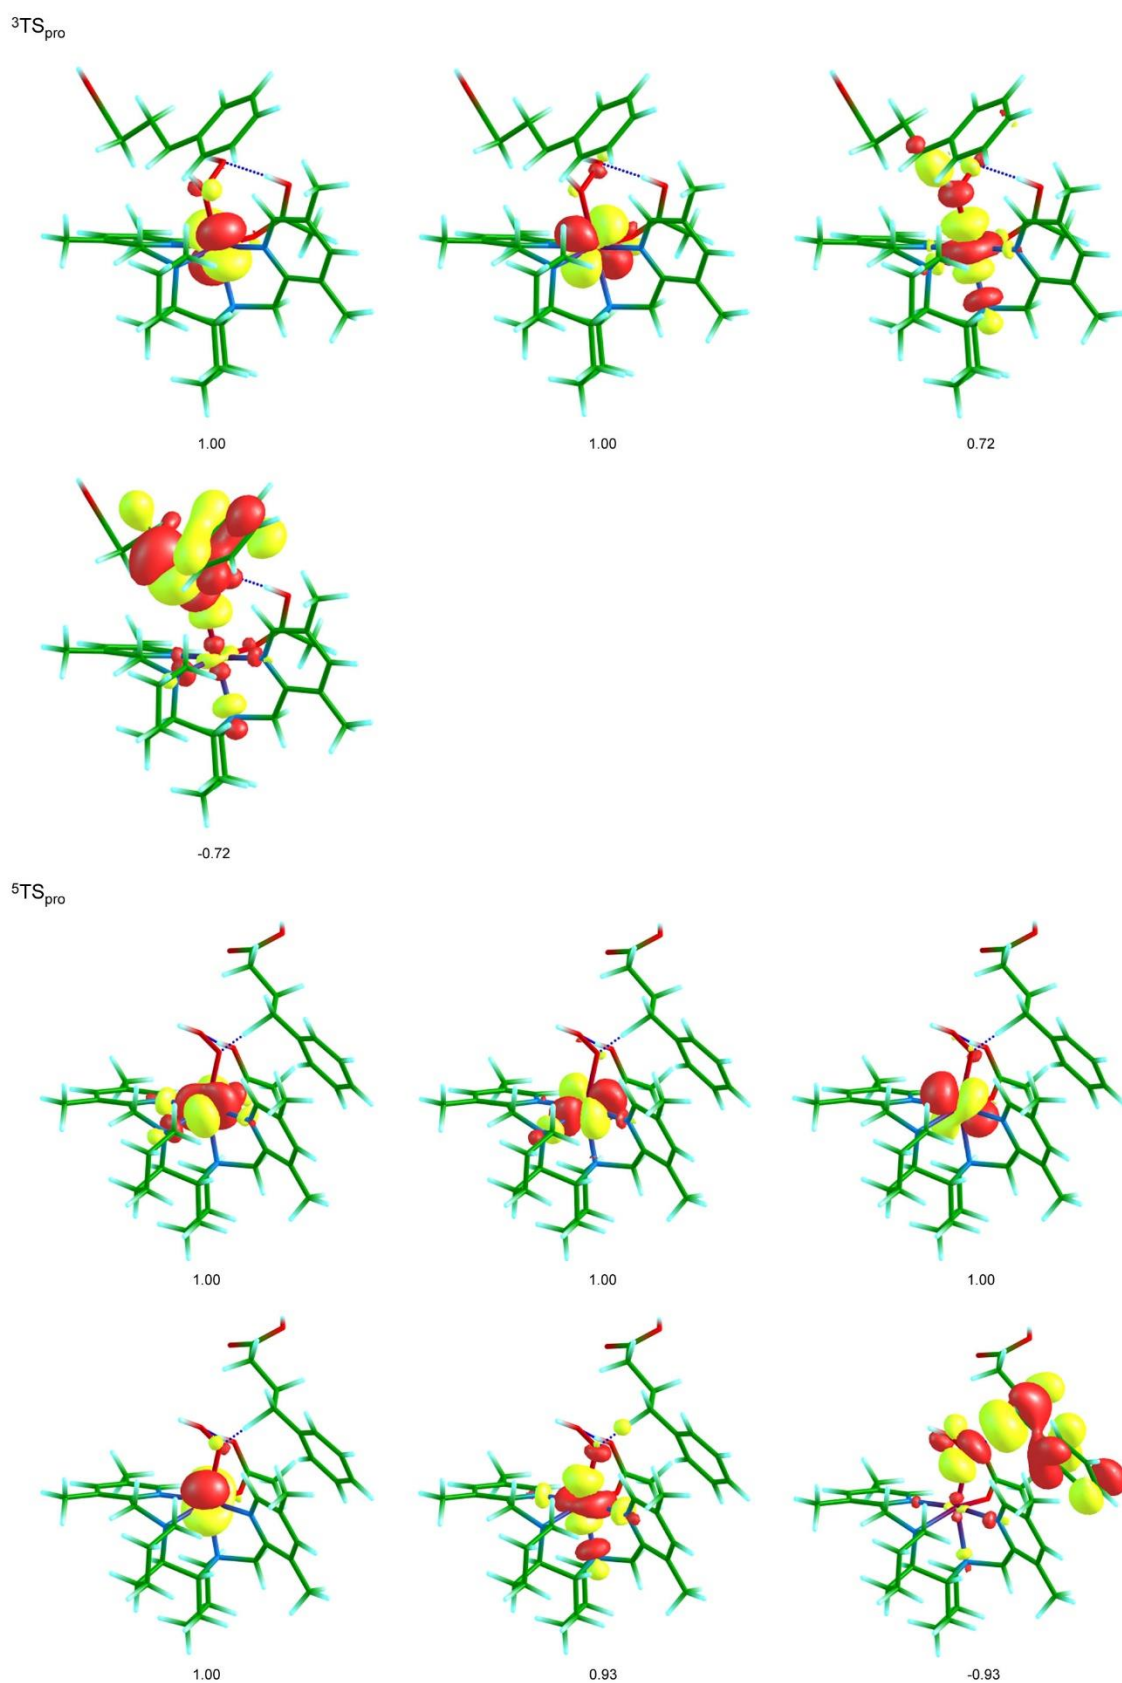

**Figure S8.** Singly-occupied natural orbitals (SNOs) of key intermediates of the hydroxylation of PBA by the proximal oxygen of the  $\text{Mn}^{\text{III}}\text{-OOH}$  species **1**. Calculations were done at the UB3LYP-D3(BJ)/B1 level in solvent. Positive values represent alpha-electron occupations and negative ones represent beta occupations. (To be continued)

$^3\text{IM}_{\text{pro}}$

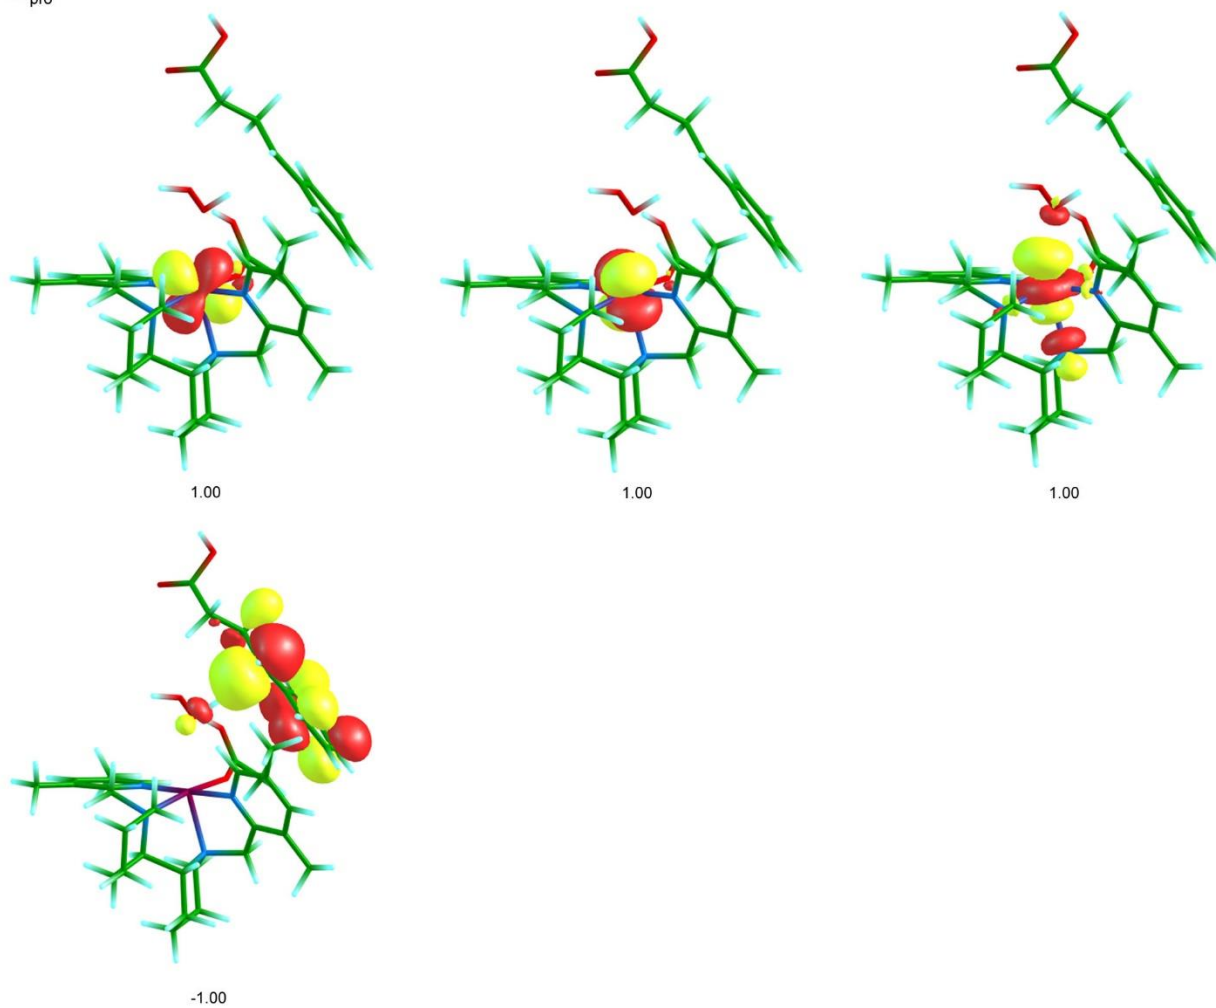

**Figure S8.** Singly-occupied natural orbitals (SNOs) of key intermediates of the hydroxylation of PBA by the proximal oxygen of the  $\text{Mn}^{\text{III}}$ -OOH species **1**. Calculations were done at the UB3LYP-D3(BJ)/B1 level in solvent. Positive values represent alpha-electron occupations and netative ones represent beta occupations. (To be continued)



$^5M_{pro}$

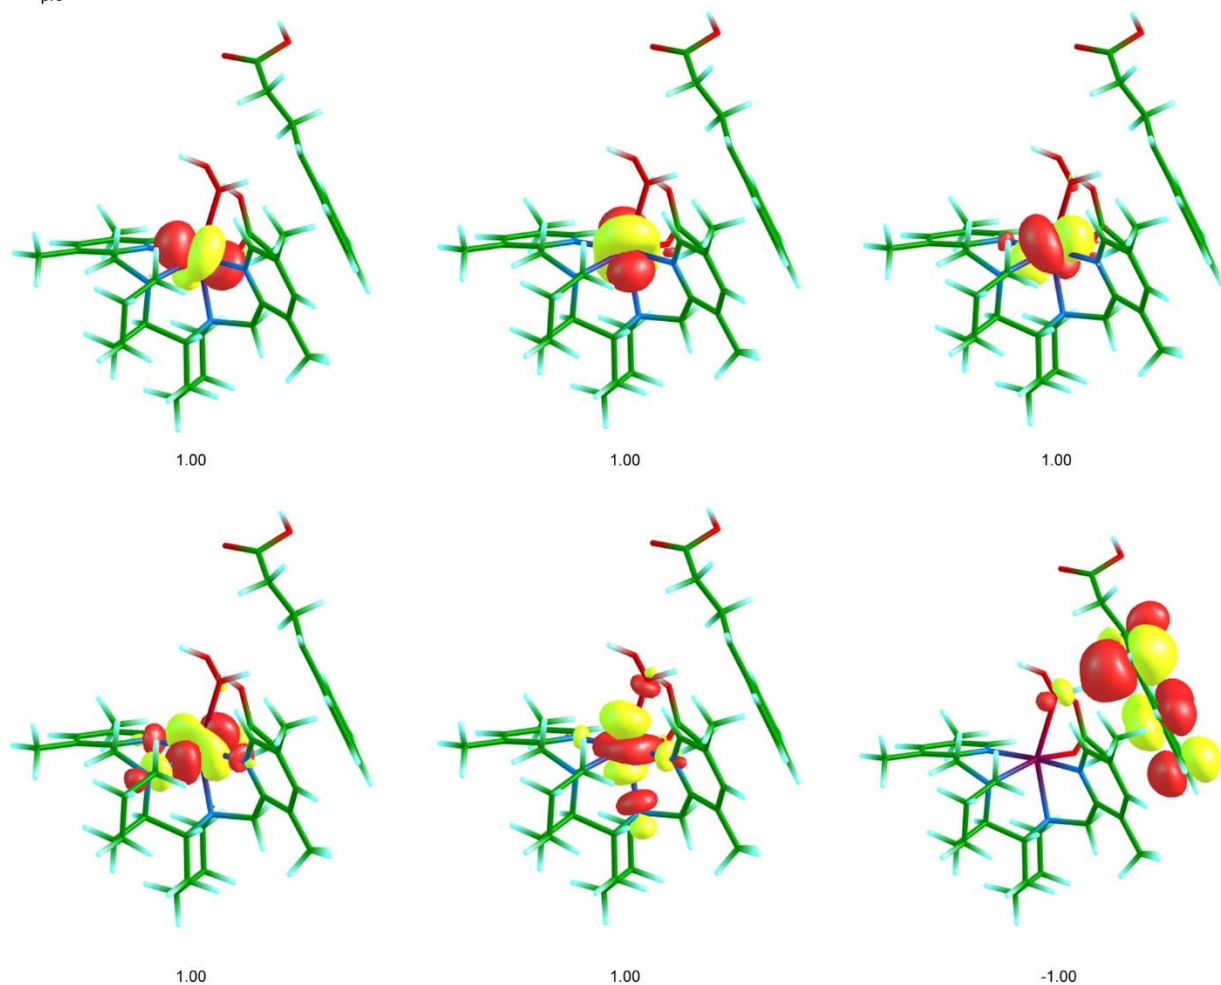

**Figure S8.** Singly-occupied natural orbitals (SNOs) of key intermediates of the hydroxylation of PBA by the proximal oxygen of the  $Mn^{III}$ -OOH species **1**. Calculations were done at the UB3LYP-D3(BJ)/B1 level in solvent. Positive values represent alpha-electron occupations and netative ones represent beta occupations.

**Part III Hydroxylation of PBA to 4-OH-PBA by the Mn<sup>IV</sup>(O)(AcO<sup>•</sup>) species 2 generated from the Mn<sup>III</sup>-OOH species 1.**

**Table S7.** Various SCF and Gibbs free energies of the hydroxylation of PBA by the high-valent Mn-oxo species 2 generated from the Mn<sup>III</sup>-OOH species 1. Calculations were done at the UB3LYP-D3(BJ)/B2//B1 level in solvent.

|                  | OPT/B1+ZPE   | $\Delta E$   | SPE/B2+ZPE   | $\Delta E$   | $G$          | $\Delta G$   |
|------------------|--------------|--------------|--------------|--------------|--------------|--------------|
| <sup>3</sup> RC  | -3302.046030 | <b>14.1</b>  | -3302.575136 | <b>13.7</b>  | -3302.134250 | <b>15.5</b>  |
| <sup>5</sup> RC  | -3302.068435 | <b>0.0</b>   | -3302.596908 | <b>0.0</b>   | -3302.158912 | <b>0.0</b>   |
| <sup>3</sup> TS1 | -3302.039249 | <b>18.3</b>  | -3302.567879 | <b>18.2</b>  | -3302.128022 | <b>19.4</b>  |
| <sup>5</sup> TS1 | -3302.023681 | <b>28.1</b>  | -3302.551095 | <b>28.7</b>  | -3302.113539 | <b>28.5</b>  |
| <sup>3</sup> IM1 | -3302.067290 | <b>0.7</b>   | -3302.596887 | <b>0.0</b>   | -3302.157976 | <b>0.6</b>   |
| <sup>5</sup> IM1 | -3302.039694 | <b>18.0</b>  | -3302.568248 | <b>18.0</b>  | -3302.132223 | <b>16.7</b>  |
| <sup>3</sup> TS2 | -3302.063018 | <b>3.4</b>   | -3302.590385 | <b>4.1</b>   | -3302.147404 | <b>7.2</b>   |
| <sup>5</sup> TS2 | -3302.033582 | <b>21.9</b>  | -3302.568112 | <b>18.1</b>  | -3302.119675 | <b>24.6</b>  |
| <sup>3</sup> IM2 | -3302.117477 | <b>-30.8</b> | -3302.644156 | <b>-29.6</b> | -3302.204443 | <b>-28.6</b> |
| <sup>5</sup> IM2 | -3302.134953 | <b>-41.7</b> | -3302.660117 | <b>-39.7</b> | -3302.224128 | <b>-40.9</b> |
| <sup>3</sup> TS3 | -3302.111578 | <b>-27.1</b> | -3302.637165 | <b>-25.3</b> | -3302.194782 | <b>-22.5</b> |
| <sup>5</sup> TS3 | -3302.130050 | <b>-38.7</b> | -3302.654573 | <b>-36.2</b> | -3302.213569 | <b>-34.3</b> |
| <sup>3</sup> PC  | -3302.137244 | <b>-43.2</b> | -3302.666140 | <b>-43.4</b> | -3302.222632 | <b>-40.0</b> |
| <sup>5</sup> PC  | -3302.166907 | <b>-61.8</b> | -3302.695061 | <b>-61.6</b> | -3302.253274 | <b>-59.2</b> |

Mn-O1 = 1.856/1.878  
 Mn-O2 = 2.135/2.228  
 O3-H1 = 1.564/1.681  
 O1-O3 = 1.464/1.438  
 Py-Ph = 3.554/3.569

Mn-N = 2.123/2.138  
 O3-H2 = 3.498/3.351  
 O1-H2 = 3.347/3.309  
 $\angle$  Mn-O1-O3 = 117.9/114.4

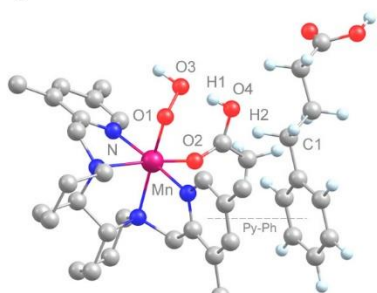

3/5RC

O3-H1 = 1.396/1.669  
 O1-O3 = 1.742/2.038  
 H1-O4 = 1.071/0.999  
 Mn-O1 = 1.718/1.777  
 Mn-O2 = 2.011/2.235  
 Py-Ph = 3.563/3.576

Mn-N = 2.148/2.137  
 $\angle$  Mn-O1-O3 = 120.4/117.0  
 $\angle$  O3-H1-O4 = 176.4/170.8  
 $\nu_{\text{img}} = i 726.0/366.2$

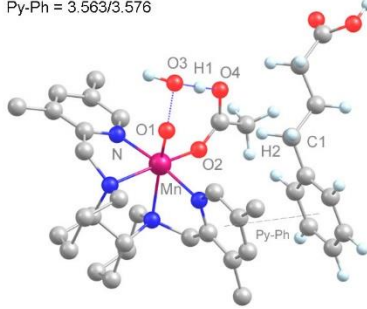

3/5TS1

O1-O4 = 2.342/3.314  
 H1-O4 = 2.107/1.631  
 O1-H1 = 3.720/3.250  
 C1-O1 = 4.698/4.318  
 Mn-O1 = 1.678/1.799  
 Mn-O2 = 1.881/1.881  
 Py-Ph = 3.554/3.475

Mn-N = 2.169/2.157  
 $\angle$  O1-Mn-O2-O4 = 5.8/-7.8

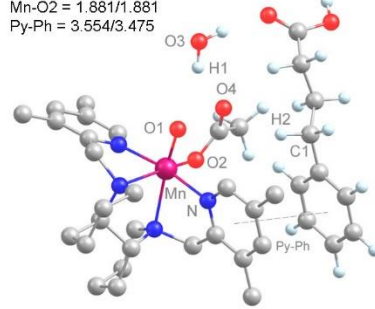

3/5IM

H2-O1 = 1.675/1.966  
 H2-C1 = 1.153/1.105  
 O1-O4 = 3.233/3.199  
 Mn-O1 = 1.686/1.814  
 Mn-O2 = 1.871/1.886

Mn-N = 2.163/2.158  
 $\angle$  O1-H2-C1 = 168.3/172.7  
 $\angle$  O1-Mn-O2-O4 = -37.4/-30.5  
 $\nu_{\text{img}} = i 28.7/15.1$

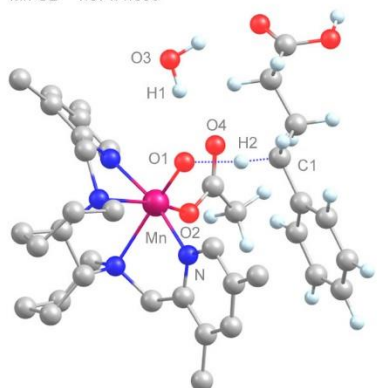

3/5TS2

H2-O1 = 0.984/0.984  
 O1-O4 = 3.345/2.707  
 O1-C1 = 3.267/3.236  
 Mn-O1 = 1.814/1.835  
 Mn-O2 = 2.030/1.986

Mn-N = 2.149/2.195  
 $\angle$  O1-Mn-O2-O4 = -28.7/-21.5

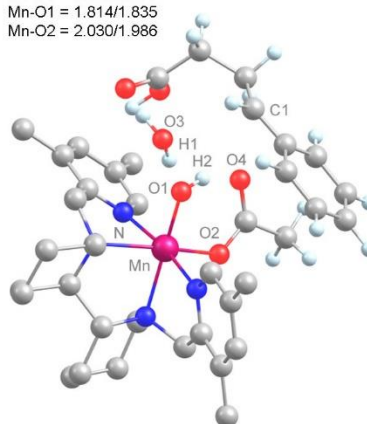

3/5IM2

O1-C1 = 2.481/2.195  
 H2-O1 = 0.988/0.986  
 Mn-O1 = 1.841/1.929  
 Mn-O2 = 2.008/1.941

Mn-N = 2.156/2.211  
 $\angle$  Mn-O1-C1 = 119.7/137.2  
 $\angle$  O1-Mn-O2-O4 = -41.1/-32.6  
 $\nu_{\text{img}} = i 60.7/150.7$

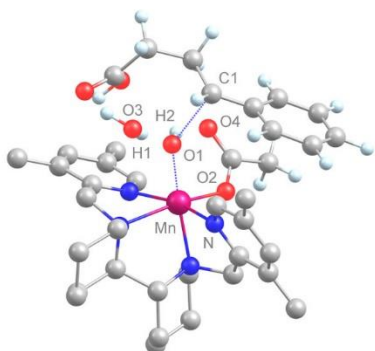

3/5TS3

O1-C1 = 1.443/1.442  
 H2-O1 = 0.982/0.981  
 Mn-O1 = 3.634/3.616  
 Mn-O2 = 1.884/1.893

Mn-N = 2.032/2.097  
 $\angle$  O1-Mn-O2-O4 = 17.0/16.4

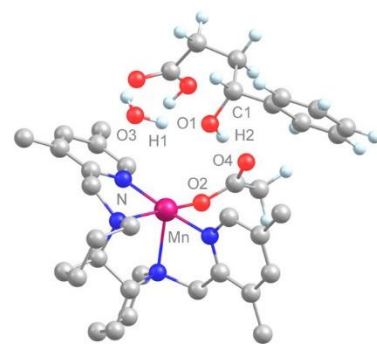

3/5PC

**Figure S9.** Optimized structures of the hydroxylation of PBA by the high-valent Mn-oxo species **2** generated from the Mn<sup>III</sup>-OOH species **1**. Calculations were done at the UB3LYP-D3(BJ)/B1 level in solvent. Hydrogen atoms of *rac*-L are omitted for clarity. Lengths are in Å units, angles are in degree units and imaginary frequencies are in cm<sup>-1</sup> units.

**Table S8.** Mulliken charges and spin densities of the hydroxylation of PBA by the high-valent Mn-oxo species **2** generated from the Mn<sup>III</sup>-OOH species **1**. Calculations were done at the UB3LYP-D3(BJ)/B1 level.

|                        | Mulliken charge |       |               |       |      |       |      |        | spin densities |       |               |       |       |       |       |        |
|------------------------|-----------------|-------|---------------|-------|------|-------|------|--------|----------------|-------|---------------|-------|-------|-------|-------|--------|
|                        | Mn              | O1    | <i>rac</i> -L | OH    | H1   | OAc   | H2   | Sub-H2 | Mn             | O1    | <i>rac</i> -L | OH    | H1    | OAc   | H2    | Sub-H2 |
| <b><sup>3</sup>RC</b>  | 0.64            | -0.33 | 1.49          | 0.00  | 0.36 | -0.19 | 0.12 | -0.09  | 2.14           | 0.03  | -0.15         | -0.01 | 0.00  | -0.01 | 0.00  | 0.00   |
| <b><sup>5</sup>RC</b>  | 0.79            | -0.32 | 1.36          | 0.02  | 0.36 | -0.24 | 0.12 | -0.09  | 4.05           | -0.05 | -0.04         | 0.01  | 0.00  | 0.03  | 0.00  | 0.00   |
| <b><sup>3</sup>TS1</b> | 0.58            | -0.30 | 1.62          | -0.11 | 0.34 | -0.15 | 0.11 | -0.08  | 2.42           | 0.07  | -0.18         | -0.30 | 0.00  | -0.01 | 0.00  | 0.00   |
| <b><sup>5</sup>TS1</b> | 0.75            | -0.34 | 1.45          | 0.00  | 0.35 | -0.24 | 0.12 | -0.09  | 3.87           | -0.57 | -0.07         | 0.74  | -0.01 | 0.03  | 0.00  | 0.00   |
| <b><sup>3</sup>IM1</b> | 0.49            | -0.25 | 1.87          | -0.39 | 0.35 | -0.13 | 0.12 | -0.05  | 2.98           | -0.46 | -0.29         | 0.00  | 0.00  | -0.22 | 0.00  | 0.00   |
| <b><sup>5</sup>IM1</b> | 0.56            | -0.30 | 1.82          | -0.14 | 0.35 | -0.31 | 0.12 | -0.10  | 3.10           | 0.86  | -0.28         | 0.30  | -0.01 | 0.03  | 0.00  | 0.00   |
| <b><sup>3</sup>TS2</b> | 0.56            | -0.38 | 1.76          | -0.38 | 0.34 | -0.33 | 0.18 | 0.26   | 2.90           | -0.21 | -0.26         | 0.00  | 0.00  | 0.01  | -0.02 | -0.42  |
| <b><sup>5</sup>TS2</b> | 0.56            | -0.30 | 1.84          | -0.17 | 0.34 | -0.31 | 0.16 | -0.13  | 3.13           | 0.89  | -0.29         | 0.25  | -0.01 | 0.02  | 0.00  | 0.01   |
| <b><sup>3</sup>IM2</b> | 0.71            | -0.68 | 1.25          | -0.37 | 0.36 | -0.57 | 0.37 | 0.95   | 2.07           | 0.08  | -0.13         | 0.00  | 0.00  | -0.02 | 0.01  | 0.00   |
| <b><sup>5</sup>IM2</b> | 0.87            | -0.73 | 1.11          | -0.38 | 0.37 | -0.50 | 0.33 | 0.93   | 3.96           | 0.01  | 0.00          | 0.00  | 0.00  | 0.03  | 0.01  | 0.00   |
| <b><sup>3</sup>TS3</b> | 0.73            | -0.68 | 1.27          | -0.35 | 0.36 | -0.54 | 0.37 | 0.85   | 2.09           | 0.04  | -0.13         | 0.00  | 0.00  | -0.02 | 0.01  | 0.01   |
| <b><sup>5</sup>TS3</b> | 0.91            | -0.72 | 1.15          | -0.33 | 0.34 | -0.45 | 0.35 | 0.75   | 4.02           | -0.02 | -0.03         | 0.00  | 0.00  | 0.00  | 0.00  | 0.01   |
| <b><sup>3</sup>PC</b>  | 0.77            | -0.57 | 1.65          | -0.38 | 0.38 | -0.41 | 0.36 | 0.20   | 2.17           | 0.00  | -0.20         | 0.00  | 0.00  | 0.04  | 0.00  | 0.00   |
| <b><sup>5</sup>PC</b>  | 0.92            | -0.58 | 1.48          | -0.38 | 0.38 | -0.40 | 0.36 | 0.21   | 4.05           | 0.00  | -0.05         | 0.00  | 0.00  | 0.00  | 0.00  | 0.00   |

**Table S9.** The spin density variation of key moieties by the approach of oxo to the benzylic C-H group of PBA.  $d_{OH}$  denotes the distance between the oxo and the benzylic hydrogen, Lengths are in Å units. Calculations were done at the UB3LYP-D3(BJ)/B1 level.

| $d_{OH}$ | spin densities |       |               |      |      |       |       |       |
|----------|----------------|-------|---------------|------|------|-------|-------|-------|
|          | Mn             | O1    | <i>rac</i> -L | OH   | H1   | OAc   | H2    | Sub-H |
| 1.83     | 2.88           | -0.26 | -0.27         | 0.00 | 0.00 | 0.00  | -0.01 | -0.34 |
| 1.81     | 2.89           | -0.25 | -0.27         | 0.00 | 0.00 | 0.01  | -0.01 | -0.36 |
| 1.79     | 2.89           | -0.25 | -0.27         | 0.00 | 0.00 | 0.01  | -0.01 | -0.37 |
| 1.77     | 2.89           | -0.24 | -0.27         | 0.00 | 0.00 | 0.01  | -0.01 | -0.38 |
| 1.75     | 2.89           | -0.23 | -0.26         | 0.00 | 0.00 | 0.01  | -0.01 | -0.38 |
| 1.73     | 2.89           | -0.23 | -0.26         | 0.00 | 0.00 | 0.01  | -0.02 | -0.39 |
| 1.71     | 2.90           | -0.22 | -0.26         | 0.00 | 0.00 | 0.01  | -0.02 | -0.40 |
| 1.69     | 2.90           | -0.22 | -0.26         | 0.00 | 0.00 | 0.01  | -0.02 | -0.41 |
| 1.67     | 2.90           | -0.21 | -0.26         | 0.00 | 0.00 | 0.01  | -0.02 | -0.42 |
| 1.65     | 2.87           | -0.10 | -0.23         | 0.00 | 0.00 | 0.01  | -0.03 | -0.52 |
| 1.63     | 2.87           | -0.10 | -0.23         | 0.00 | 0.00 | 0.01  | -0.03 | -0.52 |
| 1.61     | 2.87           | -0.09 | -0.23         | 0.00 | 0.00 | 0.01  | -0.03 | -0.53 |
| 1.59     | 2.88           | -0.09 | -0.23         | 0.00 | 0.00 | 0.01  | -0.04 | -0.54 |
| 1.57     | 2.88           | -0.08 | -0.23         | 0.00 | 0.00 | 0.01  | -0.04 | -0.54 |
| 1.55     | 2.88           | -0.08 | -0.23         | 0.00 | 0.00 | 0.01  | -0.04 | -0.55 |
| 1.53     | 2.88           | -0.07 | -0.23         | 0.00 | 0.00 | 0.01  | -0.04 | -0.56 |
| 1.51     | 2.89           | -0.07 | -0.23         | 0.00 | 0.00 | 0.01  | -0.04 | -0.56 |
| 1.49     | 2.89           | -0.06 | -0.23         | 0.00 | 0.00 | 0.01  | -0.04 | -0.57 |
| 1.47     | 2.89           | -0.06 | -0.23         | 0.00 | 0.00 | 0.01  | -0.04 | -0.58 |
| 1.45     | 2.90           | -0.05 | -0.23         | 0.00 | 0.00 | 0.01  | -0.04 | -0.59 |
| 1.43     | 2.90           | -0.04 | -0.23         | 0.00 | 0.00 | 0.01  | -0.04 | -0.60 |
| 1.33     | 2.91           | 0.00  | -0.23         | 0.00 | 0.00 | 0.01  | -0.05 | -0.65 |
| 1.23     | 2.95           | 0.06  | -0.24         | 0.00 | 0.00 | 0.02  | -0.06 | -0.73 |
| 1.13     | 3.01           | 0.09  | -0.27         | 0.00 | 0.00 | 0.02  | -0.05 | -0.80 |
| 1.03     | 3.10           | 0.10  | -0.30         | 0.00 | 0.00 | 0.02  | -0.03 | -0.89 |
| 0.98     | 2.07           | 0.08  | -0.13         | 0.00 | 0.00 | -0.02 | 0.01  | 0.00  |

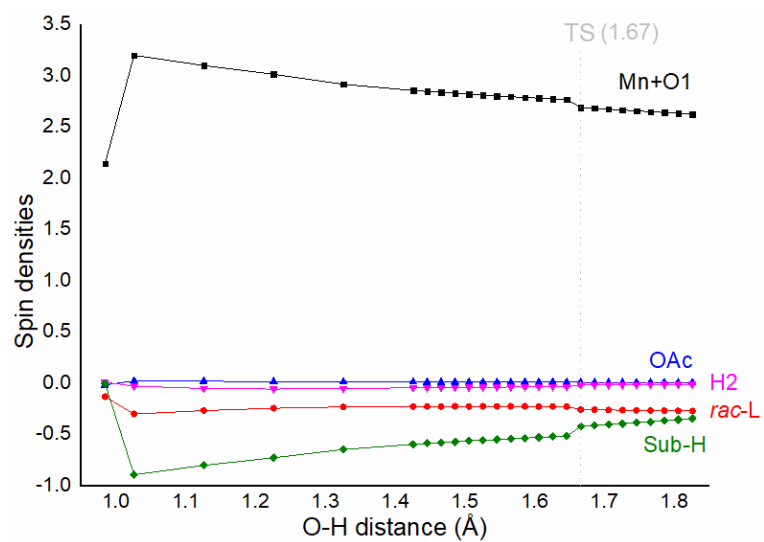

**Figure S10.** The plot of spin density variation of key moieties by the approach of oxo to the benzylic C-H group of PBA. Calculations were done at the UB3LYP-D3(BJ)/B1 level.

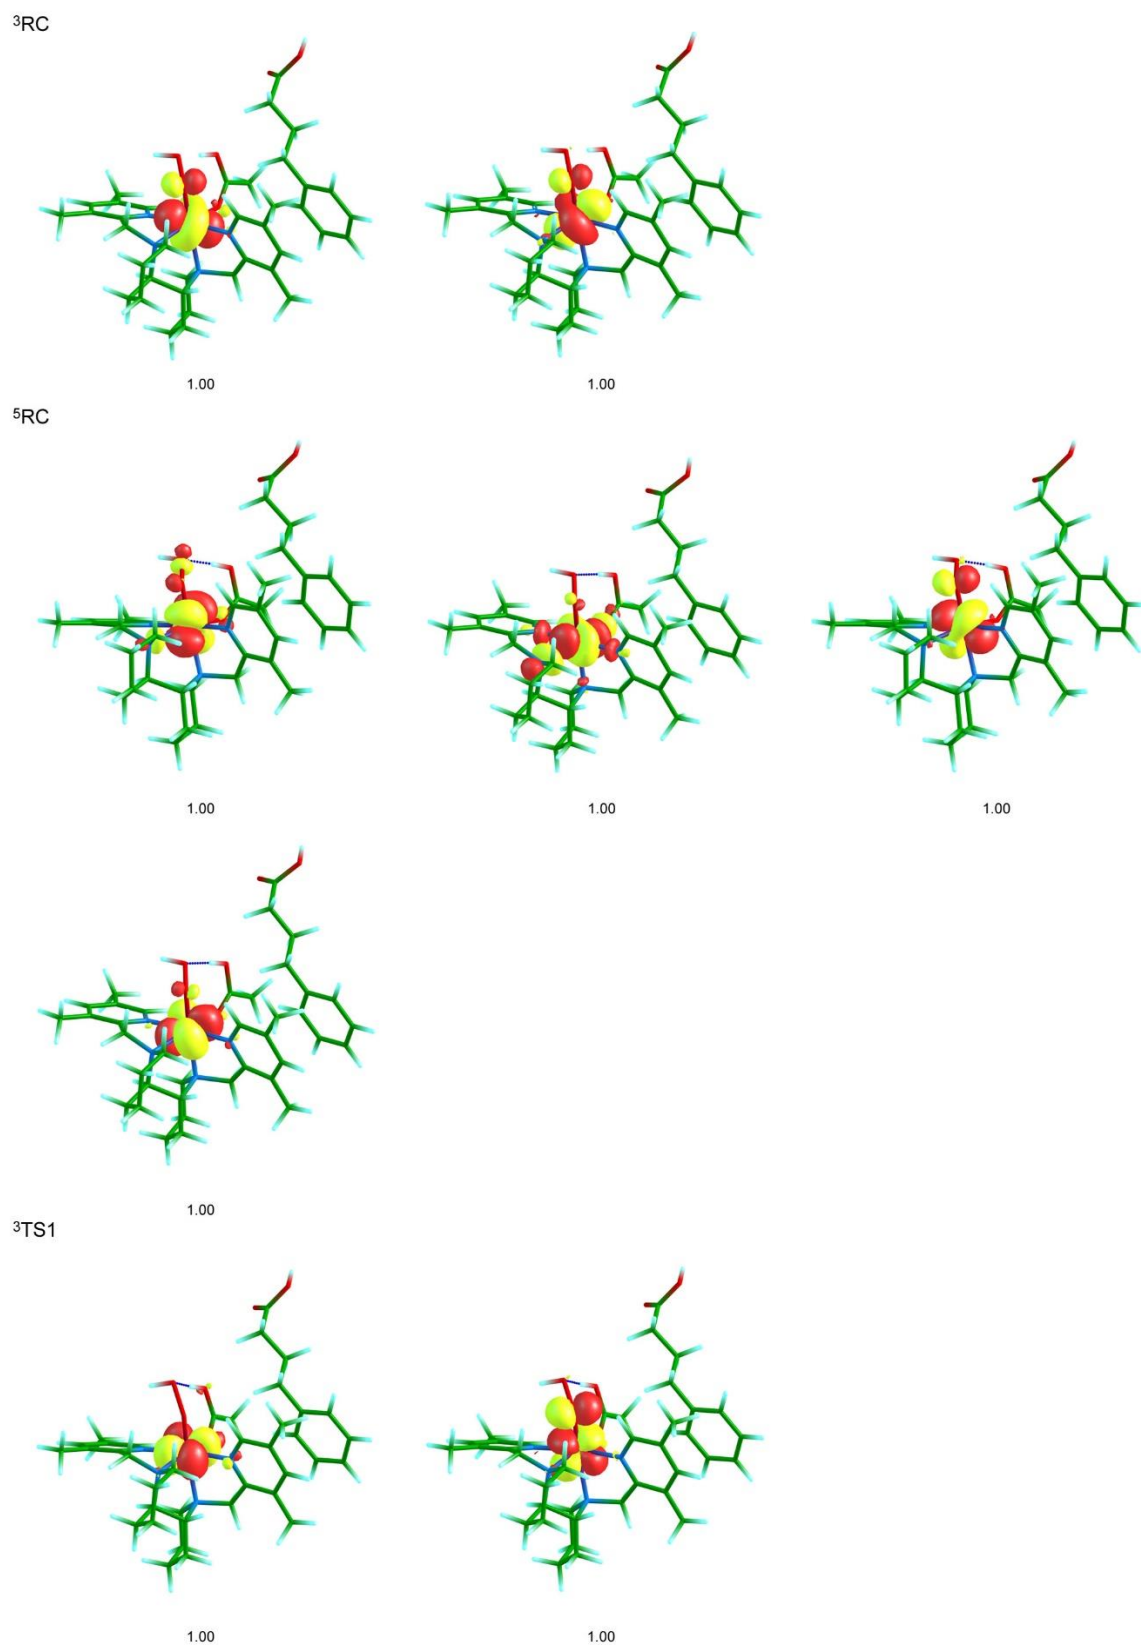

**Figure S11.** Singly-occupied natural orbitals (SNOs) of the hydroxylation of PBA by the high-valent Mn-oxo species **2** generated from the  $\text{Mn}^{\text{III}}\text{-OOH}$  species **1**. Calculations were done at the UB3LYP-D3(BJ)/B1 level in solvent. Positive values represent alpha-electron occupations. (To be continued)

<sup>5</sup>TS1

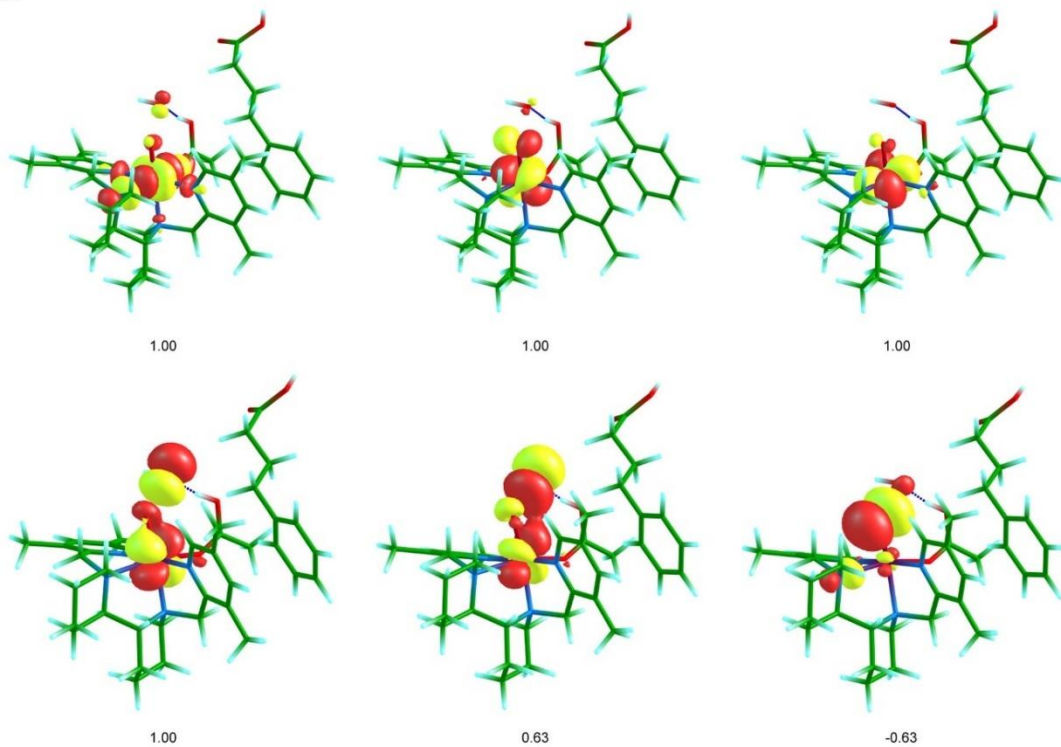

<sup>3</sup>IM1

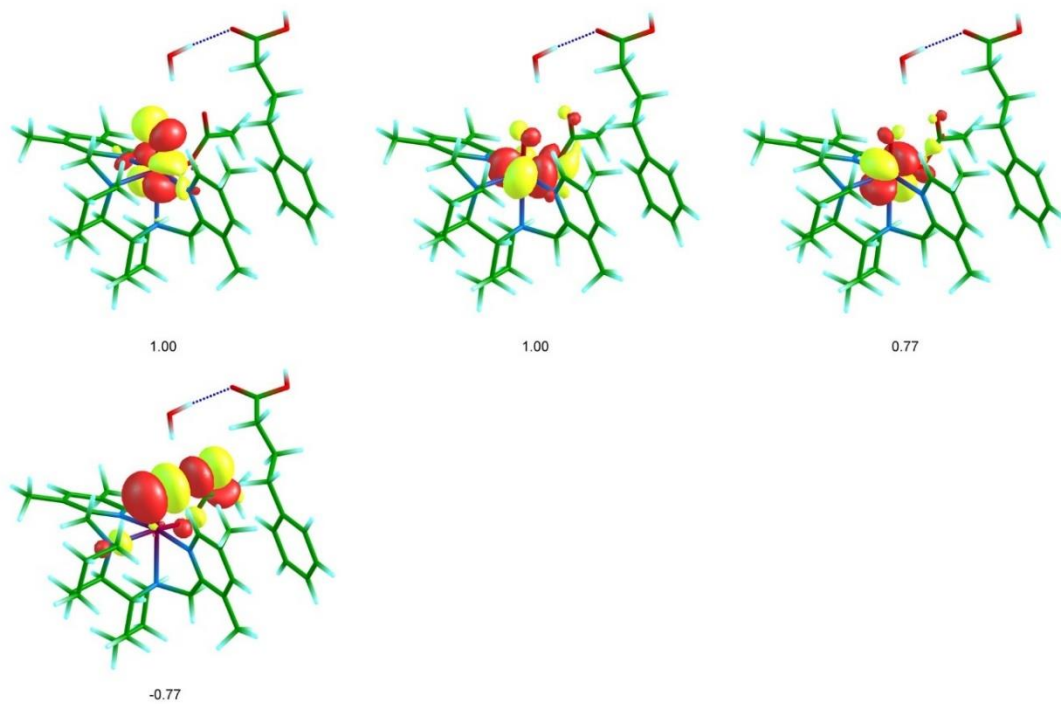

**Figure S11.** Singly-occupied natural orbitals (SNOs) of the hydroxylation of PBA by the high-valent Mn-oxo species **2** generated from the Mn<sup>III</sup>-OOH species **1**. Calculations were done at the UB3LYP-D3(BJ)/B1 level in solvent. Positive values represent alpha-electron occupations and negative ones represent beta occupations. (To be continued)



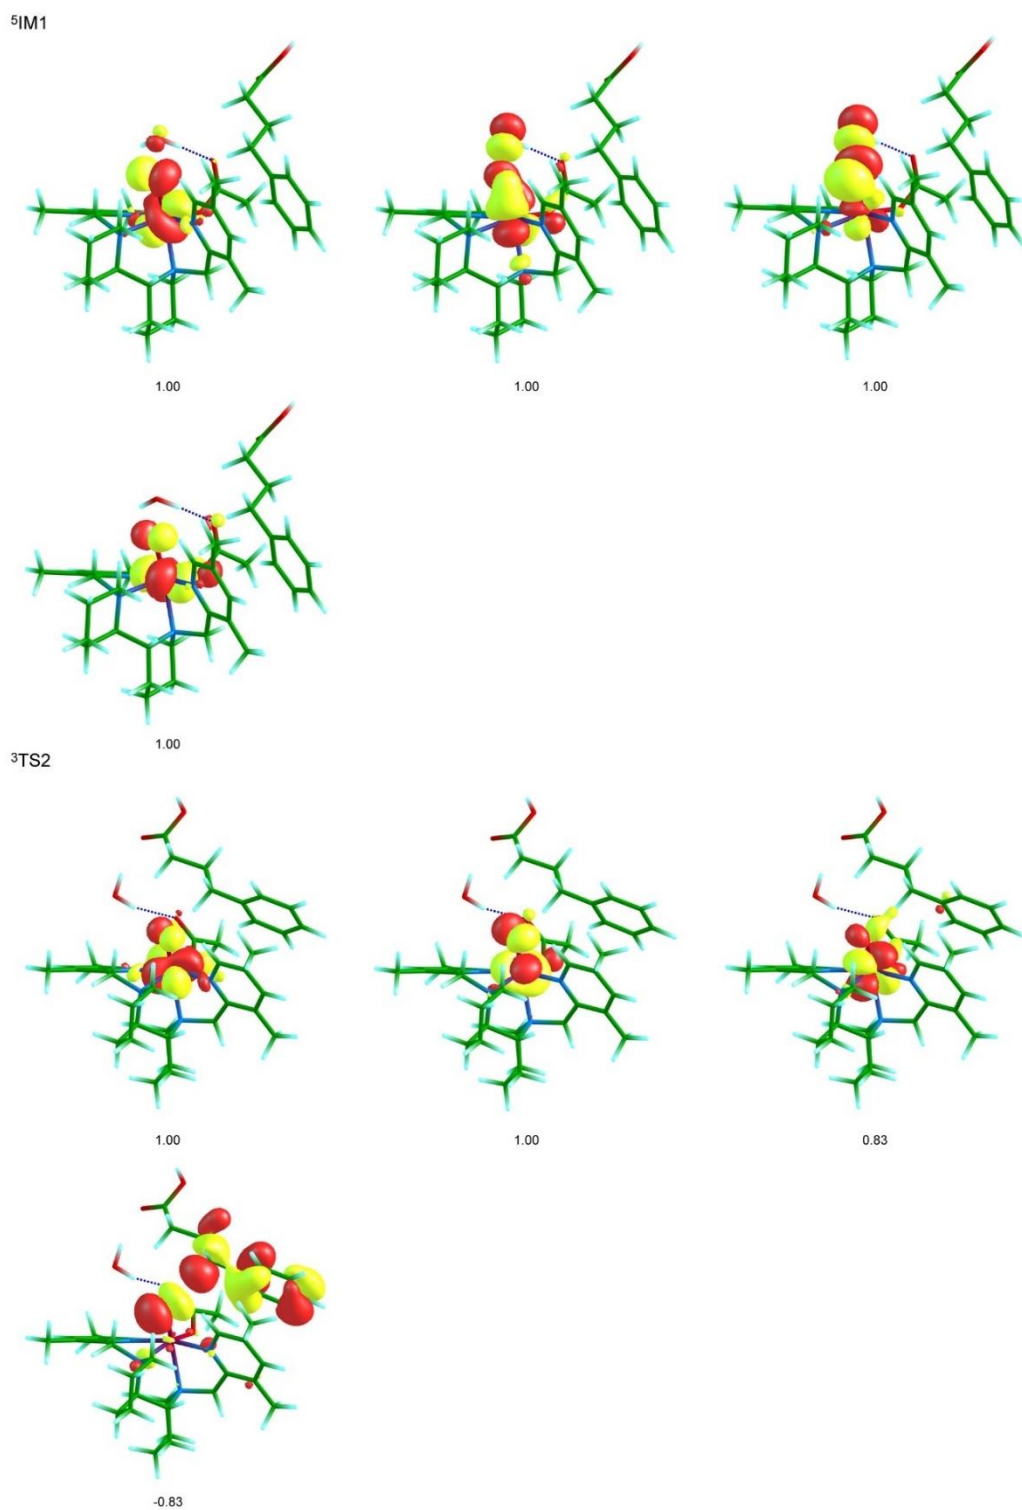

**Figure S11.** Singly-occupied natural orbitals (SNOs) of the hydroxylation of PBA by the high-valent Mn-oxo species **2** generated from the Mn<sup>III</sup>-OOH species **1**. Calculations were done at the UB3LYP-D3(BJ)/B1 level in solvent. Positive values represent alpha-electron occupations and negative ones represent beta occupations. (To be continued)

$^5\text{TS2}$

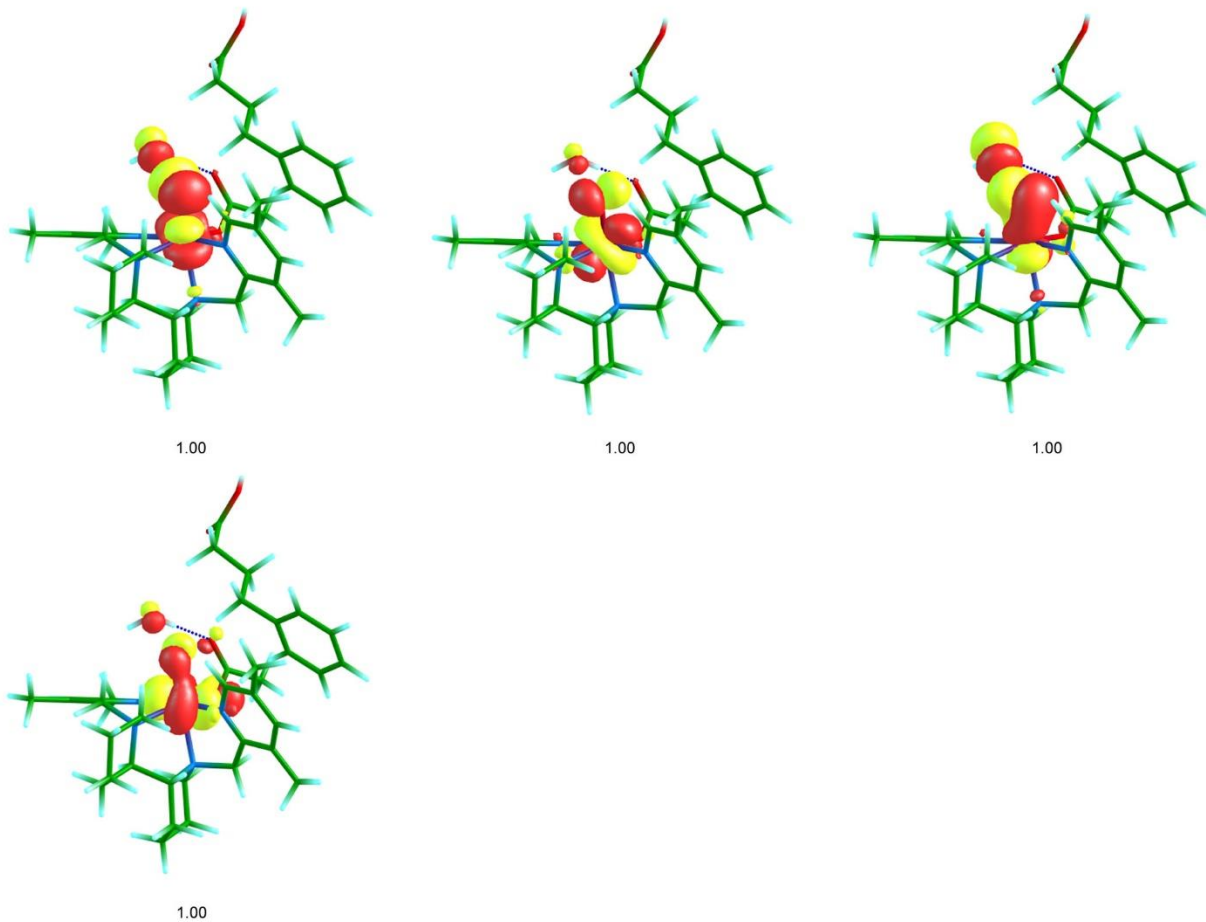

$^3\text{IM2}$

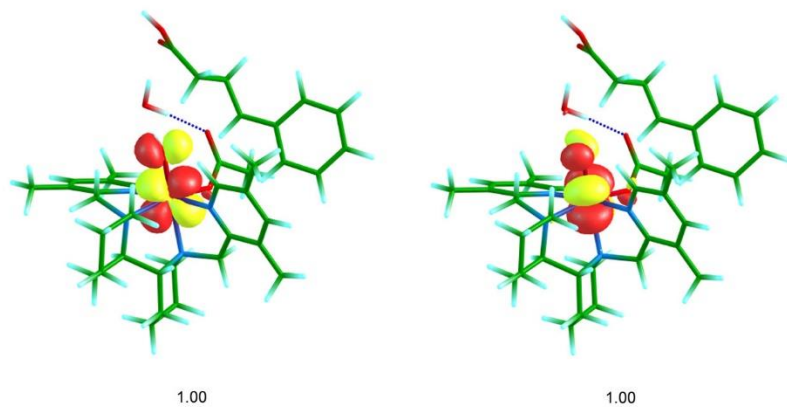

**Figure S11.** Singly-occupied natural orbitals (SNOs) of the hydroxylation of PBA by the high-valent Mn-oxo species **2** generated from the  $\text{Mn}^{\text{III}}$ -OOH species **1**. Calculations were done at the UB3LYP-D3(BJ)/B1 level in solvent. Positive values represent alpha-electron occupations. (To be continued)

$^5M2$

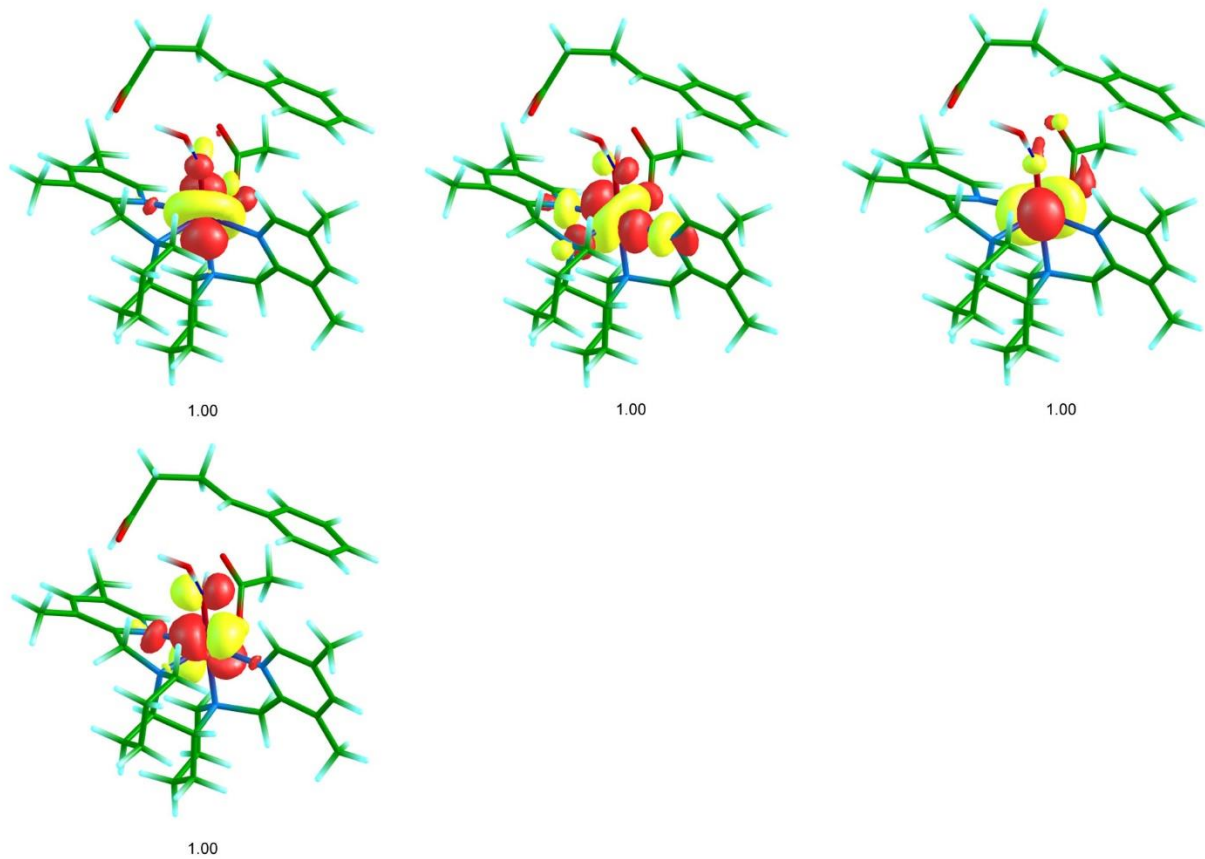

$^3TS3$

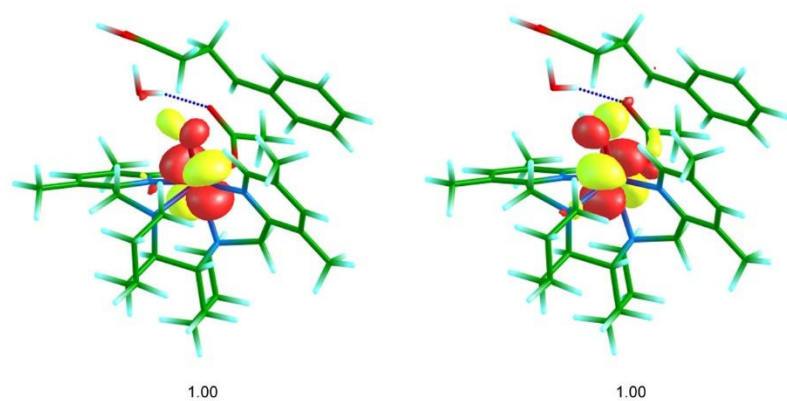

**Figure S11.** Singly-occupied natural orbitals (SNOs) of the hydroxylation of PBA by the high-valent Mn-oxo species **2** generated from the  $Mn^{III}$ -OOH species **1**. Calculations were done at the UB3LYP-D3(BJ)/B1 level in solvent. Positive values represent alpha-electron occupations. (To be continued)

<sup>5</sup>TS3

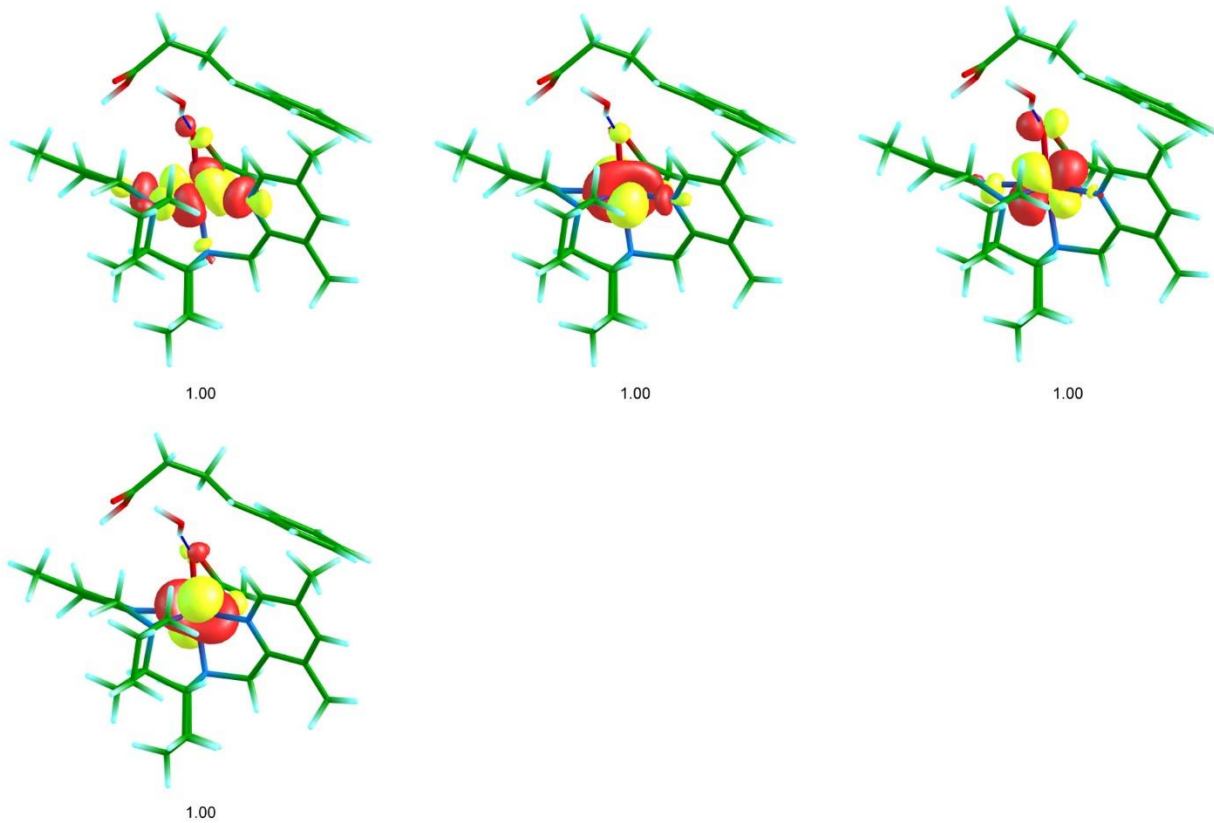

<sup>3</sup>PC

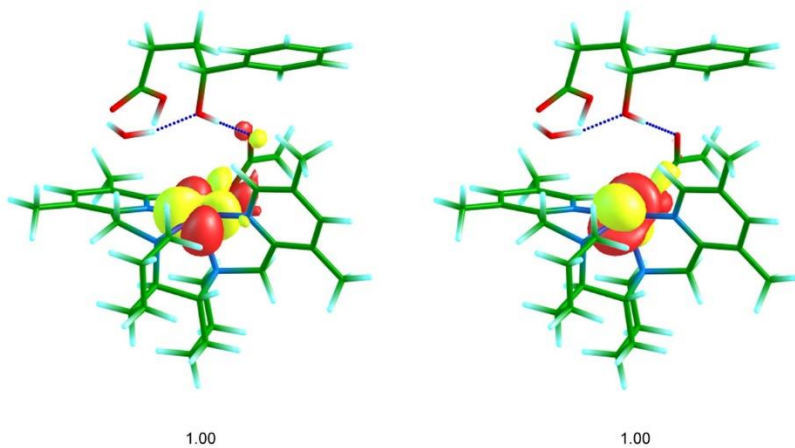

**Figure S11.** Singly-occupied natural orbitals (SNOs) of the hydroxylation of PBA by the high-valent Mn-oxo species **2** generated from the Mn<sup>III</sup>-OOH species **1**. Calculations were done at the UB3LYP-D3(BJ)/B1 level in solvent. Positive values represent alpha-electron occupations. (To be continued)

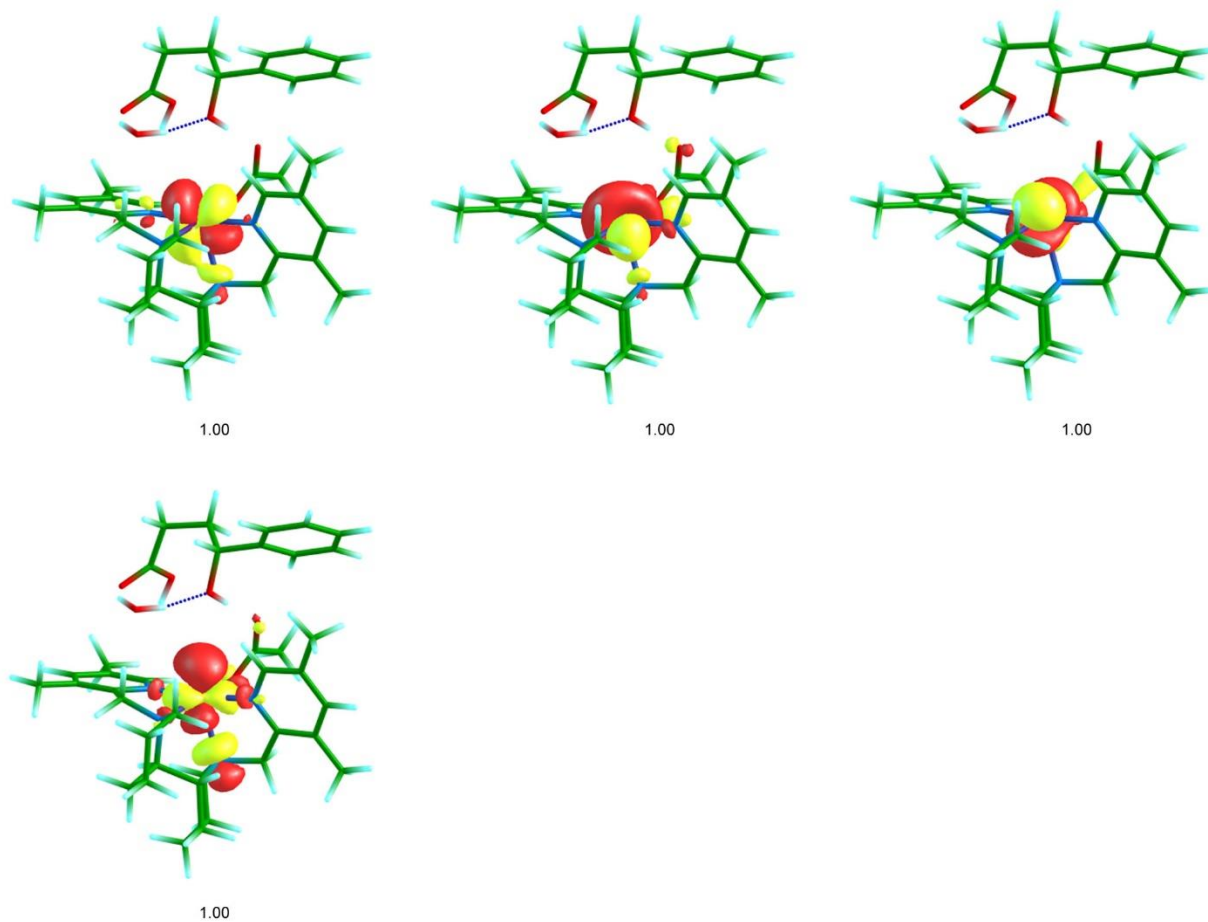

**Figure S11.** Singly-occupied natural orbitals (SNOs) of the hydroxylation of PBA by the high-valent Mn-oxo species **2** generated from the Mn<sup>III</sup>-OOH species **1**. Calculations were done at the UB3LYP-D3(BJ)/B1 level in solvent. Positive values represent alpha-electron occupations.

**Part IV Alcohol oxidation of 4-OH-PBA by the Mn<sup>IV</sup>(O)(AcO<sup>•</sup>) species **2** via the *gem*-diol mechanism.**

**Table S10.** Various SCF and Gibbs free energies of alcohol oxidation of 4-OH-PBA by **2** via the *gem*-diol mechanism. Calculations were done at the UB3LYP-D3(BJ)/B2//B1 level in solvent.

|                                       | OPT/B1+ZPE   | $\Delta E$   | SPE/B2+ZPE   | $\Delta E$   | $G$          | $\Delta G$   |
|---------------------------------------|--------------|--------------|--------------|--------------|--------------|--------------|
| <b><sup>3</sup>RC</b>                 | -3300.863742 | <b>0.0</b>   | -3301.392463 | <b>0.0</b>   | -3300.949328 | <b>0.0</b>   |
| <b><sup>5</sup>RC</b>                 | -3300.857928 | <b>3.6</b>   | -3301.379967 | <b>7.8</b>   | -3300.939823 | <b>6.0</b>   |
| <b><sup>3</sup>TS1</b>                | -3300.862878 | <b>0.5</b>   | -3301.389706 | <b>1.7</b>   | -3300.944997 | <b>2.7</b>   |
| <b><sup>5</sup>TS1</b>                | -3300.845133 | <b>11.7</b>  | -3301.371437 | <b>13.2</b>  | -3300.929341 | <b>12.5</b>  |
| <b><sup>3</sup>IM1</b>                | -3300.932137 | <b>-42.9</b> | -3301.458993 | <b>-41.7</b> | -3301.015303 | <b>-41.4</b> |
| <b><sup>5</sup>IM1</b>                | -3300.952417 | <b>-55.6</b> | -3301.478231 | <b>-53.8</b> | -3301.039626 | <b>-56.7</b> |
| <b><sup>3</sup>TS2<sub>diol</sub></b> | -3300.927375 | <b>-39.9</b> | -3301.453349 | <b>-38.2</b> | -3301.008789 | <b>-37.3</b> |
| <b><sup>5</sup>TS2<sub>diol</sub></b> | -3300.948727 | <b>-53.3</b> | -3301.473666 | <b>-51.0</b> | -3301.033785 | <b>-53.0</b> |
| <b><sup>3</sup>IM2<sub>diol</sub></b> | -3300.938713 | <b>-47.0</b> | -3301.463377 | <b>-44.5</b> | -3301.020528 | <b>-44.7</b> |
| <b><sup>5</sup>IM2<sub>diol</sub></b> | -3300.962970 | <b>-62.3</b> | -3301.486665 | <b>-59.1</b> | -3301.049922 | <b>-63.1</b> |
| <b><sup>3</sup>TS3</b>                | -3300.901737 | <b>-23.8</b> | -3301.425913 | <b>-21.0</b> | -3300.982946 | <b>-21.1</b> |
| <b><sup>5</sup>TS3</b>                | -3300.922845 | <b>-37.1</b> | -3301.446166 | <b>-33.7</b> | -3301.006091 | <b>-35.6</b> |
| <b><sup>3</sup>PC</b>                 | -3300.956424 | <b>-58.2</b> | -3301.483630 | <b>-57.2</b> | -3301.040678 | <b>-57.3</b> |
| <b><sup>5</sup>PC</b>                 | -3300.986079 | <b>-76.8</b> | -3301.511402 | <b>-74.6</b> | -3301.074082 | <b>-78.3</b> |

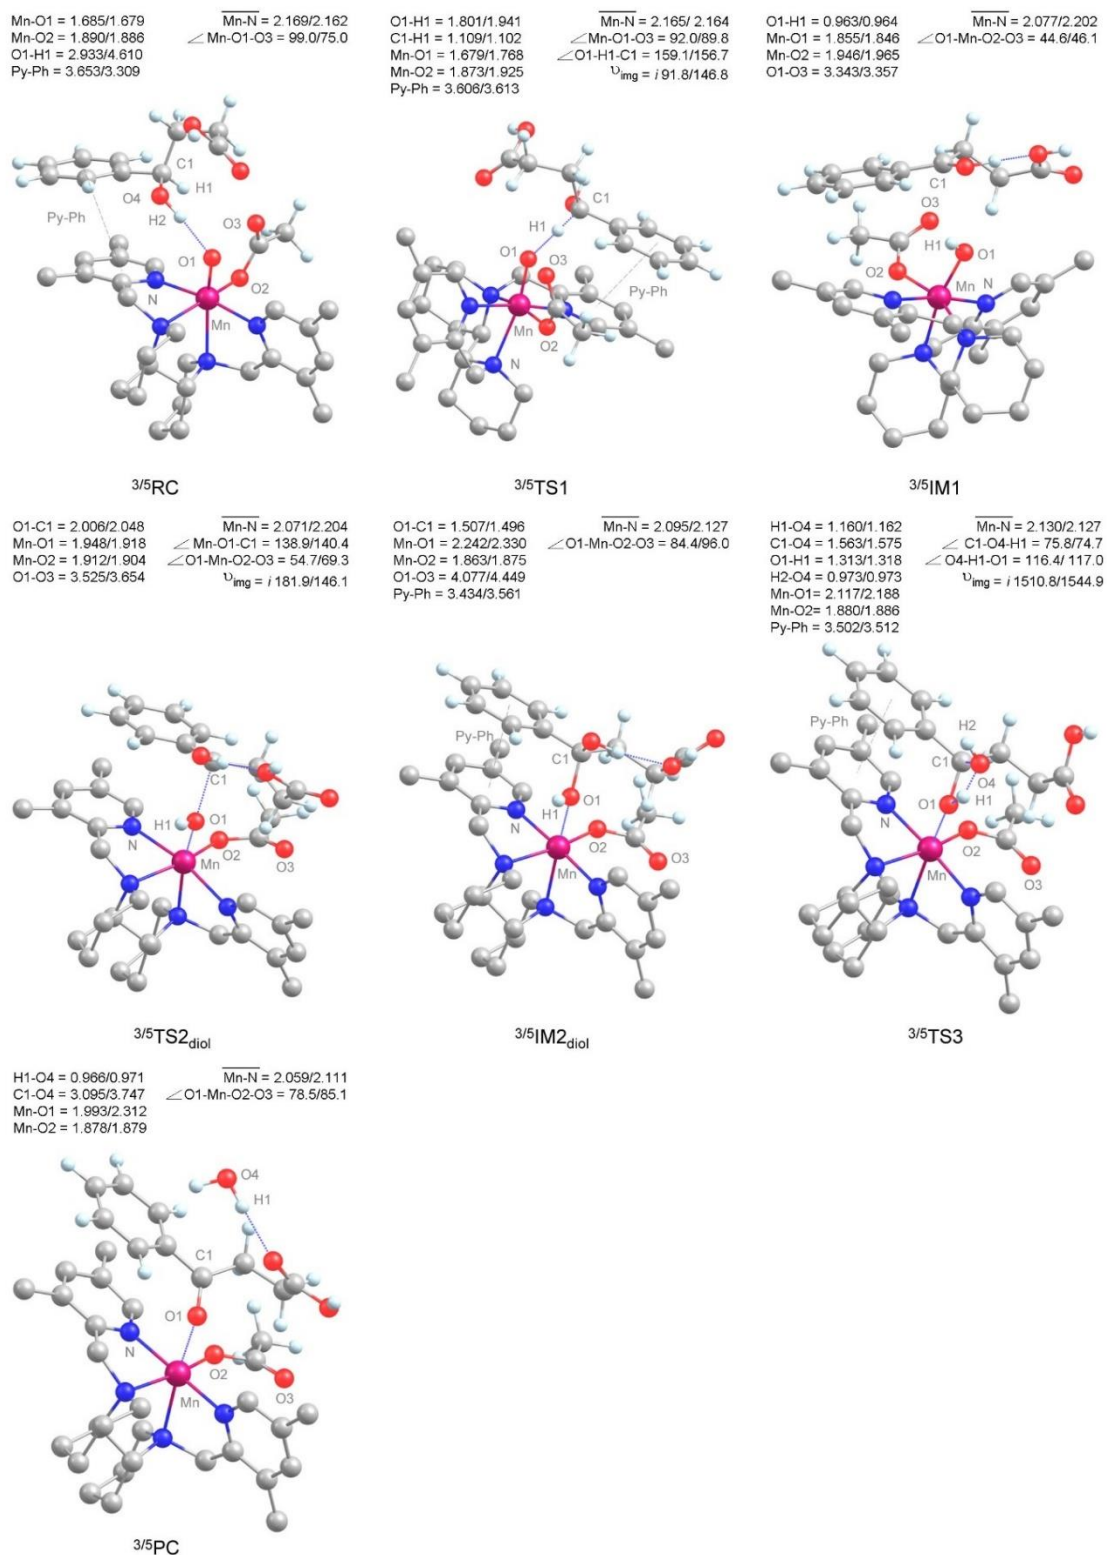

**Figure S12.** Optimized structures of the intermediates of alcohol oxidation of 4-OH-PBA by **2** via the *gem*-diol mechanism. Calculations were done at the UB3LYP-D3(BJ)/B1 level in solvent. Hydrogen atoms of *rac*-L are omitted for clarity. Lengths are in Å units, angles are in degree units and imaginary frequencies are in  $\text{cm}^{-1}$  units.

**Table S11.** Mulliken charges and spin densities of the intermediates of alcohol oxidation of 4-OH-PBA by **2** via the *gem*-diol mechanism. Calculations were done at the UB3LYP-D3(BJ)/B1 level.

|                                       | Mulliken charge |       |               |       |      |        | spin densities |       |               |       |      |        |
|---------------------------------------|-----------------|-------|---------------|-------|------|--------|----------------|-------|---------------|-------|------|--------|
|                                       | Mn              | O1    | <i>rac</i> -L | OAc   | H1   | Sub-H1 | Mn             | O1    | <i>rac</i> -L | OAc   | H1   | Sub-H1 |
| <b><sup>3</sup>RC</b>                 | 0.49            | -0.25 | 1.81          | -0.09 | 0.14 | -0.10  | 2.95           | -0.41 | -0.28         | -0.27 | 0.00 | 0.00   |
| <b><sup>5</sup>RC</b>                 | 0.63            | -0.57 | 1.77          | -0.37 | 0.14 | 0.40   | 2.71           | 0.44  | 0.23          | -0.01 | 0.00 | 0.63   |
| <b><sup>3</sup>TS1</b>                | 0.51            | -0.27 | 1.81          | -0.19 | 0.12 | 0.01   | 2.97           | -0.45 | -0.28         | -0.12 | 0.00 | -0.12  |
| <b><sup>5</sup>TS1</b>                | 0.54            | -0.32 | 1.75          | -0.13 | 0.13 | 0.03   | 3.04           | 0.81  | -0.26         | 0.26  | 0.00 | 0.16   |
| <b><sup>3</sup>IM1</b>                | 0.66            | -0.70 | 1.29          | -0.55 | 0.32 | 0.97   | 2.09           | 0.05  | -0.15         | -0.01 | 0.01 | 0.00   |
| <b><sup>5</sup>IM1</b>                | 0.91            | -0.69 | 1.04          | -0.56 | 0.32 | 0.97   | 3.97           | 0.00  | 0.00          | 0.02  | 0.01 | 0.00   |
| <b><sup>3</sup>TS2<sub>diol</sub></b> | 0.67            | -0.62 | 1.43          | -0.49 | 0.32 | 0.69   | 2.13           | 0.00  | -0.16         | 0.01  | 0.00 | 0.02   |
| <b><sup>5</sup>TS2<sub>diol</sub></b> | 0.95            | -0.70 | 1.13          | -0.48 | 0.34 | 0.75   | 3.99           | 0.01  | -0.02         | 0.01  | 0.00 | 0.01   |
| <b><sup>3</sup>IM2<sub>diol</sub></b> | 0.71            | -0.50 | 1.55          | -0.43 | 0.35 | 0.31   | 2.14           | -0.01 | -0.18         | 0.05  | 0.00 | 0.00   |
| <b><sup>5</sup>IM2<sub>diol</sub></b> | 0.85            | -0.52 | 1.45          | -0.44 | 0.35 | 0.31   | 4.02           | 0.01  | -0.06         | 0.02  | 0.00 | 0.01   |
| <b><sup>3</sup>TS3</b>                | 0.74            | -0.56 | 1.44          | -0.45 | 0.42 | 0.41   | 2.15           | -0.01 | -0.18         | 0.04  | 0.00 | 0.00   |
| <b><sup>5</sup>TS3</b>                | 0.86            | -0.59 | 1.38          | -0.46 | 0.42 | 0.39   | 4.01           | 0.03  | -0.07         | 0.01  | 0.00 | 0.01   |
| <b><sup>3</sup>PC</b>                 | 0.60            | -0.38 | 1.56          | -0.45 | 0.35 | 0.32   | 2.13           | 0.00  | -0.16         | 0.04  | 0.00 | -0.01  |
| <b><sup>5</sup>PC</b>                 | 0.79            | -0.44 | 1.48          | -0.43 | 0.34 | 0.25   | 4.01           | -0.01 | -0.06         | 0.02  | 0.00 | 0.04   |



**Table S12.** The spin density variation of key moieties by the approach of the oxo to the benzylic C-H group of 4-OH-PBA.  $d_{\text{OH}}$  denotes the distance between the oxo and the benzylic hydrogen, Lengths are in Å units.

| $d_{\text{OH}}$ | spin densities |       |               |       |       |        |
|-----------------|----------------|-------|---------------|-------|-------|--------|
|                 | Mn             | O1    | <i>rac</i> -L | OAc   | H1    | Sub-H1 |
| 1.98            | 2.96           | -0.42 | -0.28         | -0.27 | 0.00  | 0.00   |
| 1.93            | 2.97           | -0.42 | -0.28         | -0.26 | 0.00  | 0.00   |
| 1.88            | 2.97           | -0.43 | -0.28         | -0.25 | 0.00  | -0.02  |
| 1.87            | 2.97           | -0.43 | -0.28         | -0.24 | 0.00  | -0.02  |
| 1.86            | 2.97           | -0.43 | -0.28         | -0.24 | 0.00  | -0.02  |
| 1.85            | 2.97           | -0.44 | -0.28         | -0.23 | 0.00  | -0.03  |
| 1.84            | 2.98           | -0.44 | -0.28         | -0.22 | 0.00  | -0.04  |
| 1.83            | 2.98           | -0.44 | -0.28         | -0.21 | 0.00  | -0.04  |
| 1.82            | 2.98           | -0.44 | -0.28         | -0.21 | 0.00  | -0.05  |
| 1.81            | 2.97           | -0.45 | -0.28         | -0.17 | 0.00  | -0.08  |
| 1.80            | 2.86           | -0.18 | -0.22         | 0.00  | -0.04 | -0.42  |
| 1.79            | 2.86           | -0.18 | -0.22         | 0.00  | -0.04 | -0.42  |
| 1.78            | 2.86           | -0.17 | -0.22         | 0.00  | -0.04 | -0.43  |
| 1.77            | 2.86           | -0.17 | -0.22         | 0.00  | -0.04 | -0.43  |
| 1.76            | 2.86           | -0.17 | -0.22         | 0.00  | -0.04 | -0.44  |
| 1.75            | 2.86           | -0.16 | -0.21         | 0.00  | -0.04 | -0.44  |
| 1.74            | 2.86           | -0.16 | -0.21         | 0.00  | -0.04 | -0.45  |
| 1.73            | 2.86           | -0.16 | -0.21         | 0.00  | -0.04 | -0.45  |
| 1.72            | 2.86           | -0.15 | -0.21         | 0.00  | -0.04 | -0.46  |
| 1.71            | 2.86           | -0.15 | -0.21         | 0.00  | -0.04 | -0.46  |
| 1.70            | 2.87           | -0.14 | -0.21         | 0.00  | -0.04 | -0.47  |
| 1.69            | 2.87           | -0.14 | -0.21         | 0.00  | -0.04 | -0.47  |
| 1.68            | 2.87           | -0.14 | -0.21         | 0.00  | -0.04 | -0.47  |
| 1.67            | 2.87           | -0.14 | -0.21         | 0.00  | -0.05 | -0.48  |
| 1.62            | 2.87           | -0.12 | -0.21         | 0.00  | -0.05 | -0.50  |
| 1.57            | 2.84           | -0.12 | -0.19         | 0.01  | -0.05 | -0.49  |
| 1.52            | 2.84           | -0.10 | -0.19         | 0.01  | -0.05 | -0.52  |
| 1.47            | 2.84           | -0.07 | -0.19         | 0.01  | -0.05 | -0.54  |
| 1.42            | 2.84           | -0.04 | -0.19         | 0.01  | -0.06 | -0.56  |
| 1.37            | 2.84           | -0.01 | -0.19         | 0.01  | -0.06 | -0.59  |
| 1.32            | 2.84           | 0.02  | -0.19         | 0.01  | -0.07 | -0.62  |
| 1.27            | 2.84           | 0.06  | -0.19         | 0.01  | -0.07 | -0.65  |
| 1.22            | 2.83           | 0.09  | -0.19         | 0.01  | -0.07 | -0.67  |
| 1.17            | 2.80           | 0.11  | -0.19         | 0.01  | -0.07 | -0.66  |
| 1.12            | 2.10           | 0.04  | -0.15         | 0.01  | 0.01  | 0.00   |
| 1.07            | 2.10           | 0.04  | -0.15         | 0.01  | 0.01  | 0.00   |
| 1.02            | 2.10           | 0.04  | -0.15         | 0.01  | 0.01  | 0.00   |

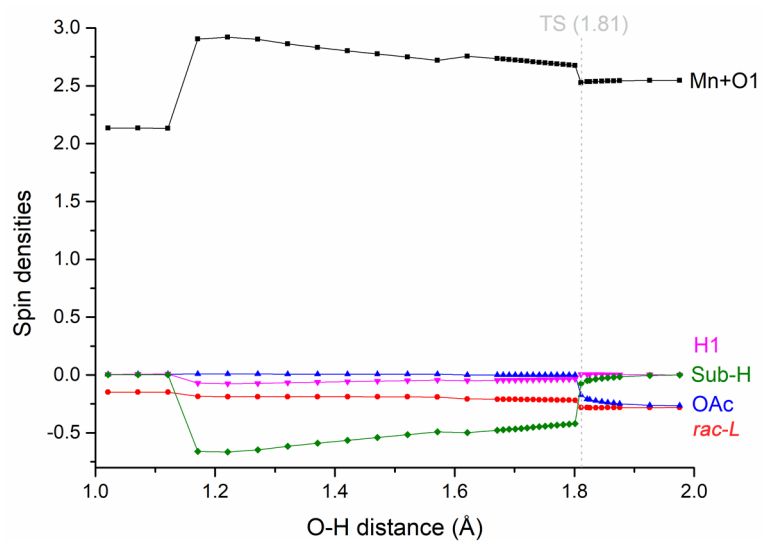

**Figure S13.** The plot of the spin density variation of key moieties by the approach of the oxo to the benzylic C-H group of 4-OH-PBA. Calculations were done at the UB3LYP-D3(BJ)/B1 level.

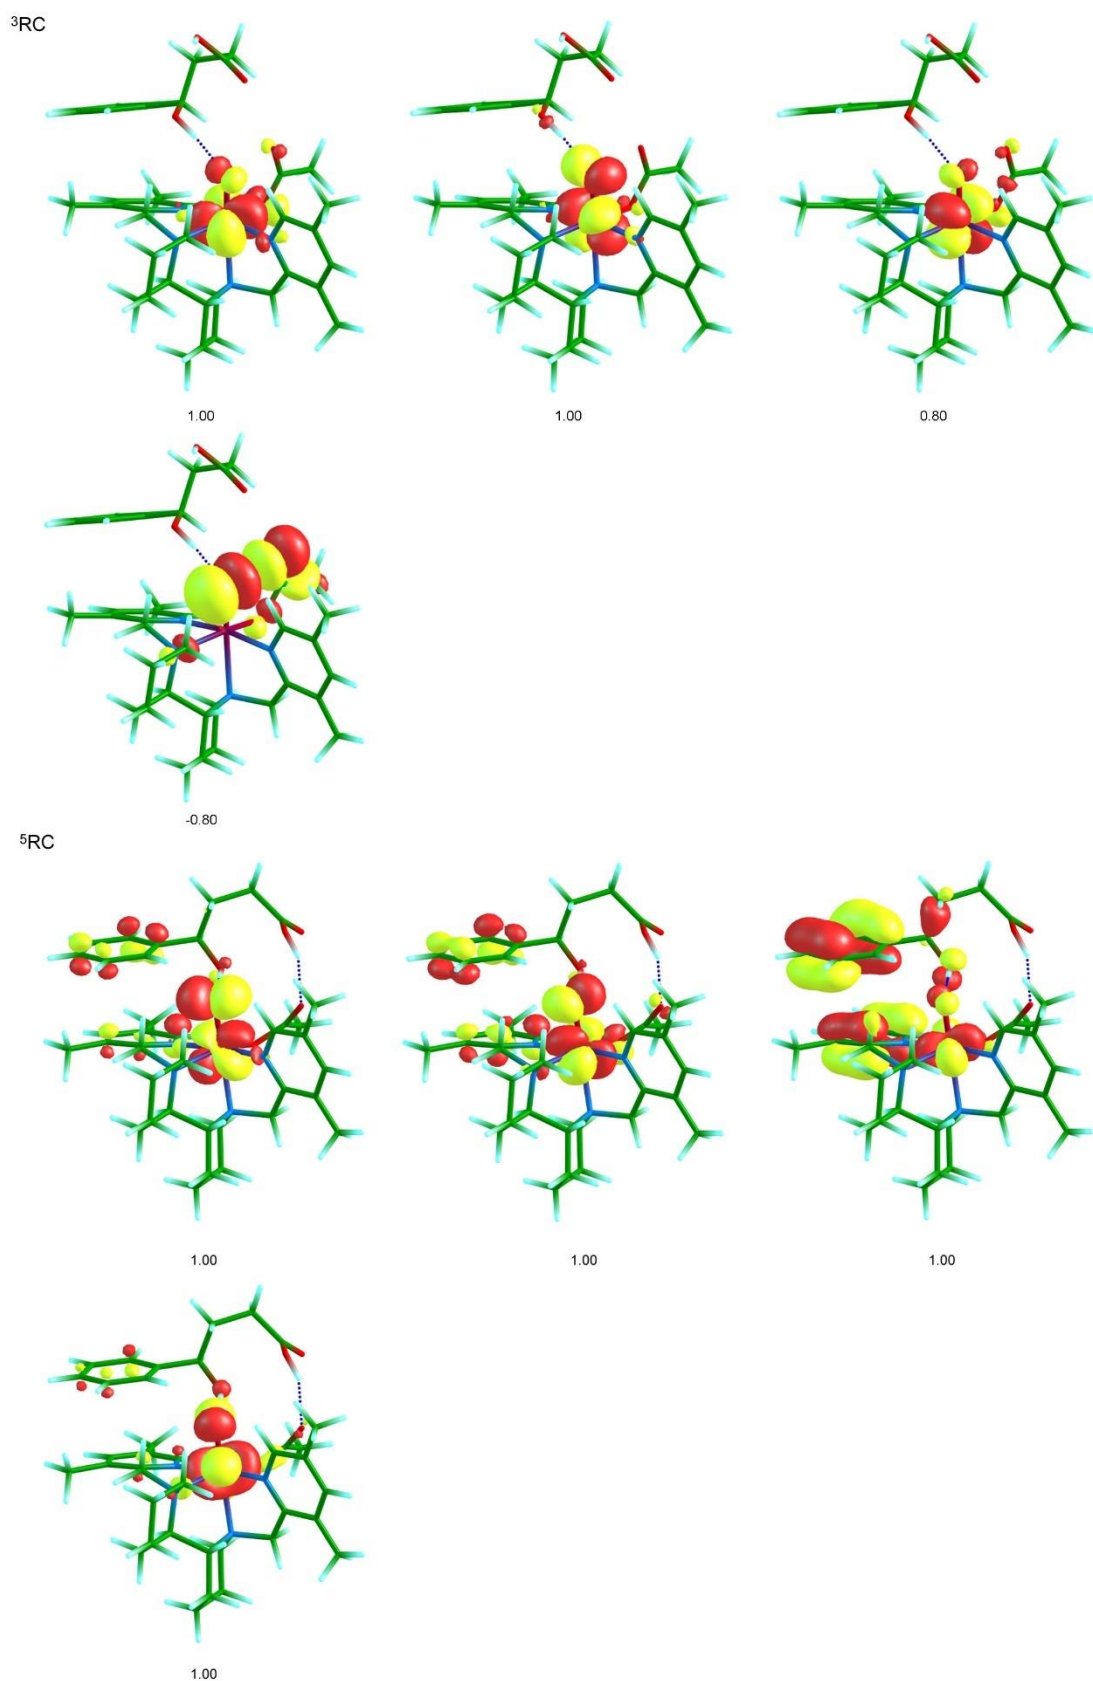

**Figure S14.** Singly-occupied natural orbitals (SNOs) of key moieties by the approach of the oxo to the benzylic C-H group of 4-OH-PBA. Calculations were done at the UB3LYP-D3(BJ)/B1 level in solvent. Positive values represent alpha-electron occupations and netative ones represent beta occupations. (To be continued)

<sup>3</sup>TS1

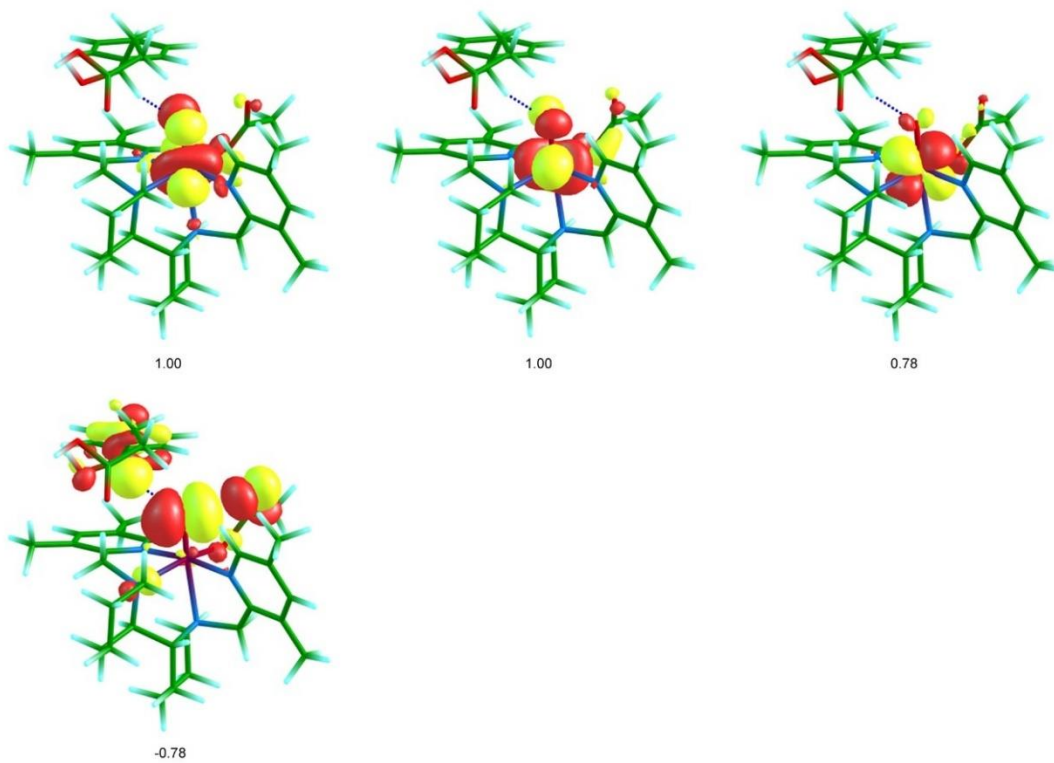

<sup>5</sup>TS1

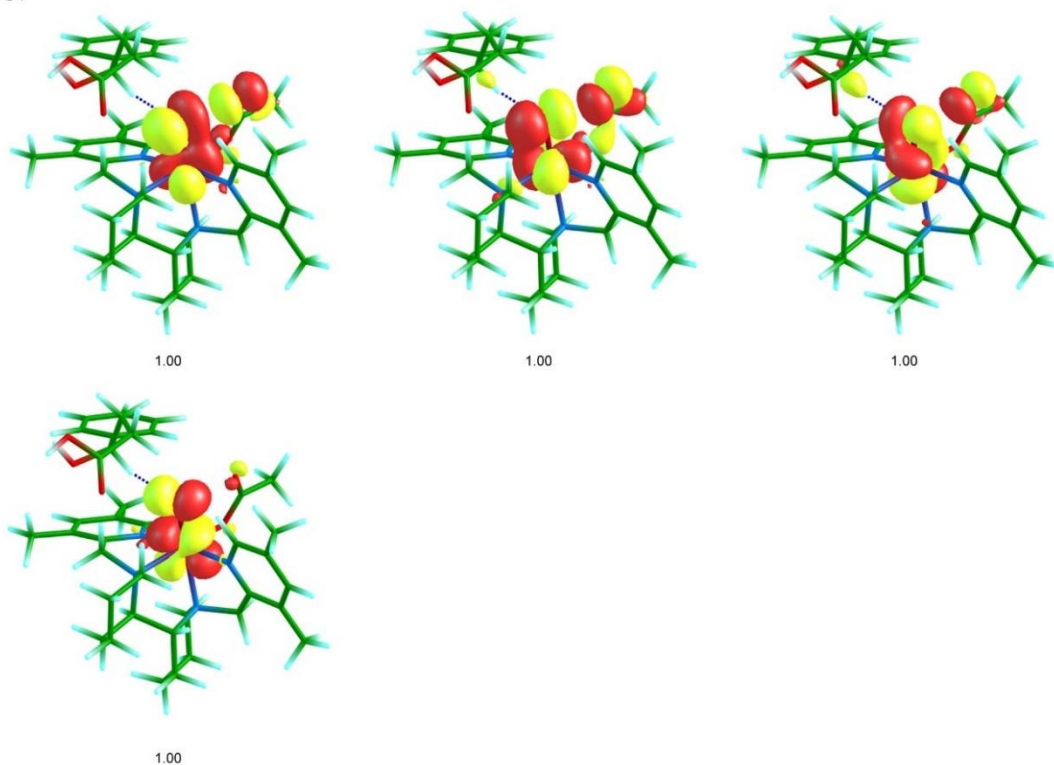

**Figure S14.** Singly-occupied natural orbitals (SNOs) of key moieties by the approach of the oxo to the benzylic C-H group of 4-OH-PBA. Calculations were done at the UB3LYP-D3(BJ)/B1 level in solvent. Positive and negative values represent alpha and netative ones represent beta occupations. (To be continued)

$^3IM1$

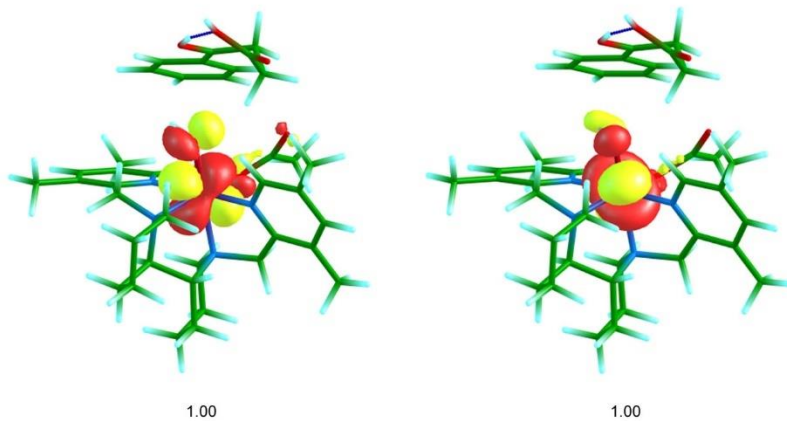

$^5IM1$

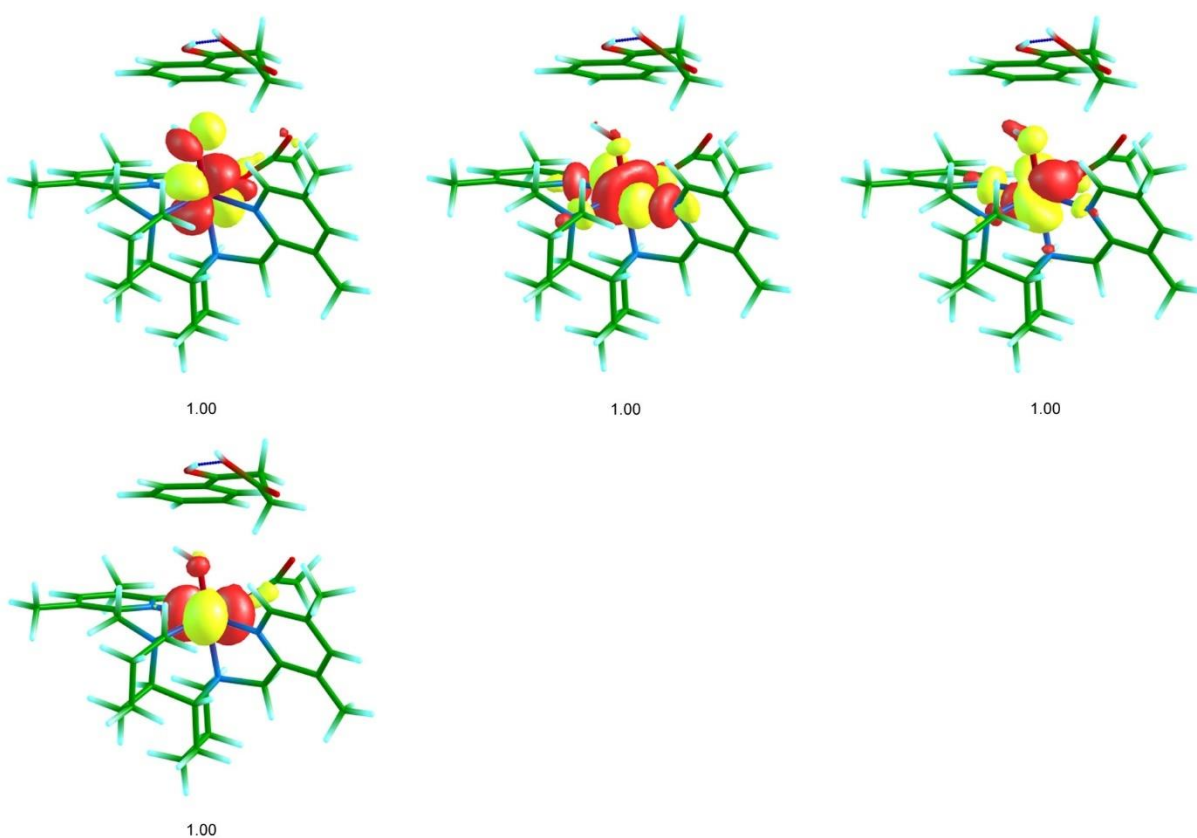

**Figure S14.** Singly-occupied natural orbitals (SNOs) of key moieties by the approach of the oxo to the benzylic C-H group of 4-OH-PBA. Calculations were done at the UB3LYP-D3(BJ)/B1 level in solvent. Positive values represent alpha-electron occupations. (To be continued)

${}^3\text{TS2}_{\text{diol}}$

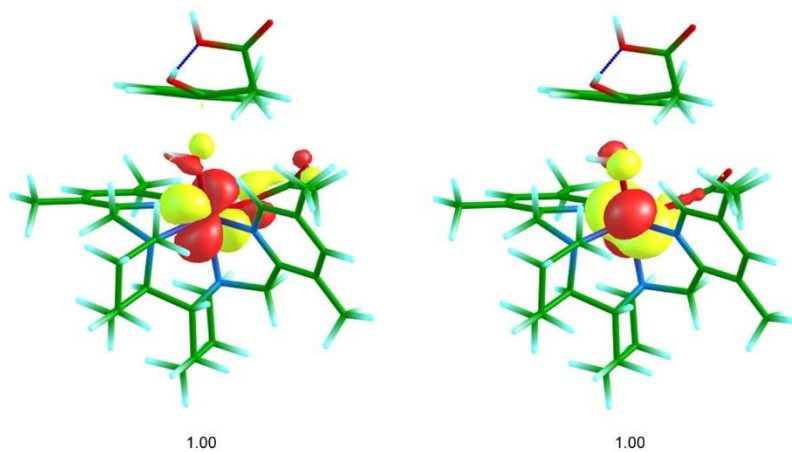

${}^5\text{TS2}_{\text{diol}}$

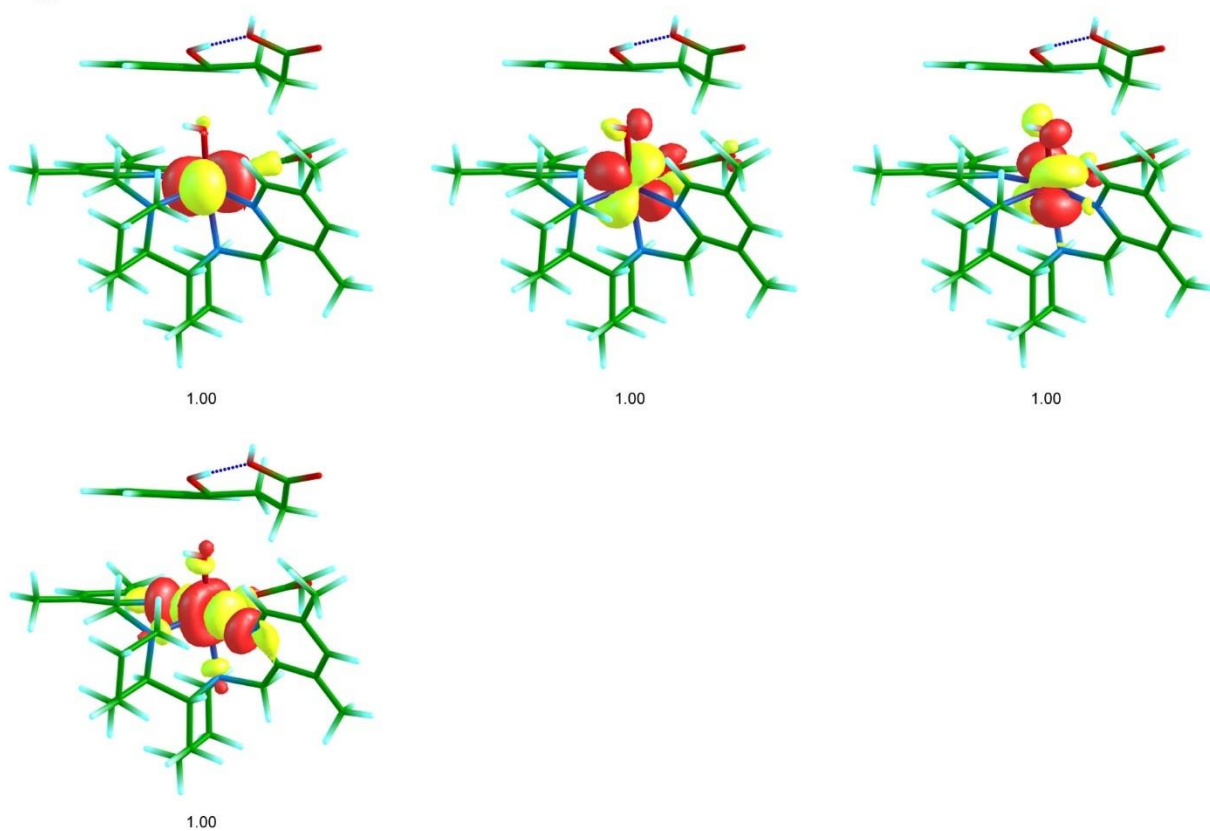

**Figure S14.** Singly-occupied natural orbitals (SNOs) of key moieties by the approach of the oxo to the benzylic C-H group of 4-OH-PBA. Calculations were done at the UB3LYP-D3(BJ)/B1 level in solvent. Positive values represent alpha-electron occupations. (To be continued)

${}^3\text{IM2}_{\text{diol}}$

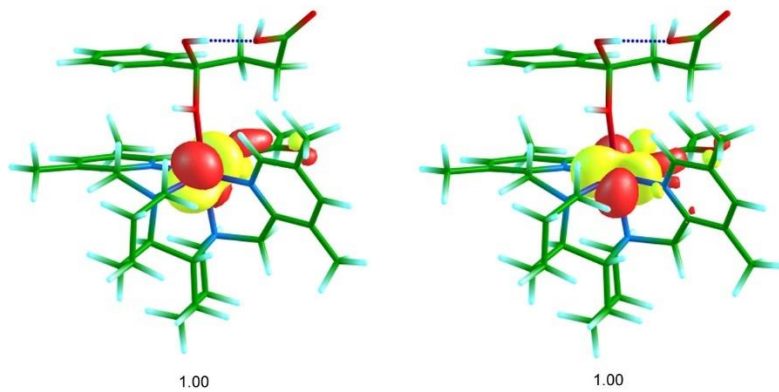

${}^5\text{IM2}_{\text{diol}}$

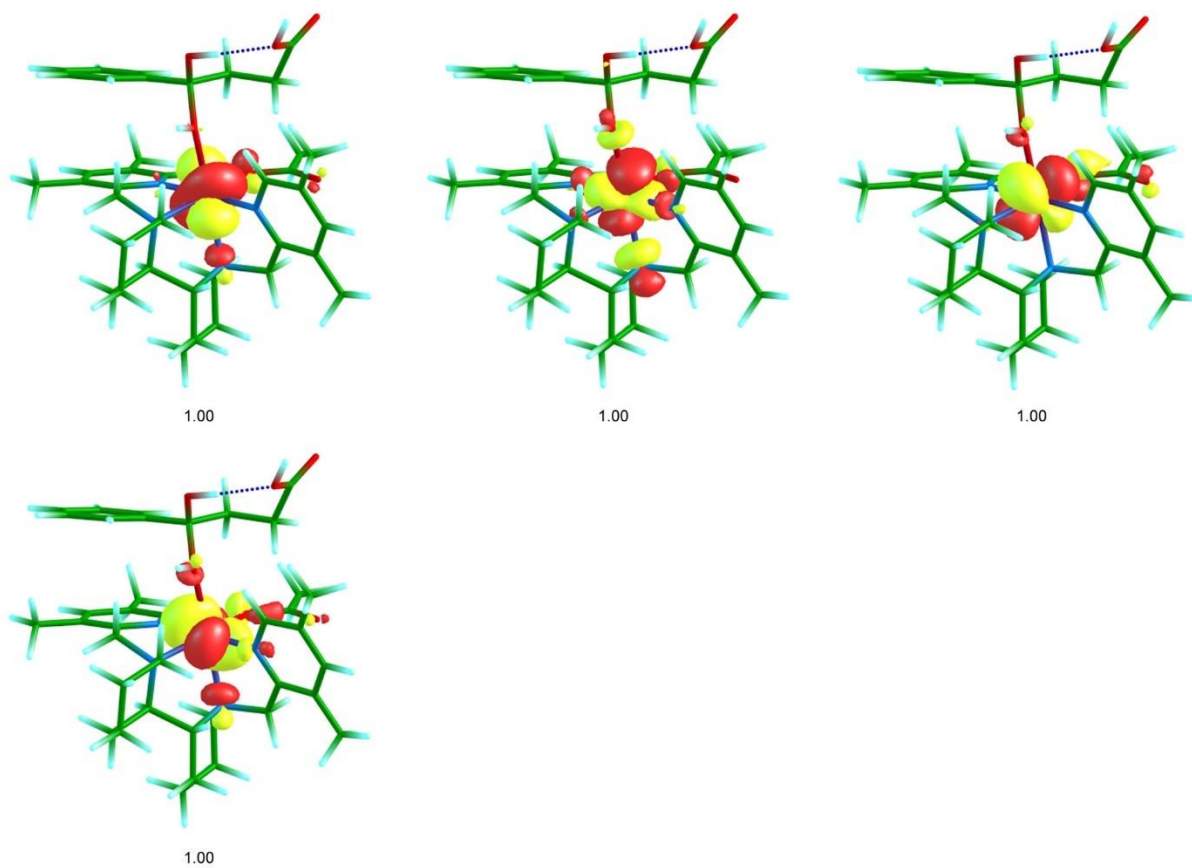

**Figure S14.** Singly-occupied natural orbitals (SNOs) of key moieties by the approach of the oxo to the benzylic C-H group of 4-OH-PBA. Calculations were done at the UB3LYP-D3(BJ)/B1 level in solvent. Positive values represent alpha-electron occupations. (To be continued)

<sup>3</sup>TS3

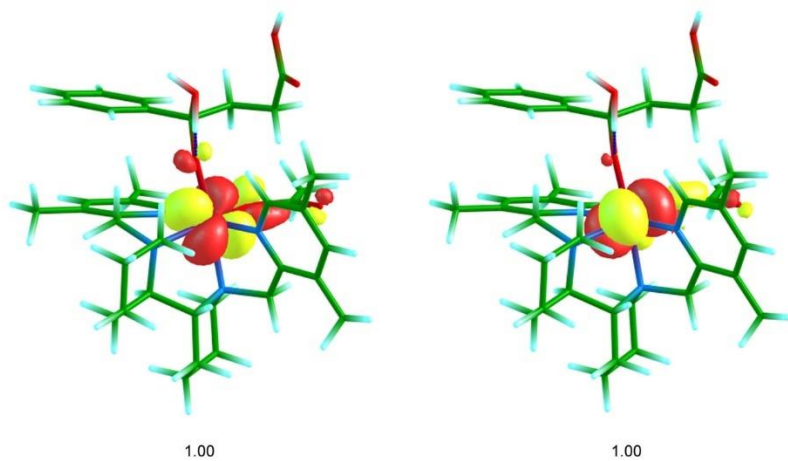

<sup>5</sup>TS3

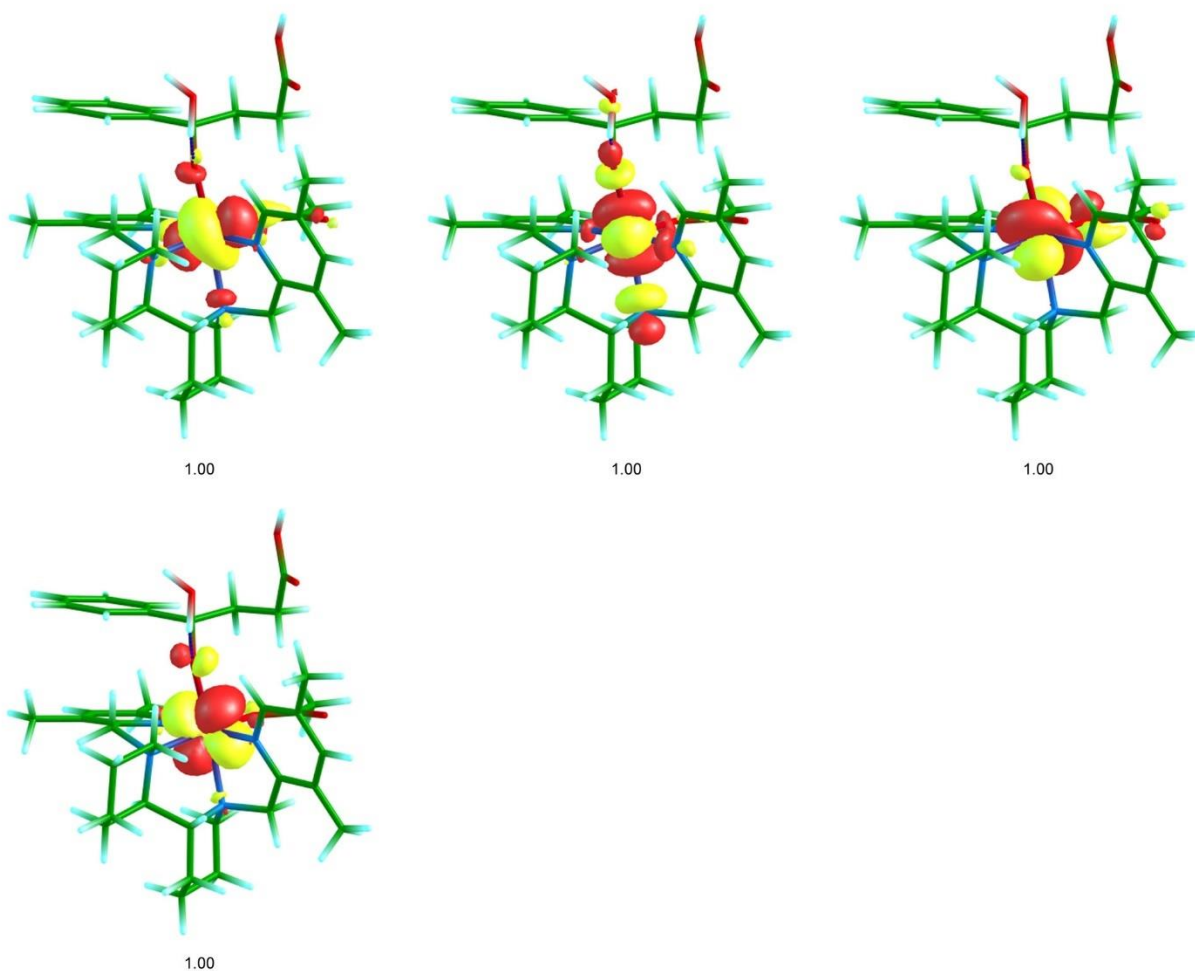

**Figure S14.** Singly-occupied natural orbitals (SNOs) of key moieties by the approach of the oxo to the benzylic C-H group of 4-OH-PBA. Calculations were done at the UB3LYP-D3(BJ)/B1 level in solvent. Positive values represent alpha-electron occupations. (To be continued)



<sup>3</sup>PC

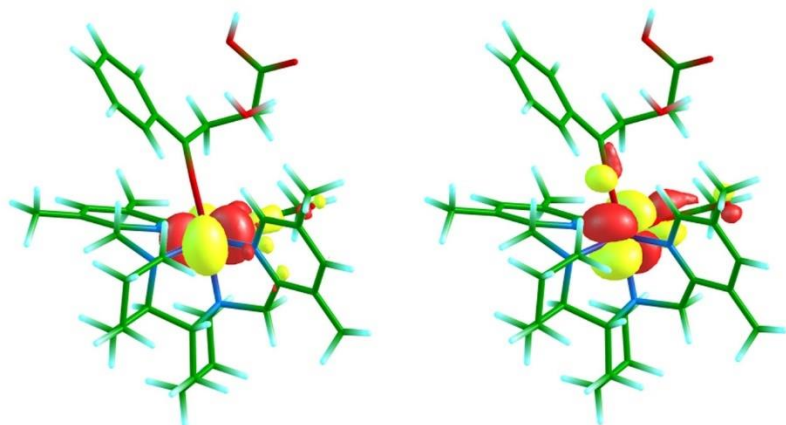

1.00

1.00

<sup>5</sup>PC

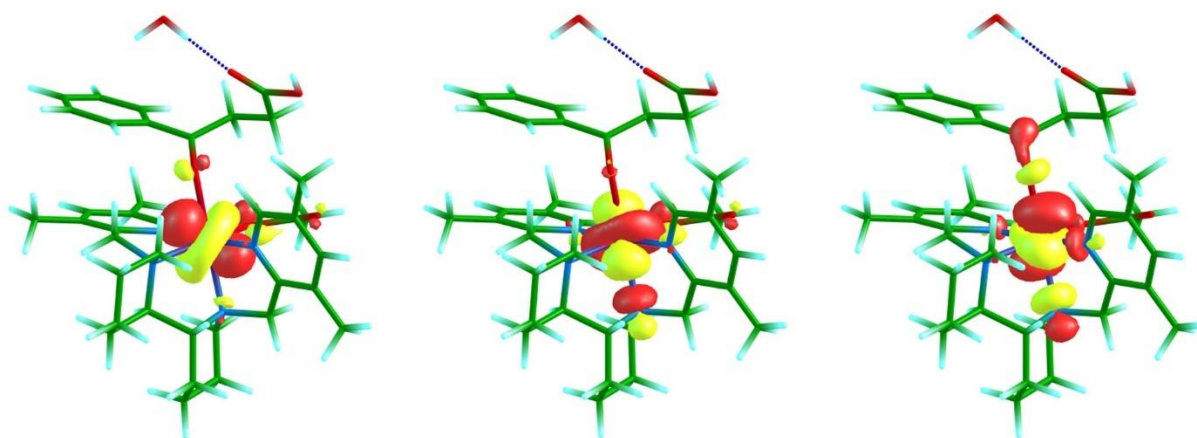

1.00

1.00

1.00

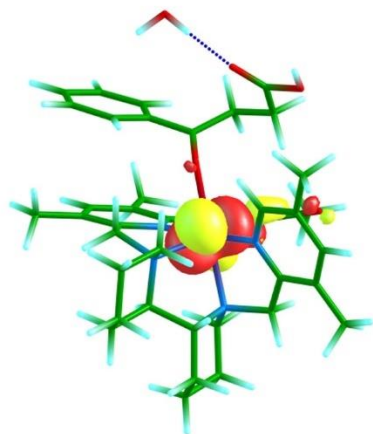

1.00

**Figure S14.** Singly-occupied natural orbitals (SNOs) of key moieties by the approach of the oxo to the benzylic C-H group of 4-OH-PBA. Calculations were done at the UB3LYP-D3(BJ)/B1 level in solvent. Positive values represent alpha-electron occupations.

**Table S13.** Various SCF and Gibbs free energies of the water-assisted dehydration of the *gem*-diol complex. Calculations were done at the UB3LYP-D3(BJ)/B2//B1 level in solvent.

| <b>1. without water</b> |             |             |             |              |             |              |
|-------------------------|-------------|-------------|-------------|--------------|-------------|--------------|
|                         | OPT/B1+ZPE  | $\Delta E$  | SPE/B2+ZPE  | $\Delta E$   | $G$         | $\Delta G$   |
| <b>RC<sub>0</sub></b>   | -689.194258 | <b>0.0</b>  | -689.345546 | <b>0.0</b>   | -689.235452 | <b>0.0</b>   |
| <b>TS<sub>0</sub></b>   | -689.139326 | <b>34.5</b> | -689.290366 | <b>34.6</b>  | -689.180384 | <b>34.6</b>  |
| <b>PC<sub>0</sub></b>   | -689.207875 | <b>-8.5</b> | -689.358430 | <b>-8.1</b>  | -689.252232 | <b>-10.5</b> |
| <b>2. one water</b>     |             |             |             |              |             |              |
|                         | OPT/B1+ZPE  | $\Delta E$  | SPE/B2+ZPE  | $\Delta E$   | $G$         | $\Delta G$   |
| <b>RC<sub>1</sub></b>   | -765.649675 | <b>0.0</b>  | -765.806056 | <b>0.0</b>   | -765.694391 | <b>0.0</b>   |
| <b>TS<sub>1</sub></b>   | -765.618317 | <b>19.7</b> | -765.773474 | <b>20.4</b>  | -765.661275 | <b>20.8</b>  |
| <b>PC<sub>1</sub></b>   | -765.665310 | <b>-9.8</b> | -765.821687 | <b>-9.8</b>  | -765.714121 | <b>-12.4</b> |
| <b>3. two water</b>     |             |             |             |              |             |              |
|                         | OPT/B1+ZPE  | $\Delta E$  | SPE/B2+ZPE  | $\Delta E$   | $G$         | $\Delta G$   |
| <b>RC<sub>2</sub></b>   | -842.110563 | <b>0.0</b>  | -842.270757 | <b>0.0</b>   | -842.158104 | <b>0.0</b>   |
| <b>TS<sub>2</sub></b>   | -842.082319 | <b>17.7</b> | -842.241032 | <b>18.7</b>  | -842.127555 | <b>19.2</b>  |
| <b>PC<sub>2</sub></b>   | -842.125754 | <b>-9.5</b> | -842.287249 | <b>-10.3</b> | -842.174841 | <b>-10.5</b> |

C1-O1 = 1.425  
 C1-O2 = 1.415  
 H1-O2 = 2.507  
 H1-O1 = 0.966  
 $\angle$ O2-H2-O3 = 158.4

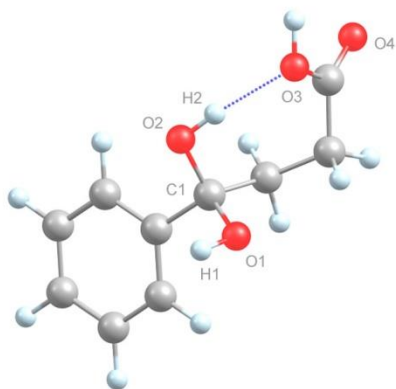

RC<sub>0</sub>

H1-O2 = 1.233  
 H1-O1 = 1.230  
 C1-O1 = 1.330  
 C1-O2 = 1.815  
 $\angle$ O1-H1-O2 = 127.4  
 $\nu_{\text{img}} = i 1818.8$

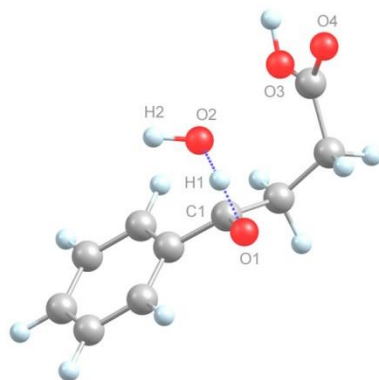

TS<sub>0</sub>

H1-O2 = 0.971  
 H1-O1 = 4.819  
 C1-O1 = 1.225  
 C1-O2 = 4.818  
 $\angle$ O2-H1-O4 = 179.5

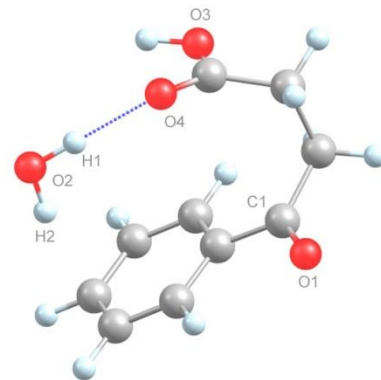

PC<sub>0</sub>

C1-O1 = 1.415  
 $\angle$ O1-H1-O5 = 148.4  
 C1-O2 = 1.432  
 $\angle$ O5-H3-O2 = 146.0  
 H2-O3 = 1.865  
 H3-O2 = 1.933  
 H1-O5 = 1.960

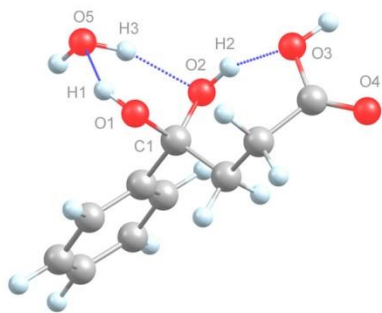

RC<sub>1</sub>

H1-O1 = 1.278  
 $\angle$ O1-H1-O5 = 148.4  
 H1-O5 = 1.162  
 $\angle$ C1-O2-H2 = 107.6  
 H3-O5 = 1.266  
 $\angle$ O2-H3-O5 = 146.0  
 $\nu_{\text{img}} = i 1370.5$   
 H3-O2 = 1.167  
 C1-O2 = 1.659  
 C1-O1 = 1.324

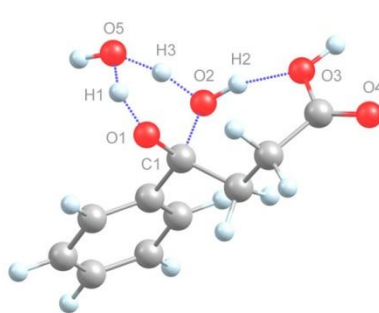

TS<sub>1</sub>

H1-O1 = 1.824  
 $\angle$ O1-H1-O5 = 178.3  
 H3-O5 = 1.855  
 $\angle$ O2-H3-O5 = 178.8  
 H2-O4 = 1.963  
 C1-O1 = 1.231

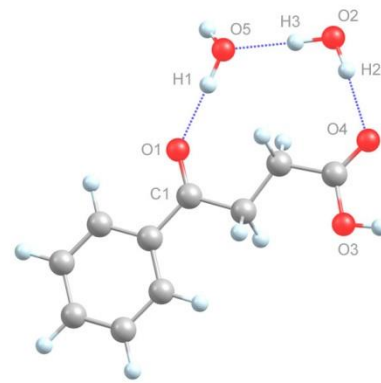

PC<sub>1</sub>

C1-O1 = 1.402  
 $\angle$ O1-H1-O5 = 176.2  
 C1-O2 = 1.440  
 $\angle$ O5-H4-O6 = 163.4  
 H2-O3 = 1.887  
 $\angle$ O6-H3-O2 = 166.8  
 H3-O2 = 1.778  
 H1-O5 = 1.767  
 O6-H4 = 1.764

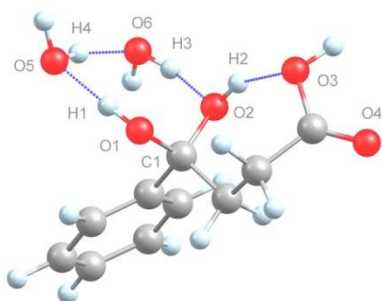

RC<sub>2</sub>

H1-O5 = 1.119  
 H1-O1 = 1.331  
 O5-H4 = 1.337  
 O6-H4 = 1.109  
 H3-O2 = 1.240  
 H3-O6 = 1.178  
 H2-O3 = 1.848  
 C1-O2 = 1.595  
 C1-O1 = 1.322  
 $\angle$ O6-H3-O2 = 172.9  
 $\angle$ C1-O2-H2 = 106.5  
 $\angle$ O1-H1-O5 = 172.7  
 $\angle$ O5-H4-O6 = 165.7  
 $\nu_{\text{img}} = i 1018.8$

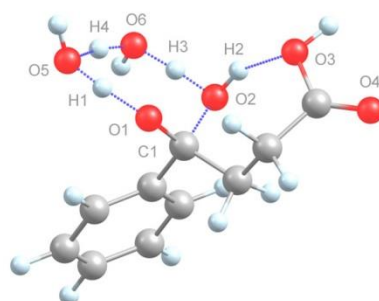

TS<sub>2</sub>

C1-O1 = 1.231  
 $\angle$ O1-H1-O5 = 149.4  
 H1-O1 = 1.966  
 $\angle$ O5-H4-O6 = 168.2  
 H4-O5 = 1.807  
 $\angle$ O6-H3-O2 = 170.8  
 H3-O6 = 1.856  
 $\angle$ O2-H2-O4 = 172.4  
 H2-O4 = 1.967

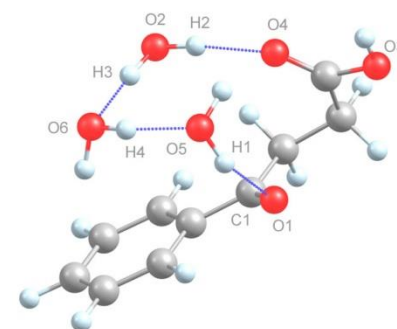

PC<sub>2</sub>

**Figure S15.** Optimized structures of the intermediates of the water-assisted dehydration of the *gem*-diol complex. Calculations were done at the UB3LYP-D3(BJ)/B1 level in solvent. Hydrogen atoms of *rac*-L are omitted for clarity. Lengths are in Å units, angles are in degree units and imaginary frequencies are in cm<sup>-1</sup> units.

**Part V Alcohol oxidation of 4-OH-PBA by the Mn<sup>IV</sup>(O)(AcO<sup>•</sup>) species 2 via the DHA and R-DHA mechanisms.**

**Table S14.** Various SCF and Gibbs free energies of the alcohol oxidation via the dual hydrogen abstraction (DHA) mechanism. Calculations were done at the UB3LYP-D3(BJ)/B2//B1 level in solvent.

|                                 | OPT/B1+ZPE   | $\Delta E$   | SPE/B2+ZPE   | $\Delta E$   | $G$          | $\Delta G$   |
|---------------------------------|--------------|--------------|--------------|--------------|--------------|--------------|
| <sup>3</sup> RC                 | -3300.863742 | <b>0.0</b>   | -3301.392463 | <b>0.0</b>   | -3300.949328 | <b>0.0</b>   |
| <sup>5</sup> RC                 | -3300.857928 | <b>3.6</b>   | -3301.379967 | <b>7.8</b>   | -3300.939823 | <b>6.0</b>   |
| <sup>3</sup> TS1                | -3300.862878 | <b>0.5</b>   | -3301.389706 | <b>1.7</b>   | -3300.944997 | <b>2.7</b>   |
| <sup>5</sup> TS1                | -3300.845133 | <b>11.7</b>  | -3301.371437 | <b>13.2</b>  | -3300.929341 | <b>12.5</b>  |
| <sup>3</sup> IM1                | -3300.932137 | <b>-42.9</b> | -3301.458993 | <b>-41.7</b> | -3301.015303 | <b>-41.4</b> |
| <sup>5</sup> IM1                | -3300.952417 | <b>-55.6</b> | -3301.478231 | <b>-53.8</b> | -3301.039626 | <b>-56.7</b> |
| <sup>3</sup> TS2 <sub>DHA</sub> | -3300.931139 | <b>-42.3</b> | -3301.458500 | <b>-41.4</b> | -3301.014142 | <b>-40.7</b> |
| <sup>5</sup> TS2 <sub>DHA</sub> | -3300.950728 | <b>-54.6</b> | -3301.476601 | <b>-52.8</b> | -3301.036120 | <b>-54.5</b> |
| <sup>3</sup> PC                 | -3300.977673 | <b>-71.5</b> | -3301.504299 | <b>-70.2</b> | -3301.063147 | <b>-71.4</b> |
| <sup>5</sup> PC                 | -3300.990461 | <b>-79.5</b> | -3301.515431 | <b>-77.2</b> | -3301.075405 | <b>-79.1</b> |

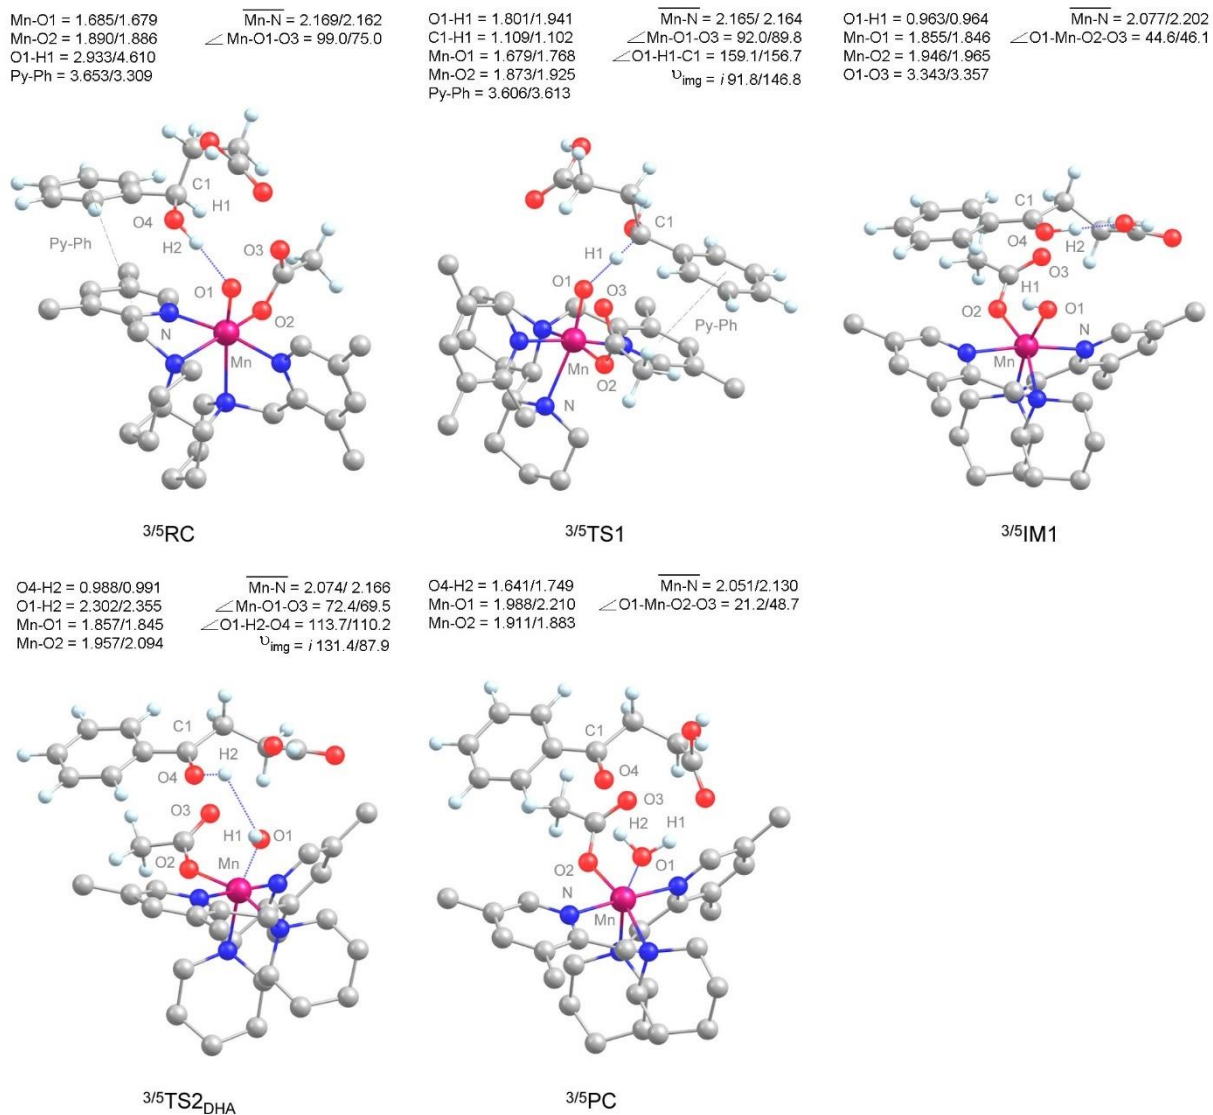

**Figure S16.** Optimized structures of key intermediates of the alcohol oxidation via the dual hydrogen abstraction (DHA) mechanism. Calculations were done at the UB3LYP-D3(BJ)/B1 level in solvent. Hydrogen atoms of *rac*-L are omitted for clarity. Lengths are in Å units, angles are in degree units and imaginary frequencies are in  $\text{cm}^{-1}$  units.

**Table S15.** Mulliken charges and spin densities of key intermediates of the alcohol oxidation via the dual hydrogen abstraction (DHA) mechanism.

|                                      | Mulliken charge |       |               |       |      |        | spin densities |       |               |       |      |        |
|--------------------------------------|-----------------|-------|---------------|-------|------|--------|----------------|-------|---------------|-------|------|--------|
|                                      | Mn              | O1    | <i>rac</i> -L | OAc   | H1   | Sub-H1 | Mn             | O1    | <i>rac</i> -L | OAc   | H1   | Sub-H1 |
| <b><sup>3</sup>RC</b>                | 0.49            | -0.25 | 1.81          | -0.09 | 0.14 | -0.10  | 2.95           | -0.41 | -0.28         | -0.27 | 0.00 | 0.00   |
| <b><sup>5</sup>RC</b>                | 0.63            | -0.57 | 1.77          | -0.37 | 0.14 | 0.40   | 2.71           | 0.44  | 0.23          | -0.01 | 0.00 | 0.63   |
| <b><sup>3</sup>TS1</b>               | 0.51            | -0.27 | 1.81          | -0.19 | 0.12 | 0.01   | 2.97           | -0.45 | -0.28         | -0.12 | 0.00 | -0.12  |
| <b><sup>5</sup>TS1</b>               | 0.54            | -0.32 | 1.75          | -0.13 | 0.13 | 0.03   | 3.04           | 0.81  | -0.26         | 0.26  | 0.00 | 0.16   |
| <b><sup>3</sup>IM1</b>               | 0.66            | -0.70 | 1.29          | -0.55 | 0.32 | 0.97   | 2.09           | 0.05  | -0.15         | -0.01 | 0.01 | 0.00   |
| <b><sup>5</sup>IM1</b>               | 0.91            | -0.69 | 1.04          | -0.56 | 0.32 | 0.97   | 3.97           | 0.00  | 0.00          | 0.02  | 0.01 | 0.00   |
| <b><sup>3</sup>TS2<sub>DHA</sub></b> | 0.67            | -0.69 | 1.32          | -0.55 | 0.32 | 0.94   | 2.09           | 0.05  | -0.14         | -0.01 | 0.01 | 0.00   |
| <b><sup>5</sup>TS2<sub>DHA</sub></b> | 0.88            | -0.69 | 1.19          | -0.65 | 0.33 | 0.95   | 3.97           | -0.01 | -0.04         | 0.07  | 0.01 | 0.00   |
| <b><sup>3</sup>PC</b>                | 0.57            | -0.60 | 1.57          | -0.39 | 0.38 | 0.48   | 2.15           | -0.01 | -0.16         | 0.02  | 0.00 | 0.00   |
| <b><sup>5</sup>PC</b>                | 0.83            | -0.69 | 1.43          | -0.44 | 0.38 | 0.49   | 4.03           | 0.03  | -0.06         | -0.01 | 0.00 | 0.00   |

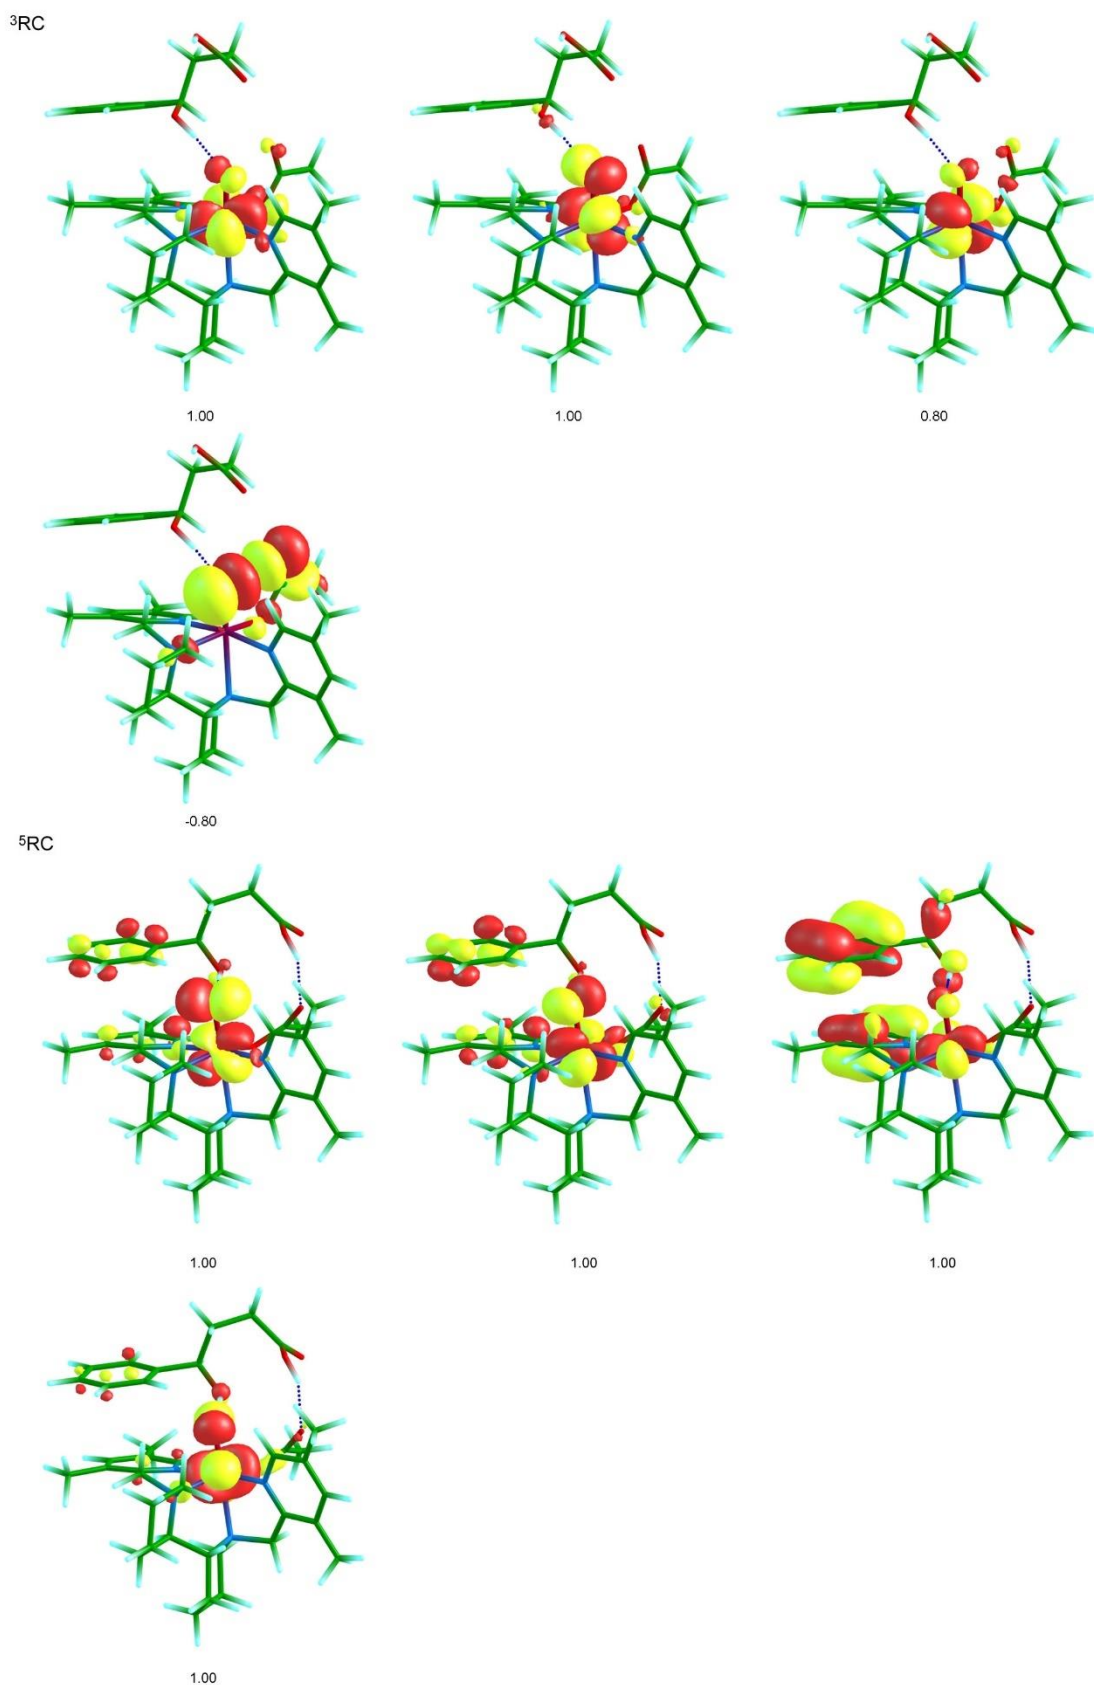

**Figure S17.** Singly-occupied natural orbitals (SNOs) of key intermediates of the alcohol oxidation via the dual hydrogen abstraction (DHA) mechanism. Calculations were done at the UB3LYP-D3(BJ)/B1 level in solvent. Positive values represent alpha-electron occupations and negative ones represent beta occupations. (To be continued)

<sup>3</sup>TS1

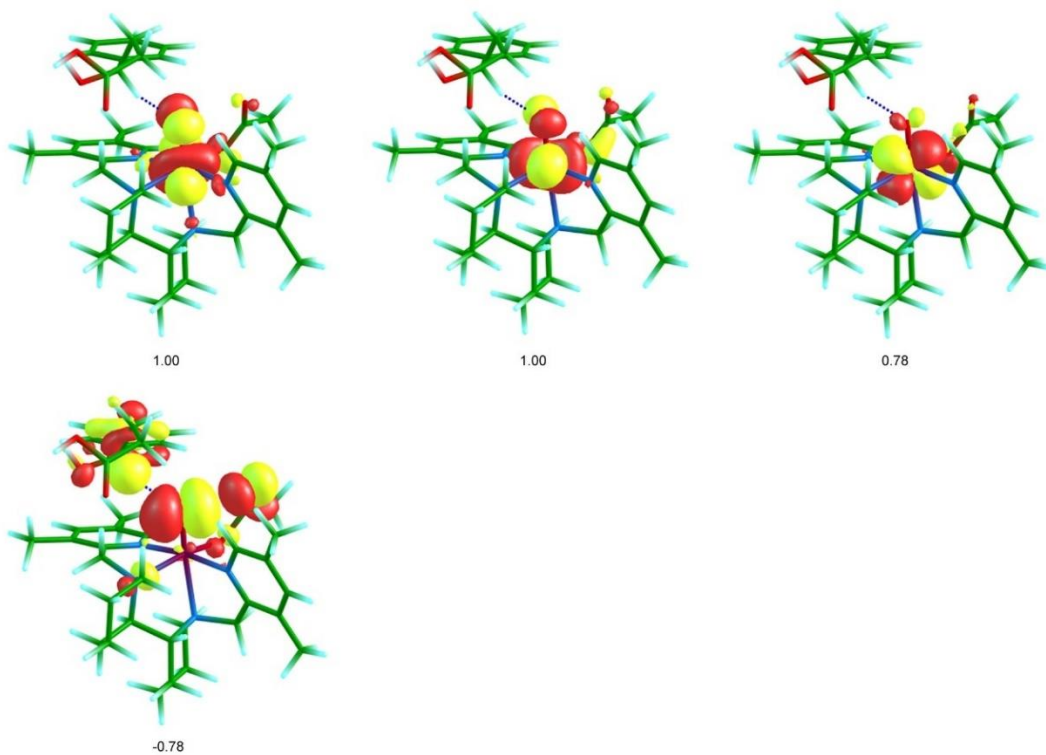

<sup>5</sup>TS1

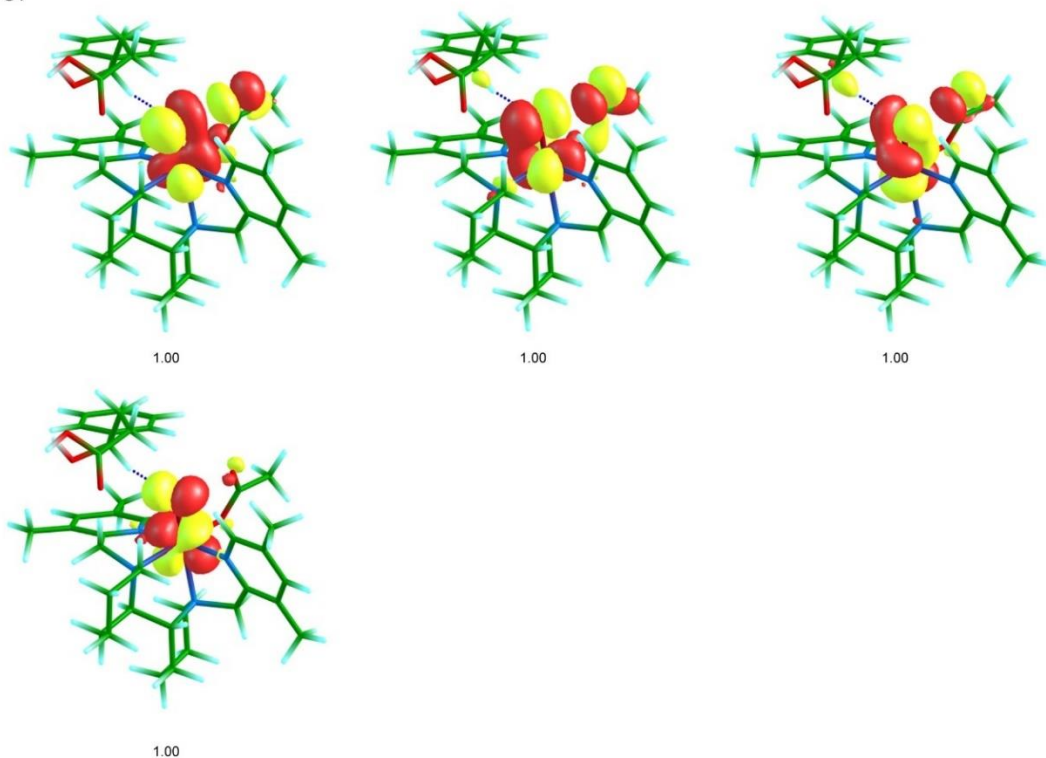

**Figure S17.** Singly-occupied natural orbitals (SNOs) of key intermediates of the alcohol oxidation via the dual hydrogen abstraction (DHA) mechanism. Calculations were done at the UB3LYP-D3(BJ)/B1 level in solvent. Positive and negative values represent alpha and netative ones represent beta occupations. (To be continued)



<sup>3</sup>IM1

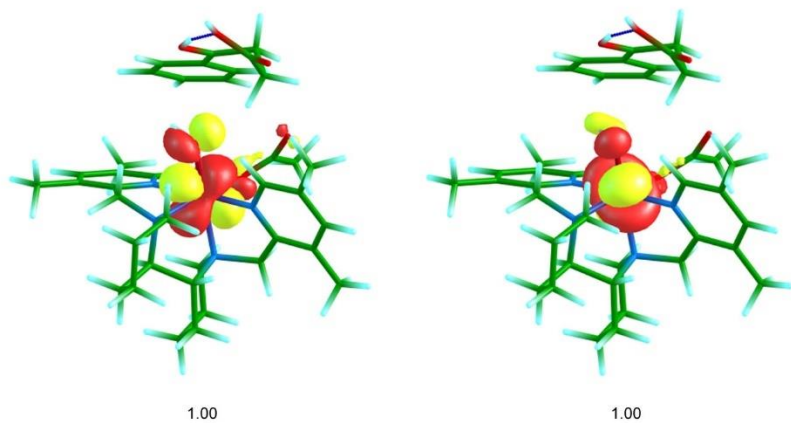

<sup>5</sup>IM1

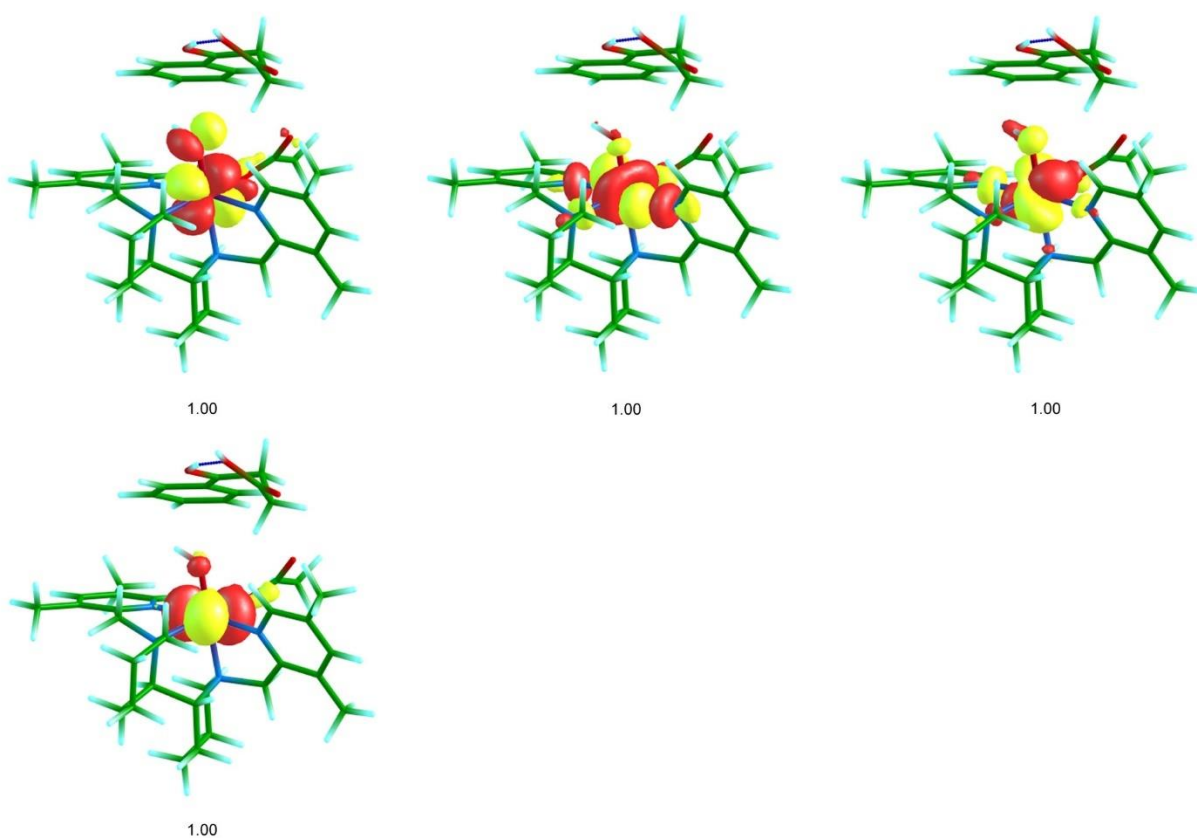

**Figure S17.** Singly-occupied natural orbitals (SNOs) of key intermediates of the alcohol oxidation via the dual hydrogen abstraction (DHA) mechanism. Calculations were done at the UB3LYP-D3(BJ)/B1 level in solvent. Positive values represent alpha-electron occupations. (To be continued)

$^3\text{TS2}_{\text{DHA}}$

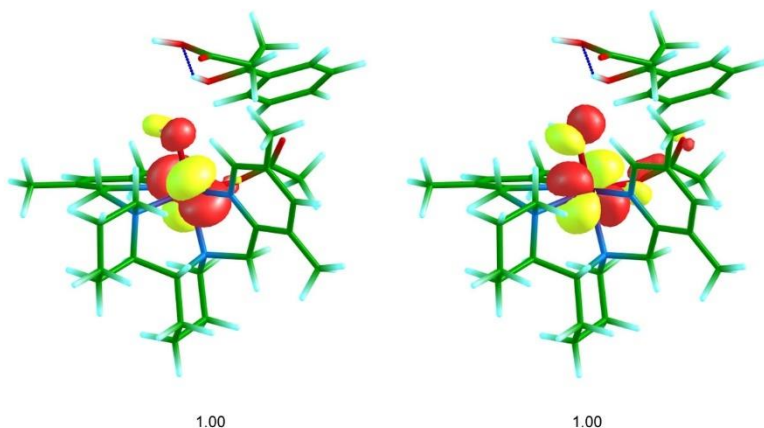

$^5\text{TS2}_{\text{DHA}}$

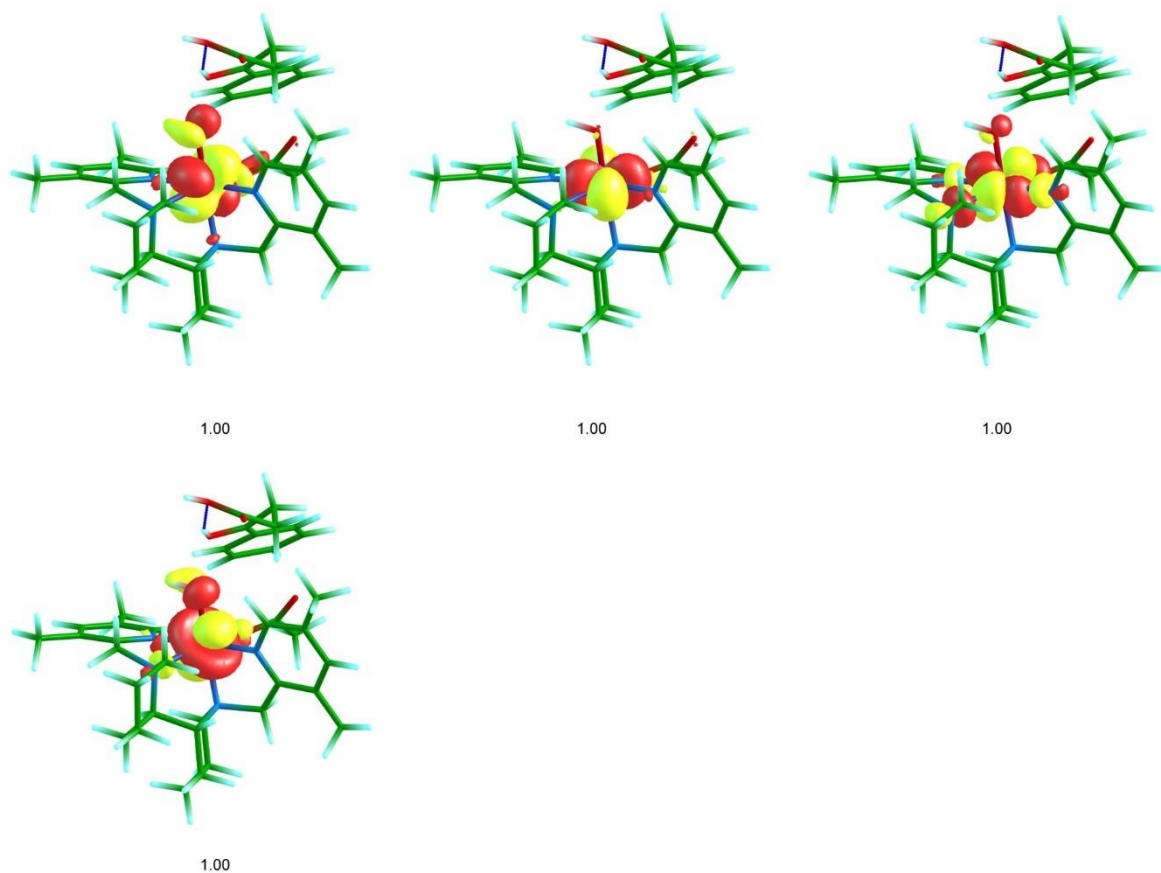

**Figure S17.** Singly-occupied natural orbitals (SNOs) of key intermediates of the alcohol oxidation via the dual hydrogen abstraction (DHA) mechanism. Calculations were done at the UB3LYP-D3(BJ)/B1 level in solvent. Positive values represent alpha-electron occupations. (To be continued)

$^3\text{PC}$

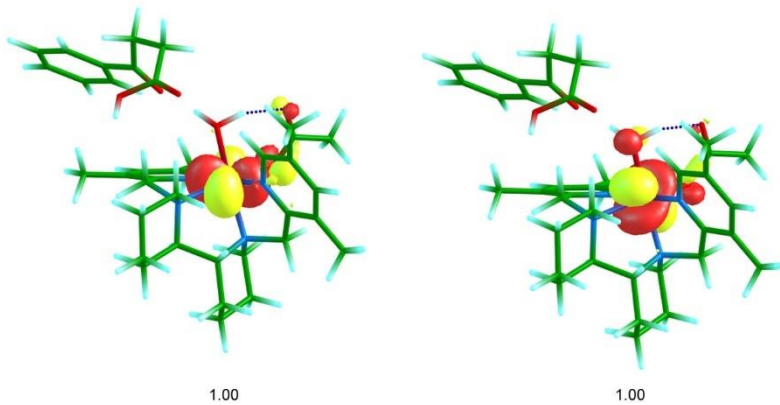

$^5\text{PC}$

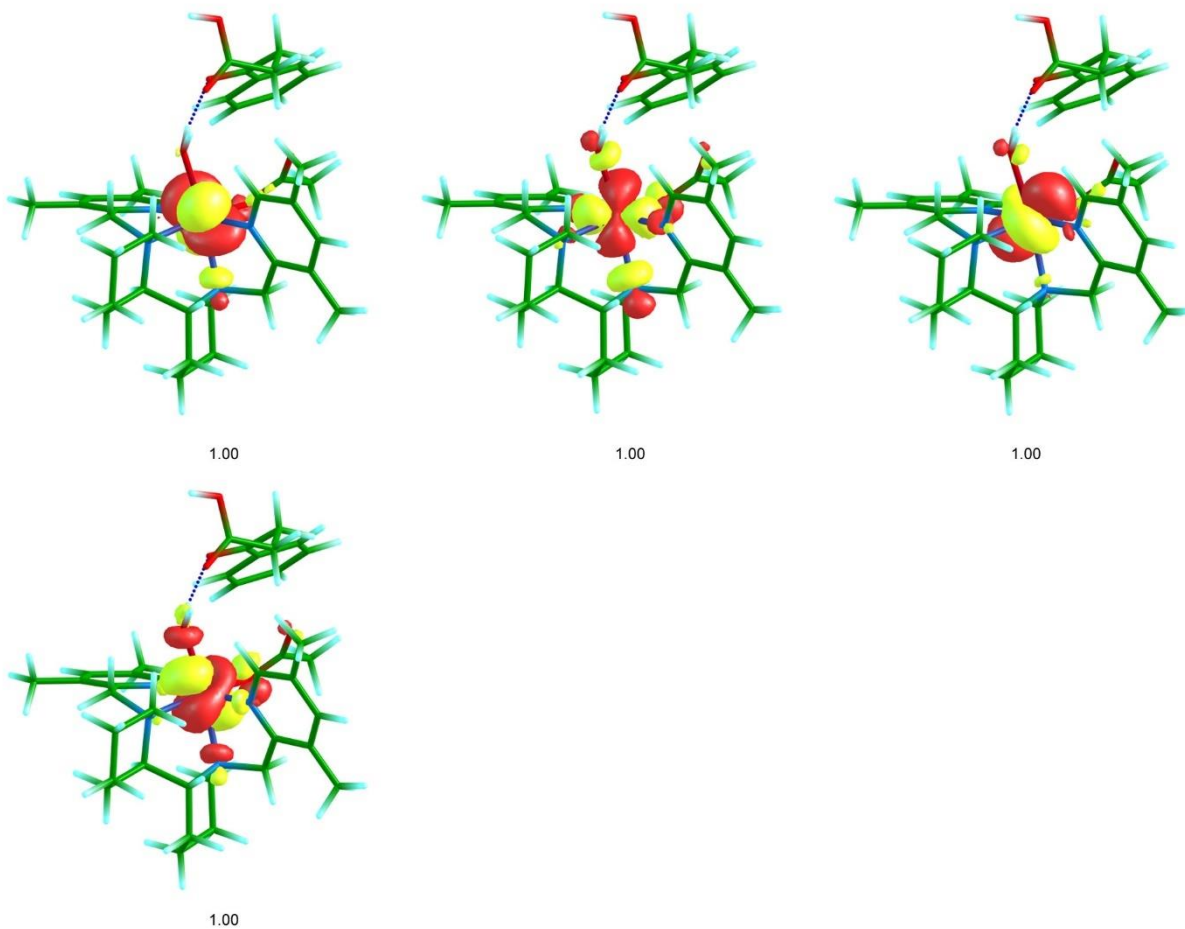

**Figure S17.** Singly-occupied natural orbitals (SNOs) of key intermediates of the alcohol oxidation via the dual hydrogen abstraction (DHA) mechanism. Calculations were done at the UB3LYP-D3(BJ)/B1 level in solvent. Positive values represent alpha-electron occupations.

**Table S16.** Various SCF and Gibbs free energies of key intermediates of the alcohol oxidation via the reversed-dual hydrogen abstraction (R-DHA) mechanism. Calculations were done at the UB3LYP-D3(BJ)/B2//B1 level in solvent.

|                                     | OPT/B1+ZPE                | $\Delta E$   | SPE/B2+ZPE   | $\Delta E$   | $G$          | $\Delta G$   |
|-------------------------------------|---------------------------|--------------|--------------|--------------|--------------|--------------|
| <b><sup>3</sup>RC</b>               | -3300.863742 <sup>a</sup> | <b>0.0</b>   | -3301.392463 | <b>0.0</b>   | -3300.949328 | <b>0.0</b>   |
| <b><sup>5</sup>RC</b>               | -3300.857928              | <b>3.6</b>   | -3301.379967 | <b>7.8</b>   | -3300.939823 | <b>6.0</b>   |
| <b><sup>3</sup>TS1<sub>OH</sub></b> | -3300.862077              | <b>1.0</b>   | -3301.386804 | <b>3.6</b>   | -3300.948573 | <b>0.5</b>   |
| <b><sup>5</sup>TS1<sub>OH</sub></b> | -3300.856629              | <b>4.5</b>   | -3301.379831 | <b>7.9</b>   | -3300.940961 | <b>5.3</b>   |
| <b><sup>3</sup>IM1<sub>OH</sub></b> | -3300.875001              | <b>-7.1</b>  | -3301.399817 | <b>-4.6</b>  | -3300.958342 | <b>-5.7</b>  |
| <b><sup>5</sup>IM1<sub>OH</sub></b> | -3300.875028              | <b>-7.1</b>  | -3301.399844 | <b>-4.6</b>  | -3300.958859 | <b>-6.0</b>  |
| <b><sup>3</sup>TS2<sub>CH</sub></b> | -3300.862650              | <b>0.7</b>   | -3301.386318 | <b>3.9</b>   | -3300.943775 | <b>3.5</b>   |
| <b><sup>5</sup>TS2<sub>CH</sub></b> | -3300.867065              | <b>-2.1</b>  | -3301.391130 | <b>0.8</b>   | -3300.951719 | <b>-1.5</b>  |
| <b><sup>3</sup>PC</b>               | -3300.976571              | <b>-70.8</b> | -3301.501783 | <b>-68.6</b> | -3301.059945 | <b>-69.4</b> |
| <b><sup>5</sup>PC</b>               | -3300.990511              | <b>-79.5</b> | -3301.514005 | <b>-76.3</b> | -3301.077113 | <b>-80.2</b> |

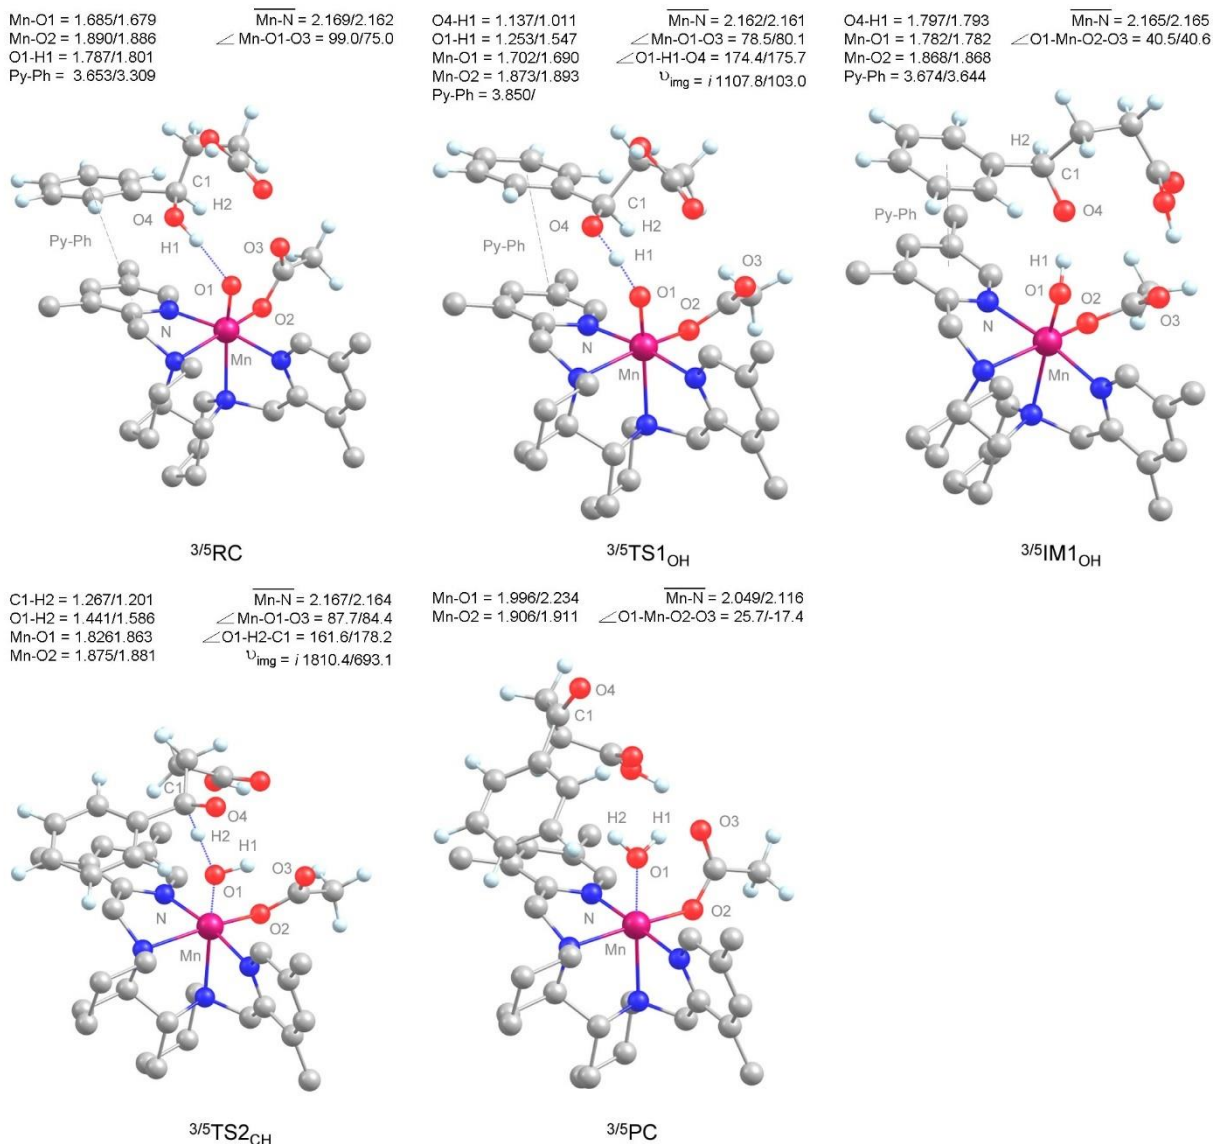

**Figure S18.** Optimized structures of key intermediates of the alcohol oxidation via the reversed-dual hydrogen abstraction (R-DHA) mechanism. Calculations were done at the UB3LYP-D3(BJ)/B1 level in solvent. Hydrogen atoms of *rac-L* are omitted for clarity. Lengths are in Å units, angles are in degree units and imaginary frequencies are in  $\text{cm}^{-1}$  units.

**Table S17.** Mulliken charges and spin densities of key intermediates of the alcohol oxidation via the reversed-dual hydrogen abstraction (R-DHA) mechanism. Calculations were done at the UB3LYP-D3(BJ)/B2//B1 level in solvent.

|                                     | Mulliken charge |       |               |       |      |        | spin densities |       |               |       |      |        |
|-------------------------------------|-----------------|-------|---------------|-------|------|--------|----------------|-------|---------------|-------|------|--------|
|                                     | Mn              | O1    | <i>rac</i> -L | OAc   | H1   | Sub-H1 | Mn             | O1    | <i>rac</i> -L | OAc   | H1   | Sub-H1 |
| <b><sup>3</sup>RC</b>               | 0.49            | -0.25 | 1.81          | -0.09 | 0.34 | -0.30  | 2.95           | -0.41 | -0.28         | -0.27 | 0.00 | 0.00   |
| <b><sup>5</sup>RC</b>               | 0.63            | -0.57 | 1.77          | -0.37 | 0.34 | 0.21   | 2.71           | 0.44  | 0.23          | -0.01 | 0.00 | 0.63   |
| <b><sup>3</sup>TS1<sub>OH</sub></b> | 0.63            | -0.54 | 1.60          | -0.36 | 0.31 | 0.35   | 2.90           | 0.22  | -0.20         | -0.01 | 0.01 | -0.93  |
| <b><sup>5</sup>TS1<sub>OH</sub></b> | 0.62            | -0.56 | 1.53          | -0.37 | 0.34 | 0.44   | 2.82           | 0.40  | -0.15         | -0.01 | 0.00 | 0.94   |
| <b><sup>3</sup>IM1<sub>OH</sub></b> | 0.57            | -0.50 | 1.82          | -0.29 | 0.36 | 0.04   | 3.20           | 0.09  | -0.32         | 0.00  | 0.02 | -0.99  |
| <b><sup>5</sup>IM1<sub>OH</sub></b> | 0.57            | -0.50 | 1.82          | -0.29 | 0.36 | 0.04   | 3.20           | 0.09  | -0.29         | 0.00  | 0.00 | 1.00   |
| <b><sup>3</sup>TS2<sub>CH</sub></b> | 0.60            | -0.54 | 1.78          | -0.26 | 0.38 | 0.04   | 3.05           | 0.08  | -0.32         | 0.01  | 0.01 | -0.82  |
| <b><sup>5</sup>TS2<sub>CH</sub></b> | 0.61            | -0.58 | 1.79          | -0.29 | 0.37 | 0.08   | 3.49           | -0.03 | -0.32         | 0.00  | 0.01 | 0.86   |
| <b><sup>3</sup>PC</b>               | 0.56            | -0.57 | 1.55          | -0.38 | 0.36 | 0.48   | 2.15           | -0.01 | -0.16         | 0.02  | 0.00 | 0.00   |
| <b><sup>5</sup>PC</b>               | 0.78            | -0.68 | 1.51          | -0.41 | 0.40 | 0.39   | 4.03           | 0.02  | -0.07         | 0.00  | 0.00 | 0.01   |

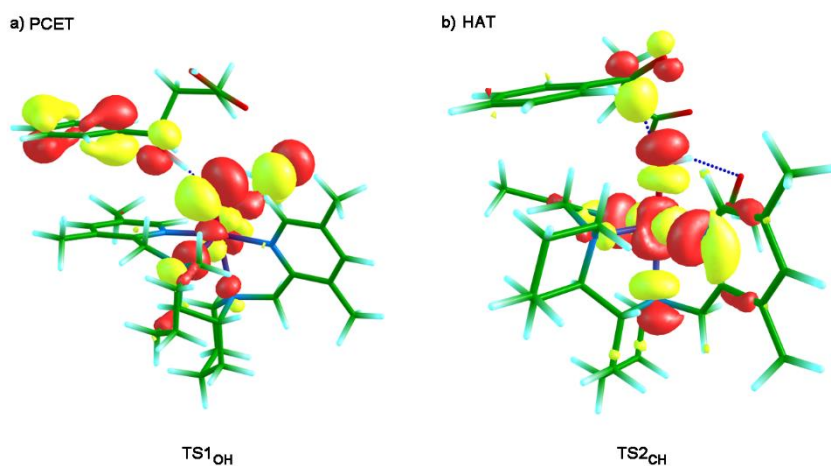

**Fig. S19** the singly-occupied natural orbitals of oxidants TS1<sub>OH</sub> on the triplet ground state and TS2<sub>CH</sub> on the quintet ground state. Calculations were performed at the UB3LYP/B1 level in a solvent.

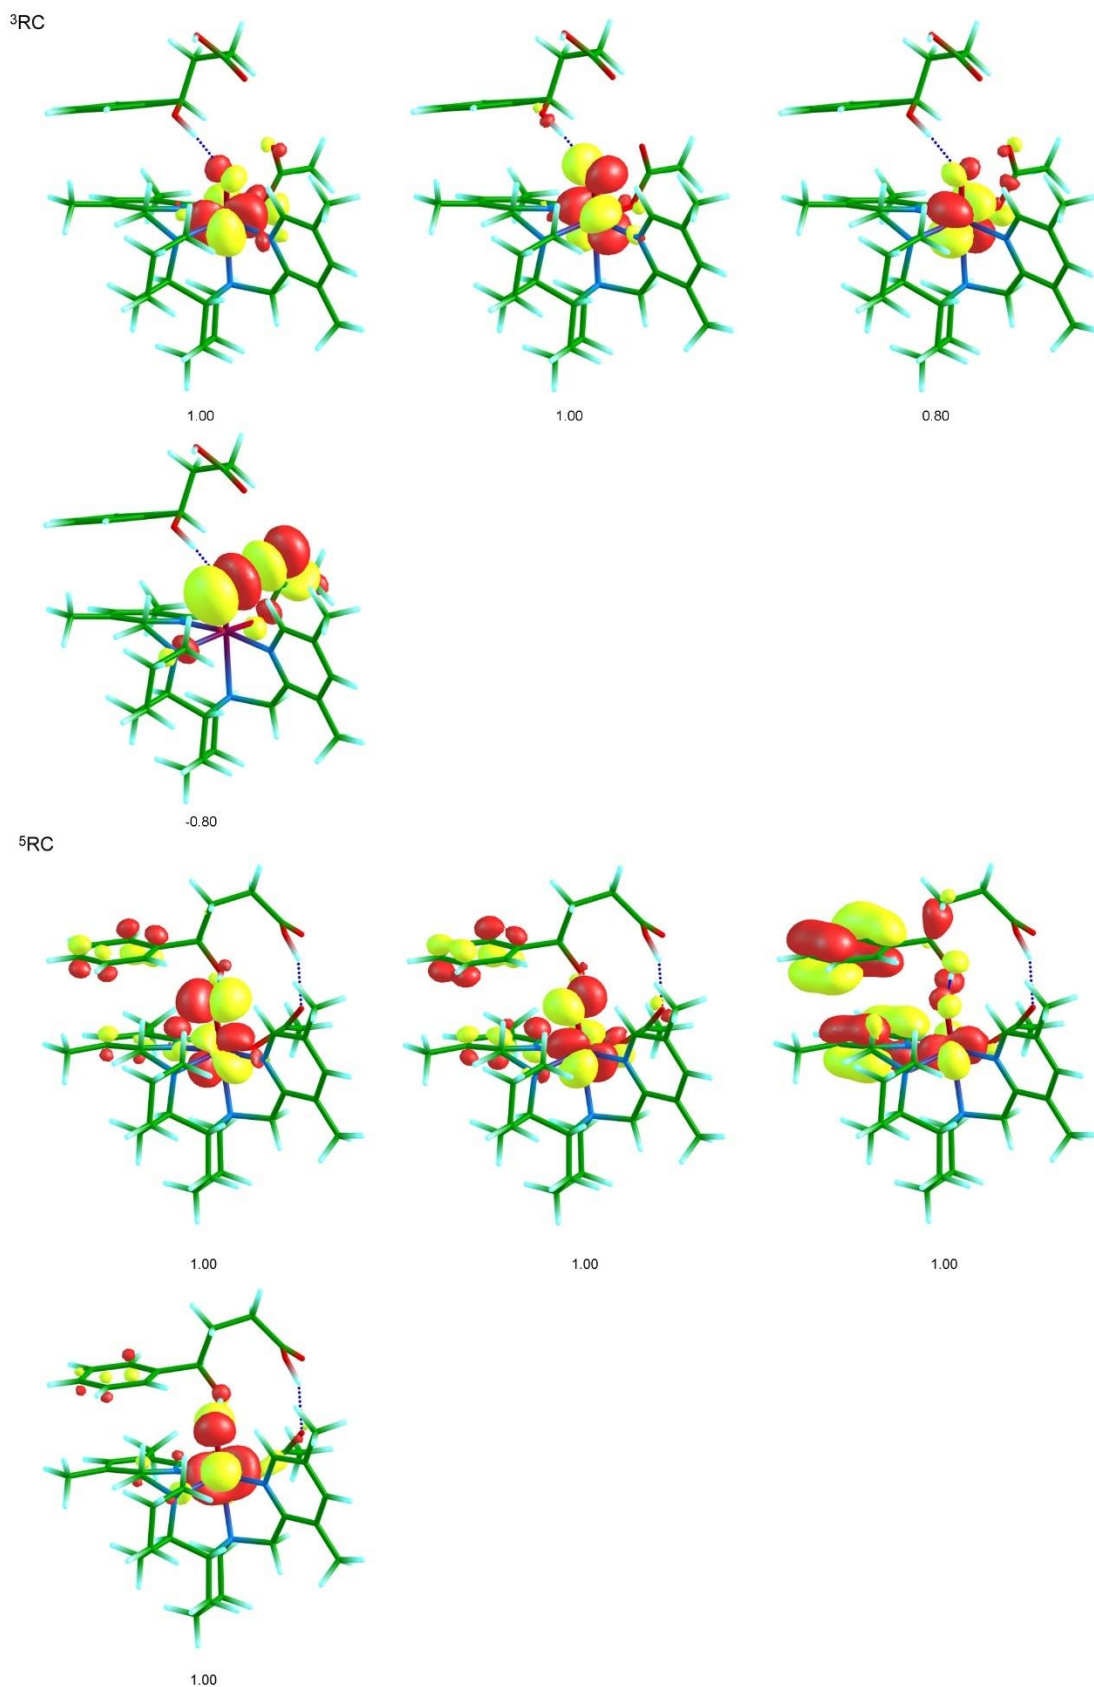

**Figure S20.** Singly-occupied natural orbitals (SNOs) of key intermediates of the alcohol oxidation via the reversed-dual hydrogen abstraction (R-DHA) mechanism. Calculations were done at the UB3LYP-D3(BJ)/B1 level in solvent. Positive and beta values represent alpha and netative ones represent beta occupations. (To be continued)



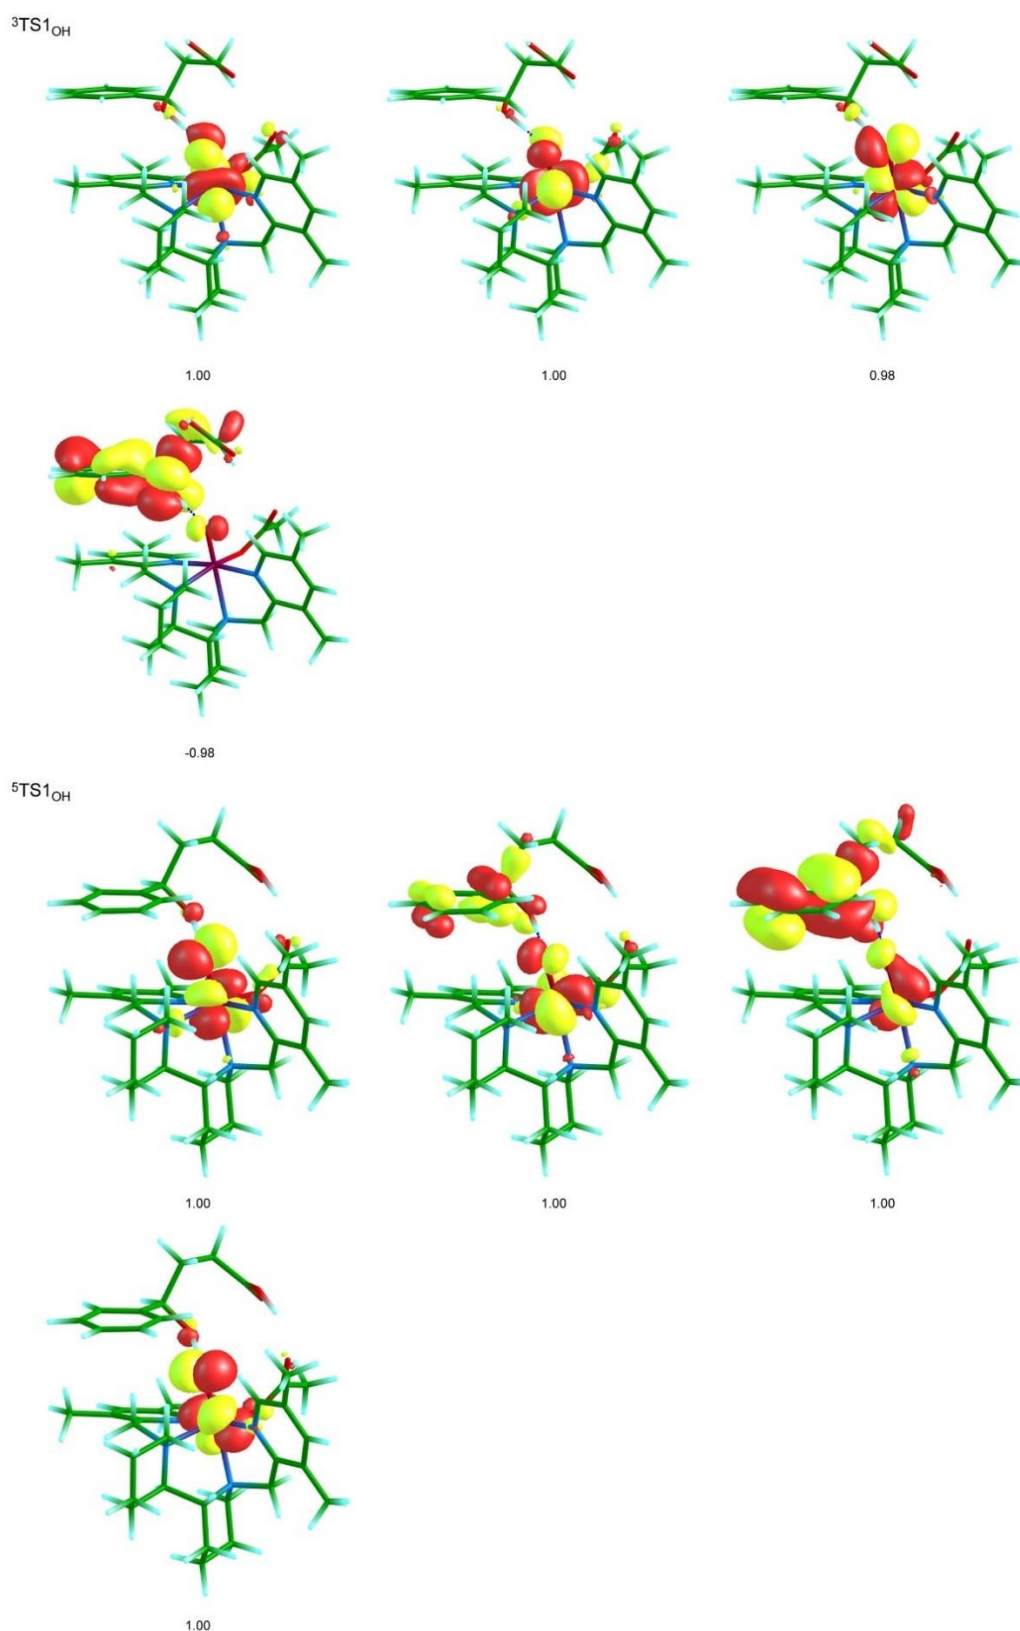

**Figure S20.** Singly-occupied natural orbitals (SNOs) of key intermediates of the alcohol oxidation via the reversed-dual hydrogen abstraction (R-DHA) mechanism. Calculations were done at the UB3LYP-D3(BJ)/B1 level in solvent. Positive and beta values represent alpha and netative ones represent beta occupations. (To be continued)

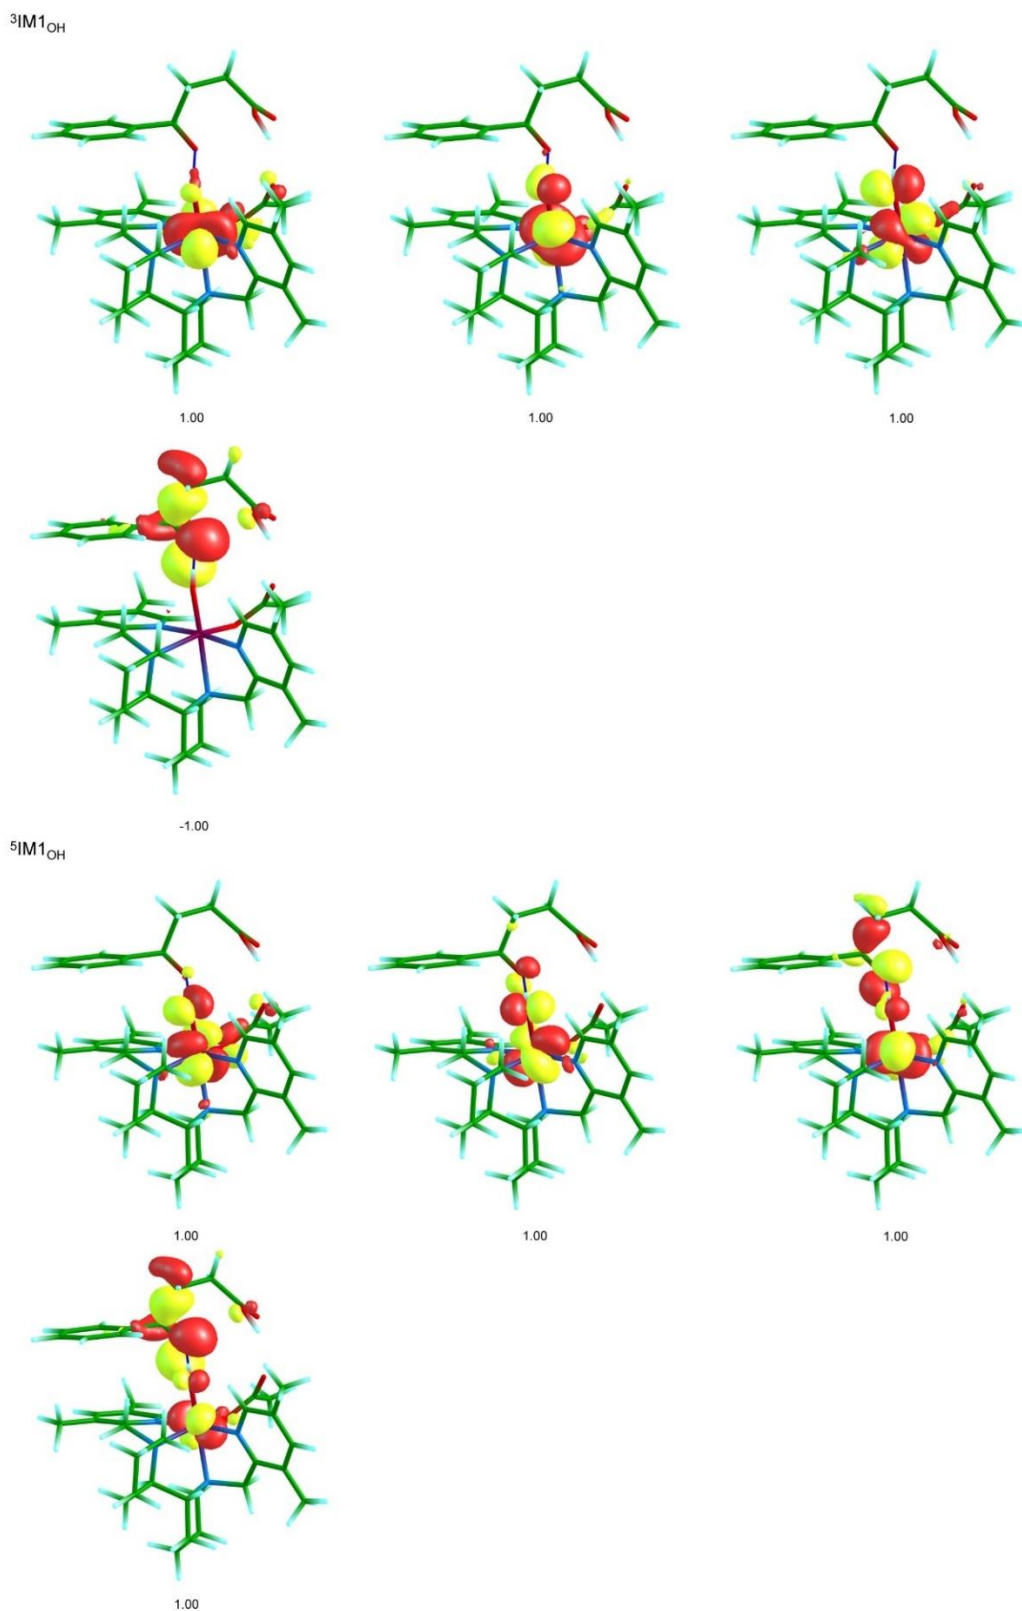

**Figure S20.** Singly-occupied natural orbitals (SNOs) of key intermediates of the alcohol oxidation via the reversed-dual hydrogen abstraction (R-DHA) mechanism. Calculations were done at the UB3LYP-D3(BJ)/B1 level in solvent. Positive and negative values represent alpha and netative ones represent beta occupations. (To be continued)

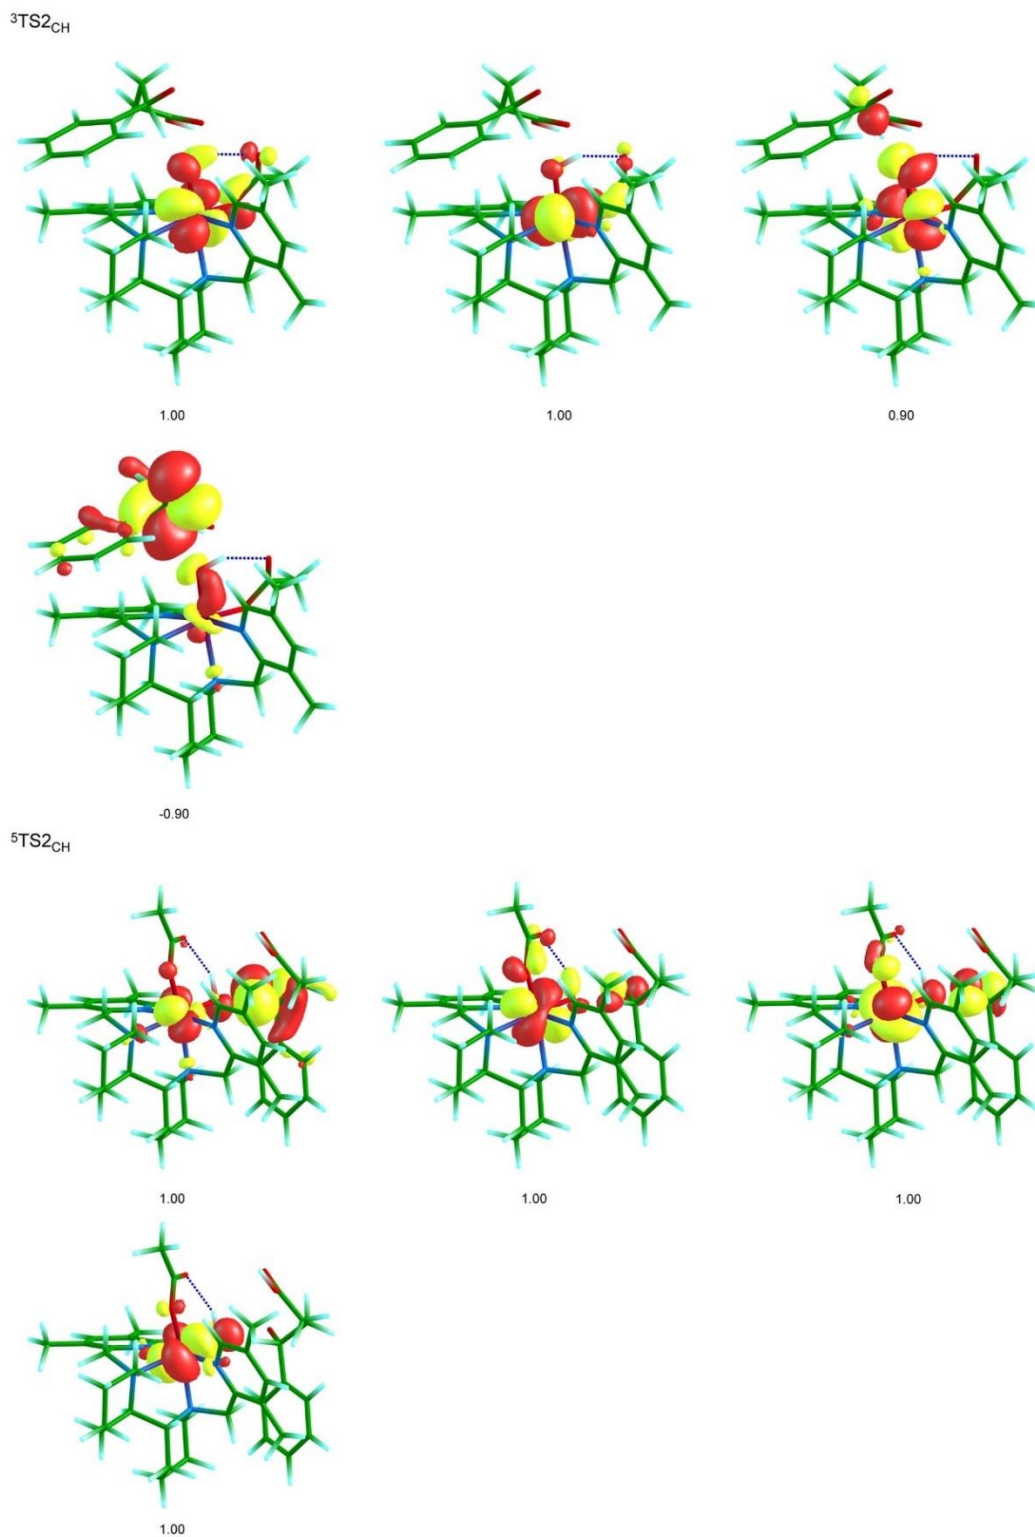

**Figure S20.** Singly-occupied natural orbitals (SNOs) of key intermediates of the alcohol oxidation via the reversed-dual hydrogen abstraction (R-DHA) mechanism. Calculations were done at the UB3LYP-D3(BJ)/B1 level in solvent. Positive and negative values represent alpha and netative ones represent beta occupations. (To be continued)

$^3\text{PC}$

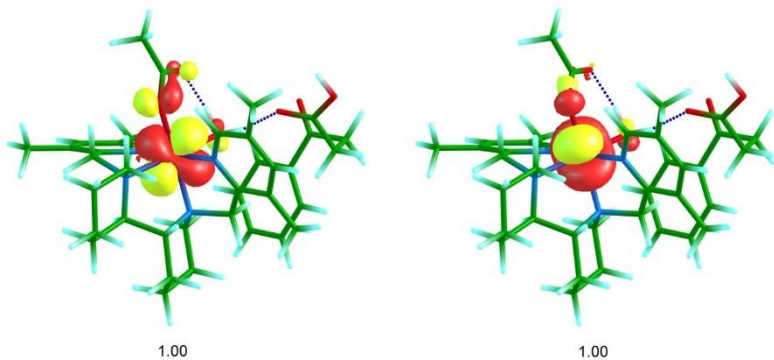

$^5\text{PC}$

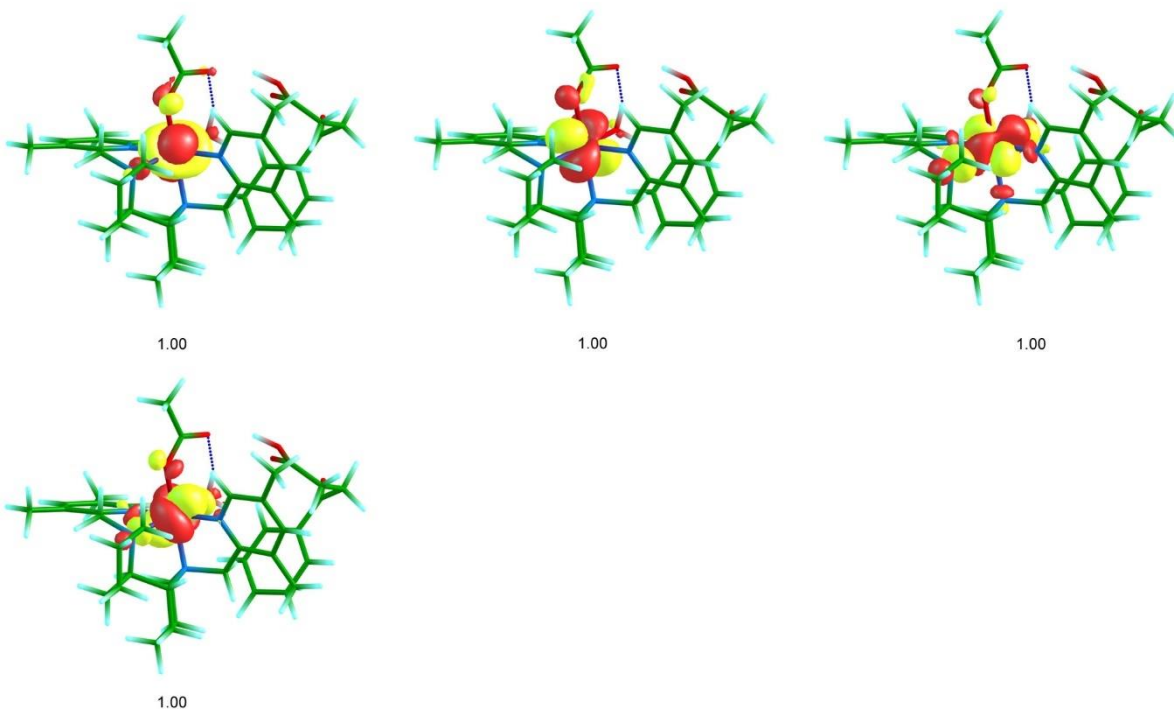

**Figure S20.** Singly-occupied natural orbitals (SNOs) of key intermediates of the alcohol oxidation via the reversed-dual hydrogen abstraction (R-DHA) mechanism. Calculations were done at the UB3LYP-D3(BJ)/B1 level in solvent. Positive values represent alpha-electron occupations and netative ones represent beta occupations.

## Part VI Cartesian coordinates

### Part I Conversion of the Mn<sup>III</sup>-OOH species 1 to a Mn<sup>III</sup>-peracetate species 3 via a Mn<sup>IV</sup>(O)(AcO•) species 2.

<sup>3</sup>1

|    |              |              |              |                |              |              |              |
|----|--------------|--------------|--------------|----------------|--------------|--------------|--------------|
| Mn | 0.012757000  | 0.561184000  | -0.406462000 | H              | 1.761082000  | -0.723256000 | -2.701720000 |
| N  | 2.042161000  | 0.757411000  | -0.217522000 | H              | 2.496087000  | -2.074517000 | -1.842870000 |
| N  | 0.631719000  | -1.374519000 | -1.054074000 | H              | 1.710048000  | -1.840946000 | 0.682187000  |
| N  | -2.066102000 | 0.286757000  | -0.457336000 | H              | 2.089529000  | -3.762871000 | -0.628352000 |
| N  | -0.386298000 | -0.525898000 | 1.488980000  | H              | 1.169305000  | -4.278268000 | 0.753605000  |
| C  | 2.763514000  | -0.153616000 | -0.905980000 | H              | 0.340494000  | -5.318819000 | -1.382781000 |
| C  | 4.163067000  | -0.140062000 | -0.888055000 | H              | -0.923083000 | -4.339598000 | -0.650510000 |
| C  | 4.780603000  | 0.855778000  | -0.128499000 | H              | -0.804228000 | -3.784335000 | -3.064462000 |
| C  | 4.039697000  | 1.804008000  | 0.586352000  | H              | 0.923597000  | -3.482666000 | -2.948947000 |
| C  | 2.654693000  | 1.711499000  | 0.507033000  | H              | -0.364820000 | -1.328260000 | -2.894155000 |
| C  | 4.702878000  | 2.874768000  | 1.407962000  | H              | -1.327761000 | -1.941513000 | -1.556999000 |
| C  | 4.966189000  | -1.154603000 | -1.658199000 | H              | -5.875924000 | -0.095715000 | -0.312648000 |
| C  | 1.955230000  | -1.138060000 | -1.708836000 | H              | -2.239476000 | 0.678795000  | -2.471440000 |
| C  | 0.818581000  | -2.232695000 | 0.190158000  | H              | -5.715258000 | 1.286811000  | -2.730261000 |
| C  | 1.097490000  | -3.700583000 | -0.169970000 | H              | -5.522032000 | -0.430087000 | -3.085660000 |
| C  | 0.062774000  | -4.291848000 | -1.129735000 | H              | -4.328785000 | 0.734172000  | -3.686235000 |
| C  | -0.018379000 | -3.428568000 | -2.391555000 | H              | -4.370370000 | -1.416184000 | 2.531291000  |
| C  | -0.342367000 | -1.982649000 | -2.021344000 | H              | -5.798239000 | -0.511985000 | 2.009785000  |
| C  | -2.662421000 | 0.003886000  | 0.716733000  | H              | -4.495441000 | 0.309967000  | 2.880104000  |
| C  | -4.052444000 | -0.144702000 | 0.814484000  | H              | -1.655647000 | 0.889881000  | 2.373711000  |
| C  | -4.796121000 | 0.015486000  | -0.355025000 | H              | -2.157733000 | -0.771763000 | 2.659215000  |
| C  | -4.182585000 | 0.313903000  | -1.576498000 | H              | -1.299811000 | -2.149820000 | 0.536339000  |
| C  | -2.797658000 | 0.442999000  | -1.573390000 | H              | -1.450127000 | -2.782356000 | 2.804574000  |
| C  | -4.976447000 | 0.487204000  | -2.842443000 | H              | -0.404166000 | -3.940936000 | 2.036430000  |
| C  | -4.715031000 | -0.456903000 | 2.130575000  | H              | 0.476638000  | -3.205637000 | 4.276462000  |
| C  | -1.748380000 | -0.095049000 | 1.908325000  | H              | 1.611200000  | -2.775160000 | 3.004368000  |
| C  | -0.386767000 | -1.993660000 | 1.113257000  | H              | 1.307827000  | -0.806321000 | 4.480389000  |
| C  | -0.459084000 | -2.897708000 | 2.353898000  | H              | -0.439584000 | -0.898717000 | 4.307448000  |
| C  | 0.609026000  | -2.565972000 | 3.399413000  | H              | 0.510122000  | 0.853755000  | 2.782132000  |
| C  | 0.507522000  | -1.088286000 | 3.789737000  | H              | 1.615224000  | -0.335777000 | 2.110008000  |
| C  | 0.625315000  | -0.205873000 | 2.548040000  | O              | 0.032224000  | 1.116420000  | -2.184106000 |
| H  | 5.865598000  | 0.891569000  | -0.091325000 | O              | 0.491014000  | 2.472211000  | -2.393498000 |
| H  | 2.006266000  | 2.400750000  | 1.033537000  | H              | 1.451416000  | 2.384025000  | -2.508479000 |
| H  | 5.354564000  | 3.492980000  | 0.782936000  | O              | -0.425092000 | 2.350756000  | 0.673507000  |
| H  | 5.325128000  | 2.430318000  | 2.190977000  | C              | -0.819169000 | 3.509323000  | 0.461765000  |
| H  | 3.965180000  | 3.524500000  | 1.883188000  | O              | -0.715793000 | 4.098107000  | -0.702493000 |
| H  | 4.758423000  | -2.171450000 | -1.308715000 | H              | -0.251604000 | 3.510527000  | -1.365280000 |
| H  | 6.034618000  | -0.968659000 | -1.537739000 | C              | -1.467358000 | 4.319043000  | 1.537293000  |
| H  | 4.733120000  | -1.119206000 | -2.726889000 | H              | -1.214195000 | 5.374602000  | 1.433920000  |
|    |              |              |              | H              | -2.552639000 | 4.214741000  | 1.427860000  |
|    |              |              |              | H              | -1.176864000 | 3.939254000  | 2.515937000  |
|    |              |              |              | <sup>5</sup> 1 |              |              |              |

|    |              |              |              |                               |              |              |              |
|----|--------------|--------------|--------------|-------------------------------|--------------|--------------|--------------|
| Mn | -0.030976000 | 0.511103000  | -0.421124000 | H                             | -0.174671000 | -1.557781000 | -2.881536000 |
| N  | 2.043669000  | 0.774891000  | -0.239071000 | H                             | -1.195349000 | -2.083272000 | -1.552304000 |
| N  | 0.750075000  | -1.504254000 | -1.006473000 | H                             | -5.871517000 | -0.197230000 | -0.377372000 |
| N  | -2.080546000 | 0.270840000  | -0.512528000 | H                             | -2.240875000 | 0.611053000  | -2.537832000 |
| N  | -0.376370000 | -0.472251000 | 1.426189000  | H                             | -5.733121000 | 1.130511000  | -2.824673000 |
| C  | 2.801300000  | -0.144051000 | -0.865941000 | H                             | -5.504715000 | -0.591391000 | -3.133414000 |
| C  | 4.201452000  | -0.061155000 | -0.852124000 | H                             | -4.334538000 | 0.580462000  | -3.764678000 |
| C  | 4.773265000  | 1.011388000  | -0.166837000 | H                             | -4.353557000 | -1.413998000 | 2.507610000  |
| C  | 3.988502000  | 1.971369000  | 0.482387000  | H                             | -5.799732000 | -0.556347000 | 1.958337000  |
| C  | 2.610421000  | 1.805505000  | 0.413765000  | H                             | -4.520138000 | 0.317316000  | 2.813027000  |
| C  | 4.598662000  | 3.127332000  | 1.225980000  | H                             | -1.664044000 | 0.950578000  | 2.281632000  |
| C  | 5.055546000  | -1.084872000 | -1.552860000 | H                             | -2.133921000 | -0.708886000 | 2.624696000  |
| C  | 2.067456000  | -1.230742000 | -1.616000000 | H                             | -1.242922000 | -2.166965000 | 0.546624000  |
| C  | 0.891576000  | -2.269405000 | 0.279363000  | H                             | -1.454731000 | -2.650765000 | 2.859548000  |
| C  | 1.178368000  | -3.759431000 | 0.031046000  | H                             | -0.391124000 | -3.848394000 | 2.184690000  |
| C  | 0.173812000  | -4.408589000 | -0.925277000 | H                             | 0.439228000  | -2.969742000 | 4.395057000  |
| C  | 0.135175000  | -3.625180000 | -2.241398000 | H                             | 1.601605000  | -2.631533000 | 3.120699000  |
| C  | -0.187757000 | -2.156880000 | -1.968719000 | H                             | 1.287133000  | -0.565735000 | 4.447694000  |
| C  | -2.671302000 | -0.002129000 | 0.666746000  | H                             | -0.457681000 | -0.664197000 | 4.266822000  |
| C  | -4.056369000 | -0.178097000 | 0.763037000  | H                             | 0.509814000  | 0.984446000  | 2.646233000  |
| C  | -4.794351000 | -0.062361000 | -0.416788000 | H                             | 1.620658000  | -0.245698000 | 2.059408000  |
| C  | -4.183862000 | 0.220241000  | -1.644517000 | O                             | 0.031531000  | 1.039914000  | -2.220984000 |
| C  | -2.802749000 | 0.383864000  | -1.639576000 | O                             | 0.389163000  | 2.421245000  | -2.400955000 |
| C  | -4.978433000 | 0.343220000  | -2.915443000 | H                             | 1.350488000  | 2.395833000  | -2.537510000 |
| C  | -4.718851000 | -0.473135000 | 2.082606000  | O                             | -0.387622000 | 2.415399000  | 0.681387000  |
| C  | -1.746845000 | -0.049592000 | 1.848598000  | C                             | -0.924985000 | 3.508680000  | 0.457610000  |
| C  | -0.349223000 | -1.968727000 | 1.141283000  | O                             | -0.914291000 | 4.067335000  | -0.732310000 |
| C  | -0.454701000 | -2.788243000 | 2.436994000  | H                             | -0.418253000 | 3.495226000  | -1.378189000 |
| C  | 0.593142000  | -2.391347000 | 3.479859000  | C                             | -1.659609000 | 4.269675000  | 1.513720000  |
| C  | 0.492176000  | -0.890985000 | 3.770100000  | H                             | -1.653302000 | 5.339711000  | 1.307222000  |
| C  | 0.627992000  | -0.086618000 | 2.478089000  | H                             | -2.698957000 | 3.921663000  | 1.512930000  |
| H  | 5.855522000  | 1.099973000  | -0.137081000 | H                             | -1.227614000 | 4.055009000  | 2.491066000  |
| H  | 1.930460000  | 2.498781000  | 0.892562000  | <sup>3</sup> TS <sub>12</sub> |              |              |              |
| H  | 5.239930000  | 3.717775000  | 0.564457000  | Mn                            | -0.008269000 | 0.636138000  | -0.395274000 |
| H  | 5.221410000  | 2.769734000  | 2.052065000  | N                             | 2.038499000  | 0.714228000  | -0.184884000 |
| H  | 3.829855000  | 3.785033000  | 1.636740000  | N                             | 0.564947000  | -1.313334000 | -1.124147000 |
| H  | 4.902501000  | -2.084456000 | -1.132304000 | N                             | -2.075277000 | 0.377100000  | -0.412537000 |
| H  | 6.112702000  | -0.834445000 | -1.450025000 | N                             | -0.405271000 | -0.601698000 | 1.496755000  |
| H  | 4.821482000  | -1.138260000 | -2.620593000 | C                             | 2.724831000  | -0.166510000 | -0.945416000 |
| H  | 1.898173000  | -0.893525000 | -2.643390000 | C                             | 4.123402000  | -0.203016000 | -0.929430000 |
| H  | 2.682566000  | -2.131265000 | -1.671083000 | C                             | 4.775720000  | 0.705095000  | -0.093026000 |
| H  | 1.764720000  | -1.849436000 | 0.782092000  | C                             | 4.068609000  | 1.613344000  | 0.702911000  |
| H  | 2.182448000  | -3.841370000 | -0.398802000 | C                             | 2.681098000  | 1.579729000  | 0.620180000  |
| H  | 1.225831000  | -4.285888000 | 0.986371000  | C                             | 4.767439000  | 2.584446000  | 1.613619000  |
| H  | 0.456396000  | -5.449824000 | -1.104934000 | C                             | 4.889217000  | -1.181775000 | -1.779406000 |
| H  | -0.827695000 | -4.426948000 | -0.476550000 | C                             | 1.876015000  | -1.064411000 | -1.800844000 |
| H  | -0.625688000 | -4.026045000 | -2.917949000 | C                             | 0.754353000  | -2.235504000 | 0.074022000  |
| H  | 1.098736000  | -3.711422000 | -2.757407000 | C                             | 1.006554000  | -3.684839000 | -0.372221000 |

|   |              |              |              |                               |              |              |              |
|---|--------------|--------------|--------------|-------------------------------|--------------|--------------|--------------|
| C | -0.057951000 | -4.209472000 | -1.337663000 | H                             | 0.430361000  | -3.469594000 | 4.093968000  |
| C | -0.153312000 | -3.279915000 | -2.550214000 | H                             | 1.562214000  | -2.973635000 | 2.843427000  |
| C | -0.444473000 | -1.848961000 | -2.101067000 | H                             | 1.301511000  | -1.102307000 | 4.450147000  |
| C | -2.663838000 | 0.024220000  | 0.749850000  | H                             | -0.448565000 | -1.154430000 | 4.283109000  |
| C | -4.054907000 | -0.115734000 | 0.841254000  | H                             | 0.521371000  | 0.677699000  | 2.866389000  |
| C | -4.801957000 | 0.125049000  | -0.312800000 | H                             | 1.601385000  | -0.484966000 | 2.112537000  |
| C | -4.194693000 | 0.496398000  | -1.517383000 | O                             | -0.024528000 | 1.230986000  | -2.004462000 |
| C | -2.810235000 | 0.615380000  | -1.514007000 | O                             | 0.673463000  | 2.789487000  | -2.361456000 |
| C | -4.993924000 | 0.757180000  | -2.764349000 | H                             | 1.613933000  | 2.570760000  | -2.270830000 |
| C | -4.718480000 | -0.504410000 | 2.136342000  | O                             | -0.306617000 | 2.267840000  | 0.727927000  |
| C | -1.750977000 | -0.157338000 | 1.933127000  | C                             | -0.616054000 | 3.478059000  | 0.537674000  |
| C | -0.436732000 | -2.034389000 | 1.026304000  | O                             | -0.417781000 | 4.104412000  | -0.564453000 |
| C | -0.514801000 | -3.019615000 | 2.204181000  | H                             | 0.076811000  | 3.535657000  | -1.314741000 |
| C | 0.566536000  | -2.775134000 | 3.260198000  | C                             | -1.255478000 | 4.233447000  | 1.657826000  |
| C | 0.492613000  | -1.324758000 | 3.747857000  | H                             | -1.249667000 | 5.304538000  | 1.462775000  |
| C | 0.615273000  | -0.366721000 | 2.563464000  | H                             | -2.289313000 | 3.884056000  | 1.752287000  |
| H | 5.861160000  | 0.699172000  | -0.056650000 | H                             | -0.741713000 | 4.003272000  | 2.593024000  |
| H | 2.058554000  | 2.244538000  | 1.204651000  | <sup>5</sup> TS <sub>12</sub> |              |              |              |
| H | 5.434023000  | 3.237081000  | 1.041696000  | Mn                            | -0.001201000 | 0.597645000  | -0.381553000 |
| H | 5.379871000  | 2.051060000  | 2.347087000  | N                             | 2.015552000  | 0.855382000  | -0.206815000 |
| H | 4.052176000  | 3.209434000  | 2.151881000  | N                             | 0.684849000  | -1.243243000 | -1.163171000 |
| H | 4.657039000  | -2.214577000 | -1.499049000 | N                             | -2.028890000 | 0.205234000  | -0.337434000 |
| H | 5.963303000  | -1.033474000 | -1.658348000 | N                             | -0.265068000 | -0.686923000 | 1.514426000  |
| H | 4.646392000  | -1.063949000 | -2.839769000 | C                             | 2.751738000  | 0.065180000  | -1.015118000 |
| H | 1.665679000  | -0.572679000 | -2.754320000 | C                             | 4.146674000  | 0.156415000  | -1.043372000 |
| H | 2.383544000  | -2.004091000 | -2.016005000 | C                             | 4.738599000  | 1.101363000  | -0.202129000 |
| H | 1.657605000  | -1.882508000 | 0.572950000  | C                             | 3.976813000  | 1.922734000  | 0.636763000  |
| H | 1.987675000  | -3.735270000 | -0.854435000 | C                             | 2.595597000  | 1.762141000  | 0.597145000  |
| H | 1.089688000  | -4.310836000 | 0.518194000  | C                             | 4.612396000  | 2.937771000  | 1.546123000  |
| H | 0.198452000  | -5.224945000 | -1.651801000 | C                             | 4.969346000  | -0.727258000 | -1.943058000 |
| H | -1.033369000 | -4.269031000 | -0.839110000 | C                             | 1.952749000  | -0.872251000 | -1.872786000 |
| H | -0.962019000 | -3.584771000 | -3.220870000 | C                             | 0.979817000  | -2.176871000 | 0.006891000  |
| H | 0.773149000  | -3.320442000 | -3.133660000 | C                             | 1.336785000  | -3.586749000 | -0.490560000 |
| H | -0.470183000 | -1.149717000 | -2.937729000 | C                             | 0.290510000  | -4.170674000 | -1.441497000 |
| H | -1.418597000 | -1.816479000 | -1.613912000 | C                             | 0.083479000  | -3.221218000 | -2.624070000 |
| H | -5.882328000 | 0.020491000  | -0.270966000 | C                             | -0.311047000 | -1.830804000 | -2.127839000 |
| H | -2.253230000 | 0.907386000  | -2.395712000 | C                             | -2.571470000 | -0.198972000 | 0.830452000  |
| H | -5.728925000 | 1.549701000  | -2.593674000 | C                             | -3.951515000 | -0.412055000 | 0.947349000  |
| H | -5.543356000 | -0.140440000 | -3.064925000 | C                             | -4.734164000 | -0.193088000 | -0.187037000 |
| H | -4.349338000 | 1.058147000  | -3.592604000 | C                             | -4.173433000 | 0.229913000  | -1.397258000 |
| H | -4.381400000 | -1.489777000 | 2.474981000  | C                             | -2.798076000 | 0.424448000  | -1.421351000 |
| H | -5.801976000 | -0.542786000 | 2.012863000  | C                             | -5.012664000 | 0.469829000  | -2.621863000 |
| H | -4.492119000 | 0.212824000  | 2.931381000  | C                             | -4.566280000 | -0.853666000 | 2.249540000  |
| H | -1.635288000 | 0.804007000  | 2.442357000  | C                             | -1.626122000 | -0.357852000 | 1.990724000  |
| H | -2.186374000 | -0.853230000 | 2.651974000  | C                             | -0.199042000 | -2.099489000 | 0.995168000  |
| H | -1.357469000 | -2.140196000 | 0.450148000  | C                             | -0.170038000 | -3.128341000 | 2.137314000  |
| H | -1.500146000 | -2.912718000 | 2.669743000  | C                             | 0.917329000  | -2.837207000 | 3.175393000  |
| H | -0.483461000 | -4.041383000 | 1.820744000  | C                             | 0.747718000  | -1.413195000 | 3.715097000  |

|   |              |              |              |                |              |              |              |
|---|--------------|--------------|--------------|----------------|--------------|--------------|--------------|
| C | 0.762762000  | -0.409909000 | 2.562373000  | H              | -2.231560000 | 3.746874000  | 2.337403000  |
| H | 5.820620000  | 1.195305000  | -0.197631000 | H              | -0.516086000 | 3.966577000  | 2.708796000  |
| H | 1.930948000  | 2.352415000  | 1.214286000  | <sup>3</sup> 2 |              |              |              |
| H | 5.160954000  | 3.685033000  | 0.964331000  | Mn             | 0.025179000  | -0.746953000 | -0.171598000 |
| H | 5.327479000  | 2.456596000  | 2.220166000  | N              | -2.021425000 | -0.541634000 | 0.084500000  |
| H | 3.863574000  | 3.454475000  | 2.149673000  | N              | -0.404563000 | 1.143083000  | -1.247069000 |
| H | 4.845841000  | -1.783115000 | -1.679529000 | N              | 2.096187000  | -0.664732000 | -0.283286000 |
| H | 6.028476000  | -0.480362000 | -1.856075000 | N              | 0.595589000  | 0.795900000  | 1.451927000  |
| H | 4.677510000  | -0.610642000 | -2.991148000 | C              | -2.648231000 | 0.254203000  | -0.807680000 |
| H | 1.672999000  | -0.370683000 | -2.803104000 | C              | -4.036358000 | 0.421580000  | -0.774420000 |
| H | 2.521012000  | -1.765359000 | -2.130122000 | C              | -4.738864000 | -0.270314000 | 0.213964000  |
| H | 1.864541000  | -1.762710000 | 0.491161000  | C              | -4.090516000 | -1.095255000 | 1.140177000  |
| H | 2.304879000  | -3.541853000 | -0.999105000 | C              | -2.708575000 | -1.204098000 | 1.031834000  |
| H | 1.496764000  | -4.226611000 | 0.379213000  | C              | -4.843707000 | -1.832579000 | 2.212160000  |
| H | 0.619555000  | -5.152627000 | -1.792105000 | C              | -4.739214000 | 1.303091000  | -1.771936000 |
| H | -0.661267000 | -4.323552000 | -0.917945000 | C              | -1.758464000 | 0.895289000  | -1.831838000 |
| H | -0.718979000 | -3.572525000 | -3.279213000 | C              | -0.458859000 | 2.263444000  | -0.218388000 |
| H | 0.990904000  | -3.170060000 | -3.235512000 | C              | -0.593372000 | 3.632076000  | -0.907562000 |
| H | -0.418106000 | -1.112594000 | -2.941314000 | C              | 0.477764000  | 3.876158000  | -1.971655000 |
| H | -1.268493000 | -1.892468000 | -1.612306000 | C              | 0.442939000  | 2.748192000  | -3.005806000 |
| H | -5.806451000 | -0.354861000 | -0.124899000 | C              | 0.616007000  | 1.391839000  | -2.321697000 |
| H | -2.276228000 | 0.767057000  | -2.305593000 | C              | 2.757594000  | -0.158054000 | 0.780543000  |
| H | -5.781923000 | 1.221901000  | -2.421675000 | C              | 4.156903000  | -0.114064000 | 0.798720000  |
| H | -5.523591000 | -0.449432000 | -2.924901000 | C              | 4.830090000  | -0.615876000 | -0.316969000 |
| H | -4.402672000 | 0.815425000  | -3.458737000 | C              | 4.144948000  | -1.149865000 | -1.413669000 |
| H | -4.175065000 | -1.827076000 | 2.563611000  | C              | 2.756889000  | -1.157468000 | -1.347406000 |
| H | -5.649185000 | -0.942046000 | 2.148819000  | C              | 4.866981000  | -1.697820000 | -2.613272000 |
| H | -4.356604000 | -0.139433000 | 3.051952000  | C              | 4.905745000  | 0.448443000  | 1.978175000  |
| H | -1.570350000 | 0.589914000  | 2.534994000  | C              | 1.908383000  | 0.297912000  | 1.935145000  |
| H | -2.001442000 | -1.106825000 | 2.690954000  | C              | 0.744903000  | 2.112644000  | 0.726939000  |
| H | -1.123068000 | -2.259771000 | 0.436729000  | C              | 0.959466000  | 3.275435000  | 1.710073000  |
| H | -1.148338000 | -3.111115000 | 2.629272000  | C              | -0.103764000 | 3.331505000  | 2.810017000  |
| H | -0.072891000 | -4.131805000 | 1.718191000  | C              | -0.154089000 | 1.990972000  | 3.549270000  |
| H | 0.855375000  | -3.567133000 | 3.987431000  | C              | -0.408807000 | 0.854198000  | 2.560023000  |
| H | 1.913945000  | -2.946585000 | 2.728654000  | H              | -5.818151000 | -0.161562000 | 0.264851000  |
| H | 1.556484000  | -1.153652000 | 4.404778000  | H              | -2.127872000 | -1.818276000 | 1.707386000  |
| H | -0.188740000 | -1.333834000 | 4.279225000  | H              | -5.605586000 | -2.481214000 | 1.769769000  |
| H | 0.597864000  | 0.613439000  | 2.904773000  | H              | -5.355865000 | -1.127292000 | 2.873977000  |
| H | 1.743178000  | -0.434194000 | 2.083495000  | H              | -4.174796000 | -2.447811000 | 2.816847000  |
| O | -0.108160000 | 1.457098000  | -1.908104000 | H              | -4.400861000 | 2.341299000  | -1.690970000 |
| O | -0.880655000 | 2.875657000  | -2.694095000 | H              | -5.816832000 | 1.286227000  | -1.602948000 |
| H | -0.048647000 | 3.176625000  | -3.093934000 | H              | -4.549375000 | 0.969815000  | -2.796740000 |
| O | -0.377244000 | 2.238547000  | 0.832182000  | H              | -1.641126000 | 0.217740000  | -2.682797000 |
| C | -0.945908000 | 3.349808000  | 0.714854000  | H              | -2.185625000 | 1.825017000  | -2.206359000 |
| O | -1.300036000 | 3.888717000  | -0.404998000 | H              | -1.371034000 | 2.090956000  | 0.353146000  |
| H | -1.075294000 | 3.403139000  | -1.293731000 | H              | -1.583831000 | 3.691282000  | -1.368902000 |
| C | -1.280935000 | 4.129121000  | 1.948851000  | H              | -0.585596000 | 4.406039000  | -0.137896000 |
| H | -1.393937000 | 5.188956000  | 1.723980000  | H              | 0.301686000  | 4.841364000  | -2.454030000 |



|       |              |              |              |   |              |              |              |
|-------|--------------|--------------|--------------|---|--------------|--------------|--------------|
| H     | 1.472176000  | 3.929240000  | -1.511826000 | C | -1.878476000 | 1.034221000  | -1.813636000 |
| H     | 1.252458000  | 2.851294000  | -3.734049000 | C | -0.754358000 | 2.252410000  | 0.032810000  |
| H     | -0.496038000 | 2.775934000  | -3.569184000 | C | -1.001850000 | 3.692660000  | -0.447273000 |
| H     | 0.541364000  | 0.562807000  | -3.026875000 | C | 0.062691000  | 4.189367000  | -1.427284000 |
| H     | 1.600689000  | 1.344699000  | -1.857571000 | C | 0.156195000  | 3.230331000  | -2.616839000 |
| H     | 5.915769000  | -0.590395000 | -0.330258000 | C | 0.443737000  | 1.809244000  | -2.131450000 |
| H     | 2.142460000  | -1.560020000 | -2.142557000 | C | 2.660289000  | -0.007572000 | 0.730982000  |
| H     | 5.506433000  | -2.538109000 | -2.325793000 | C | 4.051007000  | 0.140276000  | 0.792668000  |
| H     | 5.510043000  | -0.932255000 | -3.057782000 | C | 4.779236000  | -0.138434000 | -0.365675000 |
| H     | 4.165995000  | -2.044229000 | -3.375039000 | C | 4.154959000  | -0.555955000 | -1.545764000 |
| H     | 4.662567000  | 1.504560000  | 2.134522000  | C | 2.771110000  | -0.682294000 | -1.517243000 |
| H     | 5.981990000  | 0.371232000  | 1.817003000  | C | 4.934415000  | -0.859817000 | -2.795117000 |
| H     | 4.660495000  | -0.088663000 | 2.899364000  | C | 4.733947000  | 0.573620000  | 2.063061000  |
| H     | 1.719092000  | -0.553727000 | 2.596092000  | C | 1.762167000  | 0.207164000  | 1.917547000  |
| H     | 2.427031000  | 1.056057000  | 2.523068000  | C | 0.440964000  | 2.069010000  | 0.979752000  |
| H     | 1.648855000  | 2.021522000  | 0.122820000  | C | 0.522951000  | 3.070641000  | 2.144183000  |
| H     | 1.945867000  | 3.153297000  | 2.169172000  | C | -0.553844000 | 2.841636000  | 3.207560000  |
| H     | 1.013583000  | 4.210531000  | 1.149381000  | C | -0.478342000 | 1.399271000  | 3.716826000  |
| H     | 0.129005000  | 4.144051000  | 3.503655000  | C | -0.608029000 | 0.421859000  | 2.548780000  |
| H     | -1.089098000 | 3.554748000  | 2.381743000  | H | -5.864099000 | -0.694924000 | -0.043879000 |
| H     | -0.958268000 | 1.978141000  | 4.290710000  | H | -2.063072000 | -2.238669000 | 1.232558000  |
| H     | 0.782311000  | 1.823300000  | 4.093084000  | H | -5.456801000 | -3.210953000 | 1.084099000  |
| H     | -0.403318000 | -0.123270000 | 3.045858000  | H | -5.375439000 | -2.021086000 | 2.384867000  |
| H     | -1.392588000 | 0.987501000  | 2.108904000  | H | -4.064228000 | -3.196756000 | 2.181737000  |
| O     | -0.106959000 | -1.727156000 | -1.535927000 | H | -4.650349000 | 2.197992000  | -1.524745000 |
| O     | -2.638830000 | -2.420873000 | -2.661113000 | H | -5.961955000 | 1.020070000  | -1.660680000 |
| H     | -1.758890000 | -2.362449000 | -2.253912000 | H | -4.649348000 | 1.025691000  | -2.847146000 |
| O     | 0.133108000  | -2.168248000 | 1.064849000  | H | -1.665403000 | 0.516529000  | -2.752679000 |
| C     | 0.206669000  | -3.418757000 | 0.643535000  | H | -2.388689000 | 1.966835000  | -2.052683000 |
| O     | 0.148990000  | -3.728832000 | -0.546775000 | H | -1.657221000 | 1.914139000  | 0.542364000  |
| H     | -3.201116000 | -2.837502000 | -1.999081000 | H | -1.984222000 | 3.734093000  | -0.927177000 |
| C     | 0.364884000  | -4.440891000 | 1.736590000  | H | -1.080119000 | 4.338986000  | 0.429002000  |
| H     | 0.403690000  | -5.444155000 | 1.316056000  | H | -0.193598000 | 5.196388000  | -1.767400000 |
| H     | 1.283501000  | -4.222521000 | 2.287661000  | H | 1.038686000  | 4.261785000  | -0.931853000 |
| H     | -0.475732000 | -4.350483000 | 2.429468000  | H | 0.966869000  | 3.515148000  | -3.293601000 |
| $s^2$ |              |              |              | H | -0.769371000 | 3.257500000  | -3.202075000 |
| Mn    | 0.007592000  | -0.672752000 | -0.353284000 | H | 0.467412000  | 1.089397000  | -2.950883000 |
| N     | -2.044641000 | -0.718757000 | -0.167090000 | H | 1.417186000  | 1.787564000  | -1.642342000 |
| N     | -0.571158000 | 1.307962000  | -1.144435000 | H | 5.859506000  | -0.028446000 | -0.345439000 |
| N     | 2.056038000  | -0.404265000 | -0.411229000 | H | 2.201245000  | -1.010481000 | -2.377730000 |
| N     | 0.413874000  | 0.643758000  | 1.477563000  | H | 5.677078000  | -1.640587000 | -2.605388000 |
| C     | -2.725365000 | 0.154502000  | -0.941086000 | H | 5.472374000  | 0.029502000  | -3.137823000 |
| C     | -4.123722000 | 0.193143000  | -0.925318000 | H | 4.278261000  | -1.196159000 | -3.600129000 |
| C     | -4.778721000 | -0.703804000 | -0.078737000 | H | 4.389617000  | 1.563187000  | 2.381049000  |
| C     | -4.075180000 | -1.605523000 | 0.727592000  | H | 5.813941000  | 0.622977000  | 1.916573000  |
| C     | -2.687485000 | -1.577308000 | 0.646131000  | H | 4.533090000  | -0.125605000 | 2.880701000  |
| C     | -4.776852000 | -2.565235000 | 1.647845000  | H | 1.647028000  | -0.737460000 | 2.456621000  |
| C     | -4.887836000 | 1.162051000  | -1.788064000 | H | 2.200773000  | 0.924455000  | 2.612324000  |

|                               |              |              |              |   |              |              |              |
|-------------------------------|--------------|--------------|--------------|---|--------------|--------------|--------------|
| H                             | 1.359785000  | 2.165737000  | 0.399417000  | C | -1.085337000 | 3.477822000  | -1.277711000 |
| H                             | 1.510851000  | 2.973597000  | 2.605759000  | C | -0.036509000 | 3.733992000  | -2.363308000 |
| H                             | 0.487928000  | 4.085137000  | 1.742473000  | C | 0.055612000  | 2.517610000  | -3.290176000 |
| H                             | -0.412153000 | 3.547567000  | 4.030492000  | C | 0.354063000  | 1.255875000  | -2.480446000 |
| H                             | -1.551195000 | 3.035704000  | 2.793280000  | H | 5.824958000  | -0.076661000 | -0.413309000 |
| H                             | -1.285436000 | 1.186042000  | 4.423704000  | H | 2.130292000  | -1.577872000 | -2.004131000 |
| H                             | 0.464089000  | 1.234575000  | 4.251140000  | H | 5.607655000  | -2.216382000 | -2.163103000 |
| H                             | -0.512597000 | -0.617713000 | 2.865804000  | H | 5.344989000  | -0.753344000 | -3.114116000 |
| H                             | -1.593827000 | 0.536567000  | 2.097140000  | H | 4.168327000  | -2.076361000 | -3.189108000 |
| O                             | -0.017241000 | -1.247298000 | -2.056144000 | H | 4.413264000  | 2.176333000  | 1.835941000  |
| O                             | -0.850883000 | -3.261017000 | -2.340002000 | H | 5.834370000  | 1.147563000  | 1.608782000  |
| H                             | -1.720687000 | -3.141665000 | -1.933279000 | H | 4.578331000  | 0.683086000  | 2.765917000  |
| O                             | 0.233002000  | -2.172643000 | 0.743695000  | H | 1.721131000  | -0.043061000 | 2.609660000  |
| C                             | 0.737379000  | -3.393030000 | 0.643692000  | H | 2.205561000  | 1.617192000  | 2.281403000  |
| O                             | 0.771173000  | -4.028110000 | -0.405517000 | H | 1.306659000  | 2.190436000  | -0.139671000 |
| H                             | -0.232807000 | -3.583433000 | -1.626565000 | H | 1.501391000  | 3.541807000  | 1.785452000  |
| C                             | 1.264683000  | -3.929035000 | 1.947645000  | H | 0.449016000  | 4.384725000  | 0.688462000  |
| H                             | 1.435788000  | -5.002222000 | 1.871940000  | H | -0.398644000 | 4.452795000  | 3.057027000  |
| H                             | 2.211329000  | -3.426227000 | 2.172417000  | H | -1.555875000 | 3.629671000  | 2.020195000  |
| H                             | 0.568774000  | -3.704718000 | 2.758701000  | H | -1.230178000 | 2.266548000  | 4.067653000  |
| <sup>3</sup> TS <sub>23</sub> |              |              |              | H | 0.513933000  | 2.283105000  | 3.846624000  |
| Mn                            | -0.011491000 | -0.714825000 | 0.002612000  | H | -0.468253000 | 0.129682000  | 3.019774000  |
| N                             | 2.027231000  | -0.485564000 | -0.249456000 | H | -1.583173000 | 1.031998000  | 2.000236000  |
| N                             | 0.405708000  | 0.984178000  | 1.315603000  | H | -5.918250000 | -0.741831000 | 0.187954000  |
| N                             | -2.093899000 | -0.719221000 | 0.129875000  | H | -2.118401000 | -1.838213000 | 1.864667000  |
| N                             | -0.636249000 | 1.000320000  | -1.387296000 | H | -5.491834000 | -2.878680000 | 1.930919000  |
| C                             | 2.660801000  | 0.207390000  | 0.720732000  | H | -5.460536000 | -1.391526000 | 2.879997000  |
| C                             | 4.049291000  | 0.379267000  | 0.697247000  | H | -4.124398000 | -2.548627000 | 3.010008000  |
| C                             | 4.746134000  | -0.193596000 | -0.368043000 | H | -4.737551000 | 1.681342000  | -1.980601000 |
| C                             | 4.092471000  | -0.912032000 | -1.376087000 | H | -6.014442000 | 0.467974000  | -1.827811000 |
| C                             | 2.712049000  | -1.035391000 | -1.269263000 | H | -4.674383000 | 0.207449000  | -2.952865000 |
| C                             | 4.840076000  | -1.526660000 | -2.526879000 | H | -1.733130000 | -0.198749000 | -2.713311000 |
| C                             | 4.758050000  | 1.138185000  | 1.787029000  | H | -2.480920000 | 1.363100000  | -2.408270000 |
| C                             | 1.784277000  | 0.720004000  | 1.828494000  | H | -1.703400000 | 1.984704000  | 0.120550000  |
| C                             | 0.400665000  | 2.247118000  | 0.464916000  | H | -2.071275000 | 3.385847000  | -1.745018000 |
| C                             | 0.503312000  | 3.508728000  | 1.337418000  | H | -1.168766000 | 4.319229000  | -0.587015000 |
| C                             | -0.548054000 | 3.557290000  | 2.447701000  | H | -0.305019000 | 4.629253000  | -2.930959000 |
| C                             | -0.441472000 | 2.296855000  | 3.310252000  | H | 0.944198000  | 3.929444000  | -1.911341000 |
| C                             | -0.586836000 | 1.048154000  | 2.442170000  | H | 0.854477000  | 2.642226000  | -4.027165000 |
| C                             | -2.774139000 | -0.094042000 | -0.855520000 | H | -0.878025000 | 2.400039000  | -3.851868000 |
| C                             | -4.174476000 | -0.083392000 | -0.870768000 | H | 0.373718000  | 0.363377000  | -3.108833000 |
| C                             | -4.832225000 | -0.738828000 | 0.171696000  | H | 1.338611000  | 1.349202000  | -2.020495000 |
| C                             | -4.130436000 | -1.388382000 | 1.193044000  | O | 0.167828000  | -1.987854000 | 1.224320000  |
| C                             | -2.742878000 | -1.354777000 | 1.123706000  | O | 2.623798000  | -2.431659000 | 2.642540000  |
| C                             | -4.835922000 | -2.093177000 | 2.318497000  | H | 1.785817000  | -2.419286000 | 2.151671000  |
| C                             | -4.941272000 | 0.605378000  | -1.969135000 | O | -0.113273000 | -2.257093000 | -1.319832000 |
| C                             | -1.939602000 | 0.542811000  | -1.934677000 | C | -0.075900000 | -3.381357000 | -0.741977000 |
| C                             | -0.814785000 | 2.193566000  | -0.477420000 | O | 0.042261000  | -3.491443000 | 0.535372000  |

|                               |              |              |              |                |              |              |              |
|-------------------------------|--------------|--------------|--------------|----------------|--------------|--------------|--------------|
| H                             | 3.290979000  | -2.711185000 | 2.006131000  | H              | -1.710125000 | 3.749334000  | -1.214096000 |
| C                             | -0.156027000 | -4.657499000 | -1.518323000 | H              | -0.768552000 | 4.417113000  | 0.086975000  |
| H                             | -0.180838000 | -5.523209000 | -0.859052000 | H              | 0.162863000  | 5.023090000  | -2.172806000 |
| H                             | -1.052013000 | -4.623778000 | -2.142634000 | H              | 1.338851000  | 4.091769000  | -1.256886000 |
| H                             | 0.718866000  | -4.707806000 | -2.172745000 | H              | 1.215008000  | 3.149944000  | -3.545399000 |
| <sup>5</sup> TS <sub>23</sub> |              |              |              | H              | -0.533337000 | 3.005160000  | -3.435393000 |
| Mn                            | 0.002420000  | -0.717840000 | -0.216895000 | H              | 0.568913000  | 0.795742000  | -2.992433000 |
| N                             | -2.041652000 | -0.616295000 | -0.068024000 | H              | 1.563609000  | 1.545963000  | -1.749255000 |
| N                             | -0.449981000 | 1.237657000  | -1.217713000 | H              | 5.880317000  | -0.357026000 | -0.327521000 |
| N                             | 2.066054000  | -0.562556000 | -0.328163000 | H              | 2.162997000  | -1.328935000 | -2.246965000 |
| N                             | 0.499582000  | 0.736625000  | 1.467754000  | H              | 5.595929000  | -2.137202000 | -2.449747000 |
| C                             | -2.666052000 | 0.236754000  | -0.912227000 | H              | 5.467514000  | -0.503652000 | -3.105322000 |
| C                             | -4.057732000 | 0.376487000  | -0.893295000 | H              | 4.210889000  | -1.700422000 | -3.466911000 |
| C                             | -4.766324000 | -0.395132000 | 0.030978000  | H              | 4.526449000  | 1.526146000  | 2.259555000  |
| C                             | -4.121519000 | -1.273163000 | 0.910832000  | H              | 5.893796000  | 0.472120000  | 1.876808000  |
| C                             | -2.736927000 | -1.353328000 | 0.821634000  | H              | 4.584873000  | -0.115399000 | 2.912018000  |
| C                             | -4.882575000 | -2.097752000 | 1.910724000  | H              | 1.650092000  | -0.645591000 | 2.545060000  |
| C                             | -4.761518000 | 1.319840000  | -1.832346000 | H              | 2.304386000  | 0.990463000  | 2.583135000  |
| C                             | -1.766985000 | 0.970675000  | -1.864654000 | H              | 1.533080000  | 2.090037000  | 0.252034000  |
| C                             | -0.572591000 | 2.285321000  | -0.127170000 | H              | 1.747523000  | 3.084393000  | 2.376642000  |
| C                             | -0.731169000 | 3.692151000  | -0.728309000 | H              | 0.794203000  | 4.175826000  | 1.413810000  |
| C                             | 0.358694000  | 4.035595000  | -1.746212000 | H              | -0.129715000 | 3.910578000  | 3.738910000  |
| C                             | 0.390936000  | 2.973211000  | -2.848274000 | H              | -1.303864000 | 3.359738000  | 2.552132000  |
| C                             | 0.591165000  | 1.585169000  | -2.239650000 | H              | -1.149893000 | 1.655939000  | 4.347668000  |
| C                             | 2.700060000  | -0.103551000 | 0.774236000  | H              | 0.598548000  | 1.578026000  | 4.176269000  |
| C                             | 4.096607000  | -0.014898000 | 0.810634000  | H              | -0.497282000 | -0.330022000 | 2.968377000  |
| C                             | 4.796115000  | -0.419885000 | -0.327947000 | H              | -1.507687000 | 0.813812000  | 2.091843000  |
| C                             | 4.139864000  | -0.902194000 | -1.465761000 | O              | 0.033104000  | -1.625673000 | -1.782379000 |
| C                             | 2.752218000  | -0.960508000 | -1.414614000 | O              | -1.810720000 | -3.024395000 | -2.197383000 |
| C                             | 4.890388000  | -1.337319000 | -2.693549000 | H              | -2.566964000 | -2.883884000 | -1.612889000 |
| C                             | 4.814283000  | 0.494275000  | 2.032786000  | O              | 0.160903000  | -2.160158000 | 0.958498000  |
| C                             | 1.822596000  | 0.251192000  | 1.942538000  | C              | 0.373631000  | -3.435083000 | 0.610316000  |
| C                             | 0.612781000  | 2.107829000  | 0.837311000  | O              | 0.121243000  | -3.872993000 | -0.500874000 |
| C                             | 0.765752000  | 3.202282000  | 1.906828000  | H              | -1.104506000 | -3.416469000 | -1.637063000 |
| C                             | -0.319273000 | 3.142008000  | 2.984673000  | C              | 0.961247000  | -4.249093000 | 1.731850000  |
| C                             | -0.333101000 | 1.751681000  | 3.626391000  | H              | 1.031074000  | -5.296004000 | 1.439522000  |
| C                             | -0.529513000 | 0.679239000  | 2.554795000  | H              | 1.955431000  | -3.858328000 | 1.969300000  |
| H                             | -5.847874000 | -0.306058000 | 0.068777000  | H              | 0.344205000  | -4.144401000 | 2.627818000  |
| H                             | -2.155878000 | -2.004466000 | 1.461711000  | <sup>3</sup> B |              |              |              |
| H                             | -5.589745000 | -2.759957000 | 1.402183000  | Mn             | -0.024103000 | -0.566307000 | -0.042262000 |
| H                             | -5.459002000 | -1.451762000 | 2.579667000  | N              | 1.977764000  | -0.458773000 | -0.308800000 |
| H                             | -4.210485000 | -2.709437000 | 2.515254000  | N              | 0.399864000  | 0.942470000  | 1.296586000  |
| H                             | -4.464237000 | 2.357100000  | -1.645682000 | N              | -2.038743000 | -0.653653000 | 0.161413000  |
| H                             | -5.842240000 | 1.250902000  | -1.700976000 | N              | -0.579693000 | 0.979624000  | -1.326877000 |
| H                             | -4.529284000 | 1.089210000  | -2.876230000 | C              | 2.635528000  | 0.136818000  | 0.703593000  |
| H                             | -1.581802000 | 0.343177000  | -2.741516000 | C              | 4.032596000  | 0.219182000  | 0.717894000  |
| H                             | -2.225879000 | 1.897314000  | -2.208689000 | C              | 4.713370000  | -0.348940000 | -0.359783000 |
| H                             | -1.493302000 | 2.049029000  | 0.407688000  | C              | 4.034220000  | -0.976748000 | -1.411541000 |

|   |              |              |              |           |              |              |              |
|---|--------------|--------------|--------------|-----------|--------------|--------------|--------------|
| C | 2.646766000  | -1.008700000 | -1.337823000 | H         | -4.601994000 | 0.123401000  | -2.971407000 |
| C | 4.765546000  | -1.590781000 | -2.573098000 | H         | -1.674987000 | -0.189244000 | -2.688700000 |
| C | 4.761789000  | 0.878791000  | 1.857423000  | H         | -2.399187000 | 1.385182000  | -2.383807000 |
| C | 1.764700000  | 0.636615000  | 1.817680000  | H         | -1.669940000 | 2.014351000  | 0.135326000  |
| C | 0.429400000  | 2.241545000  | 0.506020000  | H         | -2.004326000 | 3.403364000  | -1.733274000 |
| C | 0.529456000  | 3.475831000  | 1.414789000  | H         | -1.075868000 | 4.329218000  | -0.590037000 |
| C | -0.514780000 | 3.492683000  | 2.532745000  | H         | -0.226845000 | 4.588320000  | -2.948991000 |
| C | -0.414781000 | 2.199427000  | 3.345746000  | H         | 1.018348000  | 3.896833000  | -1.918159000 |
| C | -0.590630000 | 0.991777000  | 2.428239000  | H         | 0.910501000  | 2.567702000  | -4.005530000 |
| C | -2.729739000 | -0.078479000 | -0.841475000 | H         | -0.821818000 | 2.339517000  | -3.819775000 |
| C | -4.128103000 | -0.112565000 | -0.877691000 | H         | 0.447364000  | 0.319514000  | -3.032634000 |
| C | -4.774087000 | -0.771672000 | 0.169515000  | H         | 1.396232000  | 1.344029000  | -1.963448000 |
| C | -4.060179000 | -1.378775000 | 1.210165000  | O         | 0.199843000  | -1.976759000 | 1.174527000  |
| C | -2.673896000 | -1.295907000 | 1.158671000  | O         | 2.593218000  | -2.545728000 | 2.598688000  |
| C | -4.754946000 | -2.090266000 | 2.338094000  | H         | 3.262292000  | -2.792248000 | 1.950824000  |
| C | -4.895906000 | 0.533202000  | -2.000178000 | O         | -0.177535000 | -2.044493000 | -1.352785000 |
| C | -1.883637000 | 0.550041000  | -1.909093000 | C         | -0.212480000 | -3.160488000 | -0.787296000 |
| C | -0.769061000 | 2.204716000  | -0.450336000 | O         | -0.061499000 | -3.280252000 | 0.504899000  |
| C | -1.014181000 | 3.478511000  | -1.271960000 | H         | 1.765469000  | -2.451358000 | 2.095893000  |
| C | 0.034703000  | 3.702550000  | -2.363744000 | C         | -0.429336000 | -4.438286000 | -1.522094000 |
| C | 0.113344000  | 2.465926000  | -3.263293000 | H         | -0.419801000 | -5.291978000 | -0.846772000 |
| C | 0.417327000  | 1.225776000  | -2.425326000 | H         | -1.388486000 | -4.376482000 | -2.042987000 |
| H | 5.798341000  | -0.303580000 | -0.379916000 | H         | 0.360129000  | -4.539706000 | -2.271751000 |
| H | 2.047581000  | -1.476402000 | -2.108678000 | <b>53</b> |              |              |              |
| H | 5.472084000  | -2.350562000 | -2.225484000 | Mn        | -0.038553000 | -0.593149000 | -0.122966000 |
| H | 5.339912000  | -0.830434000 | -3.111478000 | N         | 1.989863000  | -0.451758000 | -0.369042000 |
| H | 4.073810000  | -2.059367000 | -3.275928000 | N         | 0.494966000  | 1.009421000  | 1.363709000  |
| H | 4.491091000  | 1.936742000  | 1.941670000  | N         | -2.064539000 | -0.674218000 | 0.050453000  |
| H | 5.840835000  | 0.817040000  | 1.708308000  | N         | -0.578152000 | 1.058583000  | -1.317766000 |
| H | 4.521270000  | 0.398780000  | 2.811075000  | C         | 2.679934000  | 0.167877000  | 0.607343000  |
| H | 1.678782000  | -0.145373000 | 2.577680000  | C         | 4.080093000  | 0.238579000  | 0.564872000  |
| H | 2.200499000  | 1.510795000  | 2.301546000  | C         | 4.721357000  | -0.361850000 | -0.518101000 |
| H | 1.343660000  | 2.199059000  | -0.087644000 | C         | 4.005409000  | -1.018032000 | -1.527583000 |
| H | 1.529866000  | 3.496833000  | 1.858822000  | C         | 2.622969000  | -1.039378000 | -1.402704000 |
| H | 0.470279000  | 4.371192000  | 0.792588000  | C         | 4.693365000  | -1.669340000 | -2.695069000 |
| H | -0.353018000 | 4.364042000  | 3.173059000  | C         | 4.858386000  | 0.921730000  | 1.657362000  |
| H | -1.525031000 | 3.589204000  | 2.115726000  | C         | 1.884921000  | 0.713973000  | 1.767386000  |
| H | -1.196654000 | 2.150196000  | 4.109231000  | C         | 0.440417000  | 2.290235000  | 0.573695000  |
| H | 0.545009000  | 2.152371000  | 3.872201000  | C         | 0.517061000  | 3.529566000  | 1.480198000  |
| H | -0.498875000 | 0.047244000  | 2.966966000  | C         | -0.504021000 | 3.501387000  | 2.620162000  |
| H | -1.587117000 | 1.025853000  | 1.990237000  | C         | -0.324991000 | 2.216313000  | 3.434333000  |
| H | -5.859460000 | -0.813220000 | 0.174892000  | C         | -0.450902000 | 0.998804000  | 2.520817000  |
| H | -2.041002000 | -1.741534000 | 1.915391000  | C         | -2.741035000 | -0.027899000 | -0.920583000 |
| H | -5.367920000 | -2.912486000 | 1.956333000  | C         | -4.138841000 | -0.022875000 | -0.952640000 |
| H | -5.420679000 | -1.405668000 | 2.872686000  | C         | -4.798346000 | -0.708099000 | 0.070524000  |
| H | -4.037082000 | -2.498833000 | 3.051978000  | C         | -4.099992000 | -1.370965000 | 1.086816000  |
| H | -4.717814000 | 1.613433000  | -2.030003000 | C         | -2.711423000 | -1.328555000 | 1.031641000  |
| H | -5.967464000 | 0.371402000  | -1.873410000 | C         | -4.811064000 | -2.098668000 | 2.193728000  |

|   |              |              |              |                                                                                                                           |              |              |              |
|---|--------------|--------------|--------------|---------------------------------------------------------------------------------------------------------------------------|--------------|--------------|--------------|
| C | -4.895336000 | 0.691133000  | -2.040902000 | O                                                                                                                         | -0.151393000 | -2.494388000 | -1.338975000 |
| C | -1.874176000 | 0.643914000  | -1.944079000 | C                                                                                                                         | -0.253087000 | -3.459160000 | -0.587149000 |
| C | -0.785044000 | 2.225350000  | -0.357606000 | O                                                                                                                         | -0.133826000 | -3.340030000 | 0.738534000  |
| C | -1.096699000 | 3.522210000  | -1.120029000 | H                                                                                                                         | 1.808234000  | -2.386572000 | 2.050376000  |
| C | -0.048963000 | 3.854011000  | -2.185264000 | C                                                                                                                         | -0.527063000 | -4.864631000 | -1.012228000 |
| C | 0.101248000  | 2.674475000  | -3.150050000 | H                                                                                                                         | -0.602663000 | -5.535679000 | -0.157829000 |
| C | 0.432520000  | 1.393637000  | -2.385232000 | H                                                                                                                         | -1.456926000 | -4.876743000 | -1.586111000 |
| H | 5.805247000  | -0.321757000 | -0.575886000 | H                                                                                                                         | 0.284884000  | -5.187087000 | -1.669609000 |
| H | 1.994626000  | -1.532729000 | -2.134793000 | <b>Part II Hydroxylation of PBA to 4-OH-PBA by the proximal and distal oxygen of the Mn<sup>III</sup>(OOH) species 1.</b> |              |              |              |
| H | 5.417600000  | -2.413432000 | -2.350076000 | <sup>3</sup> RC                                                                                                           |              |              |              |
| H | 5.241335000  | -0.925691000 | -3.282191000 | Mn                                                                                                                        | 0.885752000  | 0.312146000  | -0.221143000 |
| H | 3.976594000  | -2.164855000 | -3.352918000 | N                                                                                                                         | 2.264155000  | 1.828269000  | 0.113894000  |
| H | 4.596092000  | 1.982714000  | 1.728342000  | N                                                                                                                         | 2.537537000  | -0.369116000 | -1.365831000 |
| H | 5.929912000  | 0.850851000  | 1.464125000  | N                                                                                                                         | -0.363168000 | -1.304345000 | -0.497386000 |
| H | 4.656771000  | 0.466046000  | 2.631791000  | N                                                                                                                         | 1.688876000  | -1.146488000 | 1.267154000  |
| H | 1.870496000  | -0.044823000 | 2.556170000  | C                                                                                                                         | 3.233495000  | 1.918673000  | -0.820421000 |
| H | 2.380393000  | 1.594166000  | 2.183390000  | C                                                                                                                         | 4.206798000  | 2.923881000  | -0.770687000 |
| H | 1.337225000  | 2.290462000  | -0.047622000 | C                                                                                                                         | 4.135874000  | 3.827177000  | 0.290892000  |
| H | 1.524586000  | 3.570503000  | 1.907584000  | C                                                                                                                         | 3.143833000  | 3.729273000  | 1.273293000  |
| H | 0.421885000  | 4.430413000  | 0.871015000  | C                                                                                                                         | 2.221127000  | 2.698076000  | 1.138297000  |
| H | -0.371639000 | 4.382328000  | 3.254498000  | C                                                                                                                         | 3.072088000  | 4.689283000  | 2.428420000  |
| H | -1.526372000 | 3.548627000  | 2.223187000  | C                                                                                                                         | 5.283541000  | 3.020898000  | -1.818539000 |
| H | -1.082687000 | 2.136251000  | 4.219594000  | C                                                                                                                         | 3.170471000  | 0.877107000  | -1.902463000 |
| H | 0.652039000  | 2.219179000  | 3.931879000  | C                                                                                                                         | 3.493224000  | -1.074150000 | -0.406182000 |
| H | -0.286428000 | 0.062936000  | 3.058754000  | C                                                                                                                         | 4.651131000  | -1.744106000 | -1.161501000 |
| H | -1.465408000 | 0.962100000  | 2.116973000  | C                                                                                                                         | 4.178846000  | -2.669847000 | -2.284972000 |
| H | -5.884347000 | -0.720271000 | 0.078518000  | C                                                                                                                         | 3.280316000  | -1.892497000 | -3.250790000 |
| H | -2.088902000 | -1.813427000 | 1.772841000  | C                                                                                                                         | 2.109667000  | -1.264719000 | -2.496415000 |
| H | -5.448492000 | -2.889737000 | 1.787079000  | C                                                                                                                         | -0.345565000 | -2.255634000 | 0.461260000  |
| H | -5.454958000 | -1.412862000 | 2.752797000  | C                                                                                                                         | -1.090753000 | -3.433370000 | 0.328576000  |
| H | -4.102893000 | -2.550907000 | 2.890635000  | C                                                                                                                         | -1.858542000 | -3.578530000 | -0.827083000 |
| H | -4.704667000 | 1.769189000  | -2.011869000 | C                                                                                                                         | -1.895678000 | -2.586796000 | -1.812578000 |
| H | -5.969018000 | 0.536251000  | -1.924424000 | C                                                                                                                         | -1.124276000 | -1.451991000 | -1.596668000 |
| H | -4.604216000 | 0.329423000  | -3.031626000 | C                                                                                                                         | -2.730343000 | -2.734960000 | -3.053305000 |
| H | -1.644403000 | -0.056349000 | -2.753728000 | C                                                                                                                         | -1.062096000 | -4.505418000 | 1.385464000  |
| H | -2.378807000 | 1.498423000  | -2.393632000 | C                                                                                                                         | 0.500056000  | -1.945261000 | 1.668362000  |
| H | -1.662287000 | 1.966284000  | 0.236802000  | C                                                                                                                         | 2.656861000  | -2.006208000 | 0.486137000  |
| H | -2.078150000 | 3.424010000  | -1.594016000 | C                                                                                                                         | 3.456892000  | -2.948349000 | 1.400244000  |
| H | -1.206718000 | 4.330719000  | -0.394882000 | C                                                                                                                         | 4.128681000  | -2.224504000 | 2.569623000  |
| H | -0.348650000 | 4.754523000  | -2.728112000 | C                                                                                                                         | 3.073623000  | -1.451847000 | 3.366660000  |
| H | 0.917776000  | 4.075243000  | -1.716646000 | C                                                                                                                         | 2.327100000  | -0.486573000 | 2.447353000  |
| H | 0.911969000  | 2.848412000  | -3.863496000 | H                                                                                                                         | 4.876400000  | 4.618757000  | 0.359084000  |
| H | -0.813280000 | 2.545716000  | -3.738948000 | H                                                                                                                         | 1.435606000  | 2.547021000  | 1.866351000  |
| H | 0.494814000  | 0.530052000  | -3.049439000 | H                                                                                                                         | 2.932890000  | 5.713684000  | 2.069330000  |
| H | 1.400533000  | 1.501618000  | -1.899295000 | H                                                                                                                         | 4.001207000  | 4.667581000  | 3.006041000  |
| O | 0.190229000  | -2.004266000 | 1.177084000  | H                                                                                                                         | 2.244757000  | 4.445075000  | 3.097770000  |
| O | 2.654159000  | -2.469970000 | 2.523856000  | H                                                                                                                         | 5.927304000  | 2.134901000  | -1.805313000 |
| H | 3.294260000  | -2.752210000 | 1.861514000  |                                                                                                                           |              |              |              |

|   |              |              |              |                 |              |              |              |
|---|--------------|--------------|--------------|-----------------|--------------|--------------|--------------|
| H | 5.911619000  | 3.895323000  | -1.641503000 | C               | -4.443763000 | -3.312589000 | 1.722495000  |
| H | 4.857351000  | 3.104922000  | -2.822789000 | H               | -3.098010000 | -2.303819000 | 3.074213000  |
| H | 2.548012000  | 1.230765000  | -2.728757000 | H               | -2.825377000 | -0.328568000 | 1.622129000  |
| H | 4.160903000  | 0.664548000  | -2.303492000 | H               | -5.514654000 | -2.040775000 | -1.247482000 |
| H | 3.914835000  | -0.284999000 | 0.217934000  | H               | -5.757218000 | -4.049777000 | 0.179426000  |
| H | 5.291741000  | -0.962639000 | -1.582354000 | H               | -4.550426000 | -4.191531000 | 2.350396000  |
| H | 5.276178000  | -2.271967000 | -0.438605000 | C               | -4.002634000 | 0.187732000  | -0.779731000 |
| H | 5.044487000  | -3.079997000 | -2.812264000 | H               | -2.968001000 | 0.546278000  | -0.740337000 |
| H | 3.626017000  | -3.523199000 | -1.872688000 | H               | -4.207484000 | -0.061247000 | -1.826773000 |
| H | 2.861883000  | -2.550991000 | -4.017659000 | C               | -4.940407000 | 1.322067000  | -0.335914000 |
| H | 3.859675000  | -1.125251000 | -3.775832000 | H               | -4.772539000 | 1.540456000  | 0.724410000  |
| H | 1.472363000  | -0.663435000 | -3.146298000 | H               | -5.981361000 | 0.995323000  | -0.431690000 |
| H | 1.494268000  | -2.056394000 | -2.071786000 | C               | -4.711590000 | 2.600622000  | -1.165598000 |
| H | -2.450281000 | -4.479296000 | -0.955845000 | H               | -3.671460000 | 2.920749000  | -1.071685000 |
| H | -1.092685000 | -0.630886000 | -2.302413000 | H               | -4.928817000 | 2.405250000  | -2.219270000 |
| H | -3.771869000 | -2.937316000 | -2.788416000 | C               | -5.582430000 | 3.723905000  | -0.666338000 |
| H | -2.375510000 | -3.573598000 | -3.660833000 | O               | -6.815054000 | 3.708159000  | -1.223543000 |
| H | -2.697568000 | -1.831105000 | -3.665130000 | H               | -7.339697000 | 4.423677000  | -0.827927000 |
| H | -0.065473000 | -4.952670000 | 1.466973000  | O               | -5.261609000 | 4.542632000  | 0.170719000  |
| H | -1.770136000 | -5.298288000 | 1.139806000  | <sup>5</sup> RC |              |              |              |
| H | -1.332108000 | -4.107678000 | 2.366952000  | Mn              | 0.877804000  | 0.285588000  | -0.169573000 |
| H | -0.083371000 | -1.343190000 | 2.370978000  | N               | 2.269135000  | 1.843307000  | 0.121411000  |
| H | 0.792974000  | -2.859426000 | 2.186027000  | N               | 2.633784000  | -0.372812000 | -1.422176000 |
| H | 2.040518000  | -2.631080000 | -0.161808000 | N               | -0.383796000 | -1.317662000 | -0.471718000 |
| H | 2.767078000  | -3.700836000 | 1.796502000  | N               | 1.700895000  | -1.115643000 | 1.197881000  |
| H | 4.179253000  | -3.503738000 | 0.798721000  | C               | 3.237960000  | 1.933763000  | -0.809179000 |
| H | 4.639436000  | -2.951208000 | 3.207679000  | C               | 4.184802000  | 2.968449000  | -0.776003000 |
| H | 4.896387000  | -1.531062000 | 2.203008000  | C               | 4.084745000  | 3.897079000  | 0.260071000  |
| H | 3.533457000  | -0.868271000 | 4.169881000  | C               | 3.084632000  | 3.803650000  | 1.234506000  |
| H | 2.374402000  | -2.149649000 | 3.841700000  | C               | 2.191748000  | 2.745931000  | 1.116089000  |
| H | 1.536393000  | 0.053531000  | 2.971151000  | C               | 2.974935000  | 4.794323000  | 2.360515000  |
| H | 3.030995000  | 0.255476000  | 2.067416000  | C               | 5.266762000  | 3.075062000  | -1.818329000 |
| O | 0.175348000  | 1.180534000  | -1.699385000 | C               | 3.229996000  | 0.890534000  | -1.899500000 |
| O | -0.235262000 | 2.576562000  | -1.542803000 | C               | 3.546722000  | -1.082192000 | -0.460490000 |
| H | 0.558493000  | 3.084857000  | -1.772958000 | C               | 4.708091000  | -1.782644000 | -1.184192000 |
| O | -0.409014000 | 1.010805000  | 1.326369000  | C               | 4.234831000  | -2.699750000 | -2.315945000 |
| C | -1.235191000 | 1.920356000  | 1.535514000  | C               | 3.369737000  | -1.903638000 | -3.298872000 |
| O | -1.529030000 | 2.845868000  | 0.667304000  | C               | 2.207254000  | -1.242956000 | -2.558421000 |
| H | -0.995140000 | 2.762857000  | -0.188412000 | C               | -0.344946000 | -2.263490000 | 0.487159000  |
| C | -1.940658000 | 2.031120000  | 2.848985000  | C               | -1.088845000 | -3.442736000 | 0.376241000  |
| H | -1.506559000 | 2.872764000  | 3.399185000  | C               | -1.864742000 | -3.598252000 | -0.773724000 |
| H | -2.998650000 | 2.249665000  | 2.691528000  | C               | -1.906272000 | -2.618867000 | -1.771709000 |
| H | -1.812048000 | 1.118404000  | 3.427976000  | C               | -1.139951000 | -1.476778000 | -1.569103000 |
| C | -3.627500000 | -2.254526000 | 2.127440000  | C               | -2.741858000 | -2.784614000 | -3.009460000 |
| C | -3.477870000 | -1.135652000 | 1.308830000  | C               | -1.057093000 | -4.497680000 | 1.449393000  |
| C | -4.148083000 | -1.043101000 | 0.082288000  | C               | 0.529323000  | -1.924480000 | 1.659779000  |
| C | -4.979868000 | -2.101341000 | -0.303440000 | C               | 2.671182000  | -1.994086000 | 0.419412000  |
| C | -5.119555000 | -3.232594000 | 0.502861000  | C               | 3.438729000  | -2.946790000 | 1.349069000  |

|   |              |              |              |                                |              |              |              |
|---|--------------|--------------|--------------|--------------------------------|--------------|--------------|--------------|
| C | 4.130227000  | -2.225733000 | 2.507953000  | C                              | -1.938001000 | 1.743802000  | 3.182356000  |
| C | 3.098303000  | -1.413007000 | 3.294233000  | H                              | -1.520390000 | 2.576761000  | 3.758753000  |
| C | 2.366712000  | -0.443680000 | 2.367024000  | H                              | -3.015355000 | 1.895978000  | 3.105480000  |
| H | 4.805511000  | 4.708121000  | 0.312131000  | H                              | -1.710496000 | 0.810884000  | 3.696299000  |
| H | 1.397241000  | 2.598847000  | 1.835147000  | C                              | -3.616656000 | -2.137905000 | 2.061554000  |
| H | 2.825365000  | 5.806168000  | 1.971156000  | C                              | -3.514124000 | -1.062190000 | 1.181556000  |
| H | 3.892715000  | 4.805077000  | 2.956523000  | C                              | -4.229494000 | -1.038368000 | -0.022733000 |
| H | 2.139226000  | 4.553993000  | 3.021014000  | C                              | -5.058176000 | -2.125867000 | -0.323165000 |
| H | 5.927889000  | 2.202095000  | -1.793820000 | C                              | -5.152709000 | -3.215824000 | 0.545306000  |
| H | 5.876289000  | 3.963493000  | -1.645465000 | C                              | -4.433243000 | -3.225072000 | 1.741908000  |
| H | 4.846837000  | 3.141816000  | -2.826662000 | H                              | -3.050624000 | -2.131789000 | 2.988294000  |
| H | 2.621228000  | 1.253521000  | -2.733818000 | H                              | -2.859919000 | -0.234398000 | 1.425938000  |
| H | 4.241838000  | 0.742687000  | -2.282698000 | H                              | -5.626992000 | -2.121901000 | -1.249050000 |
| H | 3.977092000  | -0.305899000 | 0.174874000  | H                              | -5.790324000 | -4.056066000 | 0.287538000  |
| H | 5.361306000  | -1.008592000 | -1.601403000 | H                              | -4.505224000 | -4.071709000 | 2.417287000  |
| H | 5.319641000  | -2.319991000 | -0.456473000 | C                              | -4.118072000 | 0.144520000  | -0.955041000 |
| H | 5.099920000  | -3.132034000 | -2.826860000 | H                              | -3.065087000 | 0.426827000  | -1.066889000 |
| H | 3.655242000  | -3.539833000 | -1.911919000 | H                              | -4.476041000 | -0.133378000 | -1.952356000 |
| H | 2.957088000  | -2.553478000 | -4.076585000 | C                              | -4.902597000 | 1.368231000  | -0.455675000 |
| H | 3.978512000  | -1.146557000 | -3.806704000 | H                              | -4.558355000 | 1.638301000  | 0.548160000  |
| H | 1.597783000  | -0.625328000 | -3.221596000 | H                              | -5.965492000 | 1.117537000  | -0.374900000 |
| H | 1.554884000  | -2.020921000 | -2.156986000 | C                              | -4.718050000 | 2.573412000  | -1.398799000 |
| H | -2.458477000 | -4.499609000 | -0.888710000 | H                              | -3.656454000 | 2.813042000  | -1.495517000 |
| H | -1.116139000 | -0.660795000 | -2.281661000 | H                              | -5.115307000 | 2.334210000  | -2.389361000 |
| H | -3.778429000 | -3.006019000 | -2.741020000 | C                              | -5.415477000 | 3.793666000  | -0.856590000 |
| H | -2.372278000 | -3.617012000 | -3.616842000 | O                              | -6.733627000 | 3.810275000  | -1.160586000 |
| H | -2.727750000 | -1.881143000 | -3.622448000 | H                              | -7.133951000 | 4.593071000  | -0.747544000 |
| H | -0.060591000 | -4.943755000 | 1.536737000  | O                              | -4.895691000 | 4.662621000  | -0.186828000 |
| H | -1.765500000 | -5.294826000 | 1.219184000  | <sup>3</sup> TS <sub>dis</sub> |              |              |              |
| H | -1.324901000 | -4.082011000 | 2.424422000  | Mn                             | 0.918295000  | 0.297671000  | -0.267942000 |
| H | -0.032390000 | -1.312960000 | 2.370741000  | N                              | 2.298284000  | 1.970790000  | -0.037278000 |
| H | 0.858666000  | -2.820122000 | 2.185055000  | N                              | 2.736539000  | -0.356546000 | -1.375447000 |
| H | 2.047025000  | -2.604538000 | -0.234531000 | N                              | -0.271957000 | -1.398406000 | -0.381125000 |
| H | 2.736382000  | -3.683133000 | 1.752069000  | N                              | 1.808415000  | -0.922910000 | 1.260617000  |
| H | 4.147834000  | -3.521225000 | 0.750028000  | C                              | 3.262495000  | 2.019392000  | -0.968853000 |
| H | 4.619776000  | -2.956575000 | 3.157601000  | C                              | 4.167180000  | 3.090346000  | -1.035468000 |
| H | 4.916862000  | -1.559961000 | 2.131446000  | C                              | 4.021182000  | 4.107984000  | -0.092767000 |
| H | 3.576144000  | -0.820804000 | 4.080314000  | C                              | 3.018965000  | 4.062500000  | 0.883215000  |
| H | 2.387612000  | -2.082227000 | 3.791728000  | C                              | 2.173909000  | 2.958581000  | 0.862882000  |
| H | 1.591194000  | 0.117510000  | 2.889198000  | C                              | 2.858922000  | 5.148273000  | 1.911638000  |
| H | 3.082019000  | 0.274408000  | 1.967539000  | C                              | 5.246890000  | 3.143502000  | -2.084263000 |
| O | 0.106728000  | 1.187745000  | -1.625395000 | C                              | 3.301495000  | 0.879232000  | -1.958061000 |
| O | -0.429582000 | 2.482283000  | -1.304223000 | C                              | 3.671861000  | -0.956045000 | -0.360161000 |
| H | 0.281927000  | 3.095820000  | -1.550176000 | C                              | 4.858532000  | -1.669477000 | -1.030060000 |
| O | -0.338970000 | 1.029507000  | 1.542094000  | C                              | 4.421785000  | -2.686077000 | -2.088419000 |
| C | -1.301262000 | 1.752942000  | 1.829303000  | C                              | 3.528983000  | -1.999581000 | -3.127006000 |
| O | -1.820816000 | 2.608700000  | 0.977434000  | C                              | 2.339838000  | -1.330648000 | -2.437410000 |
| H | -1.314853000 | 2.596771000  | 0.119928000  | C                              | -0.157736000 | -2.248236000 | 0.659610000  |

|   |              |              |              |                                |              |              |              |
|---|--------------|--------------|--------------|--------------------------------|--------------|--------------|--------------|
| C | -0.803140000 | -3.487882000 | 0.660813000  | H                              | 1.620932000  | 0.466847000  | 2.816647000  |
| C | -1.573142000 | -3.807174000 | -0.460926000 | H                              | 3.113540000  | 0.599349000  | 1.899673000  |
| C | -1.710557000 | -2.921943000 | -1.532264000 | O                              | 0.268928000  | 1.047674000  | -1.663199000 |
| C | -1.032825000 | -1.709732000 | -1.444057000 | O                              | -1.935797000 | 1.203217000  | -1.542154000 |
| C | -2.528642000 | -3.257565000 | -2.748547000 | H                              | -1.948993000 | 1.782677000  | -2.321319000 |
| C | -0.692564000 | -4.433710000 | 1.826827000  | O                              | -0.260596000 | 1.128267000  | 1.326421000  |
| C | 0.676402000  | -1.735437000 | 1.796409000  | C                              | -1.216135000 | 1.881513000  | 1.591576000  |
| C | 2.828512000  | -1.825374000 | 0.586492000  | O                              | -2.083910000 | 2.283991000  | 0.712908000  |
| C | 3.628366000  | -2.647205000 | 1.609279000  | H                              | -1.955601000 | 1.877492000  | -0.241655000 |
| C | 4.267422000  | -1.784685000 | 2.700057000  | C                              | -1.417797000 | 2.405692000  | 2.981511000  |
| C | 3.188738000  | -0.944780000 | 3.389595000  | H                              | -0.984120000 | 3.410665000  | 3.035221000  |
| C | 2.427460000  | -0.108326000 | 2.362339000  | H                              | -2.481092000 | 2.487110000  | 3.211054000  |
| H | 4.705759000  | 4.951281000  | -0.116214000 | H                              | -0.910027000 | 1.765876000  | 3.702284000  |
| H | 1.384272000  | 2.843470000  | 1.592971000  | C                              | -3.533766000 | -2.102755000 | 1.936806000  |
| H | 2.677141000  | 6.114247000  | 1.430205000  | C                              | -3.650698000 | -1.023149000 | 1.071959000  |
| H | 3.767389000  | 5.248927000  | 2.513797000  | C                              | -4.375265000 | -1.136443000 | -0.133495000 |
| H | 2.024063000  | 4.938110000  | 2.583781000  | C                              | -4.956051000 | -2.378598000 | -0.452403000 |
| H | 5.934744000  | 2.296191000  | -1.991233000 | C                              | -4.844458000 | -3.460646000 | 0.415185000  |
| H | 5.829164000  | 4.061293000  | -1.986582000 | C                              | -4.134940000 | -3.326926000 | 1.614258000  |
| H | 4.826131000  | 3.114500000  | -3.094319000 | H                              | -2.973316000 | -1.998432000 | 2.860260000  |
| H | 2.699437000  | 1.142432000  | -2.833474000 | H                              | -3.184141000 | -0.078426000 | 1.324582000  |
| H | 4.323520000  | 0.721537000  | -2.308155000 | H                              | -5.508824000 | -2.480502000 | -1.381137000 |
| H | 4.072410000  | -0.116219000 | 0.209830000  | H                              | -5.308377000 | -4.408294000 | 0.161719000  |
| H | 5.488669000  | -0.908905000 | -1.503083000 | H                              | -4.041394000 | -4.172185000 | 2.288133000  |
| H | 5.482986000  | -2.128912000 | -0.261137000 | C                              | -4.539803000 | 0.041051000  | -1.035191000 |
| H | 5.303535000  | -3.121698000 | -2.567042000 | H                              | -3.516032000 | 0.370512000  | -1.371387000 |
| H | 3.874422000  | -3.515234000 | -1.622073000 | H                              | -5.084025000 | -0.240627000 | -1.942211000 |
| H | 3.140246000  | -2.720742000 | -3.852336000 | C                              | -5.204416000 | 1.255385000  | -0.367444000 |
| H | 4.107818000  | -1.260156000 | -3.692277000 | H                              | -4.654274000 | 1.533425000  | 0.536463000  |
| H | 1.704641000  | -0.790957000 | -3.142018000 | H                              | -6.217824000 | 0.978983000  | -0.056244000 |
| H | 1.721360000  | -2.099962000 | -1.971564000 | C                              | -5.262898000 | 2.464881000  | -1.318346000 |
| H | -2.085828000 | -4.763262000 | -0.490584000 | H                              | -4.254652000 | 2.745175000  | -1.631166000 |
| H | -1.098463000 | -0.960575000 | -2.220279000 | H                              | -5.850919000 | 2.215876000  | -2.205946000 |
| H | -3.389657000 | -3.872447000 | -2.479057000 | C                              | -5.871109000 | 3.657203000  | -0.624295000 |
| H | -1.927510000 | -3.819869000 | -3.471477000 | O                              | -7.222409000 | 3.642115000  | -0.667139000 |
| H | -2.888902000 | -2.352923000 | -3.243770000 | H                              | -7.554829000 | 4.406343000  | -0.167808000 |
| H | 0.346643000  | -4.729978000 | 2.003009000  | O                              | -5.249850000 | 4.527068000  | -0.049853000 |
| H | -1.274057000 | -5.337978000 | 1.639678000  | <sup>5</sup> TS <sub>dis</sub> |              |              |              |
| H | -1.067288000 | -3.976139000 | 2.747373000  | Mn                             | 0.823814000  | 0.256342000  | -0.230577000 |
| H | 0.069067000  | -1.079017000 | 2.425651000  | N                              | 2.099896000  | 1.978421000  | -0.087329000 |
| H | 1.038263000  | -2.549624000 | 2.422837000  | N                              | 2.678435000  | -0.355287000 | -1.359275000 |
| H | 2.246765000  | -2.525131000 | -0.015369000 | N                              | -0.213642000 | -1.535242000 | -0.307611000 |
| H | 2.957009000  | -3.376487000 | 2.073437000  | N                              | 1.792385000  | -0.845857000 | 1.333262000  |
| H | 4.373673000  | -3.240237000 | 1.075602000  | C                              | 3.039084000  | 2.061909000  | -1.044145000 |
| H | 4.778772000  | -2.424848000 | 3.424424000  | C                              | 3.864872000  | 3.190658000  | -1.164937000 |
| H | 5.030129000  | -1.124196000 | 2.268621000  | C                              | 3.672383000  | 4.226456000  | -0.251241000 |
| H | 3.629617000  | -0.255515000 | 4.116050000  | C                              | 2.702420000  | 4.142103000  | 0.753890000  |
| H | 2.502786000  | -1.592593000 | 3.946828000  | C                              | 1.935851000  | 2.983404000  | 0.788013000  |



|   |              |              |              |                                 |              |              |              |
|---|--------------|--------------|--------------|---------------------------------|--------------|--------------|--------------|
| C | 2.495009000  | 5.243474000  | 1.756906000  | H                               | 0.055770000  | -1.044483000 | 2.497771000  |
| C | 4.914808000  | 3.283854000  | -2.241064000 | H                               | 1.105356000  | -2.456979000 | 2.570321000  |
| C | 3.143980000  | 0.893515000  | -1.994360000 | H                               | 2.306275000  | -2.462177000 | 0.103641000  |
| C | 3.644325000  | -0.833343000 | -0.309949000 | H                               | 3.069943000  | -3.207347000 | 2.210755000  |
| C | 4.888981000  | -1.488316000 | -0.930913000 | H                               | 4.472239000  | -3.033342000 | 1.197225000  |
| C | 4.542427000  | -2.585351000 | -1.941798000 | H                               | 4.855494000  | -2.123126000 | 3.514121000  |
| C | 3.615062000  | -2.017698000 | -3.021611000 | H                               | 5.025952000  | -0.846997000 | 2.316330000  |
| C | 2.372649000  | -1.404303000 | -2.376353000 | H                               | 3.597287000  | 0.001764000  | 4.151905000  |
| C | -0.089947000 | -2.313112000 | 0.786436000  | H                               | 2.542217000  | -1.397837000 | 4.033496000  |
| C | -0.665563000 | -3.585033000 | 0.844665000  | H                               | 1.542785000  | 0.575763000  | 2.850755000  |
| C | -1.351631000 | -4.024694000 | -0.290448000 | H                               | 3.020439000  | 0.759260000  | 1.916238000  |
| C | -1.469808000 | -3.228155000 | -1.432164000 | O                               | 0.041478000  | 0.982422000  | -1.638041000 |
| C | -0.883967000 | -1.967233000 | -1.385661000 | O                               | -1.891833000 | 0.811658000  | -1.502635000 |
| C | -2.178782000 | -3.705004000 | -2.669160000 | H                               | -1.956722000 | 1.179670000  | -2.400387000 |
| C | -0.566963000 | -4.441111000 | 2.079248000  | O                               | -0.463933000 | 1.078057000  | 1.408103000  |
| C | 0.701532000  | -1.696091000 | 1.903061000  | C                               | -1.299067000 | 1.983971000  | 1.530417000  |
| C | 2.854538000  | -1.713724000 | 0.677101000  | O                               | -1.997564000 | 2.448874000  | 0.522107000  |
| C | 3.701756000  | -2.461234000 | 1.717988000  | H                               | -1.854347000 | 1.900187000  | -0.312327000 |
| C | 4.304068000  | -1.533942000 | 2.775910000  | C                               | -1.585426000 | 2.645340000  | 2.842871000  |
| C | 3.187893000  | -0.731563000 | 3.450516000  | H                               | -1.376283000 | 3.716018000  | 2.759446000  |
| C | 2.375185000  | 0.030565000  | 2.404926000  | H                               | -2.647134000 | 2.537459000  | 3.081296000  |
| H | 4.295955000  | 5.113492000  | -0.318956000 | H                               | -0.975420000 | 2.204275000  | 3.628995000  |
| H | 1.182465000  | 2.838979000  | 1.549619000  | C                               | -3.690220000 | -2.330812000 | 1.809221000  |
| H | 2.241847000  | 6.182239000  | 1.254491000  | C                               | -3.726801000 | -1.164939000 | 1.054720000  |
| H | 3.407647000  | 5.417846000  | 2.335469000  | C                               | -4.275962000 | -1.167166000 | -0.244822000 |
| H | 1.689572000  | 4.999737000  | 2.453207000  | C                               | -4.755417000 | -2.381842000 | -0.772015000 |
| H | 5.668107000  | 2.496203000  | -2.131304000 | C                               | -4.735354000 | -3.544723000 | -0.007777000 |
| H | 5.425910000  | 4.246887000  | -2.192967000 | C                               | -4.202293000 | -3.523384000 | 1.284159000  |
| H | 4.476749000  | 3.181545000  | -3.238828000 | H                               | -3.262988000 | -2.315106000 | 2.806481000  |
| H | 2.507030000  | 1.082665000  | -2.865089000 | H                               | -3.329264000 | -0.246771000 | 1.472922000  |
| H | 4.168139000  | 0.802888000  | -2.363229000 | H                               | -5.164544000 | -2.398137000 | -1.777337000 |
| H | 3.977176000  | 0.059400000  | 0.221798000  | H                               | -5.128618000 | -4.468698000 | -0.419092000 |
| H | 5.465550000  | -0.706083000 | -1.436508000 | H                               | -4.173228000 | -4.432566000 | 1.875809000  |
| H | 5.537787000  | -1.861543000 | -0.135700000 | C                               | -4.369396000 | 0.073821000  | -1.044022000 |
| H | 5.459707000  | -2.979137000 | -2.389092000 | H                               | -3.226402000 | 0.367396000  | -1.292780000 |
| H | 4.050169000  | -3.427892000 | -1.438954000 | H                               | -4.804711000 | -0.104392000 | -2.031549000 |
| H | 3.291766000  | -2.800167000 | -3.715101000 | C                               | -4.986863000 | 1.290644000  | -0.361959000 |
| H | 4.147809000  | -1.266225000 | -3.616048000 | H                               | -4.476839000 | 1.504096000  | 0.581519000  |
| H | 1.708416000  | -0.948719000 | -3.113382000 | H                               | -6.024173000 | 1.039313000  | -0.110536000 |
| H | 1.804530000  | -2.194107000 | -1.881448000 | C                               | -4.965932000 | 2.540036000  | -1.258825000 |
| H | -1.806212000 | -5.010437000 | -0.280009000 | H                               | -3.942844000 | 2.818222000  | -1.516830000 |
| H | -0.940625000 | -1.276463000 | -2.215075000 | H                               | -5.514325000 | 2.337640000  | -2.184599000 |
| H | -3.047951000 | -4.312781000 | -2.408575000 | C                               | -5.596138000 | 3.727038000  | -0.571936000 |
| H | -1.511082000 | -4.321587000 | -3.280988000 | O                               | -6.931108000 | 3.576398000  | -0.422041000 |
| H | -2.514251000 | -2.864407000 | -3.280739000 | H                               | -7.278628000 | 4.354135000  | 0.044741000  |
| H | 0.474990000  | -4.668895000 | 2.327616000  | O                               | -5.004303000 | 4.707391000  | -0.172870000 |
| H | -1.092246000 | -5.386179000 | 1.931265000  | <sup>3</sup> IM1 <sub>dis</sub> |              |              |              |
| H | -1.010740000 | -3.939782000 | 2.945016000  | Mn                              | 0.806887000  | 0.143655000  | -0.131987000 |

|   |              |              |              |   |              |              |              |
|---|--------------|--------------|--------------|---|--------------|--------------|--------------|
| N | 0.579380000  | 2.102970000  | 0.470287000  | H | 2.582786000  | -0.703910000 | -2.461201000 |
| N | 2.138589000  | 1.087362000  | -1.455514000 | H | 1.790161000  | -5.577517000 | -1.219382000 |
| N | 1.204746000  | -1.835710000 | -0.631659000 | H | 0.010794000  | -1.814016000 | -2.302735000 |
| N | 2.666362000  | -0.288279000 | 0.993683000  | H | -0.594016000 | -5.205660000 | -2.767002000 |
| C | 0.961908000  | 3.000843000  | -0.459341000 | H | 0.861092000  | -4.982293000 | -3.739774000 |
| C | 0.822484000  | 4.379296000  | -0.251250000 | H | -0.395383000 | -3.730900000 | -3.726464000 |
| C | 0.269284000  | 4.788668000  | 0.962608000  | H | 4.155910000  | -4.277599000 | 0.955339000  |
| C | -0.125885000 | 3.863944000  | 1.935827000  | H | 3.155684000  | -5.715063000 | 0.707369000  |
| C | 0.052696000  | 2.518634000  | 1.634381000  | H | 2.771709000  | -4.578967000 | 2.008436000  |
| C | -0.715903000 | 4.294255000  | 3.250592000  | H | 1.944406000  | -1.829702000 | 2.218940000  |
| C | 1.250675000  | 5.375846000  | -1.295955000 | H | 3.571424000  | -2.122468000 | 1.619165000  |
| C | 1.509399000  | 2.414178000  | -1.730524000 | H | 3.716895000  | -0.856510000 | -0.723047000 |
| C | 3.459535000  | 1.275421000  | -0.725633000 | H | 5.354693000  | -1.153769000 | 0.947194000  |
| C | 4.557342000  | 1.807679000  | -1.659700000 | H | 5.928616000  | 0.121953000  | -0.088041000 |
| C | 4.717590000  | 0.977318000  | -2.935074000 | H | 6.275461000  | 0.647308000  | 2.349940000  |
| C | 3.372882000  | 0.890404000  | -3.662409000 | H | 5.209195000  | 1.836652000  | 1.614702000  |
| C | 2.307258000  | 0.314972000  | -2.731740000 | H | 4.200212000  | 1.099242000  | 3.756896000  |
| C | 2.003017000  | -2.522288000 | 0.204136000  | H | 4.332946000  | -0.588368000 | 3.280595000  |
| C | 2.243793000  | -3.892658000 | 0.028159000  | H | 2.004696000  | 0.264286000  | 2.901053000  |
| C | 1.626263000  | -4.516042000 | -1.056400000 | H | 2.647888000  | 1.588740000  | 1.943801000  |
| C | 0.808571000  | -3.801457000 | -1.940122000 | O | -0.536834000 | 0.258567000  | -1.332636000 |
| C | 0.629589000  | -2.447381000 | -1.679281000 | O | -3.065964000 | 0.634301000  | -0.131318000 |
| C | 0.132571000  | -4.462092000 | -3.110694000 | H | -1.410423000 | 0.460048000  | -0.948750000 |
| C | 3.128720000  | -4.657741000 | 0.976682000  | O | -0.229548000 | -0.699492000 | 1.579843000  |
| C | 2.590224000  | -1.732989000 | 1.343000000  | C | -1.145775000 | -0.716812000 | 2.408638000  |
| C | 3.780960000  | -0.041549000 | -0.000664000 | O | -2.269163000 | -0.049997000 | 2.284517000  |
| C | 5.167144000  | -0.114339000 | 0.658162000  | H | -2.447287000 | 0.305800000  | 1.366294000  |
| C | 5.289373000  | 0.778738000  | 1.895483000  | C | -1.061574000 | -1.531490000 | 3.662360000  |
| C | 4.182950000  | 0.426294000  | 2.894301000  | H | -1.451529000 | -0.965258000 | 4.510193000  |
| C | 2.813946000  | 0.549005000  | 2.227166000  | H | -1.695878000 | -2.413494000 | 3.526569000  |
| H | 0.148617000  | 5.850776000  | 1.155870000  | H | -0.036916000 | -1.848806000 | 3.847304000  |
| H | -0.221066000 | 1.749468000  | 2.342948000  | C | -4.030473000 | -3.307843000 | 1.779165000  |
| H | -1.623846000 | 4.884588000  | 3.092854000  | C | -4.424991000 | -2.142902000 | 1.119192000  |
| H | -0.010205000 | 4.920781000  | 3.805009000  | C | -3.689371000 | -1.664350000 | 0.028905000  |
| H | -0.970613000 | 3.432892000  | 3.871664000  | C | -2.558545000 | -2.375328000 | -0.392567000 |
| H | 2.326527000  | 5.308227000  | -1.489999000 | C | -2.153270000 | -3.530623000 | 0.274262000  |
| H | 1.031143000  | 6.393133000  | -0.967497000 | C | -2.890813000 | -4.000004000 | 1.363661000  |
| H | 0.734092000  | 5.206067000  | -2.245715000 | H | -4.610127000 | -3.669811000 | 2.622326000  |
| H | 0.686762000  | 2.242717000  | -2.429535000 | H | -5.301861000 | -1.609699000 | 1.468344000  |
| H | 2.218544000  | 3.092600000  | -2.204580000 | H | -1.984789000 | -2.005936000 | -1.234611000 |
| H | 3.270190000  | 2.041865000  | 0.027109000  | H | -1.266277000 | -4.061274000 | -0.054943000 |
| H | 4.309589000  | 2.838803000  | -1.931682000 | H | -2.581406000 | -4.901427000 | 1.883312000  |
| H | 5.492071000  | 1.872276000  | -1.099098000 | C | -4.019195000 | -0.360376000 | -0.666302000 |
| H | 5.475970000  | 1.432488000  | -3.578358000 | H | -3.354946000 | 1.533881000  | -0.336947000 |
| H | 5.072364000  | -0.032665000 | -2.693638000 | H | -3.789462000 | -0.456808000 | -1.733354000 |
| H | 3.439027000  | 0.237480000  | -4.537941000 | C | -5.457440000 | 0.119929000  | -0.498455000 |
| H | 3.075895000  | 1.879819000  | -4.028450000 | H | -5.637065000 | 0.383775000  | 0.548707000  |
| H | 1.322922000  | 0.274084000  | -3.199086000 | H | -6.119038000 | -0.714183000 | -0.745857000 |

|                                 |              |              |              |   |              |              |              |
|---------------------------------|--------------|--------------|--------------|---|--------------|--------------|--------------|
| C                               | -5.796604000 | 1.315675000  | -1.407636000 | H | 2.234784000  | 2.708272000  | -2.676047000 |
| H                               | -5.174805000 | 2.188907000  | -1.196175000 | H | 3.031634000  | 2.378500000  | -0.166593000 |
| H                               | -5.642881000 | 1.034312000  | -2.455184000 | H | 4.346800000  | 2.749601000  | -2.089488000 |
| C                               | -7.231154000 | 1.762272000  | -1.243534000 | H | 5.438846000  | 2.216270000  | -0.841740000 |
| O                               | -8.104960000 | 0.794685000  | -1.595981000 | H | 5.920745000  | 1.116005000  | -3.051304000 |
| H                               | -9.006979000 | 1.129497000  | -1.462760000 | H | 5.473530000  | -0.093961000 | -1.857131000 |
| O                               | -7.587315000 | 2.849088000  | -0.842478000 | H | 4.205381000  | -0.542808000 | -3.941398000 |
| <sup>5</sup> IM1 <sub>dis</sub> |              |              |              | H | 3.620185000  | 1.116638000  | -3.983527000 |
| Mn                              | 0.798651000  | 0.084881000  | -0.041738000 | H | 1.867548000  | -0.401747000 | -3.024092000 |
| N                               | 0.249556000  | 2.122662000  | -0.114923000 | H | 3.027242000  | -0.996678000 | -1.850685000 |
| N                               | 2.294853000  | 0.937936000  | -1.480408000 | H | 2.792577000  | -5.418498000 | 0.517998000  |
| N                               | 1.399236000  | -1.884416000 | 0.117236000  | H | 0.388058000  | -2.511570000 | -1.558350000 |
| N                               | 2.442893000  | 0.286119000  | 1.309580000  | H | 0.717905000  | -6.029035000 | -1.249581000 |
| C                               | 0.671101000  | 2.778867000  | -1.208755000 | H | 2.128779000  | -5.543468000 | -2.189092000 |
| C                               | 0.259841000  | 4.095569000  | -1.472125000 | H | 0.564419000  | -4.765797000 | -2.483583000 |
| C                               | -0.610398000 | 4.691413000  | -0.560211000 | H | 4.546790000  | -3.155314000 | 2.490923000  |
| C                               | -1.049837000 | 4.012736000  | 0.582747000  | H | 3.924033000  | -4.810132000 | 2.501911000  |
| C                               | -0.580314000 | 2.717270000  | 0.759405000  | H | 3.132152000  | -3.557251000 | 3.468174000  |
| C                               | -1.982894000 | 4.646063000  | 1.577779000  | H | 1.700834000  | -0.956275000 | 2.830885000  |
| C                               | 0.728888000  | 4.832063000  | -2.699320000 | H | 3.435490000  | -1.119031000 | 2.587041000  |
| C                               | 1.559805000  | 2.018290000  | -2.163758000 | H | 3.849279000  | -0.536755000 | -0.005905000 |
| C                               | 3.415944000  | 1.472547000  | -0.639281000 | H | 5.164138000  | -0.159640000 | 1.928781000  |
| C                               | 4.630342000  | 1.876051000  | -1.492204000 | H | 5.796293000  | 0.868710000  | 0.677850000  |
| C                               | 5.091850000  | 0.758970000  | -2.433137000 | H | 5.622407000  | 2.055919000  | 2.893770000  |
| C                               | 3.920107000  | 0.304671000  | -3.310378000 | H | 4.619889000  | 2.849057000  | 1.686703000  |
| C                               | 2.741283000  | -0.118553000 | -2.434542000 | H | 3.278632000  | 2.580823000  | 3.749950000  |
| C                               | 2.215806000  | -2.157772000 | 1.151667000  | H | 3.656705000  | 0.866479000  | 3.822793000  |
| C                               | 2.736737000  | -3.442112000 | 1.347506000  | H | 1.378900000  | 1.232829000  | 2.847395000  |
| C                               | 2.391928000  | -4.414800000 | 0.406410000  | H | 2.063445000  | 2.327389000  | 1.655287000  |
| C                               | 1.555310000  | -4.129061000 | -0.678696000 | O | -0.363259000 | -0.318171000 | -1.371313000 |
| C                               | 1.061711000  | -2.831363000 | -0.772385000 | O | -2.977388000 | 0.458603000  | -0.512238000 |
| C                               | 1.218041000  | -5.171106000 | -1.709596000 | H | -1.284267000 | -0.066498000 | -1.179582000 |
| C                               | 3.633028000  | -3.758369000 | 2.515915000  | O | -0.462574000 | -0.217359000 | 1.811475000  |
| C                               | 2.483830000  | -0.999930000 | 2.070236000  | C | -1.479715000 | -0.388154000 | 2.486462000  |
| C                               | 3.699831000  | 0.436238000  | 0.465480000  | O | -2.681514000 | -0.047767000 | 2.068082000  |
| C                               | 4.933988000  | 0.729192000  | 1.332756000  | H | -2.694851000 | 0.232731000  | 1.105849000  |
| C                               | 4.735587000  | 1.925207000  | 2.267200000  | C | -1.456019000 | -1.016495000 | 3.845493000  |
| C                               | 3.492510000  | 1.702426000  | 3.133585000  | H | -0.469136000 | -0.909281000 | 4.294127000  |
| C                               | 2.270299000  | 1.441511000  | 2.254825000  | H | -2.224492000 | -0.583970000 | 4.487251000  |
| H                               | -0.951082000 | 5.706895000  | -0.741620000 | H | -1.675047000 | -2.083514000 | 3.726003000  |
| H                               | -0.862785000 | 2.133408000  | 1.624794000  | C | -2.563285000 | -3.825492000 | -0.013456000 |
| H                               | -2.908082000 | 4.968022000  | 1.089974000  | C | -3.164258000 | -2.568661000 | 0.040161000  |
| H                               | -1.525354000 | 5.532173000  | 2.029103000  | C | -3.366331000 | -1.828184000 | -1.133257000 |
| H                               | -2.241523000 | 3.949089000  | 2.377834000  | C | -2.964019000 | -2.371219000 | -2.358347000 |
| H                               | 1.816774000  | 4.958819000  | -2.694554000 | C | -2.375515000 | -3.635473000 | -2.415129000 |
| H                               | 0.274351000  | 5.823091000  | -2.747161000 | C | -2.174330000 | -4.364324000 | -1.241853000 |
| H                               | 0.466259000  | 4.293188000  | -3.615077000 | H | -2.408910000 | -4.387974000 | 0.901836000  |
| H                               | 0.926335000  | 1.557130000  | -2.927644000 | H | -3.476125000 | -2.171991000 | 0.999481000  |

|                                |              |              |              |   |              |              |              |
|--------------------------------|--------------|--------------|--------------|---|--------------|--------------|--------------|
| H                              | -3.113553000 | -1.801815000 | -3.271049000 | H | -2.347969000 | -5.391372000 | -0.217400000 |
| H                              | -2.076361000 | -4.049878000 | -3.372730000 | H | 0.214405000  | -2.718934000 | -2.396197000 |
| H                              | -1.722040000 | -5.349241000 | -1.283762000 | H | -2.197712000 | -5.244372000 | -2.984675000 |
| C                              | -3.982834000 | -0.449084000 | -1.098058000 | H | -0.750314000 | -6.092685000 | -2.439215000 |
| H                              | -3.179992000 | 1.373360000  | -0.751564000 | H | -0.599041000 | -4.696761000 | -3.520128000 |
| H                              | -4.148439000 | -0.106177000 | -2.123503000 | H | -1.696487000 | -4.056540000 | 2.946694000  |
| C                              | -5.296137000 | -0.381371000 | -0.318615000 | H | -2.939127000 | -4.902943000 | 2.014199000  |
| H                              | -5.135906000 | -0.715756000 | 0.710907000  | H | -3.111513000 | -3.178648000 | 2.363930000  |
| H                              | -5.987956000 | -1.088680000 | -0.785486000 | H | -1.613102000 | -0.802555000 | 1.779890000  |
| C                              | -5.915665000 | 1.028508000  | -0.315066000 | H | -0.763366000 | -1.963636000 | 2.773639000  |
| H                              | -5.267449000 | 1.740139000  | 0.200164000  | H | 1.553702000  | -2.441613000 | 1.660678000  |
| H                              | -6.071685000 | 1.369199000  | -1.343901000 | H | 0.923429000  | -2.211193000 | 3.932186000  |
| C                              | -7.241621000 | 1.037676000  | 0.407185000  | H | 2.657241000  | -2.106329000 | 3.878519000  |
| O                              | -8.213140000 | 0.433552000  | -0.311474000 | H | 1.644384000  | -0.379580000 | 5.405218000  |
| H                              | -9.032888000 | 0.440237000  | 0.209637000  | H | 2.524553000  | 0.399034000  | 4.097032000  |
| O                              | -7.438730000 | 1.502165000  | 1.509581000  | H | 0.322295000  | 1.509637000  | 4.313654000  |
| <sup>3</sup> TS <sub>pro</sub> |              |              |              | H | -0.511945000 | -0.035343000 | 4.223337000  |
| Mn                             | 0.678033000  | -0.385023000 | -0.468926000 | H | -0.547942000 | 1.142771000  | 2.009144000  |
| N                              | -0.244747000 | -2.198392000 | -0.453731000 | H | 1.196286000  | 1.278925000  | 2.047867000  |
| N                              | 0.475834000  | -0.646838000 | 1.619637000  | H | 3.509228000  | 4.780607000  | -0.794392000 |
| N                              | 1.594097000  | 1.469068000  | -0.484313000 | H | -0.137773000 | 2.580511000  | -0.278946000 |
| N                              | 2.780844000  | -0.936463000 | -0.069956000 | H | -0.228682000 | 5.016174000  | -0.766083000 |
| C                              | -0.884387000 | -2.490960000 | 0.695626000  | H | 1.267994000  | 5.931207000  | -1.052188000 |
| C                              | -1.665447000 | -3.647106000 | 0.826414000  | H | 0.772335000  | 5.515285000  | 0.592642000  |
| C                              | -1.748344000 | -4.488061000 | -0.284818000 | H | 5.668362000  | 2.144419000  | -0.110407000 |
| C                              | -1.076721000 | -4.197215000 | -1.477982000 | H | 5.551346000  | 3.635289000  | -1.055009000 |
| C                              | -0.330447000 | -3.024093000 | -1.511014000 | H | 5.442401000  | 2.063037000  | -1.859068000 |
| C                              | -1.157511000 | -5.104339000 | -2.674887000 | H | 3.647563000  | -0.186151000 | -1.821634000 |
| C                              | -2.392623000 | -3.963055000 | 2.106567000  | H | 4.603870000  | 0.131182000  | -0.387518000 |
| C                              | -0.752026000 | -1.474810000 | 1.798569000  | H | 2.934759000  | 0.254659000  | 1.634918000  |
| C                              | 1.691784000  | -1.440624000 | 2.073362000  | H | 5.079631000  | -0.718089000 | 1.531854000  |
| C                              | 1.747217000  | -1.569298000 | 3.604149000  | H | 4.339436000  | -1.314829000 | 2.989965000  |
| C                              | 1.648182000  | -0.221274000 | 4.323158000  | H | 5.541606000  | -3.129145000 | 1.729425000  |
| C                              | 0.376209000  | 0.506841000  | 3.878910000  | H | 3.826567000  | -3.500724000 | 1.836676000  |
| C                              | 0.360684000  | 0.652862000  | 2.359379000  | H | 4.564017000  | -3.857006000 | -0.506521000 |
| C                              | 2.932791000  | 1.455119000  | -0.653174000 | H | 5.254147000  | -2.239648000 | -0.571111000 |
| C                              | 3.670334000  | 2.641309000  | -0.764054000 | H | 2.997197000  | -2.273146000 | -1.662731000 |
| C                              | 2.965738000  | 3.844652000  | -0.702274000 | H | 2.304553000  | -2.977603000 | -0.211761000 |
| C                              | 1.579340000  | 3.868185000  | -0.527451000 | O | -1.267233000 | 0.470353000  | -0.521490000 |
| C                              | 0.935002000  | 2.638965000  | -0.419872000 | O | -1.737126000 | 0.792702000  | -1.852872000 |
| C                              | 0.804004000  | 5.153393000  | -0.440806000 | H | -2.187440000 | -0.023929000 | -2.130210000 |
| C                              | 5.163828000  | 2.619628000  | -0.958647000 | O | 1.089365000  | -0.475680000 | -2.472228000 |
| C                              | 3.580495000  | 0.096883000  | -0.767313000 | C | 1.075078000  | 0.236899000  | -3.487286000 |
| C                              | 2.938086000  | -0.815962000 | 1.422428000  | O | 0.201478000  | 1.201601000  | -3.662871000 |
| C                              | 4.287156000  | -1.377644000 | 1.901165000  | H | -0.476816000 | 1.190473000  | -2.938202000 |
| C                              | 4.551172000  | -2.800678000 | 1.401412000  | C | 2.070763000  | 0.070662000  | -4.587240000 |
| C                              | 4.449313000  | -2.837138000 | -0.126878000 | H | 1.587635000  | 0.169533000  | -5.560541000 |
| C                              | 3.087388000  | -2.308802000 | -0.575498000 | H | 2.813794000  | 0.871301000  | -4.498322000 |

|                                |              |              |              |   |              |              |              |
|--------------------------------|--------------|--------------|--------------|---|--------------|--------------|--------------|
| H                              | 2.570593000  | -0.892266000 | -4.495705000 | C | -0.579182000 | -2.529775000 | -1.195928000 |
| C                              | -3.161972000 | 4.966361000  | -0.362345000 | C | -1.168317000 | -4.601061000 | -2.513132000 |
| C                              | -3.388293000 | 3.593295000  | -0.325691000 | C | 0.853568000  | -4.782664000 | 2.125079000  |
| C                              | -2.987184000 | 2.822909000  | 0.788373000  | C | 1.066239000  | -1.768117000 | 1.996899000  |
| C                              | -2.326422000 | 3.488297000  | 1.846999000  | C | 3.061006000  | -1.214504000 | 0.652552000  |
| C                              | -2.100015000 | 4.859682000  | 1.806175000  | C | 4.169386000  | -1.698719000 | 1.602633000  |
| C                              | -2.521966000 | 5.608686000  | 0.702824000  | C | 4.593412000  | -0.625894000 | 2.608982000  |
| H                              | -3.487944000 | 5.540718000  | -1.224123000 | C | 3.366793000  | -0.152185000 | 3.394621000  |
| H                              | -3.885285000 | 3.112335000  | -1.161029000 | C | 2.274906000  | 0.329596000  | 2.438110000  |
| H                              | -2.017578000 | 2.916809000  | 2.717944000  | H | 2.991669000  | 5.721049000  | -0.658635000 |
| H                              | -1.601412000 | 5.348570000  | 2.637406000  | H | 0.367232000  | 3.053621000  | 1.420846000  |
| H                              | -2.348164000 | 6.679373000  | 0.670302000  | H | 0.882250000  | 6.516218000  | 0.968513000  |
| C                              | -3.180176000 | 1.371803000  | 0.850067000  | H | 2.163974000  | 5.963297000  | 2.046595000  |
| H                              | -2.094155000 | 0.889389000  | 0.160770000  | H | 0.527367000  | 5.305351000  | 2.212768000  |
| H                              | -3.045461000 | 0.978996000  | 1.863240000  | H | 4.723009000  | 3.307947000  | -2.423070000 |
| C                              | -4.355556000 | 0.724796000  | 0.134880000  | H | 4.171423000  | 4.982719000  | -2.544701000 |
| H                              | -4.335064000 | 0.961492000  | -0.934714000 | H | 3.394441000  | 3.720190000  | -3.509138000 |
| H                              | -5.303217000 | 1.123797000  | 0.519032000  | H | 1.771496000  | 1.284562000  | -2.924841000 |
| C                              | -4.335986000 | -0.805713000 | 0.321049000  | H | 3.488220000  | 1.407090000  | -2.586813000 |
| H                              | -3.372195000 | -1.224001000 | 0.024587000  | H | 3.609340000  | 0.794354000  | 0.110352000  |
| H                              | -4.498817000 | -1.044487000 | 1.378072000  | H | 5.146889000  | 0.409242000  | -1.658526000 |
| C                              | -5.385763000 | -1.517799000 | -0.493681000 | H | 5.620340000  | -0.622241000 | -0.338759000 |
| O                              | -6.639681000 | -1.158889000 | -0.141790000 | H | 5.706172000  | -1.822581000 | -2.548677000 |
| H                              | -7.267486000 | -1.639775000 | -0.705894000 | H | 4.539555000  | -2.591492000 | -1.481934000 |
| O                              | -5.162139000 | -2.321112000 | -1.375121000 | H | 3.485584000  | -2.312570000 | -3.703065000 |
| <sup>5</sup> TS <sub>pro</sub> |              |              |              | H | 3.904476000  | -0.604923000 | -3.731766000 |
| Mn                             | 0.461898000  | 0.239766000  | -0.121239000 | H | 1.512236000  | -0.901009000 | -3.058785000 |
| N                              | 1.348964000  | 2.277436000  | -0.221686000 | H | 1.999145000  | -2.015227000 | -1.796420000 |
| N                              | 2.390711000  | 0.008673000  | -1.391533000 | H | -0.234094000 | -5.720152000 | -0.184500000 |
| N                              | -0.049066000 | -1.894023000 | -0.142807000 | H | -0.941152000 | -1.903413000 | -2.004268000 |
| N                              | 1.876485000  | -0.672276000 | 1.406969000  | H | -1.787851000 | -5.462371000 | -2.251893000 |
| C                              | 2.234606000  | 2.473414000  | -1.212604000 | H | -0.337681000 | -4.964955000 | -3.128076000 |
| C                              | 2.855966000  | 3.717805000  | -1.412871000 | H | -1.764955000 | -3.918937000 | -3.122441000 |
| C                              | 2.527502000  | 4.746982000  | -0.530702000 | H | 1.927594000  | -4.637851000 | 2.283485000  |
| C                              | 1.624408000  | 4.547117000  | 0.518743000  | H | 0.679234000  | -5.849264000 | 1.971494000  |
| C                              | 1.061857000  | 3.279845000  | 0.622900000  | H | 0.342767000  | -4.485273000 | 3.046048000  |
| C                              | 1.277025000  | 5.640005000  | 1.492202000  | H | 0.285305000  | -1.303094000 | 2.605814000  |
| C                              | 3.837801000  | 3.943407000  | -2.533772000 | H | 1.659795000  | -2.402755000 | 2.657555000  |
| C                              | 2.509995000  | 1.293261000  | -2.114874000 | H | 2.694265000  | -2.089195000 | 0.113949000  |
| C                              | 3.504595000  | -0.167673000 | -0.394871000 | H | 3.794180000  | -2.570487000 | 2.150179000  |
| C                              | 4.841759000  | -0.476213000 | -1.090380000 | H | 5.017159000  | -2.063461000 | 1.019001000  |
| C                              | 4.747022000  | -1.671773000 | -2.044143000 | H | 5.354758000  | -1.026998000 | 3.284821000  |
| C                              | 3.630848000  | -1.433164000 | -3.067529000 | H | 5.050020000  | 0.226124000  | 2.088626000  |
| C                              | 2.313203000  | -1.130189000 | -2.351546000 | H | 3.622405000  | 0.672023000  | 4.068237000  |
| C                              | 0.431275000  | -2.592915000 | 0.901437000  | H | 2.989624000  | -0.968412000 | 4.022361000  |
| C                              | 0.359539000  | -3.992449000 | 0.940863000  | H | 1.368102000  | 0.613893000  | 2.973324000  |
| C                              | -0.181691000 | -4.634961000 | -0.175074000 | H | 2.626760000  | 1.219964000  | 1.911424000  |
| C                              | -0.646456000 | -3.917609000 | -1.280373000 | O | -1.427020000 | 0.638861000  | -1.177890000 |

|                                |              |              |              |   |              |              |              |
|--------------------------------|--------------|--------------|--------------|---|--------------|--------------|--------------|
| O                              | -1.635065000 | 2.059369000  | -1.111276000 | C | 3.442856000  | 0.512534000  | -0.872639000 |
| H                              | -1.308353000 | 2.385865000  | -1.964838000 | C | 4.583775000  | 0.748861000  | -1.873893000 |
| O                              | -0.760505000 | 0.809414000  | 1.727434000  | C | 4.472605000  | -0.137370000 | -3.117422000 |
| C                              | -1.630014000 | 1.533341000  | 2.207710000  | C | 3.106967000  | 0.071494000  | -3.779371000 |
| O                              | -2.230881000 | 2.488779000  | 1.509525000  | C | 1.984083000  | -0.176810000 | -2.771782000 |
| H                              | -1.926577000 | 2.488954000  | 0.571108000  | C | 1.092496000  | -2.682310000 | 0.132386000  |
| C                              | -2.106615000 | 1.428175000  | 3.621993000  | C | 1.019367000  | -4.042842000 | -0.203252000 |
| H                              | -1.938572000 | 2.380616000  | 4.132610000  | C | 0.221776000  | -4.398477000 | -1.292013000 |
| H                              | -3.183303000 | 1.236185000  | 3.631672000  | C | -0.485913000 | -3.435219000 | -2.017291000 |
| H                              | -1.576550000 | 0.627976000  | 4.134973000  | C | -0.370951000 | -2.117314000 | -1.589871000 |
| C                              | -3.228456000 | -2.952277000 | 1.393103000  | C | -1.337029000 | -3.796943000 | -3.203925000 |
| C                              | -3.344129000 | -1.704158000 | 0.798376000  | C | 1.777860000  | -5.086685000 | 0.574774000  |
| C                              | -3.724616000 | -1.583285000 | -0.558646000 | C | 1.954586000  | -2.170601000 | 1.264008000  |
| C                              | -3.977416000 | -2.763480000 | -1.294022000 | C | 3.484655000  | -0.849923000 | -0.143983000 |
| C                              | -3.902720000 | -4.008656000 | -0.682658000 | C | 4.867069000  | -1.292275000 | 0.364539000  |
| C                              | -3.514799000 | -4.109719000 | 0.657421000  | C | 5.342577000  | -0.484111000 | 1.575053000  |
| H                              | -2.914995000 | -3.030646000 | 2.428818000  | C | 4.294496000  | -0.571012000 | 2.689073000  |
| H                              | -3.120265000 | -0.813615000 | 1.373414000  | C | 2.937747000  | -0.097927000 | 2.167148000  |
| H                              | -4.262174000 | -2.683533000 | -2.338535000 | H | 1.766145000  | 5.930615000  | 0.814810000  |
| H                              | -4.130182000 | -4.904039000 | -1.251129000 | H | 0.371477000  | 2.199162000  | 2.381568000  |
| H                              | -3.428040000 | -5.084638000 | 1.125506000  | H | 0.036241000  | 5.636768000  | 2.993021000  |
| C                              | -3.862675000 | -0.279421000 | -1.199991000 | H | 1.663153000  | 5.229302000  | 3.539591000  |
| H                              | -2.573901000 | 0.166822000  | -1.243529000 | H | 0.327773000  | 4.099993000  | 3.825498000  |
| H                              | -4.123589000 | -0.343604000 | -2.259408000 | H | 3.405610000  | 4.630885000  | -1.938814000 |
| C                              | -4.610410000 | 0.821278000  | -0.459992000 | H | 2.521756000  | 6.069196000  | -1.413655000 |
| H                              | -4.072503000 | 1.134871000  | 0.439477000  | H | 1.782443000  | 4.941402000  | -2.559354000 |
| H                              | -5.563249000 | 0.405820000  | -0.108662000 | H | 0.907574000  | 2.101913000  | -2.495668000 |
| C                              | -4.892509000 | 2.042110000  | -1.354965000 | H | 2.609730000  | 2.528391000  | -2.442315000 |
| H                              | -3.968161000 | 2.439651000  | -1.771652000 | H | 3.491553000  | 1.302763000  | -0.121356000 |
| H                              | -5.549471000 | 1.743911000  | -2.178476000 | H | 4.570581000  | 1.800474000  | -2.178772000 |
| C                              | -5.558590000 | 3.153541000  | -0.582255000 | H | 5.538469000  | 0.607539000  | -1.362970000 |
| O                              | -6.806746000 | 2.820643000  | -0.183254000 | H | 5.279905000  | 0.099005000  | -3.816728000 |
| H                              | -7.175270000 | 3.560776000  | 0.326610000  | H | 4.591057000  | -1.193441000 | -2.843500000 |
| O                              | -5.056996000 | 4.225526000  | -0.316096000 | H | 2.966397000  | -0.617780000 | -4.617780000 |
| <sup>3</sup> IM <sub>pro</sub> |              |              |              | H | 3.040544000  | 1.084917000  | -4.191400000 |
| Mn                             | 0.690671000  | 0.198426000  | 0.014371000  | H | 1.002120000  | 0.014339000  | -3.209402000 |
| N                              | 1.006252000  | 2.185263000  | 0.413530000  | H | 2.000886000  | -1.223121000 | -2.469930000 |
| N                              | 2.079258000  | 0.656008000  | -1.530495000 | H | 0.155356000  | -5.443366000 | -1.581473000 |
| N                              | 0.398429000  | -1.750515000 | -0.551377000 | H | -0.890870000 | -1.320461000 | -2.110266000 |
| N                              | 2.466330000  | -0.819304000 | 0.955123000  | H | -2.045149000 | -4.591667000 | -2.949663000 |
| C                              | 1.544067000  | 2.877845000  | -0.611986000 | H | -0.716594000 | -4.165918000 | -4.027217000 |
| C                              | 1.830183000  | 4.246626000  | -0.512521000 | H | -1.901954000 | -2.934653000 | -3.565552000 |
| C                              | 1.554840000  | 4.870697000  | 0.704446000  | H | 2.859737000  | -4.930991000 | 0.501862000  |
| C                              | 1.026859000  | 4.157546000  | 1.786417000  | H | 1.555644000  | -6.084415000 | 0.191836000  |
| C                              | 0.769274000  | 2.807338000  | 1.582296000  | H | 1.514564000  | -5.064227000 | 1.636722000  |
| C                              | 0.746312000  | 4.812338000  | 3.111178000  | H | 1.347934000  | -2.095971000 | 2.171372000  |
| C                              | 2.415234000  | 5.013583000  | -1.669460000 | H | 2.762207000  | -2.876796000 | 1.473617000  |
| C                              | 1.800911000  | 2.083079000  | -1.861817000 | H | 3.143782000  | -1.613391000 | -0.845009000 |

|                                |              |              |              |   |              |              |              |
|--------------------------------|--------------|--------------|--------------|---|--------------|--------------|--------------|
| H                              | 4.794153000  | -2.347508000 | 0.651833000  | N | 1.969888000  | -0.799028000 | 1.172509000  |
| H                              | 5.589619000  | -1.258933000 | -0.453689000 | C | 2.078512000  | 2.796183000  | -0.879572000 |
| H                              | 6.308041000  | -0.865425000 | 1.920936000  | C | 2.657211000  | 4.074148000  | -0.811441000 |
| H                              | 5.498898000  | 0.566552000  | 1.297238000  | C | 2.225080000  | 4.919822000  | 0.211112000  |
| H                              | 4.574985000  | 0.049258000  | 3.546306000  | C | 1.256433000  | 4.512303000  | 1.133238000  |
| H                              | 4.221544000  | -1.603506000 | 3.051843000  | C | 0.743901000  | 3.229312000  | 0.971640000  |
| H                              | 2.156647000  | -0.198301000 | 2.923352000  | C | 0.790185000  | 5.405550000  | 2.250100000  |
| H                              | 3.002871000  | 0.964873000  | 1.916483000  | C | 3.703053000  | 4.529194000  | -1.797125000 |
| O                              | -1.791666000 | 0.659378000  | -0.851435000 | C | 2.456781000  | 1.803633000  | -1.953602000 |
| O                              | -2.351776000 | 1.789130000  | -0.134325000 | C | 3.566110000  | 0.174652000  | -0.458431000 |
| H                              | -2.045877000 | 2.540575000  | -0.666989000 | C | 4.938405000  | 0.121194000  | -1.150901000 |
| O                              | -0.371430000 | -0.153454000 | 1.736392000  | C | 4.979525000  | -0.905046000 | -2.288080000 |
| C                              | -1.141434000 | 0.206522000  | 2.630675000  | C | 3.859942000  | -0.612678000 | -3.293864000 |
| O                              | -2.077453000 | 1.117934000  | 2.451347000  | C | 2.506594000  | -0.554210000 | -2.582158000 |
| H                              | -2.103211000 | 1.441156000  | 1.514180000  | C | 0.678577000  | -2.700538000 | 0.277877000  |
| C                              | -1.031306000 | -0.317510000 | 4.027718000  | C | 0.700251000  | -4.087811000 | 0.064060000  |
| H                              | -0.222223000 | 0.224824000  | 4.529980000  | C | 0.152504000  | -4.560025000 | -1.130738000 |
| H                              | -1.954053000 | -0.161457000 | 4.584115000  | C | -0.409508000 | -3.692828000 | -2.072689000 |
| H                              | -0.768155000 | -1.374915000 | 4.001937000  | C | -0.390796000 | -2.336952000 | -1.758035000 |
| C                              | -3.456111000 | -2.208303000 | 2.718453000  | C | -1.014267000 | -4.192206000 | -3.356058000 |
| C                              | -4.019673000 | -1.414497000 | 1.729912000  | C | 1.281199000  | -5.041184000 | 1.075735000  |
| C                              | -3.847515000 | -1.737248000 | 0.353040000  | C | 1.253886000  | -2.050869000 | 1.517848000  |
| C                              | -3.097810000 | -2.908826000 | 0.041989000  | C | 3.211843000  | -1.081453000 | 0.373168000  |
| C                              | -2.518590000 | -3.679676000 | 1.036529000  | C | 4.349857000  | -1.623440000 | 1.254307000  |
| C                              | -2.688980000 | -3.333666000 | 2.384514000  | C | 4.653311000  | -0.717093000 | 2.449902000  |
| H                              | -3.612075000 | -1.953634000 | 3.761674000  | C | 3.375025000  | -0.512757000 | 3.268467000  |
| H                              | -4.598712000 | -0.542295000 | 2.010285000  | C | 2.253317000  | 0.028141000  | 2.381027000  |
| H                              | -2.990458000 | -3.191147000 | -0.998527000 | H | 2.657433000  | 5.913278000  | 0.293430000  |
| H                              | -1.937784000 | -4.555742000 | 0.768069000  | H | -0.002967000 | 2.851254000  | 1.656263000  |
| H                              | -2.241054000 | -3.939385000 | 3.165416000  | H | 0.384396000  | 6.342481000  | 1.855909000  |
| C                              | -4.376136000 | -0.945212000 | -0.699813000 | H | 1.621611000  | 5.663611000  | 2.913856000  |
| H                              | -2.556347000 | 0.033773000  | -0.829034000 | H | 0.014633000  | 4.920926000  | 2.847470000  |
| H                              | -4.264702000 | -1.328807000 | -1.713052000 | H | 4.597424000  | 3.898884000  | -1.751822000 |
| C                              | -5.270302000 | 0.242631000  | -0.512605000 | H | 4.006270000  | 5.555771000  | -1.583297000 |
| H                              | -4.936310000 | 0.851290000  | 0.334929000  | H | 3.329151000  | 4.494620000  | -2.825079000 |
| H                              | -6.287968000 | -0.093082000 | -0.263527000 | H | 1.716271000  | 1.856063000  | -2.759796000 |
| C                              | -5.330142000 | 1.118781000  | -1.780605000 | H | 3.417299000  | 2.078268000  | -2.393482000 |
| H                              | -4.332386000 | 1.457158000  | -2.063519000 | H | 3.564184000  | 1.038530000  | 0.209727000  |
| H                              | -5.746436000 | 0.535595000  | -2.608447000 | H | 5.158602000  | 1.114322000  | -1.557430000 |
| C                              | -6.181915000 | 2.346163000  | -1.574228000 | H | 5.716769000  | -0.069333000 | -0.408949000 |
| O                              | -7.490097000 | 2.039600000  | -1.425160000 | H | 5.956015000  | -0.877149000 | -2.780966000 |
| H                              | -7.984200000 | 2.861927000  | -1.273110000 | H | 4.858064000  | -1.920067000 | -1.888134000 |
| O                              | -5.772863000 | 3.487187000  | -1.524136000 | H | 3.812193000  | -1.388078000 | -4.065115000 |
| <sup>5</sup> IM <sub>pro</sub> |              |              |              | H | 4.061096000  | 0.333422000  | -3.810046000 |
| Mn                             | 0.504710000  | 0.273177000  | -0.212848000 | H | 1.701517000  | -0.284271000 | -3.270050000 |
| N                              | 1.137370000  | 2.397689000  | -0.005021000 | H | 2.264765000  | -1.543509000 | -2.190297000 |
| N                              | 2.458050000  | 0.413469000  | -1.446837000 | H | 0.162547000  | -5.628378000 | -1.328747000 |
| N                              | 0.139761000  | -1.861569000 | -0.622765000 | H | -0.798769000 | -1.601103000 | -2.444233000 |

|   |              |              |              |                                                                                   |              |              |              |
|---|--------------|--------------|--------------|-----------------------------------------------------------------------------------|--------------|--------------|--------------|
| H | -1.862182000 | -4.854528000 | -3.152841000 | C                                                                                 | -6.149878000 | 2.401179000  | -1.544863000 |
| H | -0.283837000 | -4.766427000 | -3.934311000 | O                                                                                 | -7.403563000 | 2.167218000  | -1.096335000 |
| H | -1.368788000 | -3.365303000 | -3.975376000 | H                                                                                 | -7.836102000 | 3.021185000  | -0.931437000 |
| H | 2.344650000  | -4.845292000 | 1.248427000  | O                                                                                 | -5.715112000 | 3.523167000  | -1.699145000 |
| H | 1.182658000  | -6.071569000 | 0.729149000  | <b>Part III. Hydroxylation of PBA to 4-OH-PBA by the</b>                          |              |              |              |
| H | 0.769707000  | -4.957862000 | 2.039784000  | <b>Mn<sup>IV</sup>(O)(AcO•) species 2 generated from the Mn<sup>III</sup>-OOH</b> |              |              |              |
| H | 0.431984000  | -1.784512000 | 2.189762000  | <b>species 1.</b>                                                                 |              |              |              |
| H | 1.894916000  | -2.753975000 | 2.053319000  | <sup>3</sup> RC                                                                   |              |              |              |
| H | 2.941099000  | -1.875604000 | -0.323993000 | Mn                                                                                | 0.885752000  | 0.312146000  | -0.221143000 |
| H | 4.053735000  | -2.611194000 | 1.625163000  | N                                                                                 | 2.264155000  | 1.828269000  | 0.113894000  |
| H | 5.237158000  | -1.795147000 | 0.641493000  | N                                                                                 | 2.537537000  | -0.369116000 | -1.365831000 |
| H | 5.441027000  | -1.161366000 | 3.065912000  | N                                                                                 | -0.363168000 | -1.304345000 | -0.497386000 |
| H | 5.031213000  | 0.254659000  | 2.106271000  | N                                                                                 | 1.688876000  | -1.146488000 | 1.267154000  |
| H | 3.538368000  | 0.194284000  | 4.088178000  | C                                                                                 | 3.233495000  | 1.918673000  | -0.820421000 |
| H | 3.071023000  | -1.462308000 | 3.725421000  | C                                                                                 | 4.206798000  | 2.923881000  | -0.770687000 |
| H | 1.316813000  | 0.119819000  | 2.931302000  | C                                                                                 | 4.135874000  | 3.827177000  | 0.290892000  |
| H | 2.518055000  | 1.031954000  | 2.036573000  | C                                                                                 | 3.143833000  | 3.729273000  | 1.273293000  |
| O | -1.644985000 | 0.577283000  | -1.237610000 | C                                                                                 | 2.221127000  | 2.698076000  | 1.138297000  |
| O | -2.208550000 | 1.861581000  | -0.876845000 | C                                                                                 | 3.072088000  | 4.689283000  | 2.428420000  |
| H | -1.911397000 | 2.429425000  | -1.606189000 | C                                                                                 | 5.283541000  | 3.020898000  | -1.818539000 |
| O | -0.775018000 | 0.412335000  | 1.645592000  | C                                                                                 | 3.170471000  | 0.877107000  | -1.902463000 |
| C | -1.617528000 | 0.976059000  | 2.340338000  | C                                                                                 | 3.493224000  | -1.074150000 | -0.406182000 |
| O | -2.457115000 | 1.877780000  | 1.849477000  | C                                                                                 | 4.651131000  | -1.744106000 | -1.161501000 |
| H | -2.314623000 | 1.992714000  | 0.880162000  | C                                                                                 | 4.178846000  | -2.669847000 | -2.284972000 |
| C | -1.743812000 | 0.763182000  | 3.815367000  | C                                                                                 | 3.280316000  | -1.892497000 | -3.250790000 |
| H | -1.173080000 | 1.553000000  | 4.316969000  | C                                                                                 | 2.109667000  | -1.264719000 | -2.496415000 |
| H | -2.782652000 | 0.842974000  | 4.136707000  | C                                                                                 | -0.345565000 | -2.255634000 | 0.461260000  |
| H | -1.322686000 | -0.202693000 | 4.088600000  | C                                                                                 | -1.090753000 | -3.433370000 | 0.328576000  |
| C | -3.247783000 | -2.121920000 | 2.660179000  | C                                                                                 | -1.858542000 | -3.578530000 | -0.827083000 |
| C | -3.806804000 | -1.312122000 | 1.681718000  | C                                                                                 | -1.895678000 | -2.586796000 | -1.812578000 |
| C | -3.743223000 | -1.681704000 | 0.306839000  | C                                                                                 | -1.124276000 | -1.451991000 | -1.596668000 |
| C | -3.114997000 | -2.920072000 | -0.013726000 | C                                                                                 | -2.730343000 | -2.734960000 | -3.053305000 |
| C | -2.560437000 | -3.719228000 | 0.972709000  | C                                                                                 | -1.062096000 | -4.505418000 | 1.385464000  |
| C | -2.609515000 | -3.321671000 | 2.316244000  | C                                                                                 | 0.500056000  | -1.945261000 | 1.668362000  |
| H | -3.315419000 | -1.828891000 | 3.702768000  | C                                                                                 | 2.656861000  | -2.006208000 | 0.486137000  |
| H | -4.309074000 | -0.394366000 | 1.966625000  | C                                                                                 | 3.456892000  | -2.948349000 | 1.400244000  |
| H | -3.085852000 | -3.235238000 | -1.051242000 | C                                                                                 | 4.128681000  | -2.224504000 | 2.569623000  |
| H | -2.092237000 | -4.658787000 | 0.702738000  | C                                                                                 | 3.073623000  | -1.451847000 | 3.366660000  |
| H | -2.172272000 | -3.947742000 | 3.086998000  | C                                                                                 | 2.327100000  | -0.486573000 | 2.447353000  |
| C | -4.286747000 | -0.876326000 | -0.729007000 | H                                                                                 | 4.876400000  | 4.618757000  | 0.359084000  |
| H | -2.420227000 | -0.019761000 | -1.086076000 | H                                                                                 | 1.435606000  | 2.547021000  | 1.866351000  |
| H | -4.267804000 | -1.284923000 | -1.738388000 | H                                                                                 | 2.932890000  | 5.713684000  | 2.069330000  |
| C | -5.123954000 | 0.345658000  | -0.494887000 | H                                                                                 | 4.001207000  | 4.667581000  | 3.006041000  |
| H | -4.651038000 | 1.008763000  | 0.239153000  | H                                                                                 | 2.244757000  | 4.445075000  | 3.097770000  |
| H | -6.086881000 | 0.053672000  | -0.050735000 | H                                                                                 | 5.927304000  | 2.134901000  | -1.805313000 |
| C | -5.388119000 | 1.124181000  | -1.797788000 | H                                                                                 | 5.911619000  | 3.895323000  | -1.641503000 |
| H | -4.449942000 | 1.394308000  | -2.283711000 | H                                                                                 | 4.857351000  | 3.104922000  | -2.822789000 |
| H | -5.968106000 | 0.499373000  | -2.484943000 | H                                                                                 | 2.548012000  | 1.230765000  | -2.728757000 |



|   |              |              |              |                 |              |              |              |
|---|--------------|--------------|--------------|-----------------|--------------|--------------|--------------|
| H | 4.160903000  | 0.664548000  | -2.303492000 | H               | -5.514654000 | -2.040775000 | -1.247482000 |
| H | 3.914835000  | -0.284999000 | 0.217934000  | H               | -5.757218000 | -4.049777000 | 0.179426000  |
| H | 5.291741000  | -0.962639000 | -1.582354000 | H               | -4.550426000 | -4.191531000 | 2.350396000  |
| H | 5.276178000  | -2.271967000 | -0.438605000 | C               | -4.002634000 | 0.187732000  | -0.779731000 |
| H | 5.044487000  | -3.079997000 | -2.812264000 | H               | -2.968001000 | 0.546278000  | -0.740337000 |
| H | 3.626017000  | -3.523199000 | -1.872688000 | H               | -4.207484000 | -0.061247000 | -1.826773000 |
| H | 2.861883000  | -2.550991000 | -4.017659000 | C               | -4.940407000 | 1.322067000  | -0.335914000 |
| H | 3.859675000  | -1.125251000 | -3.775832000 | H               | -4.772539000 | 1.540456000  | 0.724410000  |
| H | 1.472363000  | -0.663435000 | -3.146298000 | H               | -5.981361000 | 0.995323000  | -0.431690000 |
| H | 1.494268000  | -2.056394000 | -2.071786000 | C               | -4.711590000 | 2.600622000  | -1.165598000 |
| H | -2.450281000 | -4.479296000 | -0.955845000 | H               | -3.671460000 | 2.920749000  | -1.071685000 |
| H | -1.092685000 | -0.630886000 | -2.302413000 | H               | -4.928817000 | 2.405250000  | -2.219270000 |
| H | -3.771869000 | -2.937316000 | -2.788416000 | C               | -5.582430000 | 3.723905000  | -0.666338000 |
| H | -2.375510000 | -3.573598000 | -3.660833000 | O               | -6.815054000 | 3.708159000  | -1.223543000 |
| H | -2.697568000 | -1.831105000 | -3.665130000 | H               | -7.339697000 | 4.423677000  | -0.827927000 |
| H | -0.065473000 | -4.952670000 | 1.466973000  | O               | -5.261609000 | 4.542632000  | 0.170719000  |
| H | -1.770136000 | -5.298288000 | 1.139806000  | <sup>5</sup> RC |              |              |              |
| H | -1.332108000 | -4.107678000 | 2.366952000  | Mn              | 0.877804000  | 0.285588000  | -0.169573000 |
| H | -0.083371000 | -1.343190000 | 2.370978000  | N               | 2.269135000  | 1.843307000  | 0.121411000  |
| H | 0.792974000  | -2.859426000 | 2.186027000  | N               | 2.633784000  | -0.372812000 | -1.422176000 |
| H | 2.040518000  | -2.631080000 | -0.161808000 | N               | -0.383796000 | -1.317662000 | -0.471718000 |
| H | 2.767078000  | -3.700836000 | 1.796502000  | N               | 1.700895000  | -1.115643000 | 1.197881000  |
| H | 4.179253000  | -3.503738000 | 0.798721000  | C               | 3.237960000  | 1.933763000  | -0.809179000 |
| H | 4.639436000  | -2.951208000 | 3.207679000  | C               | 4.184802000  | 2.968449000  | -0.776003000 |
| H | 4.896387000  | -1.531062000 | 2.203008000  | C               | 4.084745000  | 3.897079000  | 0.260071000  |
| H | 3.533457000  | -0.868271000 | 4.169881000  | C               | 3.084632000  | 3.803650000  | 1.234506000  |
| H | 2.374402000  | -2.149649000 | 3.841700000  | C               | 2.191748000  | 2.745931000  | 1.116089000  |
| H | 1.536393000  | 0.053531000  | 2.971151000  | C               | 2.974935000  | 4.794323000  | 2.360515000  |
| H | 3.030995000  | 0.255476000  | 2.067416000  | C               | 5.266762000  | 3.075062000  | -1.818329000 |
| O | 0.175348000  | 1.180534000  | -1.699385000 | C               | 3.229996000  | 0.890534000  | -1.899500000 |
| O | -0.235262000 | 2.576562000  | -1.542803000 | C               | 3.546722000  | -1.082192000 | -0.460490000 |
| H | 0.558493000  | 3.084857000  | -1.772958000 | C               | 4.708091000  | -1.782644000 | -1.184192000 |
| O | -0.409014000 | 1.010805000  | 1.326369000  | C               | 4.234831000  | -2.699750000 | -2.315945000 |
| C | -1.235191000 | 1.920356000  | 1.535514000  | C               | 3.369737000  | -1.903638000 | -3.298872000 |
| O | -1.529030000 | 2.845868000  | 0.667304000  | C               | 2.207254000  | -1.242956000 | -2.558421000 |
| H | -0.995140000 | 2.762857000  | -0.188412000 | C               | -0.344946000 | -2.263490000 | 0.487159000  |
| C | -1.940658000 | 2.031120000  | 2.848985000  | C               | -1.088845000 | -3.442736000 | 0.376241000  |
| H | -1.506559000 | 2.872764000  | 3.399185000  | C               | -1.864742000 | -3.598252000 | -0.773724000 |
| H | -2.998650000 | 2.249665000  | 2.691528000  | C               | -1.906272000 | -2.618867000 | -1.771709000 |
| H | -1.812048000 | 1.118404000  | 3.427976000  | C               | -1.139951000 | -1.476778000 | -1.569103000 |
| C | -3.627500000 | -2.254526000 | 2.127440000  | C               | -2.741858000 | -2.784614000 | -3.009460000 |
| C | -3.477870000 | -1.135652000 | 1.308830000  | C               | -1.057093000 | -4.497680000 | 1.449393000  |
| C | -4.148083000 | -1.043101000 | 0.082288000  | C               | 0.529323000  | -1.924480000 | 1.659779000  |
| C | -4.979868000 | -2.101341000 | -0.303440000 | C               | 2.671182000  | -1.994086000 | 0.419412000  |
| C | -5.119555000 | -3.232594000 | 0.502861000  | C               | 3.438729000  | -2.946790000 | 1.349069000  |
| C | -4.443763000 | -3.312589000 | 1.722495000  | C               | 4.130227000  | -2.225733000 | 2.507953000  |
| H | -3.098010000 | -2.303819000 | 3.074213000  | C               | 3.098303000  | -1.413007000 | 3.294233000  |
| H | -2.825377000 | -0.328568000 | 1.622129000  | C               | 2.366712000  | -0.443680000 | 2.367024000  |

|   |              |              |              |                  |              |              |              |
|---|--------------|--------------|--------------|------------------|--------------|--------------|--------------|
| H | 4.805511000  | 4.708121000  | 0.312131000  | H                | -1.710496000 | 0.810884000  | 3.696299000  |
| H | 1.397241000  | 2.598847000  | 1.835147000  | C                | -3.616656000 | -2.137905000 | 2.061554000  |
| H | 2.825365000  | 5.806168000  | 1.971156000  | C                | -3.514124000 | -1.062190000 | 1.181556000  |
| H | 3.892715000  | 4.805077000  | 2.956523000  | C                | -4.229494000 | -1.038368000 | -0.022733000 |
| H | 2.139226000  | 4.553993000  | 3.021014000  | C                | -5.058176000 | -2.125867000 | -0.323165000 |
| H | 5.927889000  | 2.202095000  | -1.793820000 | C                | -5.152709000 | -3.215824000 | 0.545306000  |
| H | 5.876289000  | 3.963493000  | -1.645465000 | C                | -4.433243000 | -3.225072000 | 1.741908000  |
| H | 4.846837000  | 3.141816000  | -2.826662000 | H                | -3.050624000 | -2.131789000 | 2.988294000  |
| H | 2.621228000  | 1.253521000  | -2.733818000 | H                | -2.859919000 | -0.234398000 | 1.425938000  |
| H | 4.241838000  | 0.742687000  | -2.282698000 | H                | -5.626992000 | -2.121901000 | -1.249050000 |
| H | 3.977092000  | -0.305899000 | 0.174874000  | H                | -5.790324000 | -4.056066000 | 0.287538000  |
| H | 5.361306000  | -1.008592000 | -1.601403000 | H                | -4.505224000 | -4.071709000 | 2.417287000  |
| H | 5.319641000  | -2.319991000 | -0.456473000 | C                | -4.118072000 | 0.144520000  | -0.955041000 |
| H | 5.099920000  | -3.132034000 | -2.826860000 | H                | -3.065087000 | 0.426827000  | -1.066889000 |
| H | 3.655242000  | -3.539833000 | -1.911919000 | H                | -4.476041000 | -0.133378000 | -1.952356000 |
| H | 2.957088000  | -2.553478000 | -4.076585000 | C                | -4.902597000 | 1.368231000  | -0.455675000 |
| H | 3.978512000  | -1.146557000 | -3.806704000 | H                | -4.558355000 | 1.638301000  | 0.548160000  |
| H | 1.597783000  | -0.625328000 | -3.221596000 | H                | -5.965492000 | 1.117537000  | -0.374900000 |
| H | 1.554884000  | -2.020921000 | -2.156986000 | C                | -4.718050000 | 2.573412000  | -1.398799000 |
| H | -2.458477000 | -4.499609000 | -0.888710000 | H                | -3.656454000 | 2.813042000  | -1.495517000 |
| H | -1.116139000 | -0.660795000 | -2.281661000 | H                | -5.115307000 | 2.334210000  | -2.389361000 |
| H | -3.778429000 | -3.006019000 | -2.741020000 | C                | -5.415477000 | 3.793666000  | -0.856590000 |
| H | -2.372278000 | -3.617012000 | -3.616842000 | O                | -6.733627000 | 3.810275000  | -1.160586000 |
| H | -2.727750000 | -1.881143000 | -3.622448000 | H                | -7.133951000 | 4.593071000  | -0.747544000 |
| H | -0.060591000 | -4.943755000 | 1.536737000  | O                | -4.895691000 | 4.662621000  | -0.186828000 |
| H | -1.765500000 | -5.294826000 | 1.219184000  |                  |              |              |              |
| H | -1.324901000 | -4.082011000 | 2.424422000  | <sup>3</sup> TS1 |              |              |              |
| H | -0.032390000 | -1.312960000 | 2.370741000  | Mn               | 0.852977000  | 0.360008000  | -0.232449000 |
| H | 0.858666000  | -2.820122000 | 2.185055000  | N                | 2.260301000  | 1.839083000  | 0.111173000  |
| H | 2.047025000  | -2.604538000 | -0.234531000 | N                | 2.538140000  | -0.361947000 | -1.373909000 |
| H | 2.736382000  | -3.683133000 | 1.752069000  | N                | -0.364949000 | -1.302367000 | -0.484422000 |
| H | 4.147834000  | -3.521225000 | 0.750028000  | N                | 1.702128000  | -1.142390000 | 1.269325000  |
| H | 4.619776000  | -2.956575000 | 3.157601000  | C                | 3.233801000  | 1.921291000  | -0.821818000 |
| H | 4.916862000  | -1.559961000 | 2.131446000  | C                | 4.221028000  | 2.911151000  | -0.758056000 |
| H | 3.576144000  | -0.820804000 | 4.080314000  | C                | 4.161328000  | 3.804338000  | 0.313216000  |
| H | 2.387612000  | -2.082227000 | 3.791728000  | C                | 3.166757000  | 3.712170000  | 1.293126000  |
| H | 1.591194000  | 0.117510000  | 2.889198000  | C                | 2.226924000  | 2.698474000  | 1.145485000  |
| H | 3.082019000  | 0.274408000  | 1.967539000  | C                | 3.108757000  | 4.659969000  | 2.458832000  |
| O | 0.106728000  | 1.187745000  | -1.625395000 | C                | 5.302275000  | 3.003889000  | -1.801629000 |
| O | -0.429582000 | 2.482283000  | -1.304223000 | C                | 3.161835000  | 0.887794000  | -1.909398000 |
| H | 0.281927000  | 3.095820000  | -1.550176000 | C                | 3.492732000  | -1.062339000 | -0.413065000 |
| O | -0.338970000 | 1.029507000  | 1.542094000  | C                | 4.652281000  | -1.729505000 | -1.169888000 |
| C | -1.301262000 | 1.752942000  | 1.829303000  | C                | 4.180665000  | -2.660716000 | -2.288657000 |
| O | -1.820816000 | 2.608700000  | 0.977434000  | C                | 3.278314000  | -1.888714000 | -3.254853000 |
| H | -1.314853000 | 2.596771000  | 0.119928000  | C                | 2.107833000  | -1.259312000 | -2.500738000 |
| C | -1.938001000 | 1.743802000  | 3.182356000  | C                | -0.334736000 | -2.249028000 | 0.478565000  |
| H | -1.520390000 | 2.576761000  | 3.758753000  | C                | -1.070298000 | -3.433757000 | 0.351634000  |
| H | -3.015355000 | 1.895978000  | 3.105480000  | C                | -1.839353000 | -3.591890000 | -0.801322000 |

|   |              |              |              |                  |              |              |              |
|---|--------------|--------------|--------------|------------------|--------------|--------------|--------------|
| C | -1.887919000 | -2.605043000 | -1.790835000 | O                | 0.196534000  | 1.089197000  | -1.642560000 |
| C | -1.127644000 | -1.461992000 | -1.581173000 | O                | -0.340518000 | 2.746084000  | -1.608983000 |
| C | -2.719504000 | -2.767110000 | -3.031781000 | H                | 0.515058000  | 3.199416000  | -1.663328000 |
| C | -1.029787000 | -4.501742000 | 1.412345000  | O                | -0.342687000 | 1.027335000  | 1.240974000  |
| C | 0.514244000  | -1.932235000 | 1.680176000  | C                | -1.210892000 | 1.925330000  | 1.422133000  |
| C | 2.662643000  | -1.997880000 | 0.480712000  | O                | -1.534844000 | 2.806493000  | 0.547074000  |
| C | 3.469829000  | -2.939615000 | 1.389679000  | H                | -0.983490000 | 2.777793000  | -0.370261000 |
| C | 4.150500000  | -2.214043000 | 2.552906000  | C                | -1.891289000 | 2.021379000  | 2.751388000  |
| C | 3.102546000  | -1.438337000 | 3.356531000  | H                | -1.443918000 | 2.859283000  | 3.297266000  |
| C | 2.348312000  | -0.475395000 | 2.440407000  | H                | -2.951505000 | 2.242204000  | 2.616099000  |
| H | 4.913890000  | 4.583473000  | 0.390869000  | H                | -1.750212000 | 1.107348000  | 3.325598000  |
| H | 1.435994000  | 2.553963000  | 1.868334000  | C                | -3.631814000 | -2.291033000 | 2.127015000  |
| H | 2.995503000  | 5.691073000  | 2.110280000  | C                | -3.485139000 | -1.156853000 | 1.329005000  |
| H | 4.033517000  | 4.609776000  | 3.041581000  | C                | -4.144804000 | -1.049172000 | 0.098040000  |
| H | 2.271818000  | 4.426910000  | 3.119978000  | C                | -4.963774000 | -2.107970000 | -0.313112000 |
| H | 5.935621000  | 2.110544000  | -1.793090000 | C                | -5.100292000 | -3.254108000 | 0.472234000  |
| H | 5.939667000  | 3.869401000  | -1.614896000 | C                | -4.434409000 | -3.349267000 | 1.696368000  |
| H | 4.880225000  | 3.101357000  | -2.806225000 | H                | -3.111025000 | -2.351492000 | 3.077903000  |
| H | 2.530887000  | 1.246602000  | -2.726822000 | H                | -2.845847000 | -0.347855000 | 1.664083000  |
| H | 4.148771000  | 0.678409000  | -2.320497000 | H                | -5.490653000 | -2.035685000 | -1.260717000 |
| H | 3.913661000  | -0.272290000 | 0.209889000  | H                | -5.727649000 | -4.071222000 | 0.129109000  |
| H | 5.288331000  | -0.946556000 | -1.594610000 | H                | -4.538704000 | -4.239906000 | 2.307950000  |
| H | 5.280788000  | -2.251701000 | -0.445962000 | C                | -4.004835000 | 0.197930000  | -0.741174000 |
| H | 5.046490000  | -3.069638000 | -2.816535000 | H                | -2.977644000 | 0.573476000  | -0.679154000 |
| H | 3.631557000  | -3.514511000 | -1.872473000 | H                | -4.189111000 | -0.037099000 | -1.795247000 |
| H | 2.858235000  | -2.550282000 | -4.018095000 | C                | -4.967943000 | 1.309699000  | -0.294312000 |
| H | 3.854739000  | -1.122290000 | -3.784221000 | H                | -4.815764000 | 1.517315000  | 0.770547000  |
| H | 1.470498000  | -0.659596000 | -3.151562000 | H                | -6.001604000 | 0.965456000  | -0.406379000 |
| H | 1.492489000  | -2.049467000 | -2.073195000 | C                | -4.752342000 | 2.602549000  | -1.105248000 |
| H | -2.421887000 | -4.499236000 | -0.924914000 | H                | -3.720469000 | 2.941502000  | -0.990562000 |
| H | -1.106498000 | -0.644886000 | -2.291411000 | H                | -4.950015000 | 2.415666000  | -2.164297000 |
| H | -3.754584000 | -3.000271000 | -2.767828000 | C                | -5.653032000 | 3.701935000  | -0.605998000 |
| H | -2.340930000 | -3.591076000 | -3.645092000 | O                | -6.875188000 | 3.671515000  | -1.185389000 |
| H | -2.711919000 | -1.858491000 | -3.637264000 | H                | -7.419786000 | 4.371755000  | -0.789410000 |
| H | -0.030468000 | -4.943524000 | 1.489698000  | O                | -5.362591000 | 4.514443000  | 0.248095000  |
| H | -1.734695000 | -5.299099000 | 1.172560000  | <sup>5</sup> TS1 |              |              |              |
| H | -1.297052000 | -4.102522000 | 2.393906000  | Mn               | 0.881867000  | 0.279850000  | -0.218857000 |
| H | -0.064678000 | -1.323852000 | 2.381138000  | N                | 2.247518000  | 1.840828000  | 0.134617000  |
| H | 0.804751000  | -2.844199000 | 2.203185000  | N                | 2.670966000  | -0.354362000 | -1.418420000 |
| H | 2.043851000  | -2.623190000 | -0.164421000 | N                | -0.363049000 | -1.337663000 | -0.496771000 |
| H | 2.782197000  | -3.690789000 | 1.792022000  | N                | 1.704031000  | -1.105711000 | 1.186371000  |
| H | 4.187152000  | -3.496366000 | 0.783488000  | C                | 3.224587000  | 1.961640000  | -0.782760000 |
| H | 4.664454000  | -2.940250000 | 3.188887000  | C                | 4.138154000  | 3.025141000  | -0.738798000 |
| H | 4.916916000  | -1.522679000 | 2.179846000  | C                | 3.993383000  | 3.953654000  | 0.291868000  |
| H | 3.569306000  | -0.852174000 | 4.153766000  | C                | 2.983126000  | 3.829488000  | 1.251835000  |
| H | 2.406781000  | -2.134001000 | 3.839543000  | C                | 2.126560000  | 2.742976000  | 1.123985000  |
| H | 1.561565000  | 0.065495000  | 2.969425000  | C                | 2.824696000  | 4.817507000  | 2.374493000  |
| H | 3.049215000  | 0.265548000  | 2.053446000  | C                | 5.231026000  | 3.161617000  | -1.766126000 |

|   |              |              |              |                  |              |              |              |
|---|--------------|--------------|--------------|------------------|--------------|--------------|--------------|
| C | 3.272917000  | 0.918241000  | -1.870804000 | H                | 2.074320000  | -2.592437000 | -0.242929000 |
| C | 3.569588000  | -1.061045000 | -0.438775000 | H                | 2.742346000  | -3.671062000 | 1.753409000  |
| C | 4.750207000  | -1.750623000 | -1.142240000 | H                | 4.163656000  | -3.504408000 | 0.767106000  |
| C | 4.307017000  | -2.671239000 | -2.282309000 | H                | 4.605623000  | -2.938155000 | 3.181659000  |
| C | 3.460231000  | -1.877152000 | -3.281530000 | H                | 4.914218000  | -1.543128000 | 2.157086000  |
| C | 2.276421000  | -1.223749000 | -2.570386000 | H                | 3.550731000  | -0.799600000 | 4.086381000  |
| C | -0.332309000 | -2.270229000 | 0.475376000  | H                | 2.367541000  | -2.063869000 | 3.790509000  |
| C | -1.078264000 | -3.449372000 | 0.376854000  | H                | 1.575429000  | 0.130571000  | 2.873483000  |
| C | -1.851319000 | -3.618530000 | -0.772820000 | H                | 3.074437000  | 0.290236000  | 1.967715000  |
| C | -1.885785000 | -2.652561000 | -1.784052000 | O                | 0.281785000  | 1.060885000  | -1.698107000 |
| C | -1.115077000 | -1.511398000 | -1.595926000 | O                | -1.021956000 | 2.609020000  | -1.463092000 |
| C | -2.717999000 | -2.831468000 | -3.022315000 | H                | -0.303048000 | 3.218806000  | -1.713896000 |
| C | -1.049518000 | -4.490818000 | 1.463070000  | O                | -0.347397000 | 0.984542000  | 1.510076000  |
| C | 0.537473000  | -1.921677000 | 1.646854000  | C                | -1.294634000 | 1.700536000  | 1.860269000  |
| C | 2.685850000  | -1.980989000 | 0.422205000  | O                | -1.869365000 | 2.565684000  | 1.058925000  |
| C | 3.446686000  | -2.932219000 | 1.358866000  | H                | -1.458918000 | 2.565496000  | 0.147612000  |
| C | 4.123352000  | -2.208735000 | 2.525038000  | C                | -1.851394000 | 1.666618000  | 3.248791000  |
| C | 3.081622000  | -1.395044000 | 3.297485000  | H                | -1.392750000 | 2.482232000  | 3.818732000  |
| C | 2.357451000  | -0.429454000 | 2.360465000  | H                | -2.929933000 | 1.828890000  | 3.237094000  |
| H | 4.686362000  | 4.788036000  | 0.351184000  | H                | -1.603291000 | 0.720769000  | 3.728431000  |
| H | 1.329315000  | 2.572541000  | 1.833523000  | C                | -3.620741000 | -2.162322000 | 2.058071000  |
| H | 2.660313000  | 5.825642000  | 1.981610000  | C                | -3.511190000 | -1.083823000 | 1.182199000  |
| H | 3.728137000  | 4.849638000  | 2.991394000  | C                | -4.212234000 | -1.058796000 | -0.030558000 |
| H | 1.980192000  | 4.557467000  | 3.016136000  | C                | -5.034796000 | -2.147741000 | -0.342674000 |
| H | 5.919898000  | 2.310780000  | -1.727493000 | C                | -5.136448000 | -3.240272000 | 0.521759000  |
| H | 5.808993000  | 4.070166000  | -1.589460000 | C                | -4.430476000 | -3.250977000 | 1.726277000  |
| H | 4.823938000  | 3.209687000  | -2.780864000 | H                | -3.065885000 | -2.156870000 | 2.991575000  |
| H | 2.699956000  | 1.273920000  | -2.732498000 | H                | -2.863713000 | -0.254196000 | 1.437599000  |
| H | 4.302607000  | 0.774597000  | -2.204925000 | H                | -5.593509000 | -2.142680000 | -1.274646000 |
| H | 3.981658000  | -0.281863000 | 0.204325000  | H                | -5.769174000 | -4.081286000 | 0.254632000  |
| H | 5.405769000  | -0.971769000 | -1.546106000 | H                | -4.507974000 | -4.099500000 | 2.398669000  |
| H | 5.350146000  | -2.281620000 | -0.400505000 | C                | -4.092365000 | 0.125319000  | -0.960522000 |
| H | 5.185293000  | -3.097792000 | -2.774979000 | H                | -3.035975000 | 0.389556000  | -1.086973000 |
| H | 3.723698000  | -3.514708000 | -1.891344000 | H                | -4.468459000 | -0.144274000 | -1.953453000 |
| H | 3.067343000  | -2.525945000 | -4.070231000 | C                | -4.848472000 | 1.361509000  | -0.447774000 |
| H | 4.076166000  | -1.115304000 | -3.773320000 | H                | -4.470220000 | 1.635222000  | 0.542851000  |
| H | 1.683782000  | -0.604850000 | -3.246646000 | H                | -5.911074000 | 1.123709000  | -0.332958000 |
| H | 1.614268000  | -2.002385000 | -2.187288000 | C                | -4.680220000 | 2.556190000  | -1.407562000 |
| H | -2.447279000 | -4.519638000 | -0.877488000 | H                | -3.619708000 | 2.773993000  | -1.554711000 |
| H | -1.080302000 | -0.709017000 | -2.322384000 | H                | -5.124853000 | 2.316022000  | -2.377869000 |
| H | -3.755232000 | -3.049560000 | -2.754333000 | C                | -5.330848000 | 3.795591000  | -0.851178000 |
| H | -2.347079000 | -3.670483000 | -3.619692000 | O                | -6.668742000 | 3.807979000  | -1.052626000 |
| H | -2.701974000 | -1.934554000 | -3.644811000 | H                | -7.034074000 | 4.606213000  | -0.636779000 |
| H | -0.054958000 | -4.940635000 | 1.553578000  | O                | -4.759797000 | 4.684613000  | -0.253250000 |
| H | -1.762419000 | -5.287147000 | 1.244331000  | <sup>3</sup> IM1 |              |              |              |
| H | -1.313141000 | -4.061951000 | 2.433470000  | Mn               | 0.821312000  | 0.387645000  | -0.096499000 |
| H | -0.029708000 | -1.313737000 | 2.355908000  | N                | 2.244304000  | 1.868603000  | 0.235336000  |
| H | 0.871818000  | -2.814194000 | 2.174137000  | N                | 2.467135000  | -0.199861000 | -1.463197000 |

|   |              |              |              |   |              |              |              |
|---|--------------|--------------|--------------|---|--------------|--------------|--------------|
| N | -0.330845000 | -1.303616000 | -0.395473000 | H | -1.209250000 | -0.540800000 | -2.100463000 |
| N | 1.872313000  | -1.217456000 | 1.185111000  | H | -3.854376000 | -2.873456000 | -2.540262000 |
| C | 3.136134000  | 2.054237000  | -0.760962000 | H | -2.510144000 | -3.452971000 | -3.527273000 |
| C | 4.098160000  | 3.067028000  | -0.689714000 | H | -2.851215000 | -1.716385000 | -3.435780000 |
| C | 4.093800000  | 3.871868000  | 0.451741000  | H | 0.173352000  | -5.051131000 | 1.330004000  |
| C | 3.174361000  | 3.677171000  | 1.487727000  | H | -1.547556000 | -5.401715000 | 1.113314000  |
| C | 2.251759000  | 2.648174000  | 1.329836000  | H | -1.029919000 | -4.269366000 | 2.365726000  |
| C | 3.173559000  | 4.534664000  | 2.722699000  | H | 0.213890000  | -1.515243000 | 2.431534000  |
| C | 5.094046000  | 3.278372000  | -1.799065000 | H | 1.086961000  | -3.001246000 | 2.067520000  |
| C | 2.998859000  | 1.119233000  | -1.927305000 | H | 2.111085000  | -2.560275000 | -0.400095000 |
| C | 3.505818000  | -0.945200000 | -0.634271000 | H | 3.037965000  | -3.766630000 | 1.389437000  |
| C | 4.617465000  | -1.512206000 | -1.533451000 | H | 4.341810000  | -3.456155000 | 0.280198000  |
| C | 4.081444000  | -2.363052000 | -2.686021000 | H | 5.024386000  | -3.087748000 | 2.673640000  |
| C | 3.086255000  | -1.544455000 | -3.511955000 | H | 5.165663000  | -1.588130000 | 1.767581000  |
| C | 1.962538000  | -1.014898000 | -2.619968000 | H | 3.992478000  | -1.105496000 | 3.898830000  |
| C | -0.211082000 | -2.309327000 | 0.499127000  | H | 2.827946000  | -2.386802000 | 3.592282000  |
| C | -0.950208000 | -3.488918000 | 0.354554000  | H | 1.866129000  | -0.148828000 | 2.983503000  |
| C | -1.799510000 | -3.584895000 | -0.748607000 | H | 3.258253000  | 0.162963000  | 1.955631000  |
| C | -1.923345000 | -2.544119000 | -1.673982000 | O | -0.026126000 | 1.289471000  | -1.229856000 |
| C | -1.167410000 | -1.401400000 | -1.445456000 | O | -1.623410000 | 3.919460000  | -2.063727000 |
| C | -2.835043000 | -2.645729000 | -2.863640000 | H | -2.473623000 | 4.174981000  | -1.664148000 |
| C | -0.830634000 | -4.613763000 | 1.347701000  | O | -0.172730000 | 0.909484000  | 1.412151000  |
| C | 0.736380000  | -2.061255000 | 1.640097000  | C | -1.249430000 | 1.673149000  | 1.306716000  |
| C | 2.772837000  | -1.976220000 | 0.240676000  | O | -1.685804000 | 2.066065000  | 0.228922000  |
| C | 3.674330000  | -2.968739000 | 0.993449000  | H | -1.303937000 | 3.196970000  | -1.507573000 |
| C | 4.445393000  | -2.323631000 | 2.147814000  | C | -1.879148000 | 2.040498000  | 2.624417000  |
| C | 3.463639000  | -1.639518000 | 3.103958000  | H | -1.259304000 | 2.814472000  | 3.088645000  |
| C | 2.611053000  | -0.624411000 | 2.343284000  | H | -2.883338000 | 2.431660000  | 2.466894000  |
| H | 4.829398000  | 4.666210000  | 0.536481000  | H | -1.894607000 | 1.174260000  | 3.287821000  |
| H | 1.509477000  | 2.426032000  | 2.084700000  | C | -3.357612000 | -2.170103000 | 2.201976000  |
| H | 3.037689000  | 5.587743000  | 2.458634000  | C | -3.503579000 | -1.141373000 | 1.273664000  |
| H | 4.128486000  | 4.448155000  | 3.250130000  | C | -4.359407000 | -1.272478000 | 0.170880000  |
| H | 2.374538000  | 4.245230000  | 3.407860000  | C | -5.067701000 | -2.470674000 | 0.024209000  |
| H | 5.741100000  | 2.403310000  | -1.921410000 | C | -4.915692000 | -3.512905000 | 0.943079000  |
| H | 5.729392000  | 4.138036000  | -1.581369000 | C | -4.062235000 | -3.365441000 | 2.037068000  |
| H | 4.593228000  | 3.458773000  | -2.755001000 | H | -2.690622000 | -2.041155000 | 3.049309000  |
| H | 2.287260000  | 1.528457000  | -2.650851000 | H | -2.942506000 | -0.224772000 | 1.404272000  |
| H | 3.949695000  | 0.983914000  | -2.441927000 | H | -5.741250000 | -2.590911000 | -0.820083000 |
| H | 3.956057000  | -0.194433000 | 0.015082000  | H | -5.468964000 | -4.436865000 | 0.804869000  |
| H | 5.197923000  | -0.676707000 | -1.936230000 | H | -3.944739000 | -4.172703000 | 2.752929000  |
| H | 5.312848000  | -2.071162000 | -0.904507000 | C | -4.476862000 | -0.164661000 | -0.850730000 |
| H | 4.912845000  | -2.697315000 | -3.312344000 | H | -3.503538000 | -0.026948000 | -1.337347000 |
| H | 3.591127000  | -3.266336000 | -2.302609000 | H | -5.176359000 | -0.463375000 | -1.638705000 |
| H | 2.620592000  | -2.154429000 | -4.291336000 | C | -4.904808000 | 1.190819000  | -0.270650000 |
| H | 3.597108000  | -0.718729000 | -4.018734000 | H | -4.230216000 | 1.468934000  | 0.543334000  |
| H | 1.262071000  | -0.386064000 | -3.171082000 | H | -5.911173000 | 1.123634000  | 0.152943000  |
| H | 1.403055000  | -1.855349000 | -2.212344000 | C | -4.854862000 | 2.280715000  | -1.357866000 |
| H | -2.384030000 | -4.488991000 | -0.883954000 | H | -3.899264000 | 2.245759000  | -1.884746000 |

|                  |              |              |              |   |              |              |              |
|------------------|--------------|--------------|--------------|---|--------------|--------------|--------------|
| H                | -5.653794000 | 2.114171000  | -2.088877000 | H | 5.261898000  | -0.862509000 | -1.671583000 |
| C                | -5.005335000 | 3.669224000  | -0.797894000 | H | 5.307368000  | -2.181575000 | -0.539016000 |
| O                | -6.191374000 | 3.866243000  | -0.195262000 | H | 5.040187000  | -2.973364000 | -2.916131000 |
| H                | -6.216845000 | 4.772509000  | 0.154460000  | H | 3.658338000  | -3.465108000 | -1.947457000 |
| O                | -4.160948000 | 4.547481000  | -0.852032000 | H | 2.811330000  | -2.493652000 | -4.060476000 |
| <sup>5</sup> IM1 |              |              |              | H | 3.780778000  | -1.045401000 | -3.834853000 |
| Mn               | 0.800338000  | 0.350961000  | -0.170446000 | H | 1.402510000  | -0.644768000 | -3.140172000 |
| N                | 2.191116000  | 1.857079000  | 0.115469000  | H | 1.483589000  | -2.046731000 | -2.078477000 |
| N                | 2.511610000  | -0.343449000 | -1.388959000 | H | -2.376917000 | -4.543695000 | -0.923287000 |
| N                | -0.353553000 | -1.334662000 | -0.457271000 | H | -1.127127000 | -0.651379000 | -2.243896000 |
| N                | 1.733938000  | -1.168118000 | 1.256231000  | H | -3.711384000 | -3.123524000 | -2.750232000 |
| C                | 3.154580000  | 1.951616000  | -0.827854000 | H | -2.264650000 | -3.540098000 | -3.675067000 |
| C                | 4.128938000  | 2.953851000  | -0.768249000 | H | -2.779091000 | -1.849226000 | -3.558912000 |
| C                | 4.066715000  | 3.843603000  | 0.306119000  | H | 0.036200000  | -4.983051000 | 1.488280000  |
| C                | 3.080392000  | 3.739513000  | 1.293263000  | H | -1.659059000 | -5.366543000 | 1.155945000  |
| C                | 2.150830000  | 2.715963000  | 1.151859000  | H | -1.251683000 | -4.169645000 | 2.388698000  |
| C                | 3.019779000  | 4.685017000  | 2.460440000  | H | -0.004934000 | -1.397446000 | 2.403935000  |
| C                | 5.199437000  | 3.066195000  | -1.821083000 | H | 0.889487000  | -2.898693000 | 2.182990000  |
| C                | 3.078666000  | 0.930348000  | -1.923256000 | H | 2.084514000  | -2.625234000 | -0.200486000 |
| C                | 3.495614000  | -1.029823000 | -0.454908000 | H | 2.876647000  | -3.693307000 | 1.735200000  |
| C                | 4.653077000  | -1.664933000 | -1.243867000 | H | 4.258911000  | -3.458810000 | 0.704090000  |
| C                | 4.176914000  | -2.592510000 | -2.363745000 | H | 4.763597000  | -2.914243000 | 3.107962000  |
| C                | 3.235660000  | -1.831006000 | -3.300761000 | H | 4.973282000  | -1.484626000 | 2.106503000  |
| C                | 2.068652000  | -1.236780000 | -2.511196000 | H | 3.644094000  | -0.853462000 | 4.105490000  |
| C                | -0.296111000 | -2.295830000 | 0.491930000  | H | 2.503502000  | -2.157666000 | 3.803827000  |
| C                | -1.023337000 | -3.483131000 | 0.354979000  | H | 1.596224000  | 0.028233000  | 2.965938000  |
| C                | -1.801528000 | -3.632831000 | -0.793812000 | H | 3.063395000  | 0.267370000  | 2.024136000  |
| C                | -1.869522000 | -2.634319000 | -1.769711000 | O | 0.110472000  | 1.088510000  | -1.659569000 |
| C                | -1.124747000 | -1.482408000 | -1.549317000 | O | -0.534112000 | 3.182319000  | -1.532957000 |
| C                | -2.703708000 | -2.789737000 | -3.009522000 | H | 0.292032000  | 3.609902000  | -1.266453000 |
| C                | -0.970188000 | -4.558802000 | 1.406757000  | O | -0.260288000 | 0.925210000  | 1.273198000  |
| C                | 0.567992000  | -1.985299000 | 1.681629000  | C | -1.268927000 | 1.740268000  | 1.516576000  |
| C                | 2.700631000  | -1.992673000 | 0.439589000  | O | -1.766587000 | 2.492754000  | 0.683575000  |
| C                | 3.541252000  | -2.923959000 | 1.329223000  | H | -1.021916000 | 2.936291000  | -0.698588000 |
| C                | 4.226177000  | -2.193107000 | 2.485995000  | C | -1.736069000 | 1.708427000  | 2.950014000  |
| C                | 3.176721000  | -1.445604000 | 3.313305000  | H | -1.092412000 | 2.379551000  | 3.529348000  |
| C                | 2.385916000  | -0.489950000 | 2.420177000  | H | -2.762512000 | 2.069941000  | 3.012758000  |
| H                | 4.810418000  | 4.631500000  | 0.379321000  | H | -1.648433000 | 0.708476000  | 3.376149000  |
| H                | 1.362171000  | 2.561071000  | 1.874546000  | C | -3.598758000 | -2.290339000 | 2.048984000  |
| H                | 2.914253000  | 5.717176000  | 2.113076000  | C | -3.478709000 | -1.155884000 | 1.247671000  |
| H                | 3.941242000  | 4.627894000  | 3.047824000  | C | -4.155195000 | -1.057099000 | 0.024725000  |
| H                | 2.178200000  | 4.454292000  | 3.116298000  | C | -4.966768000 | -2.126370000 | -0.373066000 |
| H                | 5.840194000  | 2.178347000  | -1.828397000 | C | -5.078052000 | -3.273337000 | 0.415876000  |
| H                | 5.831244000  | 3.934799000  | -1.630288000 | C | -4.393794000 | -3.359547000 | 1.630363000  |
| H                | 4.766402000  | 3.172372000  | -2.820073000 | H | -3.063971000 | -2.342556000 | 2.992680000  |
| H                | 2.406259000  | 1.285201000  | -2.709046000 | H | -2.847786000 | -0.337331000 | 1.572132000  |
| H                | 4.056349000  | 0.755125000  | -2.371118000 | H | -5.507900000 | -2.062168000 | -1.313165000 |
| H                | 3.913666000  | -0.238296000 | 0.168162000  | H | -5.700621000 | -4.098214000 | 0.082697000  |

|                  |              |              |              |   |              |              |              |
|------------------|--------------|--------------|--------------|---|--------------|--------------|--------------|
| H                | -4.478376000 | -4.250851000 | 2.244002000  | H | 1.944645000  | 5.491785000  | 2.202716000  |
| C                | -4.028665000 | 0.187480000  | -0.820934000 | H | 3.536905000  | 4.862531000  | 2.638711000  |
| H                | -2.983753000 | 0.515394000  | -0.846521000 | H | 2.071401000  | 4.088339000  | 3.273491000  |
| H                | -4.317911000 | -0.035155000 | -1.854000000 | H | 4.693303000  | 2.659891000  | -2.510825000 |
| C                | -4.887374000 | 1.346674000  | -0.290832000 | H | 4.438205000  | 4.386479000  | -2.233586000 |
| H                | -4.597044000 | 1.570321000  | 0.741211000  | H | 3.285235000  | 3.466538000  | -3.210808000 |
| H                | -5.940913000 | 1.047988000  | -0.273207000 | H | 1.351103000  | 1.202800000  | -2.725729000 |
| C                | -4.712852000 | 2.610591000  | -1.155167000 | H | 3.099055000  | 0.962378000  | -2.719634000 |
| H                | -3.660113000 | 2.898323000  | -1.176724000 | H | 3.566835000  | -0.019267000 | -0.181566000 |
| H                | -5.049380000 | 2.411375000  | -2.176615000 | H | 4.698415000  | -0.423370000 | -2.207203000 |
| C                | -5.493226000 | 3.765161000  | -0.584072000 | H | 5.141588000  | -1.705185000 | -1.117713000 |
| O                | -6.793811000 | 3.743169000  | -0.958265000 | H | 4.656508000  | -2.552208000 | -3.440695000 |
| H                | -7.250124000 | 4.482517000  | -0.523831000 | H | 3.537244000  | -3.262252000 | -2.285155000 |
| O                | -5.051043000 | 4.615329000  | 0.161392000  | H | 2.231900000  | -2.457171000 | -4.230489000 |
| <sup>3</sup> TS2 |              |              |              | H | 2.968283000  | -0.865467000 | -4.118727000 |
| Mn               | 0.395958000  | 0.040365000  | 0.006010000  | H | 0.684217000  | -0.884056000 | -3.066671000 |
| N                | 1.614589000  | 1.719536000  | 0.118565000  | H | 1.174979000  | -2.243234000 | -2.060327000 |
| N                | 1.973773000  | -0.380056000 | -1.496446000 | H | -1.915895000 | -5.367937000 | -0.141628000 |
| N                | -0.421612000 | -1.849841000 | -0.105974000 | H | -1.400805000 | -1.479334000 | -1.883660000 |
| N                | 1.818172000  | -1.253774000 | 1.256971000  | H | -3.397793000 | -4.532595000 | -2.131549000 |
| C                | 2.330671000  | 1.986503000  | -0.994135000 | H | -1.885129000 | -4.596012000 | -3.042210000 |
| C                | 3.140734000  | 3.123545000  | -1.083095000 | H | -2.838763000 | -3.105645000 | -3.022593000 |
| C                | 3.189148000  | 3.963196000  | 0.031148000  | H | 0.680471000  | -5.211462000 | 2.085797000  |
| C                | 2.471261000  | 3.676360000  | 1.195440000  | H | -0.963615000 | -5.849035000 | 1.961294000  |
| C                | 1.688672000  | 2.527473000  | 1.189323000  | H | -0.620472000 | -4.483614000 | 3.034208000  |
| C                | 2.509669000  | 4.574748000  | 2.399674000  | H | 0.359700000  | -1.674512000 | 2.702027000  |
| C                | 3.931272000  | 3.425129000  | -2.328961000 | H | 1.413393000  | -3.045059000 | 2.356066000  |
| C                | 2.210093000  | 0.970076000  | -2.089372000 | H | 2.099054000  | -2.662090000 | -0.265241000 |
| C                | 3.194858000  | -0.877644000 | -0.740314000 | H | 3.372398000  | -3.592152000 | 1.473355000  |
| C                | 4.308735000  | -1.314975000 | -1.706001000 | H | 4.494604000  | -3.173368000 | 0.210108000  |
| C                | 3.834598000  | -2.318215000 | -2.758577000 | H | 5.353706000  | -2.544579000 | 2.491287000  |
| C                | 2.648930000  | -1.730352000 | -3.527295000 | H | 5.172372000  | -1.108247000 | 1.493065000  |
| C                | 1.531949000  | -1.342990000 | -2.557025000 | H | 4.161467000  | -0.649951000 | 3.710671000  |
| C                | -0.114675000 | -2.706492000 | 0.891194000  | H | 3.176649000  | -2.102740000 | 3.603678000  |
| C                | -0.675044000 | -3.988839000 | 0.933021000  | H | 1.843401000  | -0.065395000 | 2.977069000  |
| C                | -1.491467000 | -4.368500000 | -0.134546000 | H | 3.067478000  | 0.353154000  | 1.784882000  |
| C                | -1.746208000 | -3.508895000 | -1.206971000 | O | -0.617767000 | 0.670447000  | -1.185441000 |
| C                | -1.220640000 | -2.224823000 | -1.121813000 | O | -0.422906000 | 4.611220000  | -0.164784000 |
| C                | -2.516582000 | -3.954755000 | -2.417725000 | H | -1.311223000 | 4.983929000  | -0.299342000 |
| C                | -0.378965000 | -4.933884000 | 2.066983000  | O | -0.478780000 | 0.390528000  | 1.622486000  |
| C                | 0.878842000  | -2.209191000 | 1.902275000  | C | -1.233115000 | 1.397649000  | 2.048357000  |
| C                | 2.723780000  | -1.943520000 | 0.266103000  | O | -1.444075000 | 2.415397000  | 1.408286000  |
| C                | 3.836933000  | -2.739914000 | 0.966297000  | H | -0.589930000 | 3.807102000  | 0.349805000  |
| C                | 4.615186000  | -1.911811000 | 1.991264000  | C | -1.759893000 | 1.173371000  | 3.446706000  |
| C                | 3.642203000  | -1.309048000 | 3.008667000  | H | -0.978436000 | 1.471306000  | 4.154318000  |
| C                | 2.578760000  | -0.481904000 | 2.287002000  | H | -2.640148000 | 1.794241000  | 3.614054000  |
| H                | 3.810752000  | 4.852840000  | -0.006510000 | H | -1.985735000 | 0.120799000  | 3.623563000  |
| H                | 1.122633000  | 2.237096000  | 2.060562000  | C | -4.050722000 | -2.168944000 | 1.528662000  |

|                  |              |              |              |   |              |              |              |
|------------------|--------------|--------------|--------------|---|--------------|--------------|--------------|
| C                | -3.622974000 | -0.993103000 | 0.933157000  | C | -0.031455000 | -4.888863000 | 1.820514000  |
| C                | -3.898394000 | -0.726790000 | -0.428027000 | C | 1.108497000  | -2.105068000 | 1.816518000  |
| C                | -4.636754000 | -1.679349000 | -1.163857000 | C | 2.963523000  | -1.695589000 | 0.217627000  |
| C                | -5.101686000 | -2.838386000 | -0.556843000 | C | 4.103509000  | -2.455394000 | 0.915588000  |
| C                | -4.794681000 | -3.097578000 | 0.785281000  | C | 4.827744000  | -1.616468000 | 1.970425000  |
| H                | -3.809701000 | -2.371093000 | 2.566694000  | C | 3.816047000  | -1.088614000 | 2.991258000  |
| H                | -3.048494000 | -0.279574000 | 1.506854000  | C | 2.717536000  | -0.295930000 | 2.282885000  |
| H                | -4.852078000 | -1.486126000 | -2.209836000 | H | 3.700320000  | 5.203435000  | 0.060690000  |
| H                | -5.687883000 | -3.551356000 | -1.126531000 | H | 1.066626000  | 2.469363000  | 2.050640000  |
| H                | -5.130826000 | -4.018463000 | 1.249977000  | H | 1.960270000  | 5.845563000  | 2.175282000  |
| C                | -3.425222000 | 0.516704000  | -1.076657000 | H | 3.375787000  | 5.010261000  | 2.819050000  |
| H                | -2.277053000 | 0.570576000  | -0.982320000 | H | 1.748917000  | 4.438892000  | 3.233444000  |
| H                | -3.604384000 | 0.480075000  | -2.156102000 | H | 4.767538000  | 3.057490000  | -2.410407000 |
| C                | -3.967102000 | 1.829245000  | -0.493874000 | H | 4.415062000  | 4.768790000  | -2.143993000 |
| H                | -3.731813000 | 1.906232000  | 0.569709000  | H | 3.339165000  | 3.789780000  | -3.151564000 |
| H                | -5.058042000 | 1.814538000  | -0.586512000 | H | 1.480462000  | 1.459590000  | -2.712684000 |
| C                | -3.390703000 | 3.035462000  | -1.246069000 | H | 3.235900000  | 1.294903000  | -2.689744000 |
| H                | -2.301723000 | 3.038820000  | -1.192815000 | H | 3.731826000  | 0.275190000  | -0.171054000 |
| H                | -3.675436000 | 2.977793000  | -2.304022000 | H | 4.883601000  | -0.037616000 | -2.206387000 |
| C                | -3.885820000 | 4.361187000  | -0.727569000 | H | 5.372509000  | -1.326709000 | -1.146214000 |
| O                | -5.226345000 | 4.426079000  | -0.651857000 | H | 4.921321000  | -2.135949000 | -3.489337000 |
| H                | -5.477535000 | 5.304839000  | -0.321794000 | H | 3.831066000  | -2.916072000 | -2.351901000 |
| O                | -3.180645000 | 5.304671000  | -0.414699000 | H | 2.495883000  | -2.120728000 | -4.279987000 |
| <sup>5</sup> TS2 |              |              |              | H | 3.167832000  | -0.503757000 | -4.133340000 |
| Mn               | 0.570132000  | 0.205444000  | 0.032420000  | H | 0.885969000  | -0.634613000 | -3.084662000 |
| N                | 1.662509000  | 1.964045000  | 0.132126000  | H | 1.428474000  | -1.995391000 | -2.106443000 |
| N                | 2.157554000  | -0.114868000 | -1.503695000 | H | -1.593371000 | -5.243870000 | -0.385830000 |
| N                | -0.199266000 | -1.693201000 | -0.177507000 | H | -1.241314000 | -1.249630000 | -1.906460000 |
| N                | 2.012761000  | -1.082076000 | 1.221146000  | H | -3.161606000 | -4.348286000 | -2.247161000 |
| C                | 2.403054000  | 2.261007000  | -0.961462000 | H | -1.713006000 | -4.243567000 | -3.259410000 |
| C                | 3.154418000  | 3.439398000  | -1.029296000 | H | -2.740574000 | -2.818527000 | -3.033186000 |
| C                | 3.124203000  | 4.283310000  | 0.083720000  | H | 1.041092000  | -5.109364000 | 1.839236000  |
| C                | 2.383099000  | 3.967152000  | 1.227797000  | H | -0.564540000 | -5.825733000 | 1.651930000  |
| C                | 1.655611000  | 2.783135000  | 1.202120000  | H | -0.310407000 | -4.511082000 | 2.808667000  |
| C                | 2.362059000  | 4.861577000  | 2.435422000  | H | 0.562044000  | -1.626909000 | 2.633569000  |
| C                | 3.962243000  | 3.782399000  | -2.252595000 | H | 1.679098000  | -2.933012000 | 2.238737000  |
| C                | 2.340986000  | 1.253425000  | -2.069552000 | H | 2.379513000  | -2.429218000 | -0.338789000 |
| C                | 3.395689000  | -0.582938000 | -0.753548000 | H | 3.673797000  | -3.342094000 | 1.393078000  |
| C                | 4.526636000  | -0.954329000 | -1.727310000 | H | 4.790107000  | -2.836431000 | 0.157010000  |
| C                | 4.090678000  | -1.950438000 | -2.803076000 | H | 5.589293000  | -2.226071000 | 2.464344000  |
| C                | 2.883303000  | -1.393206000 | -3.560977000 | H | 5.352329000  | -0.775355000 | 1.499929000  |
| C                | 1.750531000  | -1.072309000 | -2.584209000 | H | 4.293644000  | -0.421611000 | 3.714823000  |
| C                | 0.145291000  | -2.594205000 | 0.772471000  | H | 3.383352000  | -1.918202000 | 3.561290000  |
| C                | -0.367340000 | -3.893235000 | 0.742306000  | H | 1.951935000  | 0.057227000  | 2.974701000  |
| C                | -1.195824000 | -4.235209000 | -0.330670000 | H | 3.162657000  | 0.579199000  | 1.808396000  |
| C                | -1.510612000 | -3.321045000 | -1.338041000 | O | -0.654577000 | 0.777048000  | -1.177395000 |
| C                | -1.011159000 | -2.031719000 | -1.193989000 | O | -1.063506000 | 2.982451000  | -1.031773000 |
| C                | -2.332185000 | -3.700609000 | -2.536953000 | H | -0.218738000 | 3.450692000  | -1.041361000 |



|                  |              |              |              |   |              |              |              |
|------------------|--------------|--------------|--------------|---|--------------|--------------|--------------|
| O                | -0.308225000 | 0.513297000  | 1.673054000  | C | -3.793087000 | -1.792193000 | 3.288368000  |
| C                | -1.245720000 | 1.341568000  | 2.100521000  | C | -2.781527000 | -0.772546000 | 3.821328000  |
| O                | -1.682829000 | 2.285762000  | 1.449436000  | C | -1.684898000 | -0.528427000 | 2.786035000  |
| H                | -1.272549000 | 2.766029000  | -0.085086000 | C | 0.478633000  | -2.687547000 | 0.059395000  |
| C                | -1.695089000 | 1.048424000  | 3.508989000  | C | 1.329789000  | -3.758721000 | 0.372810000  |
| H                | -0.906872000 | 1.372161000  | 4.196781000  | C | 2.288957000  | -3.547693000 | 1.364597000  |
| H                | -2.611847000 | 1.594790000  | 3.727807000  | C | 2.386221000  | -2.324538000 | 2.037630000  |
| H                | -1.839273000 | -0.023896000 | 3.653123000  | C | 1.487670000  | -1.329483000 | 1.668238000  |
| C                | -3.471550000 | -2.538608000 | 1.641436000  | C | 3.433983000  | -2.071115000 | 3.086018000  |
| C                | -3.278793000 | -1.340147000 | 0.958769000  | C | 1.224559000  | -5.076700000 | -0.348267000 |
| C                | -3.880876000 | -1.104543000 | -0.286352000 | C | -0.555597000 | -2.761984000 | -1.033969000 |
| C                | -4.710799000 | -2.100593000 | -0.815472000 | C | -2.543861000 | -2.257951000 | 0.339188000  |
| C                | -4.910494000 | -3.305002000 | -0.137143000 | C | -3.463648000 | -3.410742000 | -0.094943000 |
| C                | -4.285163000 | -3.532452000 | 1.090096000  | C | -4.259507000 | -3.093018000 | -1.364098000 |
| H                | -2.978427000 | -2.702840000 | 2.594891000  | C | -3.298812000 | -2.698229000 | -2.490670000 |
| H                | -2.633325000 | -0.583312000 | 1.383389000  | C | -2.421101000 | -1.528608000 | -2.047044000 |
| H                | -5.191410000 | -1.936241000 | -1.776033000 | H | -4.461633000 | 4.174749000  | -1.749861000 |
| H                | -5.548845000 | -4.068493000 | -0.571839000 | H | -1.240231000 | 1.504050000  | -2.688504000 |
| H                | -4.430739000 | -4.472576000 | 1.612833000  | H | -2.658497000 | 4.516656000  | -3.850305000 |
| C                | -3.660329000 | 0.198087000  | -1.019528000 | H | -3.789813000 | 3.251110000  | -4.330643000 |
| H                | -2.590050000 | 0.472695000  | -1.015503000 | H | -2.044952000 | 2.956034000  | -4.423184000 |
| H                | -3.953471000 | 0.071609000  | -2.068838000 | H | -5.407210000 | 2.633890000  | 1.215730000  |
| C                | -4.485358000 | 1.342072000  | -0.403976000 | H | -5.364850000 | 4.216479000  | 0.427845000  |
| H                | -4.114884000 | 1.554895000  | 0.604182000  | H | -4.227062000 | 3.842099000  | 1.729768000  |
| H                | -5.531186000 | 1.030647000  | -0.305530000 | H | -2.009642000 | 1.892788000  | 2.120182000  |
| C                | -4.409140000 | 2.621342000  | -1.262395000 | H | -3.683885000 | 1.346463000  | 2.051577000  |
| H                | -3.367589000 | 2.909703000  | -1.412690000 | H | -3.726219000 | -0.484365000 | 0.080692000  |
| H                | -4.870933000 | 2.438155000  | -2.236634000 | H | -4.924702000 | -0.387031000 | 2.112749000  |
| C                | -5.110393000 | 3.763325000  | -0.577123000 | H | -5.066029000 | -2.019954000 | 1.527462000  |
| O                | -6.436776000 | 3.795761000  | -0.847355000 | H | -4.609973000 | -1.935548000 | 4.001607000  |
| H                | -6.834251000 | 4.523091000  | -0.340741000 | H | -3.304178000 | -2.767337000 | 3.167499000  |
| O                | -4.587916000 | 4.562101000  | 0.174187000  | H | -2.307212000 | -1.130684000 | 4.740246000  |
| <sup>3</sup> IM2 |              |              |              | H | -3.290072000 | 0.165394000  | 4.072847000  |
| Mn               | -0.614392000 | 0.057140000  | -0.027493000 | H | -0.966499000 | 0.226372000  | 3.108867000  |
| N                | -1.956684000 | 1.449204000  | -0.754981000 | H | -1.130208000 | -1.453735000 | 2.627853000  |
| N                | -2.201155000 | -0.081649000 | 1.454365000  | H | 2.972612000  | -4.353035000 | 1.617401000  |
| N                | 0.578577000  | -1.506400000 | 0.695856000  | H | 1.484094000  | -0.351841000 | 2.134975000  |
| N                | -1.656076000 | -1.794968000 | -0.790367000 | H | 4.427781000  | -2.026837000 | 2.627496000  |
| C                | -2.837290000 | 1.910495000  | 0.156286000  | H | 3.450029000  | -2.873780000 | 3.828719000  |
| C                | -3.768238000 | 2.907544000  | -0.164568000 | H | 3.257205000  | -1.124362000 | 3.601021000  |
| C                | -3.752095000 | 3.401163000  | -1.469797000 | H | 0.248679000  | -5.544294000 | -0.178066000 |
| C                | -2.850088000 | 2.918091000  | -2.423960000 | H | 1.994829000  | -5.766805000 | 0.000232000  |
| C                | -1.963098000 | 1.931951000  | -2.008170000 | H | 1.343799000  | -4.951714000 | -1.429214000 |
| C                | -2.830919000 | 3.435979000  | -3.836115000 | H | -0.084807000 | -2.489385000 | -1.982277000 |
| C                | -4.743950000 | 3.428705000  | 0.858030000  | H | -0.935857000 | -3.780070000 | -1.136113000 |
| C                | -2.725061000 | 1.310037000  | 1.532887000  | H | -1.869633000 | -2.645094000 | 1.105038000  |
| C                | -3.259076000 | -1.018933000 | 0.909411000  | H | -2.842847000 | -4.295065000 | -0.274668000 |
| C                | -4.354095000 | -1.307244000 | 1.949004000  | H | -4.119518000 | -3.679201000 | 0.735900000  |

|                  |              |              |              |   |              |              |              |
|------------------|--------------|--------------|--------------|---|--------------|--------------|--------------|
| H                | -4.857109000 | -3.962371000 | -1.653412000 | C | 1.440573000  | -3.995922000 | -0.494915000 |
| H                | -4.964806000 | -2.272890000 | -1.177914000 | C | 2.044768000  | -4.407147000 | 0.696312000  |
| H                | -3.846911000 | -2.392943000 | -3.387373000 | C | 1.842587000  | -3.712807000 | 1.898602000  |
| H                | -2.679506000 | -3.556970000 | -2.775052000 | C | 1.019596000  | -2.591456000 | 1.840050000  |
| H                | -1.688590000 | -1.247891000 | -2.805678000 | C | 2.484186000  | -4.151596000 | 3.185998000  |
| H                | -3.052216000 | -0.656241000 | -1.871176000 | C | 1.667764000  | -4.728126000 | -1.790381000 |
| O                | 0.303213000  | 1.279597000  | 0.949404000  | C | -0.021488000 | -2.280106000 | -1.670615000 |
| O                | 0.430884000  | 3.707627000  | -0.340437000 | C | -2.343030000 | -2.068645000 | -0.834413000 |
| H                | 1.163590000  | 4.230769000  | 0.022721000  | C | -3.075370000 | -2.830450000 | -1.949930000 |
| O                | 0.479740000  | -0.048338000 | -1.733591000 | C | -3.416604000 | -1.942551000 | -3.149748000 |
| C                | 1.179755000  | 0.767005000  | -2.445534000 | C | -2.143256000 | -1.273603000 | -3.676816000 |
| O                | 1.513296000  | 1.917885000  | -2.103540000 | C | -1.443891000 | -0.501366000 | -2.558087000 |
| H                | 0.806261000  | 3.162639000  | -1.065443000 | C | -2.663520000 | 1.889389000  | 0.556916000  |
| C                | 1.636641000  | 0.201797000  | -3.776997000 | C | -3.499421000 | 3.006648000  | 0.416799000  |
| H                | 0.793481000  | -0.255847000 | -4.300561000 | C | -3.135610000 | 3.947630000  | -0.548274000 |
| H                | 2.087532000  | 0.979371000  | -4.393231000 | C | -1.990105000 | 3.787890000  | -1.337647000 |
| H                | 2.375039000  | -0.586381000 | -3.596831000 | C | -1.222279000 | 2.649827000  | -1.104984000 |
| C                | 6.354559000  | -0.912176000 | -1.336262000 | C | -1.612152000 | 4.791644000  | -2.392788000 |
| C                | 5.609206000  | 0.112730000  | -0.791611000 | C | -4.733914000 | 3.183210000  | 1.261308000  |
| C                | 4.195749000  | -0.038533000 | -0.641800000 | C | -2.904448000 | 0.798194000  | 1.567745000  |
| C                | 3.574538000  | -1.255648000 | -1.067176000 | C | -3.203132000 | -1.045093000 | -0.069280000 |
| C                | 4.332484000  | -2.270909000 | -1.613735000 | C | -4.570789000 | -1.558195000 | 0.406680000  |
| C                | 5.719087000  | -2.098595000 | -1.744023000 | C | -4.463279000 | -2.574338000 | 1.546152000  |
| H                | 7.427426000  | -0.809526000 | -1.447675000 | C | -3.669374000 | -1.966207000 | 2.706319000  |
| H                | 6.094979000  | 1.024155000  | -0.466872000 | C | -2.301100000 | -1.488634000 | 2.222152000  |
| H                | 2.501172000  | -1.353891000 | -0.971091000 | H | 2.685768000  | -5.284371000 | 0.687333000  |
| H                | 3.865335000  | -3.193248000 | -1.937555000 | H | 0.815827000  | -1.997956000 | 2.724465000  |
| H                | 6.316238000  | -2.899603000 | -2.167754000 | H | 3.572010000  | -4.206137000 | 3.079793000  |
| C                | 3.385640000  | 0.944258000  | -0.078475000 | H | 2.133474000  | -5.147810000 | 3.474407000  |
| H                | 0.256032000  | 2.196144000  | 0.593632000  | H | 2.252734000  | -3.459258000 | 3.998280000  |
| H                | 2.328353000  | 0.719904000  | 0.049721000  | H | 0.728563000  | -5.122973000 | -2.192394000 |
| C                | 3.771045000  | 2.287244000  | 0.376310000  | H | 2.351578000  | -5.566110000 | -1.644253000 |
| H                | 3.260255000  | 2.964295000  | -0.327162000 | H | 2.097176000  | -4.062396000 | -2.545727000 |
| H                | 4.839013000  | 2.491629000  | 0.306254000  | H | 0.739795000  | -1.727148000 | -2.227454000 |
| C                | 3.232911000  | 2.583237000  | 1.792676000  | H | -0.370349000 | -3.087799000 | -2.317434000 |
| H                | 2.238559000  | 2.134086000  | 1.916662000  | H | -1.965210000 | -2.803530000 | -0.122851000 |
| H                | 3.886612000  | 2.161405000  | 2.556700000  | H | -2.433985000 | -3.653361000 | -2.281942000 |
| C                | 3.052721000  | 4.067389000  | 2.012301000  | H | -3.965735000 | -3.305794000 | -1.532735000 |
| O                | 3.371093000  | 4.447399000  | 3.255169000  | H | -3.888158000 | -2.543791000 | -3.932406000 |
| H                | 3.184099000  | 5.396817000  | 3.353096000  | H | -4.144637000 | -1.173712000 | -2.861382000 |
| O                | 2.630479000  | 4.842365000  | 1.173816000  | H | -2.373426000 | -0.567500000 | -4.480591000 |
| <sup>5</sup> IM2 |              |              |              | H | -1.470564000 | -2.027225000 | -4.102067000 |
| Mn               | -0.451495000 | -0.107983000 | 0.301710000  | H | -0.506315000 | -0.057504000 | -2.896470000 |
| N                | 0.436196000  | -2.180373000 | 0.706406000  | H | -2.088835000 | 0.314062000  | -2.230992000 |
| N                | -1.124042000 | -1.339390000 | -1.356439000 | H | -3.764939000 | 4.821315000  | -0.694527000 |
| N                | -1.560949000 | 1.735045000  | -0.188338000 | H | -0.319085000 | 2.442800000  | -1.667458000 |
| N                | -2.372150000 | -0.510759000 | 1.083249000  | H | -1.387641000 | 5.765841000  | -1.945427000 |
| C                | 0.625687000  | -2.849709000 | -0.433546000 | H | -2.437320000 | 4.943657000  | -3.095261000 |

|   |              |              |              |                  |              |              |              |
|---|--------------|--------------|--------------|------------------|--------------|--------------|--------------|
| H | -0.739623000 | 4.463687000  | -2.962006000 | H                | 3.332259000  | -2.495953000 | -0.129595000 |
| H | -5.451928000 | 2.374082000  | 1.089284000  | O                | 3.359093000  | -1.500446000 | -2.234578000 |
| H | -5.228913000 | 4.126859000  | 1.024901000  | <sup>3</sup> TS3 |              |              |              |
| H | -4.491741000 | 3.184946000  | 2.328706000  | Mn               | -0.389366000 | -0.077038000 | -0.290756000 |
| H | -2.367065000 | 1.038707000  | 2.489713000  | N                | -2.138171000 | 1.052237000  | -0.521280000 |
| H | -3.962710000 | 0.717064000  | 1.815651000  | N                | -1.409056000 | -0.362150000 | 1.648785000  |
| H | -3.381463000 | -0.189374000 | -0.721249000 | N                | 1.140989000  | -1.426727000 | 0.136535000  |
| H | -5.163620000 | -0.701388000 | 0.742595000  | N                | -1.333187000 | -2.063142000 | -0.682801000 |
| H | -5.111112000 | -1.967371000 | -0.449372000 | C                | -2.687685000 | 1.474169000  | 0.634770000  |
| H | -5.464155000 | -2.866587000 | 1.876389000  | C                | -3.794296000 | 2.332835000  | 0.655195000  |
| H | -3.966393000 | -3.488300000 | 1.197198000  | C                | -4.323276000 | 2.723646000  | -0.575012000 |
| H | -3.503705000 | -2.702416000 | 3.498718000  | C                | -3.782941000 | 2.262419000  | -1.779644000 |
| H | -4.231570000 | -1.140401000 | 3.156545000  | C                | -2.679329000 | 1.422507000  | -1.693065000 |
| H | -1.726991000 | -1.003602000 | 3.012448000  | C                | -4.357530000 | 2.653607000  | -3.113638000 |
| H | -1.723025000 | -2.345334000 | 1.878841000  | C                | -4.387923000 | 2.817223000  | 1.952260000  |
| O | 1.082428000  | 0.387041000  | -0.576092000 | C                | -2.035607000 | 0.965323000  | 1.890241000  |
| O | 1.904768000  | 0.886822000  | -3.081794000 | C                | -2.459310000 | -1.431877000 | 1.416541000  |
| H | 2.426575000  | 0.093124000  | -3.265429000 | C                | -3.181236000 | -1.815454000 | 2.717619000  |
| O | 0.114246000  | 0.530757000  | 2.095157000  | C                | -2.220549000 | -2.191460000 | 3.848483000  |
| C | 1.324477000  | 0.755872000  | 2.507967000  | C                | -1.227574000 | -1.048582000 | 4.081622000  |
| O | 2.338018000  | 0.560377000  | 1.815766000  | C                | -0.497766000 | -0.713525000 | 2.781069000  |
| H | 1.550720000  | 0.722532000  | -2.176514000 | C                | 1.022292000  | -2.658323000 | -0.394156000 |
| C | 1.427552000  | 1.293776000  | 3.916783000  | C                | 1.965039000  | -3.660885000 | -0.130329000 |
| H | 0.875473000  | 0.648056000  | 4.604747000  | C                | 3.000017000  | -3.348972000 | 0.753797000  |
| H | 2.469628000  | 1.368980000  | 4.226707000  | C                | 3.094844000  | -2.088855000 | 1.352696000  |
| H | 0.962484000  | 2.283852000  | 3.953871000  | C                | 2.142660000  | -1.144593000 | 0.984674000  |
| C | 2.576116000  | 4.161537000  | 1.872586000  | C                | 4.154282000  | -1.769201000 | 2.371470000  |
| C | 3.321106000  | 3.204950000  | 1.215373000  | C                | 1.855666000  | -5.026947000 | -0.755628000 |
| C | 3.149826000  | 3.017874000  | -0.192882000 | C                | -0.207227000 | -2.868634000 | -1.236583000 |
| C | 2.213300000  | 3.836050000  | -0.901946000 | C                | -1.781685000 | -2.592132000 | 0.661567000  |
| C | 1.466385000  | 4.778918000  | -0.227454000 | C                | -2.612578000 | -3.877580000 | 0.523292000  |
| C | 1.645771000  | 4.935119000  | 1.156634000  | C                | -3.775530000 | -3.739014000 | -0.462071000 |
| H | 2.698963000  | 4.314855000  | 2.938015000  | C                | -3.240301000 | -3.281977000 | -1.822276000 |
| H | 4.031132000  | 2.596310000  | 1.758225000  | C                | -2.457155000 | -1.979259000 | -1.666194000 |
| H | 2.096518000  | 3.686160000  | -1.969844000 | H                | -5.181085000 | 3.390050000  | -0.593800000 |
| H | 0.750801000  | 5.397541000  | -0.754272000 | H                | -2.220051000 | 1.022278000  | -2.583675000 |
| H | 1.054651000  | 5.675136000  | 1.686531000  | H                | -4.337153000 | 3.740574000  | -3.240085000 |
| C | 3.836819000  | 2.050399000  | -0.916239000 | H                | -5.401050000 | 2.333994000  | -3.196689000 |
| H | 1.755881000  | 0.448796000  | 0.138106000  | H                | -3.794992000 | 2.203353000  | -3.934410000 |
| H | 3.625120000  | 2.010628000  | -1.984476000 | H                | -4.789716000 | 1.986172000  | 2.541942000  |
| C | 4.816978000  | 1.080602000  | -0.387080000 | H                | -5.202913000 | 3.517557000  | 1.761170000  |
| H | 4.536561000  | 0.742145000  | 0.615636000  | H                | -3.640391000 | 3.325927000  | 2.568769000  |
| H | 5.748818000  | 1.656479000  | -0.253588000 | H                | -1.237966000 | 1.650432000  | 2.193960000  |
| C | 5.125246000  | -0.103173000 | -1.326196000 | H                | -2.756888000 | 0.923410000  | 2.707646000  |
| H | 5.241762000  | 0.235815000  | -2.356462000 | H                | -3.200005000 | -0.982863000 | 0.753924000  |
| H | 6.067716000  | -0.556296000 | -1.007905000 | H                | -3.791954000 | -0.963473000 | 3.034442000  |
| C | 4.072339000  | -1.190712000 | -1.299821000 | H                | -3.889966000 | -2.619100000 | 2.506282000  |
| O | 4.017986000  | -1.803587000 | -0.108450000 | H                | -2.786580000 | -2.403465000 | 4.760149000  |

|   |              |              |              |                  |              |              |              |
|---|--------------|--------------|--------------|------------------|--------------|--------------|--------------|
| H | -1.673034000 | -3.108559000 | 3.596104000  | H                | 1.910598000  | 1.886169000  | -1.689479000 |
| H | -0.476180000 | -1.325402000 | 4.827498000  | C                | 2.910236000  | 3.251062000  | -0.294231000 |
| H | -1.750175000 | -0.168204000 | 4.472479000  | H                | 2.209032000  | 3.958352000  | -0.732692000 |
| H | 0.192651000  | 0.123174000  | 2.899541000  | H                | 3.916668000  | 3.601347000  | -0.552280000 |
| H | 0.090983000  | -1.577993000 | 2.477301000  | C                | 2.748681000  | 3.274010000  | 1.243690000  |
| H | 3.736418000  | -4.110761000 | 0.993091000  | H                | 2.083636000  | 2.462637000  | 1.558791000  |
| H | 2.152554000  | -0.136244000 | 1.375652000  | H                | 3.695891000  | 3.143106000  | 1.767700000  |
| H | 5.137010000  | -2.114304000 | 2.040075000  | C                | 2.089838000  | 4.552482000  | 1.711948000  |
| H | 3.931651000  | -2.270331000 | 3.319676000  | O                | 2.406979000  | 4.839946000  | 2.983434000  |
| H | 4.212059000  | -0.695729000 | 2.561875000  | H                | 1.916075000  | 5.632884000  | 3.257926000  |
| H | 0.951359000  | -5.546499000 | -0.420721000 | O                | 1.326588000  | 5.236216000  | 1.056997000  |
| H | 2.715237000  | -5.641768000 | -0.482854000 | <sup>5</sup> TS3 |              |              |              |
| H | 1.814103000  | -4.965044000 | -1.847226000 | Mn               | 0.029280000  | 0.235222000  | 0.244861000  |
| H | -0.025172000 | -2.511549000 | -2.253258000 | N                | -2.241921000 | 0.299967000  | 0.765128000  |
| H | -0.467066000 | -3.926750000 | -1.291442000 | N                | -0.884095000 | 1.598076000  | -1.193412000 |
| H | -0.868466000 | -2.855316000 | 1.196494000  | N                | 2.086453000  | 0.619722000  | -0.503807000 |
| H | -1.947525000 | -4.676744000 | 0.178537000  | N                | 0.573059000  | 2.014621000  | 1.236487000  |
| H | -2.955410000 | -4.188824000 | 1.512383000  | C                | -2.958787000 | 0.511206000  | -0.343267000 |
| H | -4.299274000 | -4.694945000 | -0.553615000 | C                | -4.335467000 | 0.228862000  | -0.409433000 |
| H | -4.508085000 | -3.010874000 | -0.090835000 | C                | -4.931584000 | -0.282000000 | 0.745849000  |
| H | -4.056624000 | -3.102963000 | -2.528766000 | C                | -4.194694000 | -0.479278000 | 1.922550000  |
| H | -2.608299000 | -4.063242000 | -2.260119000 | C                | -2.839804000 | -0.166049000 | 1.870879000  |
| H | -2.022704000 | -1.642932000 | -2.608683000 | C                | -4.830901000 | -1.004473000 | 3.179855000  |
| H | -3.136778000 | -1.198188000 | -1.324221000 | C                | -5.121532000 | 0.457879000  | -1.672343000 |
| O | 0.650314000  | 1.326394000  | 0.290277000  | C                | -2.214849000 | 1.036663000  | -1.541914000 |
| O | -0.505181000 | 3.640141000  | -0.559822000 | C                | -1.016365000 | 2.899758000  | -0.418691000 |
| H | 0.064516000  | 4.395076000  | -0.350048000 | C                | -1.530278000 | 4.047283000  | -1.300846000 |
| O | 0.080235000  | -0.055999000 | -2.243156000 | C                | -0.694980000 | 4.244809000  | -2.567531000 |
| C | 0.141810000  | 0.903500000  | -3.112837000 | C                | -0.623201000 | 2.927804000  | -3.344042000 |
| O | 0.148299000  | 2.116799000  | -2.842428000 | C                | -0.088479000 | 1.805047000  | -2.453912000 |
| H | -0.319272000 | 3.339251000  | -1.469799000 | C                | 2.794950000  | 1.342801000  | 0.374063000  |
| C | 0.225913000  | 0.427816000  | -4.550263000 | C                | 4.164624000  | 1.589375000  | 0.195858000  |
| H | 1.046688000  | -0.286155000 | -4.661646000 | C                | 4.755567000  | 1.067659000  | -0.955927000 |
| H | -0.697718000 | -0.099083000 | -4.810420000 | C                | 4.013978000  | 0.344203000  | -1.897923000 |
| H | 0.368979000  | 1.269274000  | -5.227686000 | C                | 2.666509000  | 0.144147000  | -1.613800000 |
| C | 5.679762000  | -0.190967000 | -0.211800000 | C                | 4.638920000  | -0.213649000 | -3.147281000 |
| C | 4.789135000  | 0.862752000  | -0.137310000 | C                | 4.958238000  | 2.386429000  | 1.196639000  |
| C | 3.604251000  | 0.849754000  | -0.925787000 | C                | 2.022965000  | 1.863627000  | 1.560002000  |
| C | 3.349754000  | -0.263873000 | -1.777415000 | C                | 0.336955000  | 3.156093000  | 0.265008000  |
| C | 4.245979000  | -1.315500000 | -1.840393000 | C                | 0.492618000  | 4.525475000  | 0.943675000  |
| C | 5.407506000  | -1.277865000 | -1.059021000 | C                | -0.363618000 | 4.671821000  | 2.202294000  |
| H | 6.586564000  | -0.181865000 | 0.381385000  | C                | -0.032859000 | 3.537648000  | 3.174918000  |
| H | 5.003614000  | 1.706598000  | 0.507035000  | C                | -0.226598000 | 2.180524000  | 2.499930000  |
| H | 2.433885000  | -0.285110000 | -2.353811000 | H                | -5.991618000 | -0.519967000 | 0.732091000  |
| H | 4.048839000  | -2.165020000 | -2.483426000 | H                | -2.209622000 | -0.293349000 | 2.742412000  |
| H | 6.110561000  | -2.103074000 | -1.106790000 | H                | -5.335749000 | -1.956714000 | 2.990888000  |
| C | 2.706857000  | 1.931355000  | -0.958073000 | H                | -5.583691000 | -0.304108000 | 3.555917000  |
| H | 0.215037000  | 2.193295000  | 0.103210000  | H                | -4.086790000 | -1.159934000 | 3.964004000  |

|   |              |              |              |                 |              |              |              |
|---|--------------|--------------|--------------|-----------------|--------------|--------------|--------------|
| H | -5.124254000 | 1.517721000  | -1.949704000 | C               | 4.150753000  | -2.723512000 | 0.301290000  |
| H | -6.157714000 | 0.140693000  | -1.542636000 | C               | 4.049483000  | -3.286513000 | 1.578105000  |
| H | -4.691997000 | -0.103490000 | -2.507662000 | H               | 2.807728000  | -4.358414000 | 2.981485000  |
| H | -2.059690000 | 0.220913000  | -2.252461000 | H               | 0.841238000  | -4.396762000 | 1.492721000  |
| H | -2.823462000 | 1.783505000  | -2.055526000 | H               | 3.127349000  | -2.363118000 | -1.549625000 |
| H | -1.764909000 | 2.714991000  | 0.350668000  | H               | 5.079094000  | -2.268836000 | -0.025066000 |
| H | -2.566824000 | 3.831590000  | -1.578797000 | H               | 4.903341000  | -3.257500000 | 2.247106000  |
| H | -1.575533000 | 4.957436000  | -0.698805000 | C               | 0.734785000  | -3.319320000 | -1.029014000 |
| H | -1.136235000 | 5.033628000  | -3.183364000 | H               | -0.803913000 | -1.890459000 | 0.074221000  |
| H | 0.318812000  | 4.575897000  | -2.308958000 | H               | 0.938144000  | -2.928886000 | -2.021316000 |
| H | 0.049250000  | 3.013301000  | -4.203117000 | C               | -0.448249000 | -4.213463000 | -0.898293000 |
| H | -1.610190000 | 2.669647000  | -3.743673000 | H               | -0.867478000 | -4.179159000 | 0.110515000  |
| H | -0.066322000 | 0.851571000  | -2.980903000 | H               | -0.014860000 | -5.220816000 | -1.000073000 |
| H | 0.932410000  | 2.042434000  | -2.163118000 | C               | -1.537700000 | -4.068435000 | -1.972708000 |
| H | 5.813469000  | 1.242465000  | -1.130835000 | H               | -1.100387000 | -3.944236000 | -2.963769000 |
| H | 2.022049000  | -0.395267000 | -2.299976000 | H               | -2.121245000 | -4.995310000 | -1.986064000 |
| H | 5.347625000  | -1.012105000 | -2.901915000 | C               | -2.535614000 | -2.951622000 | -1.759482000 |
| H | 5.193425000  | 0.560065000  | -3.686044000 | O               | -3.067053000 | -2.967718000 | -0.524972000 |
| H | 3.882402000  | -0.625704000 | -3.819027000 | H               | -3.707433000 | -2.238762000 | -0.441580000 |
| H | 4.589758000  | 3.415916000  | 1.265309000  | O               | -2.865908000 | -2.144702000 | -2.605712000 |
| H | 6.010290000  | 2.425133000  | 0.908811000  | <sup>3</sup> PC |              |              |              |
| H | 4.895161000  | 1.948078000  | 2.197669000  | Mn              | -0.830488000 | -0.219517000 | -0.301822000 |
| H | 2.096144000  | 1.154366000  | 2.388490000  | N               | -1.797407000 | 1.562983000  | -0.422114000 |
| H | 2.434365000  | 2.813782000  | 1.902653000  | N               | -1.747814000 | -0.196923000 | 1.561890000  |
| H | 1.125801000  | 3.073652000  | -0.481324000 | N               | 0.264867000  | -1.886436000 | -0.136762000 |
| H | 1.546916000  | 4.659774000  | 1.206850000  | N               | -2.250356000 | -1.544980000 | -0.845538000 |
| H | 0.273597000  | 5.304137000  | 0.210109000  | C               | -2.164655000 | 2.087368000  | 0.758703000  |
| H | -0.176369000 | 5.644314000  | 2.666133000  | C               | -2.729070000 | 3.368606000  | 0.851961000  |
| H | -1.430532000 | 4.642362000  | 1.947606000  | C               | -2.898308000 | 4.078141000  | -0.333478000 |
| H | -0.686388000 | 3.564040000  | 4.051999000  | C               | -2.523078000 | 3.535856000  | -1.571765000 |
| H | 0.993776000  | 3.642463000  | 3.543104000  | C               | -1.967797000 | 2.262458000  | -1.563280000 |
| H | 0.050827000  | 1.355079000  | 3.153714000  | C               | -2.722812000 | 4.289066000  | -2.858449000 |
| H | -1.276127000 | 2.056338000  | 2.236453000  | C               | -3.117106000 | 3.945562000  | 2.186123000  |
| O | -0.324891000 | -1.432941000 | -0.656747000 | C               | -1.878622000 | 1.238559000  | 1.959859000  |
| O | -0.124431000 | -1.342996000 | -3.418035000 | C               | -3.119345000 | -0.805378000 | 1.324596000  |
| H | -0.940919000 | -1.560473000 | -3.884734000 | C               | -3.879523000 | -1.054576000 | 2.635226000  |
| O | 0.520122000  | -0.654624000 | 1.898629000  | C               | -3.064850000 | -1.841476000 | 3.664221000  |
| C | 0.000153000  | -1.743164000 | 2.399209000  | C               | -1.734964000 | -1.128011000 | 3.920633000  |
| O | -0.829063000 | -2.441620000 | 1.803618000  | C               | -0.969144000 | -0.949474000 | 2.611876000  |
| H | -0.374606000 | -1.358802000 | -2.475729000 | C               | -0.232431000 | -2.938110000 | -0.812395000 |
| C | 0.462989000  | -2.065532000 | 3.799204000  | C               | 0.458358000  | -4.152220000 | -0.885694000 |
| H | -0.033591000 | -1.381241000 | 4.495673000  | C               | 1.692406000  | -4.218702000 | -0.234515000 |
| H | 0.201056000  | -3.090451000 | 4.061145000  | C               | 2.221675000  | -3.122680000 | 0.458512000  |
| H | 1.539177000  | -1.908777000 | 3.890061000  | C               | 1.459240000  | -1.960649000 | 0.477746000  |
| C | 2.862873000  | -3.905565000 | 1.998195000  | C               | 3.555973000  | -3.179855000 | 1.148602000  |
| C | 1.760142000  | -3.932392000 | 1.160585000  | C               | -0.103211000 | -5.324392000 | -1.645111000 |
| C | 1.832547000  | -3.334502000 | -0.122464000 | C               | -1.529563000 | -2.671394000 | -1.517954000 |
| C | 3.054609000  | -2.758498000 | -0.545664000 | C               | -2.901951000 | -2.037393000 | 0.439948000  |

|   |              |              |              |                 |              |              |              |
|---|--------------|--------------|--------------|-----------------|--------------|--------------|--------------|
| C | -4.146777000 | -2.891066000 | 0.157377000  | H               | 1.483603000  | 1.642847000  | 2.034576000  |
| C | -5.145317000 | -2.210610000 | -0.780301000 | C               | 0.988084000  | -0.046544000 | -4.089632000 |
| C | -4.441949000 | -1.818617000 | -2.081788000 | H               | 0.340225000  | 0.717204000  | -4.528551000 |
| C | -3.245891000 | -0.917077000 | -1.783976000 | H               | 2.011345000  | 0.084437000  | -4.439510000 |
| H | -3.333228000 | 5.072699000  | -0.297481000 | H               | 0.607397000  | -1.021276000 | -4.408772000 |
| H | -1.659521000 | 1.763803000  | -2.473407000 | C               | 5.882074000  | -1.163672000 | -0.835848000 |
| H | -2.232631000 | 5.266223000  | -2.815930000 | C               | 4.938839000  | -0.144104000 | -0.709157000 |
| H | -3.788311000 | 4.464127000  | -3.037902000 | C               | 4.789212000  | 0.536442000  | 0.507743000  |
| H | -2.318732000 | 3.736278000  | -3.708960000 | C               | 5.599601000  | 0.174534000  | 1.589703000  |
| H | -3.890282000 | 3.339332000  | 2.670331000  | C               | 6.547306000  | -0.843650000 | 1.463277000  |
| H | -3.505239000 | 4.958466000  | 2.068513000  | C               | 6.691283000  | -1.514522000 | 0.248160000  |
| H | -2.258441000 | 3.984974000  | 2.863927000  | H               | 5.986685000  | -1.684878000 | -1.782713000 |
| H | -0.925083000 | 1.550846000  | 2.404243000  | H               | 4.309055000  | 0.112265000  | -1.554097000 |
| H | -2.653212000 | 1.354554000  | 2.718446000  | H               | 5.488644000  | 0.695075000  | 2.537160000  |
| H | -3.675898000 | -0.059216000 | 0.755504000  | H               | 7.169319000  | -1.111211000 | 2.312004000  |
| H | -4.158798000 | -0.085697000 | 3.060759000  | H               | 7.426073000  | -2.307224000 | 0.146182000  |
| H | -4.823563000 | -1.550360000 | 2.400251000  | C               | 3.765198000  | 1.642953000  | 0.673800000  |
| H | -3.636998000 | -1.933715000 | 4.591300000  | H               | 2.225167000  | 0.808765000  | -0.295946000 |
| H | -2.874634000 | -2.861383000 | 3.307551000  | H               | 3.856800000  | 2.042762000  | 1.688785000  |
| H | -1.099429000 | -1.706734000 | 4.597202000  | C               | 3.943469000  | 2.796243000  | -0.319649000 |
| H | -1.908313000 | -0.158739000 | 4.400804000  | H               | 3.773818000  | 2.439896000  | -1.340719000 |
| H | -0.036185000 | -0.403582000 | 2.758404000  | H               | 4.981574000  | 3.138310000  | -0.268607000 |
| H | -0.723164000 | -1.928931000 | 2.203780000  | C               | 3.028900000  | 3.996612000  | -0.014005000 |
| H | 2.257232000  | -5.145781000 | -0.273945000 | H               | 3.146442000  | 4.315287000  | 1.024076000  |
| H | 1.805108000  | -1.060669000 | 0.973228000  | H               | 3.322989000  | 4.835246000  | -0.655150000 |
| H | 4.339347000  | -3.485826000 | 0.450487000  | C               | 1.555036000  | 3.774294000  | -0.253010000 |
| H | 3.536281000  | -3.907631000 | 1.966273000  | O               | 1.278522000  | 3.427376000  | -1.524440000 |
| H | 3.835001000  | -2.206442000 | 1.555342000  | H               | 0.314572000  | 3.327825000  | -1.607387000 |
| H | -1.072090000 | -5.632324000 | -1.237764000 | O               | 0.672244000  | 3.934909000  | 0.570637000  |
| H | 0.573811000  | -6.178203000 | -1.588447000 | <sup>5</sup> PC |              |              |              |
| H | -0.253433000 | -5.078997000 | -2.701350000 | Mn              | 0.805910000  | -0.136679000 | 0.344303000  |
| H | -1.330685000 | -2.367563000 | -2.548796000 | N               | 1.677204000  | 1.693598000  | 0.404325000  |
| H | -2.157939000 | -3.561610000 | -1.551640000 | N               | 1.775590000  | -0.158386000 | -1.520219000 |
| H | -2.159309000 | -2.681577000 | 0.912582000  | N               | -0.226642000 | -1.896437000 | 0.172187000  |
| H | -3.822933000 | -3.838454000 | -0.284341000 | N               | 2.376093000  | -1.588812000 | 0.898126000  |
| H | -4.603961000 | -3.157760000 | 1.112319000  | C               | 2.086610000  | 2.171660000  | -0.784918000 |
| H | -5.978276000 | -2.889227000 | -0.982488000 | C               | 2.648121000  | 3.451319000  | -0.898955000 |
| H | -5.571180000 | -1.317699000 | -0.306499000 | C               | 2.776110000  | 4.196683000  | 0.270862000  |
| H | -5.113093000 | -1.263956000 | -2.743869000 | C               | 2.368129000  | 3.694465000  | 1.515940000  |
| H | -4.125107000 | -2.713070000 | -2.629191000 | C               | 1.813281000  | 2.422048000  | 1.532188000  |
| H | -2.693700000 | -0.645697000 | -2.683426000 | C               | 2.529808000  | 4.490916000  | 2.781301000  |
| H | -3.596212000 | 0.002977000  | -1.318764000 | C               | 3.082126000  | 3.989516000  | -2.235367000 |
| O | 2.417439000  | 1.132337000  | 0.611782000  | C               | 1.848874000  | 1.273321000  | -1.957417000 |
| O | 1.052876000  | 2.137753000  | 2.760358000  | C               | 3.172375000  | -0.715175000 | -1.253774000 |
| H | 0.881389000  | 2.996749000  | 2.344850000  | C               | 3.956951000  | -0.901085000 | -2.561215000 |
| O | -0.284967000 | -0.039243000 | -2.096100000 | C               | 3.201505000  | -1.738664000 | -3.595769000 |
| C | 0.931806000  | 0.044586000  | -2.585897000 | C               | 1.827753000  | -1.117719000 | -3.864135000 |
| O | 1.937923000  | 0.184025000  | -1.892610000 | C               | 1.043165000  | -0.966215000 | -2.561927000 |

|   |              |              |              |                                                                       |              |              |              |
|---|--------------|--------------|--------------|-----------------------------------------------------------------------|--------------|--------------|--------------|
| C | 0.329008000  | -2.957684000 | 0.788053000  | H                                                                     | 4.324795000  | -2.726341000 | 2.617747000  |
| C | -0.316586000 | -4.201422000 | 0.794324000  | H                                                                     | 2.773884000  | -0.762349000 | 2.776857000  |
| C | -1.549053000 | -4.288106000 | 0.143926000  | H                                                                     | 3.621686000  | 0.013148000  | 1.449435000  |
| C | -2.129116000 | -3.183364000 | -0.490606000 | O                                                                     | -2.465900000 | 1.093469000  | -0.580959000 |
| C | -1.419529000 | -1.989857000 | -0.445397000 | O                                                                     | -1.081997000 | 2.107088000  | -2.714970000 |
| C | -3.456217000 | -3.267027000 | -1.191146000 | H                                                                     | -0.952975000 | 2.978655000  | -2.309933000 |
| C | 0.291777000  | -5.394059000 | 1.483627000  | O                                                                     | 0.279815000  | 0.007883000  | 2.156660000  |
| C | 1.637475000  | -2.718911000 | 1.502934000  | C                                                                     | -0.941461000 | 0.054090000  | 2.646182000  |
| C | 3.023951000  | -1.988287000 | -0.398012000 | O                                                                     | -1.946629000 | 0.173133000  | 1.949772000  |
| C | 4.315155000  | -2.790515000 | -0.168576000 | H                                                                     | -1.510539000 | 1.607711000  | -1.991142000 |
| C | 5.290896000  | -2.093290000 | 0.783194000  | C                                                                     | -0.995584000 | -0.057154000 | 4.148471000  |
| C | 4.586944000  | -1.790719000 | 2.109741000  | H                                                                     | -0.381133000 | 0.728266000  | 4.597040000  |
| C | 3.331718000  | -0.957545000 | 1.859723000  | H                                                                     | -2.024262000 | 0.027527000  | 4.496623000  |
| H | 3.209667000  | 5.191030000  | 0.216833000  | H                                                                     | -0.574436000 | -1.018645000 | 4.456102000  |
| H | 1.479076000  | 1.946893000  | 2.446006000  | C                                                                     | -5.809777000 | -1.369212000 | 0.846499000  |
| H | 2.026320000  | 5.458423000  | 2.695451000  | C                                                                     | -4.909813000 | -0.314150000 | 0.697299000  |
| H | 3.588551000  | 4.687622000  | 2.976825000  | C                                                                     | -4.806171000 | 0.360979000  | -0.527315000 |
| H | 2.114964000  | 3.960279000  | 3.640559000  | C                                                                     | -5.618448000 | -0.041152000 | -1.593533000 |
| H | 3.882770000  | 3.378865000  | -2.666224000 | C                                                                     | -6.523795000 | -1.094126000 | -1.443853000 |
| H | 3.451522000  | 5.011248000  | -2.135871000 | C                                                                     | -6.621781000 | -1.760186000 | -0.221597000 |
| H | 2.251276000  | 3.994033000  | -2.947719000 | H                                                                     | -5.878400000 | -1.886864000 | 1.798555000  |
| H | 0.883710000  | 1.534029000  | -2.411968000 | H                                                                     | -4.279376000 | -0.025151000 | 1.531342000  |
| H | 2.620954000  | 1.401537000  | -2.715450000 | H                                                                     | -5.542014000 | 0.474644000  | -2.546940000 |
| H | 3.680416000  | 0.049250000  | -0.662681000 | H                                                                     | -7.147376000 | -1.393480000 | -2.280702000 |
| H | 4.178403000  | 0.084400000  | -2.981829000 | H                                                                     | -7.322528000 | -2.580748000 | -0.102044000 |
| H | 4.928499000  | -1.336818000 | -2.320840000 | C                                                                     | -3.838825000 | 1.513554000  | -0.714121000 |
| H | 3.783355000  | -1.793177000 | -4.519885000 | H                                                                     | -2.277275000 | 0.813857000  | 0.340649000  |
| H | 3.078472000  | -2.768716000 | -3.239244000 | H                                                                     | -3.914760000 | 1.857395000  | -1.750580000 |
| H | 1.234025000  | -1.747449000 | -4.533183000 | C                                                                     | -4.124293000 | 2.701063000  | 0.211609000  |
| H | 1.938442000  | -0.147396000 | -4.360185000 | H                                                                     | -3.994348000 | 2.400312000  | 1.256321000  |
| H | 0.083468000  | -0.473081000 | -2.722866000 | H                                                                     | -5.173172000 | 2.988020000  | 0.090334000  |
| H | 0.845522000  | -1.950771000 | -2.141110000 | C                                                                     | -3.249427000 | 3.927510000  | -0.105806000 |
| H | -2.070407000 | -5.241070000 | 0.132987000  | H                                                                     | -3.322389000 | 4.190266000  | -1.163493000 |
| H | -1.803379000 | -1.081569000 | -0.895976000 | H                                                                     | -3.614716000 | 4.781943000  | 0.475149000  |
| H | -4.229475000 | -3.635031000 | -0.511926000 | C                                                                     | -1.783576000 | 3.784161000  | 0.224687000  |
| H | -3.400881000 | -3.958814000 | -2.037903000 | O                                                                     | -1.569892000 | 3.483322000  | 1.519848000  |
| H | -3.773950000 | -2.290395000 | -1.559376000 | H                                                                     | -0.610240000 | 3.431618000  | 1.662968000  |
| H | 1.264818000  | -5.649303000 | 1.050873000  | O                                                                     | -0.860538000 | 3.965748000  | -0.549078000 |
| H | -0.359481000 | -6.264119000 | 1.386163000  | <b>Part IV Alcohol oxidation of 4-OH-PBA by the</b>                   |              |              |              |
| H | 0.446093000  | -5.202828000 | 2.550287000  | <b>Mn<sup>IV</sup>(O)(AcO•) species 2 via the gem-diol mechanism.</b> |              |              |              |
| H | 1.426414000  | -2.463424000 | 2.545917000  | <sup>3</sup> RC                                                       |              |              |              |
| H | 2.236207000  | -3.632245000 | 1.510818000  | Mn                                                                    | 0.835080000  | 0.121887000  | -0.338841000 |
| H | 2.313206000  | -2.651506000 | -0.894685000 | N                                                                     | -0.892500000 | -1.012141000 | -0.467901000 |
| H | 4.034693000  | -3.759601000 | 0.258101000  | N                                                                     | 0.839340000  | -0.961678000 | 1.593128000  |
| H | 4.778634000  | -3.016987000 | -1.130821000 | N                                                                     | 2.731690000  | 0.969458000  | -0.206391000 |
| H | 6.163525000  | -2.731774000 | 0.947172000  | N                                                                     | 2.257411000  | -1.626320000 | -0.848576000 |
| H | 5.661459000  | -1.160494000 | 0.339267000  | C                                                                     | -1.374508000 | -1.497928000 | 0.697741000  |
| H | 5.240673000  | -1.232691000 | 2.786777000  | C                                                                     | -2.498436000 | -2.328892000 | 0.722196000  |

|   |              |              |              |                 |              |              |              |
|---|--------------|--------------|--------------|-----------------|--------------|--------------|--------------|
| C | -3.094658000 | -2.635241000 | -0.502544000 | H               | 6.368373000  | -0.814251000 | -1.084419000 |
| C | -2.605062000 | -2.122452000 | -1.707454000 | H               | 7.085738000  | 0.756697000  | -1.463137000 |
| C | -1.488726000 | -1.296520000 | -1.638881000 | H               | 5.951814000  | 0.004946000  | -2.593809000 |
| C | -3.239533000 | -2.454529000 | -3.027928000 | H               | 3.053849000  | -0.710648000 | -2.557395000 |
| C | -3.034867000 | -2.882195000 | 2.015191000  | H               | 4.249895000  | -1.602721000 | -1.623562000 |
| C | -0.616559000 | -1.074397000 | 1.922155000  | H               | 3.337389000  | -1.427165000 | 0.933957000  |
| C | 1.439788000  | -2.340235000 | 1.360653000  | H               | 4.489158000  | -3.180235000 | -0.143220000 |
| C | 1.646622000  | -3.078936000 | 2.694477000  | H               | 3.788093000  | -3.859003000 | 1.296490000  |
| C | 2.440169000  | -2.265042000 | 3.717646000  | H               | 3.514547000  | -5.371660000 | -0.696210000 |
| C | 1.743441000  | -0.923215000 | 3.954316000  | H               | 1.941314000  | -4.889734000 | -0.078770000 |
| C | 1.579852000  | -0.170753000 | 2.633930000  | H               | 1.931322000  | -4.608716000 | -2.541676000 |
| C | 3.743726000  | 0.329364000  | -0.831298000 | H               | 3.403580000  | -3.649437000 | -2.477218000 |
| C | 5.036414000  | 0.867086000  | -0.837133000 | H               | 1.391147000  | -2.166644000 | -2.676202000 |
| C | 5.229497000  | 2.081542000  | -0.175429000 | H               | 0.677893000  | -2.950549000 | -1.274338000 |
| C | 4.179367000  | 2.747643000  | 0.465604000  | O               | 0.099975000  | 1.502546000  | 0.287087000  |
| C | 2.927305000  | 2.146614000  | 0.415778000  | O               | 0.717439000  | 0.661516000  | -2.146694000 |
| C | 4.382757000  | 4.055662000  | 1.178773000  | C               | 0.281343000  | 1.868290000  | -2.454800000 |
| C | 6.172020000  | 0.164742000  | -1.534071000 | O               | -0.114011000 | 2.673975000  | -1.609777000 |
| C | 3.382688000  | -0.946557000 | -1.540325000 | C               | 0.294688000  | 2.189876000  | -3.924340000 |
| C | 2.694672000  | -2.186244000 | 0.485586000  | H               | -0.079191000 | 3.197660000  | -4.095994000 |
| C | 3.534391000  | -3.462539000 | 0.311476000  | H               | 1.318885000  | 2.093728000  | -4.293927000 |
| C | 2.849545000  | -4.513511000 | -0.566243000 | H               | -0.326216000 | 1.459193000  | -4.449482000 |
| C | 2.491822000  | -3.901033000 | -1.923938000 | O               | -2.473391000 | 1.882812000  | 1.171728000  |
| C | 1.624240000  | -2.657659000 | -1.729642000 | C               | -5.652921000 | -0.839214000 | 1.147102000  |
| H | -3.966942000 | -3.279682000 | -0.514524000 | C               | -4.677119000 | 0.159450000  | 1.161483000  |
| H | -1.042908000 | -0.862521000 | -2.524031000 | C               | -4.265293000 | 0.763854000  | -0.030016000 |
| H | -4.314590000 | -2.262770000 | -2.990385000 | C               | -4.848976000 | 0.357213000  | -1.236227000 |
| H | -3.098422000 | -3.514220000 | -3.263612000 | C               | -5.829156000 | -0.634933000 | -1.251884000 |
| H | -2.807962000 | -1.862991000 | -3.837587000 | C               | -6.230180000 | -1.241709000 | -0.058637000 |
| H | -2.322158000 | -3.576787000 | 2.472382000  | H               | -5.959850000 | -1.305334000 | 2.078398000  |
| H | -3.966126000 | -3.421060000 | 1.837459000  | H               | -4.219802000 | 0.467862000  | 2.094721000  |
| H | -3.239395000 | -2.085680000 | 2.735008000  | H               | -4.529606000 | 0.815602000  | -2.168659000 |
| H | -0.969511000 | -0.093063000 | 2.252239000  | H               | -6.277208000 | -0.937186000 | -2.193662000 |
| H | -0.764035000 | -1.772858000 | 2.745019000  | H               | -6.987575000 | -2.019331000 | -0.069620000 |
| H | 0.688883000  | -2.890084000 | 0.793349000  | C               | -3.248642000 | 1.887839000  | -0.032609000 |
| H | 0.664086000  | -3.320804000 | 3.110894000  | H               | -1.537367000 | 1.848449000  | 0.913914000  |
| H | 2.117571000  | -4.040860000 | 2.484572000  | H               | -2.575681000 | 1.751249000  | -0.888556000 |
| H | 2.515660000  | -2.826676000 | 4.652627000  | C               | -3.944081000 | 3.250076000  | -0.183073000 |
| H | 3.465459000  | -2.095019000 | 3.366770000  | H               | -4.665324000 | 3.373462000  | 0.630665000  |
| H | 2.326588000  | -0.284026000 | 4.623374000  | H               | -4.510274000 | 3.252445000  | -1.119520000 |
| H | 0.769545000  | -1.077674000 | 4.431384000  | C               | -2.951726000 | 4.422371000  | -0.199940000 |
| H | 1.041193000  | 0.769691000  | 2.758768000  | H               | -2.152408000 | 4.247957000  | -0.923472000 |
| H | 2.564255000  | 0.061646000  | 2.228562000  | H               | -3.482580000 | 5.334126000  | -0.498109000 |
| H | 6.223516000  | 2.518823000  | -0.160600000 | C               | -2.302181000 | 4.722136000  | 1.130158000  |
| H | 2.052176000  | 2.594274000  | 0.869264000  | O               | -3.209026000 | 4.914524000  | 2.115690000  |
| H | 4.789065000  | 4.807662000  | 0.495740000  | H               | -2.726445000 | 5.120547000  | 2.932290000  |
| H | 5.096238000  | 3.937786000  | 2.000326000  | O               | -1.109955000 | 4.851477000  | 1.322657000  |
| H | 3.444799000  | 4.433723000  | 1.589932000  | <sup>5</sup> RC |              |              |              |



|    |              |              |              |   |              |              |              |
|----|--------------|--------------|--------------|---|--------------|--------------|--------------|
| Mn | -0.613594000 | 0.187445000  | -0.030726000 | H | -1.083106000 | -0.722201000 | -3.014619000 |
| N  | 0.826247000  | -1.193272000 | 0.621966000  | H | -2.648502000 | -0.635576000 | -2.222810000 |
| N  | -1.160085000 | -1.650524000 | -1.142149000 | H | -5.040384000 | 3.660911000  | -1.637262000 |
| N  | -2.162445000 | 1.348108000  | -0.645552000 | H | -1.149918000 | 1.958582000  | -2.326406000 |
| N  | -2.374419000 | -0.593474000 | 1.226744000  | H | -3.053657000 | 4.796067000  | -3.241403000 |
| C  | 0.993142000  | -2.281376000 | -0.146599000 | H | -3.782223000 | 3.466655000  | -4.144069000 |
| C  | 1.961244000  | -3.273023000 | 0.177416000  | H | -2.022366000 | 3.539568000  | -3.947760000 |
| C  | 2.801051000  | -3.014589000 | 1.264517000  | H | -6.041375000 | 1.400707000  | 0.798205000  |
| C  | 2.694061000  | -1.835263000 | 1.998874000  | H | -6.245696000 | 3.086656000  | 0.303968000  |
| C  | 1.648384000  | -0.951153000 | 1.649699000  | H | -5.264630000 | 2.689817000  | 1.721660000  |
| C  | 3.566202000  | -1.532177000 | 3.179648000  | H | -2.747284000 | 1.215221000  | 2.213817000  |
| C  | 2.011111000  | -4.584211000 | -0.554170000 | H | -4.214885000 | 0.367344000  | 1.748463000  |
| C  | 0.131818000  | -2.338268000 | -1.373839000 | H | -3.597676000 | -1.036702000 | -0.405045000 |
| C  | -2.047945000 | -2.512258000 | -0.263937000 | H | -4.986819000 | -1.612224000 | 1.415080000  |
| C  | -2.602999000 | -3.719863000 | -1.037209000 | H | -4.666191000 | -3.088296000 | 0.550178000  |
| C  | -3.294444000 | -3.323692000 | -2.344235000 | H | -4.499400000 | -3.397041000 | 3.041653000  |
| C  | -2.329319000 | -2.514191000 | -3.215863000 | H | -2.949430000 | -3.734581000 | 2.284068000  |
| C  | -1.813671000 | -1.299631000 | -2.445967000 | H | -2.561924000 | -2.258929000 | 4.241365000  |
| C  | -3.245600000 | 1.431069000  | 0.153628000  | H | -3.757307000 | -1.109191000 | 3.654694000  |
| C  | -4.320062000 | 2.267487000  | -0.176107000 | H | -1.442693000 | -0.333735000 | 3.077027000  |
| C  | -4.220202000 | 3.006440000  | -1.355806000 | H | -1.117174000 | -1.879043000 | 2.312072000  |
| C  | -3.092248000 | 2.926113000  | -2.180165000 | O | 0.463479000  | 0.738959000  | -1.193956000 |
| C  | -2.072058000 | 2.076742000  | -1.771739000 | O | -0.254813000 | 1.306215000  | 1.444775000  |
| C  | -2.976332000 | 3.724463000  | -3.449771000 | C | -0.082344000 | 2.609630000  | 1.525809000  |
| C  | -5.533412000 | 2.367089000  | 0.711108000  | O | -0.283353000 | 3.390244000  | 0.597928000  |
| C  | -3.204050000 | 0.616808000  | 1.420051000  | C | 0.402058000  | 3.057012000  | 2.883830000  |
| C  | -3.102891000 | -1.604552000 | 0.385392000  | H | 0.066330000  | 4.075042000  | 3.083855000  |
| C  | -4.196124000 | -2.333955000 | 1.184369000  | H | 0.069018000  | 2.377065000  | 3.668868000  |
| C  | -3.673712000 | -2.936302000 | 2.491798000  | H | 1.495844000  | 3.056279000  | 2.852412000  |
| C  | -3.008020000 | -1.842190000 | 3.333148000  | O | 2.521302000  | 1.528051000  | 0.471337000  |
| C  | -1.905785000 | -1.155031000 | 2.528229000  | C | 3.661045000  | -1.909346000 | -1.897373000 |
| H  | 3.554729000  | -3.746521000 | 1.534054000  | C | 3.363968000  | -0.626478000 | -1.450105000 |
| H  | 1.448240000  | -0.049206000 | 2.212384000  | C | 4.141106000  | -0.049956000 | -0.444573000 |
| H  | 4.507658000  | -2.080968000 | 3.124601000  | C | 5.253171000  | -0.776309000 | 0.076220000  |
| H  | 3.055384000  | -1.827715000 | 4.103592000  | C | 5.553117000  | -2.064289000 | -0.371228000 |
| H  | 3.777386000  | -0.462604000 | 3.250429000  | C | 4.765215000  | -2.635295000 | -1.359606000 |
| H  | 1.129028000  | -5.182085000 | -0.296785000 | H | 3.072104000  | -2.359864000 | -2.688821000 |
| H  | 2.897562000  | -5.149751000 | -0.265684000 | H | 2.509632000  | -0.094023000 | -1.855057000 |
| H  | 2.015954000  | -4.464164000 | -1.639270000 | H | 5.869432000  | -0.311167000 | 0.839008000  |
| H  | 0.650935000  | -1.798987000 | -2.172647000 | H | 6.395024000  | -2.603435000 | 0.046222000  |
| H  | -0.013278000 | -3.363742000 | -1.712731000 | H | 4.982175000  | -3.628797000 | -1.735166000 |
| H  | -1.396249000 | -2.894974000 | 0.524030000  | C | 3.860243000  | 1.346726000  | 0.055698000  |
| H  | -1.777368000 | -4.403656000 | -1.259239000 | H | 1.874223000  | 1.343163000  | -0.251901000 |
| H  | -3.271783000 | -4.279365000 | -0.380470000 | H | 4.468754000  | 1.533039000  | 0.946195000  |
| H  | -3.627766000 | -4.221737000 | -2.871751000 | C | 4.260436000  | 2.373715000  | -1.039444000 |
| H  | -4.191682000 | -2.727463000 | -2.136333000 | H | 3.578622000  | 2.252380000  | -1.887070000 |
| H  | -2.824760000 | -2.150985000 | -4.121163000 | H | 5.268261000  | 2.143441000  | -1.396205000 |
| H  | -1.496054000 | -3.145576000 | -3.544528000 | C | 4.238078000  | 3.822848000  | -0.529871000 |

|                  |              |              |              |   |              |              |              |
|------------------|--------------|--------------|--------------|---|--------------|--------------|--------------|
| H                | 4.997708000  | 3.973988000  | 0.239799000  | H | 0.893757000  | -1.728296000 | 2.292066000  |
| H                | 4.473763000  | 4.486112000  | -1.369932000 | H | 0.849927000  | -0.578240000 | 4.353057000  |
| C                | 2.907298000  | 4.250648000  | 0.049167000  | H | 2.419695000  | -1.314182000 | 4.225068000  |
| O                | 1.896082000  | 4.128649000  | -0.826599000 | H | 2.541682000  | 1.046925000  | 5.090112000  |
| H                | 1.045052000  | 4.130054000  | -0.327705000 | H | 3.417821000  | 0.907514000  | 3.572101000  |
| O                | 2.760149000  | 4.678908000  | 1.177277000  | H | 1.972914000  | 2.921558000  | 3.457253000  |
| <sup>3</sup> TS1 |              |              |              | H | 0.560709000  | 1.981965000  | 3.918144000  |
| Mn               | 0.614581000  | -0.160344000 | -0.513199000 | H | 0.608152000  | 2.347717000  | 1.454892000  |
| N                | -0.917221000 | -1.313615000 | 0.235439000  | H | 2.245476000  | 1.683494000  | 1.381679000  |
| N                | 0.718691000  | 0.262604000  | 1.669408000  | H | 5.516921000  | 2.608722000  | -2.244227000 |
| N                | 2.331863000  | 0.859330000  | -1.061900000 | H | 1.344819000  | 2.664438000  | -1.221367000 |
| N                | 2.319074000  | -1.579613000 | 0.119770000  | H | 3.681625000  | 4.526648000  | -3.100745000 |
| C                | -1.396152000 | -0.963513000 | 1.449648000  | H | 4.073982000  | 4.878187000  | -1.416390000 |
| C                | -2.487937000 | -1.632847000 | 2.009632000  | H | 2.379453000  | 4.732574000  | -1.915308000 |
| C                | -3.045782000 | -2.677818000 | 1.270259000  | H | 6.233449000  | -0.499749000 | -0.854823000 |
| C                | -2.542491000 | -3.048646000 | 0.019878000  | H | 6.726594000  | 0.590483000  | -2.156923000 |
| C                | -1.470650000 | -2.313741000 | -0.472596000 | H | 5.786895000  | -0.862633000 | -2.524907000 |
| C                | -3.117409000 | -4.193118000 | -0.766054000 | H | 3.051179000  | -1.856222000 | -1.823172000 |
| C                | -3.052992000 | -1.218290000 | 3.340367000  | H | 4.322020000  | -1.739672000 | -0.609807000 |
| C                | -0.703793000 | 0.189953000  | 2.116545000  | H | 3.286350000  | -0.152123000 | 1.304830000  |
| C                | 1.529667000  | -0.842919000 | 2.326926000  | H | 4.727098000  | -2.008748000 | 1.497054000  |
| C                | 1.797078000  | -0.520555000 | 3.808025000  | H | 4.081470000  | -1.715318000 | 3.085569000  |
| C                | 2.417369000  | 0.861527000  | 4.019645000  | H | 4.111600000  | -4.165476000 | 2.512990000  |
| C                | 1.519016000  | 1.928518000  | 3.390036000  | H | 2.461305000  | -3.626468000 | 2.787096000  |
| C                | 1.292984000  | 1.630407000  | 1.907992000  | H | 2.506040000  | -4.969801000 | 0.704745000  |
| C                | 3.465072000  | 0.138394000  | -1.203107000 | H | 3.816339000  | -3.992890000 | 0.056483000  |
| C                | 4.650841000  | 0.744857000  | -1.635537000 | H | 1.618178000  | -3.262539000 | -0.904793000 |
| C                | 4.609890000  | 2.113023000  | -1.910701000 | H | 0.971456000  | -3.078207000 | 0.718427000  |
| C                | 3.434067000  | 2.858119000  | -1.769608000 | O | -0.382179000 | 1.121599000  | -0.939505000 |
| C                | 2.301759000  | 2.174810000  | -1.343876000 | O | 0.590197000  | -1.042775000 | -2.164778000 |
| C                | 3.383598000  | 4.331518000  | -2.066144000 | C | 0.277493000  | -0.445400000 | -3.317564000 |
| C                | 5.918448000  | -0.051144000 | -1.802594000 | O | 0.045947000  | 0.748773000  | -3.412206000 |
| C                | 3.356145000  | -1.332890000 | -0.912000000 | C | 0.225041000  | -1.409860000 | -4.476146000 |
| C                | 2.781026000  | -1.104272000 | 1.475280000  | H | 0.102027000  | -0.864952000 | -5.411062000 |
| C                | 3.808559000  | -2.069684000 | 2.089671000  | H | 1.134955000  | -2.013542000 | -4.499448000 |
| C                | 3.322489000  | -3.521335000 | 2.115258000  | H | -0.623045000 | -2.085342000 | -4.327230000 |
| C                | 2.930706000  | -3.961618000 | 0.701123000  | O | -3.402630000 | 1.496416000  | 1.257879000  |
| C                | 1.882920000  | -3.010528000 | 0.123487000  | C | -5.476084000 | -1.390196000 | -1.028948000 |
| H                | -3.897381000 | -3.212903000 | 1.679243000  | C | -4.870649000 | -0.353497000 | -0.317763000 |
| H                | -1.029488000 | -2.515797000 | -1.439199000 | C | -3.801061000 | 0.354769000  | -0.875460000 |
| H                | -4.207064000 | -4.200083000 | -0.695533000 | C | -3.327684000 | -0.009966000 | -2.147471000 |
| H                | -2.747869000 | -5.147132000 | -0.374500000 | C | -3.923917000 | -1.053421000 | -2.851282000 |
| H                | -2.840811000 | -4.126984000 | -1.819988000 | C | -5.006005000 | -1.743298000 | -2.295796000 |
| H                | -2.306350000 | -1.303306000 | 4.136875000  | H | -6.310494000 | -1.927942000 | -0.589567000 |
| H                | -3.903481000 | -1.847738000 | 3.606979000  | H | -5.222162000 | -0.099479000 | 0.675730000  |
| H                | -3.389087000 | -0.178169000 | 3.301419000  | H | -2.482326000 | 0.519191000  | -2.576085000 |
| H                | -1.200730000 | 1.128590000  | 1.861101000  | H | -3.544892000 | -1.329824000 | -3.830262000 |
| H                | -0.752964000 | 0.093882000  | 3.201176000  | H | -5.472576000 | -2.556351000 | -2.842698000 |

|                  |              |              |              |   |              |              |              |
|------------------|--------------|--------------|--------------|---|--------------|--------------|--------------|
| C                | -3.111427000 | 1.477901000  | -0.138385000 | H | -2.714384000 | -5.070171000 | -0.841946000 |
| H                | -4.212267000 | 1.998200000  | 1.416333000  | H | -2.874682000 | -3.918954000 | -2.178462000 |
| H                | -2.022599000 | 1.269890000  | -0.210834000 | H | -2.245177000 | -1.653742000 | 4.000712000  |
| C                | -3.311669000 | 2.860202000  | -0.774128000 | H | -3.847134000 | -2.163106000 | 3.450569000  |
| H                | -4.329323000 | 3.209712000  | -0.561420000 | H | -3.354216000 | -0.466639000 | 3.292878000  |
| H                | -3.231056000 | 2.769376000  | -1.860141000 | H | -1.171884000 | 0.998347000  | 1.914811000  |
| C                | -2.265786000 | 3.886636000  | -0.303714000 | H | -0.742472000 | -0.138629000 | 3.174437000  |
| H                | -1.270921000 | 3.581218000  | -0.631798000 | H | 0.882020000  | -1.907118000 | 2.111630000  |
| H                | -2.491730000 | 4.859359000  | -0.752900000 | H | 0.854921000  | -0.938919000 | 4.261811000  |
| C                | -2.203208000 | 4.076618000  | 1.192644000  | H | 2.415109000  | -1.682085000 | 4.073306000  |
| O                | -3.368931000 | 4.532998000  | 1.703138000  | H | 2.570041000  | 0.593755000  | 5.134963000  |
| H                | -3.265665000 | 4.632477000  | 2.663764000  | H | 3.442217000  | 0.575116000  | 3.608372000  |
| O                | -1.227130000 | 3.875923000  | 1.886299000  | H | 2.024455000  | 2.609915000  | 3.673398000  |
| <sup>5</sup> TS1 |              |              |              | H | 0.599956000  | 1.652871000  | 4.052199000  |
| Mn               | 0.645223000  | -0.118825000 | -0.546580000 | H | 0.649339000  | 2.224999000  | 1.625871000  |
| N                | -0.917893000 | -1.296479000 | 0.095986000  | H | 2.279053000  | 1.552353000  | 1.496164000  |
| N                | 0.736355000  | 0.132226000  | 1.661637000  | H | 5.609591000  | 2.693144000  | -2.017003000 |
| N                | 2.379040000  | 0.912039000  | -1.019695000 | H | 1.428819000  | 2.740811000  | -1.015723000 |
| N                | 2.315829000  | -1.617118000 | -0.041013000 | H | 3.822492000  | 4.720230000  | -2.706447000 |
| C                | -1.384769000 | -1.057830000 | 1.343265000  | H | 4.208690000  | 4.908161000  | -0.994792000 |
| C                | -2.463412000 | -1.783971000 | 1.856085000  | H | 2.515504000  | 4.845172000  | -1.515034000 |
| C                | -3.025371000 | -2.763848000 | 1.034207000  | H | 6.264403000  | -0.522519000 | -0.901759000 |
| C                | -2.540680000 | -3.015171000 | -0.252219000 | H | 6.772560000  | 0.649699000  | -2.124120000 |
| C                | -1.479870000 | -2.231299000 | -0.691396000 | H | 5.808715000  | -0.757975000 | -2.592492000 |
| C                | -3.116607000 | -4.092202000 | -1.128192000 | H | 3.035564000  | -1.742108000 | -2.004560000 |
| C                | -3.007704000 | -1.501828000 | 3.229551000  | H | 4.312745000  | -1.760242000 | -0.793011000 |
| C                | -0.688109000 | 0.036761000  | 2.100008000  | H | 3.298654000  | -0.295675000 | 1.251847000  |
| C                | 1.532207000  | -1.038385000 | 2.221425000  | H | 4.711873000  | -2.185320000 | 1.295713000  |
| C                | 1.803736000  | -0.847918000 | 3.724054000  | H | 4.074768000  | -2.002205000 | 2.904097000  |
| C                | 2.441695000  | 0.503288000  | 4.052765000  | H | 4.064707000  | -4.401985000 | 2.150052000  |
| C                | 1.556975000  | 1.632932000  | 3.519518000  | H | 2.422732000  | -3.860278000 | 2.465354000  |
| C                | 1.326251000  | 1.465848000  | 2.018174000  | H | 2.446372000  | -5.043673000 | 0.288607000  |
| C                | 3.499598000  | 0.183718000  | -1.217099000 | H | 3.773642000  | -4.043762000 | -0.285626000 |
| C                | 4.700988000  | 0.800335000  | -1.585748000 | H | 1.589732000  | -3.207690000 | -1.190317000 |
| C                | 4.689648000  | 2.188631000  | -1.736128000 | H | 0.943027000  | -3.134222000 | 0.442198000  |
| C                | 3.528648000  | 2.942794000  | -1.534651000 | O | -0.382395000 | 1.295375000  | -0.795694000 |
| C                | 2.378725000  | 2.248212000  | -1.178895000 | O | 0.536825000  | -0.821287000 | -2.335611000 |
| C                | 3.512127000  | 4.437877000  | -1.695809000 | C | 0.279803000  | -0.013119000 | -3.328064000 |
| C                | 5.954648000  | -0.002602000 | -1.814340000 | O | 0.072225000  | 1.196979000  | -3.167312000 |
| C                | 3.356352000  | -1.305179000 | -1.053874000 | C | 0.241670000  | -0.651177000 | -4.692065000 |
| C                | 2.780382000  | -1.250961000 | 1.349445000  | H | 0.073727000  | 0.101435000  | -5.460929000 |
| C                | 3.793967000  | -2.276051000 | 1.885347000  | H | 1.182164000  | -1.177705000 | -4.871487000 |
| C                | 3.285524000  | -3.717902000 | 1.802623000  | H | -0.568390000 | -1.386614000 | -4.705522000 |
| C                | 2.888026000  | -4.045378000 | 0.359787000  | O | -3.563003000 | 1.312002000  | 1.443286000  |
| C                | 1.856463000  | -3.036858000 | -0.145750000 | C | -5.522705000 | -1.343469000 | -1.209916000 |
| H                | -3.864372000 | -3.342890000 | 1.407896000  | C | -4.966471000 | -0.377843000 | -0.372473000 |
| H                | -1.052046000 | -2.344116000 | -1.678736000 | C | -3.891349000 | 0.401506000  | -0.812326000 |
| H                | -4.203023000 | -4.132955000 | -1.026594000 | C | -3.363274000 | 0.178357000  | -2.098126000 |

|                  |              |              |              |   |              |              |              |
|------------------|--------------|--------------|--------------|---|--------------|--------------|--------------|
| C                | -3.913115000 | -0.792188000 | -2.931149000 | C | 4.749701000  | -0.609654000 | -0.739976000 |
| C                | -4.999733000 | -1.553463000 | -2.490986000 | C | 4.739612000  | -1.969595000 | -1.442643000 |
| H                | -6.361712000 | -1.938614000 | -0.863426000 | C | 3.629602000  | -1.993355000 | -2.497785000 |
| H                | -5.358588000 | -0.236848000 | 0.628258000  | C | 2.283979000  | -1.667980000 | -1.852217000 |
| H                | -2.509259000 | 0.760997000  | -2.429475000 | H | -0.676756000 | -5.638484000 | 1.210776000  |
| H                | -3.493043000 | -0.959037000 | -3.917926000 | H | -0.825542000 | -2.337098000 | -1.545522000 |
| H                | -5.430285000 | -2.312781000 | -3.135695000 | H | -2.271305000 | -5.578028000 | -1.014548000 |
| C                | -3.238727000 | 1.446354000  | 0.059427000  | H | -0.644180000 | -5.817865000 | -1.647119000 |
| H                | -4.414148000 | 1.732256000  | 1.619458000  | H | -1.645880000 | -4.505152000 | -2.281628000 |
| H                | -2.154380000 | 1.260088000  | -0.003118000 | H | 1.498626000  | -4.185608000 | 3.475753000  |
| C                | -3.447358000 | 2.888247000  | -0.427879000 | H | 0.126019000  | -5.298156000 | 3.406227000  |
| H                | -4.463881000 | 3.211873000  | -0.173460000 | H | -0.082394000 | -3.670527000 | 4.068440000  |
| H                | -3.371371000 | 2.915346000  | -1.517827000 | H | 0.162659000  | -0.862364000 | 2.986475000  |
| C                | -2.396793000 | 3.857614000  | 0.143885000  | H | 1.580174000  | -1.883155000 | 3.182425000  |
| H                | -1.406976000 | 3.586780000  | -0.227430000 | H | 2.687876000  | -2.041768000 | 0.778964000  |
| H                | -2.627683000 | 4.874805000  | -0.188691000 | H | 3.699771000  | -1.970721000 | 2.898787000  |
| C                | -2.319256000 | 3.870644000  | 1.651305000  | H | 4.948420000  | -1.595538000 | 1.745889000  |
| O                | -3.459339000 | 4.317757000  | 2.222915000  | H | 5.032328000  | -0.096854000 | 3.768205000  |
| H                | -3.348904000 | 4.292180000  | 3.187422000  | H | 4.748421000  | 0.850242000  | 2.313439000  |
| O                | -1.350499000 | 3.545436000  | 2.307973000  | H | 3.138912000  | 1.585257000  | 4.052106000  |
| <sup>3</sup> IM1 |              |              |              | H | 2.606930000  | -0.070233000 | 4.310944000  |
| Mn               | 0.460105000  | -0.029017000 | -0.033740000 | H | 1.004316000  | 1.168288000  | 2.807406000  |
| N                | -0.020352000 | -1.974681000 | 0.308979000  | H | 2.342075000  | 1.584425000  | 1.749627000  |
| N                | 1.696317000  | -0.409373000 | 1.629817000  | H | 2.034177000  | 5.413331000  | -1.528519000 |
| N                | 1.029267000  | 1.886749000  | -0.411531000 | H | -0.081783000 | 2.739065000  | 1.089146000  |
| N                | 2.260322000  | -0.354625000 | -1.130731000 | H | 0.032539000  | 6.222387000  | -0.006278000 |
| C                | 0.311265000  | -2.428317000 | 1.533479000  | H | 1.177473000  | 5.870540000  | 1.288241000  |
| C                | 0.069958000  | -3.754465000 | 1.913923000  | H | -0.442276000 | 5.152905000  | 1.324148000  |
| C                | -0.496088000 | -4.597940000 | 0.955938000  | H | 4.159711000  | 3.021352000  | -2.877141000 |
| C                | -0.822583000 | -4.136939000 | -0.323738000 | H | 3.338271000  | 4.529513000  | -3.300018000 |
| C                | -0.585042000 | -2.792610000 | -0.593168000 | H | 2.776380000  | 2.991930000  | -3.972402000 |
| C                | -1.381292000 | -5.054827000 | -1.376410000 | H | 1.654637000  | 0.517643000  | -2.937747000 |
| C                | 0.421034000  | -4.253664000 | 3.291031000  | H | 3.322777000  | 0.880832000  | -2.518968000 |
| C                | 0.939193000  | -1.404932000 | 2.440808000  | H | 3.431663000  | 0.819995000  | 0.142380000  |
| C                | 2.968784000  | -1.039215000 | 1.105421000  | H | 5.028241000  | 0.164106000  | -1.463071000 |
| C                | 4.036927000  | -1.199260000 | 2.198545000  | H | 5.511447000  | -0.565337000 | 0.041458000  |
| C                | 4.305585000  | 0.092993000  | 2.973023000  | H | 5.714663000  | -2.155594000 | -1.902188000 |
| C                | 2.990862000  | 0.622566000  | 3.553101000  | H | 4.574042000  | -2.775240000 | -0.715805000 |
| C                | 1.969708000  | 0.823336000  | 2.435214000  | H | 3.550134000  | -2.980025000 | -2.964494000 |
| C                | 1.863352000  | 2.042632000  | -1.453334000 | H | 3.856765000  | -1.282016000 | -3.300084000 |
| C                | 2.256346000  | 3.311747000  | -1.898658000 | H | 1.470377000  | -1.637202000 | -2.577532000 |
| C                | 1.752552000  | 4.414093000  | -1.208042000 | H | 2.042714000  | -2.447257000 | -1.129539000 |
| C                | 0.903100000  | 4.257357000  | -0.107026000 | O | -0.914682000 | 0.548321000  | 1.068971000  |
| C                | 0.566498000  | 2.955877000  | 0.251027000  | O | -0.450181000 | -0.126486000 | -1.750553000 |
| C                | 0.383839000  | 5.437209000  | 0.669486000  | C | -1.201593000 | 0.708617000  | -2.407598000 |
| C                | 3.181458000  | 3.472767000  | -3.076284000 | O | -1.683355000 | 1.748525000  | -1.955483000 |
| C                | 2.318553000  | 0.768367000  | -2.107352000 | C | -1.438031000 | 0.288716000  | -3.851336000 |
| C                | 3.389180000  | -0.235396000 | -0.131366000 | H | -2.283022000 | 0.830880000  | -4.278031000 |

|                  |              |              |              |   |              |              |              |
|------------------|--------------|--------------|--------------|---|--------------|--------------|--------------|
| H                | -0.542238000 | 0.521966000  | -4.437829000 | C | 3.086873000  | 3.898474000  | -1.078516000 |
| H                | -1.604911000 | -0.788266000 | -3.920820000 | C | 2.225553000  | 4.000121000  | 0.021083000  |
| O                | -3.955245000 | 0.338002000  | 1.806625000  | C | 1.527006000  | 2.849016000  | 0.376020000  |
| C                | -4.083334000 | -3.080744000 | -0.414871000 | C | 2.071557000  | 5.281094000  | 0.795287000  |
| C                | -4.020244000 | -1.928021000 | 0.347451000  | C | 4.173614000  | 2.590266000  | -2.956950000 |
| C                | -4.029894000 | -0.657796000 | -0.283196000 | C | 2.543219000  | 0.261174000  | -2.013420000 |
| C                | -4.087099000 | -0.582855000 | -1.693876000 | C | 3.157049000  | -1.124575000 | -0.054820000 |
| C                | -4.146667000 | -1.746466000 | -2.447455000 | C | 4.391486000  | -1.813314000 | -0.658337000 |
| C                | -4.153569000 | -2.991424000 | -1.811650000 | C | 4.039903000  | -3.069365000 | -1.459999000 |
| H                | -4.082900000 | -4.049716000 | 0.070276000  | C | 3.009739000  | -2.724409000 | -2.540200000 |
| H                | -3.973533000 | -1.989802000 | 1.427223000  | C | 1.781396000  | -2.063324000 | -1.916289000 |
| H                | -4.080265000 | 0.372732000  | -2.198888000 | H | -2.293937000 | -5.469452000 | 0.994630000  |
| H                | -4.193742000 | -1.686131000 | -3.528403000 | H | -1.509853000 | -2.199866000 | -1.687612000 |
| H                | -4.212613000 | -3.897004000 | -2.405821000 | H | -3.854446000 | -4.820798000 | -1.228609000 |
| C                | -4.013821000 | 0.525931000  | 0.529486000  | H | -2.394701000 | -5.615846000 | -1.812226000 |
| H                | -3.975542000 | 1.195573000  | 2.319663000  | H | -2.868140000 | -4.048049000 | -2.483858000 |
| H                | -1.462626000 | -0.168569000 | 1.404919000  | H | 0.183911000  | -4.703077000 | 3.298110000  |
| C                | -4.111430000 | 1.925119000  | 0.004692000  | H | -1.428031000 | -5.421557000 | 3.190326000  |
| H                | -5.111263000 | 2.292300000  | 0.271337000  | H | -1.217824000 | -3.813751000 | 3.897239000  |
| H                | -4.048162000 | 1.913876000  | -1.077876000 | H | -0.279915000 | -1.157988000 | 2.913678000  |
| C                | -3.005942000 | 2.880493000  | 0.511906000  | H | 0.836213000  | -2.499163000 | 3.082100000  |
| H                | -2.069844000 | 2.311051000  | 0.565680000  | H | 1.975351000  | -2.767557000 | 0.663346000  |
| H                | -2.856923000 | 3.668656000  | -0.224547000 | H | 2.863247000  | -3.098930000 | 2.825512000  |
| C                | -3.217227000 | 3.547063000  | 1.843119000  | H | 4.220784000  | -2.982325000 | 1.743220000  |
| O                | -3.913774000 | 2.756370000  | 2.723824000  | H | 4.585062000  | -1.680761000 | 3.867108000  |
| H                | -3.987878000 | 3.185110000  | 3.593033000  | H | 4.611978000  | -0.603995000 | 2.477577000  |
| O                | -2.805492000 | 4.630530000  | 2.168067000  | H | 3.165688000  | 0.407251000  | 4.217269000  |
| <sup>5</sup> IMI |              |              |              | H | 2.229407000  | -1.074725000 | 4.354377000  |
| Mn               | 0.380004000  | -0.111244000 | -0.085993000 | H | 1.031951000  | 0.600343000  | 2.908743000  |
| N                | -0.663464000 | -2.103074000 | 0.182218000  | H | 2.464433000  | 0.751117000  | 1.908130000  |
| N                | 1.372331000  | -1.022632000 | 1.637399000  | H | 3.647662000  | 4.772620000  | -1.398349000 |
| N                | 1.663240000  | 1.693178000  | -0.284829000 | H | 0.841157000  | 2.835594000  | 1.215668000  |
| N                | 2.103201000  | -0.838588000 | -1.108033000 | H | 2.032962000  | 6.141351000  | 0.121053000  |
| C                | -0.481786000 | -2.650199000 | 1.389653000  | H | 2.925105000  | 5.430188000  | 1.466251000  |
| C                | -1.066220000 | -3.876733000 | 1.741228000  | H | 1.161433000  | 5.273616000  | 1.398430000  |
| C                | -1.834769000 | -4.511930000 | 0.763715000  | H | 4.969979000  | 1.860749000  | -2.772503000 |
| C                | -2.020457000 | -3.949466000 | -0.504561000 | H | 4.642049000  | 3.552948000  | -3.169790000 |
| C                | -1.413107000 | -2.718757000 | -0.740096000 | H | 3.637802000  | 2.267290000  | -3.855645000 |
| C                | -2.829147000 | -4.641287000 | -1.567792000 | H | 1.861028000  | 0.268013000  | -2.867522000 |
| C                | -0.872410000 | -4.485804000 | 3.105268000  | H | 3.542038000  | 0.062768000  | -2.403913000 |
| C                | 0.361082000  | -1.843508000 | 2.350966000  | H | 3.469797000  | -0.149611000 | 0.320880000  |
| C                | 2.475311000  | -1.895829000 | 1.087794000  | H | 4.903809000  | -1.099039000 | -1.310699000 |
| C                | 3.417568000  | -2.396330000 | 2.194803000  | H | 5.099956000  | -2.032694000 | 0.143167000  |
| C                | 3.964483000  | -1.264322000 | 3.068382000  | H | 4.945455000  | -3.485475000 | -1.910767000 |
| C                | 2.801218000  | -0.456490000 | 3.652682000  | H | 3.633531000  | -3.843788000 | -0.797335000 |
| C                | 1.899530000  | 0.057432000  | 2.531291000  | H | 2.674226000  | -3.624338000 | -3.064691000 |
| C                | 2.498633000  | 1.601444000  | -1.326197000 | H | 3.459108000  | -2.069913000 | -3.295436000 |
| C                | 3.247917000  | 2.699489000  | -1.774153000 | H | 1.047647000  | -1.758112000 | -2.662227000 |

|                                              |              |              |              |   |              |              |              |
|----------------------------------------------|--------------|--------------|--------------|---|--------------|--------------|--------------|
| H                                            | 1.289672000  | -2.773960000 | -1.253486000 | C | -2.877223000 | 0.150698000  | 1.457148000  |
| O                                            | -0.845034000 | 0.743377000  | 0.999115000  | C | -3.741395000 | 0.040130000  | 2.723242000  |
| O                                            | -0.468471000 | 0.046174000  | -1.851254000 | C | -3.435092000 | -1.205018000 | 3.557390000  |
| C                                            | -0.997945000 | 1.054721000  | -2.486967000 | C | -1.944615000 | -1.229812000 | 3.904658000  |
| O                                            | -1.148680000 | 2.182971000  | -2.018529000 | C | -1.110369000 | -1.179933000 | 2.627063000  |
| C                                            | -1.400132000 | 0.721827000  | -3.914414000 | C | -1.304468000 | -2.596072000 | -1.238477000 |
| H                                            | -2.065934000 | 1.486345000  | -4.316950000 | C | -1.334575000 | -3.949245000 | -1.598951000 |
| H                                            | -0.497345000 | 0.680944000  | -4.533621000 | C | -0.397218000 | -4.789374000 | -0.997805000 |
| H                                            | -1.875757000 | -0.259911000 | -3.962419000 | C | 0.524645000  | -4.301386000 | -0.064801000 |
| O                                            | -3.667549000 | 1.489106000  | 1.860879000  | C | 0.475411000  | -2.941606000 | 0.218909000  |
| C                                            | -4.695604000 | -1.796124000 | -0.329938000 | C | 1.539143000  | -5.195823000 | 0.594815000  |
| C                                            | -4.329921000 | -0.693428000 | 0.421619000  | C | -2.340236000 | -4.467816000 | -2.592416000 |
| C                                            | -4.024106000 | 0.534150000  | -0.219293000 | C | -2.244300000 | -1.574022000 | -1.806609000 |
| C                                            | -4.091825000 | 0.617086000  | -1.628600000 | C | -3.209772000 | -0.833936000 | 0.333073000  |
| C                                            | -4.464285000 | -0.494736000 | -2.371112000 | C | -4.699374000 | -0.958667000 | -0.022976000 |
| C                                            | -4.769445000 | -1.696339000 | -1.725781000 | C | -5.254579000 | 0.283547000  | -0.723748000 |
| H                                            | -4.927790000 | -2.732860000 | 0.162832000  | C | -4.409566000 | 0.596409000  | -1.962073000 |
| H                                            | -4.281560000 | -0.761863000 | 1.501051000  | C | -2.942365000 | 0.764314000  | -1.571815000 |
| H                                            | -3.855254000 | 1.538397000  | -2.141828000 | H | -0.940386000 | 5.672049000  | 0.774777000  |
| H                                            | -4.521440000 | -0.426340000 | -3.451066000 | H | -0.202207000 | 2.365386000  | -1.874074000 |
| H                                            | -5.065353000 | -2.559884000 | -2.311646000 | H | 0.188142000  | 5.944942000  | -1.656858000 |
| C                                            | -3.669773000 | 1.673144000  | 0.582461000  | H | -1.478508000 | 5.557901000  | -2.087668000 |
| H                                            | -3.417355000 | 2.315898000  | 2.363108000  | H | -0.148359000 | 4.617054000  | -2.782104000 |
| H                                            | -1.528667000 | 0.154140000  | 1.337021000  | H | -2.144897000 | 3.803701000  | 3.431112000  |
| C                                            | -3.368902000 | 3.038247000  | 0.044209000  | H | -1.230633000 | 5.277626000  | 3.088784000  |
| H                                            | -4.208763000 | 3.682079000  | 0.337317000  | H | -0.407427000 | 3.854744000  | 3.742797000  |
| H                                            | -3.346501000 | 3.006129000  | -1.039441000 | H | 0.044595000  | 1.080152000  | 2.880680000  |
| C                                            | -2.018277000 | 3.637082000  | 0.502456000  | H | -1.590718000 | 1.579287000  | 3.191848000  |
| H                                            | -1.276305000 | 2.830964000  | 0.514969000  | H | -2.998371000 | 1.163019000  | 1.070387000  |
| H                                            | -1.687694000 | 4.362145000  | -0.240111000 | H | -3.575577000 | 0.931704000  | 3.336692000  |
| C                                            | -1.972647000 | 4.322173000  | 1.841056000  | H | -4.792624000 | 0.083201000  | 2.431572000  |
| O                                            | -2.851242000 | 3.779388000  | 2.745249000  | H | -4.044438000 | -1.200151000 | 4.465365000  |
| H                                            | -2.762018000 | 4.204530000  | 3.614887000  | H | -3.699330000 | -2.114124000 | 3.002598000  |
| O                                            | -1.235201000 | 5.222121000  | 2.149674000  | H | -1.678025000 | -2.145162000 | 4.441419000  |
| <sup>3</sup> TS <sub>2</sub> <sup>diol</sup> |              |              |              | H | -1.694041000 | -0.391667000 | 4.564925000  |
| Mn                                           | -0.427592000 | -0.097430000 | -0.123435000 | H | -0.040252000 | -1.172926000 | 2.839375000  |
| N                                            | -0.543528000 | 1.921792000  | 0.101666000  | H | -1.313891000 | -2.071055000 | 2.033913000  |
| N                                            | -1.393662000 | 0.007544000  | 1.753824000  | H | -0.393201000 | -5.845436000 | -1.252292000 |
| N                                            | -0.408126000 | -2.117737000 | -0.359424000 | H | 1.143851000  | -2.474654000 | 0.925450000  |
| N                                            | -2.368168000 | -0.426950000 | -0.860276000 | H | 2.327638000  | -5.473205000 | -0.113275000 |
| C                                            | -0.792468000 | 2.352004000  | 1.353472000  | H | 1.074488000  | -6.121381000 | 0.945800000  |
| C                                            | -0.928074000 | 3.713138000  | 1.649485000  | H | 2.009603000  | -4.702986000 | 1.448445000  |
| C                                            | -0.825562000 | 4.609039000  | 0.583150000  | H | -3.364052000 | -4.337707000 | -2.224880000 |
| C                                            | -0.581273000 | 4.166762000  | -0.719909000 | H | -2.182708000 | -5.531508000 | -2.778838000 |
| C                                            | -0.424611000 | 2.796715000  | -0.907348000 | H | -2.265869000 | -3.940028000 | -3.548451000 |
| C                                            | -0.496220000 | 5.121239000  | -1.878573000 | H | -1.857360000 | -1.185941000 | -2.751250000 |
| C                                            | -1.190428000 | 4.187664000  | 3.054407000  | H | -3.219474000 | -2.013728000 | -2.017800000 |
| C                                            | -0.916943000 | 1.270198000  | 2.392296000  | H | -2.855573000 | -1.824430000 | 0.622304000  |

|                                  |              |              |              |   |              |              |              |
|----------------------------------|--------------|--------------|--------------|---|--------------|--------------|--------------|
| H                                | -4.827649000 | -1.828151000 | -0.675463000 | C | -4.161221000 | -0.284518000 | 1.141074000  |
| H                                | -5.258298000 | -1.194420000 | 0.884964000  | C | -4.912464000 | -0.001030000 | -0.002720000 |
| H                                | -6.298694000 | 0.114560000  | -1.001573000 | C | -4.303267000 | 0.250970000  | -1.235233000 |
| H                                | -5.243833000 | 1.144344000  | -0.043223000 | C | -2.910460000 | 0.204766000  | -1.270397000 |
| H                                | -4.736066000 | 1.526160000  | -2.437526000 | C | -5.100698000 | 0.557604000  | -2.472823000 |
| H                                | -4.524289000 | -0.196818000 | -2.709235000 | C | -4.821199000 | -0.527392000 | 2.473015000  |
| H                                | -2.301486000 | 0.948037000  | -2.434375000 | C | -1.820435000 | -0.601854000 | 2.122298000  |
| H                                | -2.848420000 | 1.623129000  | -0.908851000 | C | -0.973332000 | -2.725920000 | 1.182742000  |
| O                                | 1.305802000  | -0.134586000 | 0.763599000  | C | -1.290461000 | -3.647103000 | 2.369978000  |
| O                                | 0.122784000  | 0.159261000  | -1.936869000 | C | -0.174789000 | -3.676912000 | 3.416086000  |
| C                                | 0.858157000  | -0.516193000 | -2.784181000 | C | 0.115068000  | -2.251775000 | 3.893191000  |
| O                                | 1.586650000  | -1.461334000 | -2.489890000 | C | 0.450922000  | -1.348392000 | 2.706478000  |
| C                                | 0.737609000  | -0.000984000 | -4.205963000 | C | 2.608445000  | -1.756061000 | -0.883216000 |
| H                                | 1.417299000  | -0.537336000 | -4.867800000 | C | 3.952102000  | -2.015915000 | -1.197939000 |
| H                                | -0.291084000 | -0.124693000 | -4.558598000 | C | 4.916074000  | -1.332048000 | -0.458537000 |
| H                                | 0.960083000  | 1.069378000  | -4.229154000 | C | 4.558675000  | -0.441749000 | 0.563187000  |
| O                                | 3.498156000  | 0.744615000  | 1.689359000  | C | 3.198340000  | -0.275520000 | 0.797517000  |
| C                                | 2.663706000  | 4.104553000  | -0.462311000 | C | 5.587830000  | 0.309346000  | 1.362965000  |
| C                                | 2.774979000  | 2.935886000  | 0.280909000  | C | 4.328655000  | -2.973801000 | -2.296424000 |
| C                                | 2.956419000  | 1.701616000  | -0.368038000 | C | 1.477917000  | -2.380563000 | -1.659470000 |
| C                                | 3.010138000  | 1.659014000  | -1.769399000 | C | 0.135886000  | -3.220475000 | 0.243260000  |
| C                                | 2.899438000  | 2.834220000  | -2.508354000 | C | 0.009751000  | -4.686006000 | -0.202763000 |
| C                                | 2.734261000  | 4.057876000  | -1.857786000 | C | -1.161838000 | -4.920038000 | -1.159865000 |
| H                                | 2.523108000  | 5.052789000  | 0.044798000  | C | -1.042182000 | -3.981855000 | -2.364528000 |
| H                                | 2.730438000  | 2.973832000  | 1.362255000  | C | -0.953716000 | -2.529258000 | -1.899004000 |
| H                                | 3.161502000  | 0.720919000  | -2.286534000 | H | -5.995693000 | 0.033725000  | 0.074152000  |
| H                                | 2.957397000  | 2.794641000  | -3.590722000 | H | -2.352102000 | 0.402784000  | -2.178400000 |
| H                                | 2.657889000  | 4.972802000  | -2.435529000 | H | -5.940895000 | 1.218895000  | -2.244679000 |
| C                                | 3.184790000  | 0.486209000  | 0.435968000  | H | -5.513395000 | -0.360443000 | -2.905544000 |
| H                                | 3.945679000  | -0.001306000 | 2.151687000  | H | -4.479264000 | 1.036893000  | -3.232765000 |
| H                                | 1.275010000  | 0.318313000  | 1.613358000  | H | -4.603890000 | -1.532229000 | 2.851193000  |
| C                                | 3.690728000  | -0.767598000 | -0.229584000 | H | -5.904950000 | -0.429829000 | 2.386855000  |
| H                                | 4.645241000  | -0.505381000 | -0.702476000 | H | -4.476136000 | 0.188752000  | 3.225630000  |
| H                                | 2.992402000  | -1.015889000 | -1.030872000 | H | -1.493563000 | 0.341232000  | 2.570159000  |
| C                                | 3.855514000  | -2.029395000 | 0.643634000  | H | -2.308768000 | -1.171725000 | 2.912276000  |
| H                                | 3.015698000  | -2.116579000 | 1.334777000  | H | -1.889862000 | -2.611347000 | 0.604543000  |
| H                                | 3.852156000  | -2.898349000 | -0.013798000 | H | -2.217228000 | -3.301755000 | 2.838553000  |
| C                                | 5.134201000  | -2.083343000 | 1.444855000  | H | -1.514207000 | -4.644906000 | 1.987407000  |
| O                                | 5.058348000  | -1.254823000 | 2.530636000  | H | -0.472060000 | -4.309511000 | 4.257003000  |
| H                                | 5.900547000  | -1.242147000 | 3.015814000  | H | 0.735963000  | -4.119406000 | 2.993784000  |
| O                                | 6.113096000  | -2.741302000 | 1.205983000  | H | 0.969834000  | -2.229102000 | 4.575628000  |
| <sup>5</sup> TS <sub>2diol</sub> |              |              |              | H | -0.742705000 | -1.857085000 | 4.448753000  |
| Mn                               | 0.073050000  | -0.306069000 | -0.125623000 | H | 0.608389000  | -0.319497000 | 3.035979000  |
| N                                | -2.178651000 | -0.086619000 | -0.191937000 | H | 1.375323000  | -1.687164000 | 2.241925000  |
| N                                | -0.603889000 | -1.320862000 | 1.637293000  | H | 5.967147000  | -1.496972000 | -0.679610000 |
| N                                | 2.256347000  | -0.908249000 | 0.085549000  | H | 2.843748000  | 0.384171000  | 1.581805000  |
| N                                | 0.176672000  | -2.274138000 | -0.942522000 | H | 6.174037000  | 0.969253000  | 0.715242000  |
| C                                | -2.769786000 | -0.321469000 | 0.986388000  | H | 6.287334000  | -0.378774000 | 1.847691000  |

|   |              |              |              |                                  |              |              |              |
|---|--------------|--------------|--------------|----------------------------------|--------------|--------------|--------------|
| H | 5.118170000  | 0.922681000  | 2.135458000  | <sup>3</sup> IM2 <sub>dioI</sub> |              |              |              |
| H | 3.966269000  | -3.985702000 | -2.083716000 | Mn                               | 0.194784000  | 0.317999000  | 0.195550000  |
| H | 5.412971000  | -3.021796000 | -2.411485000 | N                                | -1.864762000 | 0.624906000  | 0.262115000  |
| H | 3.898843000  | -2.669184000 | -3.256556000 | N                                | -0.142926000 | 1.519706000  | -1.577198000 |
| H | 1.368369000  | -1.868761000 | -2.619559000 | N                                | 2.212455000  | 0.140474000  | -0.020310000 |
| H | 1.702124000  | -3.424126000 | -1.886729000 | N                                | 0.817549000  | 2.135417000  | 1.023376000  |
| H | 1.096804000  | -3.106366000 | 0.744610000  | C                                | -2.441581000 | 1.071411000  | -0.870335000 |
| H | 0.943057000  | -4.978966000 | -0.693760000 | C                                | -3.803839000 | 1.380044000  | -0.933438000 |
| H | -0.060666000 | -5.318292000 | 0.684720000  | C                                | -4.550842000 | 1.197451000  | 0.231284000  |
| H | -1.169707000 | -5.964295000 | -1.484493000 | C                                | -3.966451000 | 0.708622000  | 1.402124000  |
| H | -2.115728000 | -4.741515000 | -0.647749000 | C                                | -2.603286000 | 0.431582000  | 1.364539000  |
| H | -1.915055000 | -4.068166000 | -3.018549000 | C                                | -4.768702000 | 0.463462000  | 2.648748000  |
| H | -0.168080000 | -4.249407000 | -2.968457000 | C                                | -4.444010000 | 1.861735000  | -2.208412000 |
| H | -0.824589000 | -1.833158000 | -2.727775000 | C                                | -1.517131000 | 1.179893000  | -2.047475000 |
| H | -1.879824000 | -2.259655000 | -1.394378000 | C                                | -0.127658000 | 2.962316000  | -1.087340000 |
| O | 0.386308000  | 1.354603000  | 0.782274000  | C                                | -0.171788000 | 3.967519000  | -2.247361000 |
| O | 0.129489000  | 0.413686000  | -1.887503000 | C                                | 0.899014000  | 3.710255000  | -3.308984000 |
| C | 1.065806000  | 0.903402000  | -2.673773000 | C                                | 0.769235000  | 2.275574000  | -3.825634000 |
| O | 2.238807000  | 1.044411000  | -2.352092000 | C                                | 0.867797000  | 1.287752000  | -2.664988000 |
| C | 0.536737000  | 1.270322000  | -4.046635000 | C                                | 2.927084000  | 0.909003000  | 0.823160000  |
| H | 1.295240000  | 1.805607000  | -4.617568000 | C                                | 4.322372000  | 0.824000000  | 0.894615000  |
| H | 0.259132000  | 0.354809000  | -4.578808000 | C                                | 4.947786000  | -0.094231000 | 0.051322000  |
| H | -0.367209000 | 1.877918000  | -3.954400000 | C                                | 4.215034000  | -0.887913000 | -0.839874000 |
| O | 0.221993000  | 3.703053000  | 1.797307000  | C                                | 2.834881000  | -0.729410000 | -0.835813000 |
| C | -3.666458000 | 3.258045000  | 0.594383000  | C                                | 4.878662000  | -1.873033000 | -1.762260000 |
| C | -2.341700000 | 3.214478000  | 1.006744000  | C                                | 5.107031000  | 1.679121000  | 1.853262000  |
| C | -1.302649000 | 3.340249000  | 0.066099000  | C                                | 2.117677000  | 1.826989000  | 1.692370000  |
| C | -1.618369000 | 3.501691000  | -1.292278000 | C                                | 1.059025000  | 3.101296000  | -0.129830000 |
| C | -2.949186000 | 3.568034000  | -1.696641000 | C                                | 1.352210000  | 4.525593000  | 0.365948000  |
| C | -3.972874000 | 3.446452000  | -0.757135000 | C                                | 0.304430000  | 5.049495000  | 1.349871000  |
| H | -4.461742000 | 3.147180000  | 1.323074000  | C                                | 0.173410000  | 4.076387000  | 2.524170000  |
| H | -2.102367000 | 3.083642000  | 2.055126000  | C                                | -0.173683000 | 2.679275000  | 2.015110000  |
| H | -0.842010000 | 3.604553000  | -2.038641000 | H                                | -5.611900000 | 1.428732000  | 0.219321000  |
| H | -3.183850000 | 3.708721000  | -2.746011000 | H                                | -2.070453000 | 0.050163000  | 2.225127000  |
| H | -5.008892000 | 3.489240000  | -1.076070000 | H                                | -5.453565000 | -0.377273000 | 2.498343000  |
| C | 0.090499000  | 3.366570000  | 0.538941000  | H                                | -5.371443000 | 1.339346000  | 2.905137000  |
| H | 1.163254000  | 3.903183000  | 2.033863000  | H                                | -4.122593000 | 0.225440000  | 3.496281000  |
| H | 0.417165000  | 1.331052000  | 1.746016000  | H                                | -3.989153000 | 2.793372000  | -2.561032000 |
| C | 1.220097000  | 3.631107000  | -0.426915000 | H                                | -5.508548000 | 2.045462000  | -2.054034000 |
| H | 1.199932000  | 4.713885000  | -0.609865000 | H                                | -4.341701000 | 1.120195000  | -3.007380000 |
| H | 0.964547000  | 3.153494000  | -1.367610000 | H                                | -1.475931000 | 0.225214000  | -2.580550000 |
| C | 2.644493000  | 3.154219000  | -0.096948000 | H                                | -1.872023000 | 1.915198000  | -2.768844000 |
| H | 2.593571000  | 2.119906000  | 0.249385000  | H                                | -1.047383000 | 3.083614000  | -0.514655000 |
| H | 3.213502000  | 3.136085000  | -1.025345000 | H                                | -1.160943000 | 3.915315000  | -2.712938000 |
| C | 3.469636000  | 3.930262000  | 0.895961000  | H                                | -0.100355000 | 4.975930000  | -1.835269000 |
| O | 2.756415000  | 4.299147000  | 2.003753000  | H                                | 0.785487000  | 4.425419000  | -4.128071000 |
| H | 3.320629000  | 4.771085000  | 2.638848000  | H                                | 1.901592000  | 3.863920000  | -2.890582000 |
| O | 4.643283000  | 4.181851000  | 0.794805000  | H                                | 1.568973000  | 2.034064000  | -4.531642000 |



|   |              |              |              |                                  |              |              |              |
|---|--------------|--------------|--------------|----------------------------------|--------------|--------------|--------------|
| H | -0.176673000 | 2.148299000  | -4.363263000 | C                                | 1.542307000  | -3.729340000 | 0.416667000  |
| H | 0.742398000  | 0.259710000  | -3.010556000 | H                                | 1.987364000  | -2.759724000 | 0.193859000  |
| H | 1.857015000  | 1.361552000  | -2.215589000 | H                                | 1.899591000  | -4.025760000 | 1.402545000  |
| H | 6.029160000  | -0.190326000 | 0.085436000  | C                                | 2.097609000  | -4.744076000 | -0.551935000 |
| H | 2.202388000  | -1.308850000 | -1.494506000 | O                                | 1.916564000  | -4.371396000 | -1.855482000 |
| H | 5.515487000  | -2.560962000 | -1.198240000 | H                                | 2.296900000  | -5.050481000 | -2.438238000 |
| H | 5.515156000  | -1.355140000 | -2.486843000 | O                                | 2.667724000  | -5.766462000 | -0.261222000 |
| H | 4.140074000  | -2.460238000 | -2.311879000 | <sup>5</sup> IM2 <sub>dioI</sub> |              |              |              |
| H | 4.983956000  | 2.743868000  | 1.627691000  | Mn                               | 0.399922000  | 0.146601000  | 0.232761000  |
| H | 6.170760000  | 1.443404000  | 1.794134000  | N                                | -1.320438000 | 1.161103000  | 0.709090000  |
| H | 4.779998000  | 1.520969000  | 2.885705000  | N                                | 0.257726000  | 1.484058000  | -1.421297000 |
| H | 1.903228000  | 1.340802000  | 2.646827000  | N                                | 2.145197000  | -0.792292000 | -0.331551000 |
| H | 2.664703000  | 2.742902000  | 1.914981000  | N                                | 1.972677000  | 1.636435000  | 0.879289000  |
| H | 1.955850000  | 2.738211000  | -0.632975000 | C                                | -1.892462000 | 1.841707000  | -0.304493000 |
| H | 2.334422000  | 4.528703000  | 0.848577000  | C                                | -3.038879000 | 2.616237000  | -0.106059000 |
| H | 1.456159000  | 5.179254000  | -0.502371000 | C                                | -3.560786000 | 2.656755000  | 1.188732000  |
| H | 0.595952000  | 6.042491000  | 1.702561000  | C                                | -2.975200000 | 1.946849000  | 2.241410000  |
| H | -0.667405000 | 5.162357000  | 0.853259000  | C                                | -1.840370000 | 1.199628000  | 1.946397000  |
| H | -0.623860000 | 4.385218000  | 3.206579000  | C                                | -3.554074000 | 1.959784000  | 3.628622000  |
| H | 1.099879000  | 4.058240000  | 3.108835000  | C                                | -3.684091000 | 3.368909000  | -1.238146000 |
| H | -0.240269000 | 1.948768000  | 2.821484000  | C                                | -1.209397000 | 1.688037000  | -1.629910000 |
| H | -1.144328000 | 2.709406000  | 1.522364000  | C                                | 0.894339000  | 2.802765000  | -0.983517000 |
| O | -0.104866000 | -1.603989000 | -0.919831000 | C                                | 0.950502000  | 3.812408000  | -2.139771000 |
| O | 0.091940000  | -0.517753000 | 1.857660000  | C                                | 1.635865000  | 3.251695000  | -3.387144000 |
| C | 0.880670000  | -1.146717000 | 2.725167000  | C                                | 0.936182000  | 1.961739000  | -3.822650000 |
| O | 2.057791000  | -1.396030000 | 2.530002000  | C                                | 0.903521000  | 0.955522000  | -2.672866000 |
| C | 0.147611000  | -1.511060000 | 3.997607000  | C                                | 3.275051000  | -0.351530000 | 0.252133000  |
| H | 0.774679000  | -2.141640000 | 4.627107000  | C                                | 4.502849000  | -0.992827000 | 0.032254000  |
| H | -0.107985000 | -0.593549000 | 4.537145000  | C                                | 4.503941000  | -2.119080000 | -0.789170000 |
| H | -0.790237000 | -2.022095000 | 3.764957000  | C                                | 3.327263000  | -2.595376000 | -1.378890000 |
| O | -0.717580000 | -3.613165000 | -1.844167000 | C                                | 2.163991000  | -1.885900000 | -1.116351000 |
| C | -4.433283000 | -2.031605000 | -1.109841000 | C                                | 3.307650000  | -3.815434000 | -2.257494000 |
| C | -3.074646000 | -2.231187000 | -1.338090000 | C                                | 5.768152000  | -0.499333000 | 0.682694000  |
| C | -2.237987000 | -2.695223000 | -0.312884000 | C                                | 3.147497000  | 0.807510000  | 1.206430000  |
| C | -2.791835000 | -2.961652000 | 0.942842000  | C                                | 2.247228000  | 2.485755000  | -0.327803000 |
| C | -4.157919000 | -2.776744000 | 1.166729000  | C                                | 3.120501000  | 3.705942000  | 0.010037000  |
| C | -4.981192000 | -2.309821000 | 0.144558000  | C                                | 2.575187000  | 4.521500000  | 1.185453000  |
| H | -5.064481000 | -1.664552000 | -1.912518000 | C                                | 2.398691000  | 3.610655000  | 2.404738000  |
| H | -2.668100000 | -2.047222000 | -2.326958000 | C                                | 1.496186000  | 2.429940000  | 2.051123000  |
| H | -2.180970000 | -3.329346000 | 1.756833000  | H                                | -4.449166000 | 3.252110000  | 1.377443000  |
| H | -4.572035000 | -2.996403000 | 2.145281000  | H                                | -1.321121000 | 0.613663000  | 2.693169000  |
| H | -6.041202000 | -2.159168000 | 0.321912000  | H                                | -4.505043000 | 1.416843000  | 3.649264000  |
| C | -0.766185000 | -2.927792000 | -0.633265000 | H                                | -3.753097000 | 2.983236000  | 3.958401000  |
| H | 0.201606000  | -3.882575000 | -2.031912000 | H                                | -2.878461000 | 1.488049000  | 4.344890000  |
| H | -0.288813000 | -1.464734000 | -1.859198000 | H                                | -3.012268000 | 4.134398000  | -1.640523000 |
| C | 0.008676000  | -3.600702000 | 0.504143000  | H                                | -4.593511000 | 3.865096000  | -0.895897000 |
| H | -0.443751000 | -4.585517000 | 0.647647000  | H                                | -3.954018000 | 2.694703000  | -2.055436000 |
| H | -0.188061000 | -3.032727000 | 1.410928000  | H                                | -1.612278000 | 0.815941000  | -2.148712000 |

|   |              |              |              |                  |              |              |              |
|---|--------------|--------------|--------------|------------------|--------------|--------------|--------------|
| H | -1.391538000 | 2.547268000  | -2.273431000 | H                | -6.415002000 | 0.960584000  | -0.876075000 |
| H | 0.225891000  | 3.205763000  | -0.221709000 | C                | -2.062025000 | -2.256692000 | -0.656498000 |
| H | -0.068346000 | 4.121204000  | -2.392209000 | H                | -1.498356000 | -3.824747000 | -1.692575000 |
| H | 1.443521000  | 4.717356000  | -1.780016000 | H                | -0.862601000 | -1.340258000 | -1.917053000 |
| H | 1.604521000  | 3.992414000  | -4.190693000 | C                | -1.795243000 | -2.928612000 | 0.693022000  |
| H | 2.694704000  | 3.048678000  | -3.185310000 | H                | -2.672811000 | -3.531325000 | 0.940195000  |
| H | 1.462229000  | 1.487784000  | -4.656327000 | H                | -1.721929000 | -2.141420000 | 1.443464000  |
| H | -0.079022000 | 2.177755000  | -4.172649000 | C                | -0.508024000 | -3.772332000 | 0.829775000  |
| H | 0.365408000  | 0.052436000  | -2.964337000 | H                | 0.345278000  | -3.241981000 | 0.403683000  |
| H | 1.919642000  | 0.658583000  | -2.418563000 | H                | -0.316757000 | -3.915853000 | 1.893255000  |
| H | 5.439417000  | -2.641123000 | -0.968380000 | C                | -0.567897000 | -5.159734000 | 0.235129000  |
| H | 1.217560000  | -2.199103000 | -1.532553000 | O                | -0.393366000 | -5.146165000 | -1.118778000 |
| H | 3.767276000  | -4.666351000 | -1.746234000 | H                | -0.458598000 | -6.053559000 | -1.461981000 |
| H | 3.875022000  | -3.638824000 | -3.176930000 | O                | -0.742401000 | -6.185501000 | 0.845440000  |
| H | 2.286462000  | -4.088865000 | -2.531639000 | <sup>3</sup> TS3 |              |              |              |
| H | 6.000386000  | 0.525652000  | 0.375016000  | Mn               | -0.420169000 | -0.116368000 | 0.246377000  |
| H | 6.611551000  | -1.134032000 | 0.406121000  | N                | 1.371740000  | -1.136838000 | 0.670392000  |
| H | 5.683075000  | -0.504232000 | 1.773972000  | N                | -0.228360000 | -1.487915000 | -1.467954000 |
| H | 3.020590000  | 0.405728000  | 2.216198000  | N                | -2.196513000 | 0.768274000  | -0.275768000 |
| H | 4.067805000  | 1.395320000  | 1.214574000  | N                | -1.818706000 | -1.626334000 | 0.894726000  |
| H | 2.819802000  | 1.857134000  | -1.012067000 | C                | 1.952294000  | -1.770051000 | -0.365583000 |
| H | 4.122319000  | 3.342541000  | 0.262980000  | C                | 3.163801000  | -2.457585000 | -0.218459000 |
| H | 3.250649000  | 4.319095000  | -0.883880000 | C                | 3.754643000  | -2.445740000 | 1.045070000  |
| H | 3.260862000  | 5.342440000  | 1.413532000  | C                | 3.161722000  | -1.780009000 | 2.121898000  |
| H | 1.612529000  | 4.978837000  | 0.922674000  | C                | 1.952486000  | -1.137206000 | 1.880449000  |
| H | 1.945144000  | 4.152238000  | 3.240323000  | C                | 3.810111000  | -1.726498000 | 3.477387000  |
| H | 3.375564000  | 3.251879000  | 2.749713000  | C                | 3.806085000  | -3.170676000 | -1.378132000 |
| H | 1.387066000  | 1.734087000  | 2.884928000  | C                | 1.236005000  | -1.651914000 | -1.681976000 |
| H | 0.496583000  | 2.801966000  | 1.816120000  | C                | -0.832704000 | -2.807749000 | -1.028351000 |
| O | -0.865297000 | -1.409339000 | -0.952347000 | C                | -0.937960000 | -3.802370000 | -2.195221000 |
| O | 0.286169000  | -0.734695000 | 1.883908000  | C                | -1.652548000 | -3.218130000 | -3.416079000 |
| C | 1.004880000  | -1.534602000 | 2.668953000  | C                | -0.950257000 | -1.930449000 | -3.856478000 |
| O | 2.052662000  | -2.061791000 | 2.341465000  | C                | -0.889822000 | -0.937170000 | -2.697015000 |
| C | 0.367544000  | -1.712433000 | 4.029955000  | C                | -3.286960000 | 0.270220000  | 0.343565000  |
| H | 0.898945000  | -2.475217000 | 4.598313000  | C                | -4.554786000 | 0.831205000  | 0.157062000  |
| H | 0.406667000  | -0.760767000 | 4.569525000  | C                | -4.645036000 | 1.943101000  | -0.683091000 |
| H | -0.686093000 | -1.983687000 | 3.924823000  | C                | -3.518489000 | 2.474044000  | -1.318400000 |
| O | -2.188860000 | -3.137874000 | -1.728006000 | C                | -2.304214000 | 1.840373000  | -1.076232000 |
| C | -4.857832000 | -0.039845000 | -1.984948000 | C                | -3.592266000 | 3.665092000  | -2.234078000 |
| C | -3.743750000 | -0.872834000 | -1.911833000 | C                | -5.767488000 | 0.274507000  | 0.855205000  |
| C | -3.294209000 | -1.357909000 | -0.673932000 | C                | -3.035913000 | -0.864666000 | 1.297879000  |
| C | -3.986319000 | -0.999434000 | 0.485912000  | C                | -2.148763000 | -2.492320000 | -0.309655000 |
| C | -5.109087000 | -0.171758000 | 0.409741000  | C                | -2.999087000 | -3.712613000 | 0.078906000  |
| C | -5.546437000 | 0.312500000  | -0.821296000 | C                | -2.393184000 | -4.525059000 | 1.225278000  |
| H | -5.193301000 | 0.325411000  | -2.950303000 | C                | -2.161220000 | -3.612251000 | 2.432416000  |
| H | -3.235320000 | -1.168645000 | -2.823348000 | C                | -1.277231000 | -2.430259000 | 2.039760000  |
| H | -3.671214000 | -1.358540000 | 1.457386000  | H                | 4.699282000  | -2.961789000 | 1.189878000  |
| H | -5.637669000 | 0.094052000  | 1.319232000  | H                | 1.422394000  | -0.596942000 | 2.654231000  |

|   |              |              |              |                  |              |              |              |
|---|--------------|--------------|--------------|------------------|--------------|--------------|--------------|
| H | 4.717856000  | -1.114394000 | 3.441038000  | C                | 4.053920000  | 1.211933000  | 0.524486000  |
| H | 4.102199000  | -2.725782000 | 3.812781000  | C                | 5.274219000  | 0.551219000  | 0.375182000  |
| H | 3.138849000  | -1.292780000 | 4.221643000  | C                | 5.659547000  | 0.055854000  | -0.869265000 |
| H | 3.170749000  | -3.983494000 | -1.746224000 | H                | 5.105255000  | -0.164924000 | -2.943681000 |
| H | 4.763800000  | -3.599883000 | -1.078992000 | H                | 2.937722000  | 0.948135000  | -2.684095000 |
| H | 3.988510000  | -2.488109000 | -2.212707000 | H                | 3.778432000  | 1.592589000  | 1.499780000  |
| H | 1.593678000  | -0.765669000 | -2.207473000 | H                | 5.922701000  | 0.428978000  | 1.236193000  |
| H | 1.440116000  | -2.512171000 | -2.319386000 | H                | 6.611142000  | -0.452526000 | -0.983097000 |
| H | -0.132534000 | -3.222091000 | -0.301438000 | C                | 1.864092000  | 2.061878000  | -0.426248000 |
| H | 0.073221000  | -4.107997000 | -2.482118000 | H                | 2.377682000  | 3.042426000  | -2.278762000 |
| H | -1.424836000 | -4.712184000 | -1.838473000 | H                | 0.834130000  | 2.183084000  | -1.776736000 |
| H | -1.654892000 | -3.951286000 | -4.227445000 | C                | 1.672095000  | 2.905915000  | 0.821735000  |
| H | -2.702661000 | -3.004045000 | -3.180635000 | H                | 2.542265000  | 3.552749000  | 0.947676000  |
| H | -1.486179000 | -1.449784000 | -4.680271000 | H                | 1.646341000  | 2.214284000  | 1.666299000  |
| H | 0.057680000  | -2.155208000 | -4.223035000 | C                | 0.381646000  | 3.734125000  | 0.834008000  |
| H | -0.347307000 | -0.029736000 | -2.966102000 | H                | -0.492664000 | 3.119333000  | 0.631438000  |
| H | -1.902830000 | -0.642628000 | -2.422286000 | H                | 0.258526000  | 4.149051000  | 1.840328000  |
| H | -5.613877000 | 2.408533000  | -0.839844000 | C                | 0.343031000  | 4.907336000  | -0.118063000 |
| H | -1.389174000 | 2.197499000  | -1.526022000 | O                | 1.447842000  | 5.677892000  | -0.036198000 |
| H | -4.413267000 | 4.326320000  | -1.946874000 | H                | 1.351446000  | 6.419349000  | -0.655877000 |
| H | -3.769337000 | 3.345211000  | -3.267059000 | O                | -0.587881000 | 5.175190000  | -0.847490000 |
| H | -2.659355000 | 4.232940000  | -2.208933000 | <sup>5</sup> TS3 |              |              |              |
| H | -5.943052000 | -0.769690000 | 0.575759000  | Mn               | -0.392295000 | -0.116360000 | 0.245350000  |
| H | -6.657802000 | 0.847790000  | 0.591567000  | N                | 1.290524000  | -1.222417000 | 0.687889000  |
| H | -5.651760000 | 0.309133000  | 1.943216000  | N                | -0.323297000 | -1.417024000 | -1.439239000 |
| H | -2.868799000 | -0.457454000 | 2.297953000  | N                | -2.142346000 | 0.867880000  | -0.250979000 |
| H | -3.902002000 | -1.523430000 | 1.361184000  | N                | -2.017112000 | -1.605356000 | 0.864757000  |
| H | -2.755086000 | -1.862973000 | -0.962684000 | C                | 1.833774000  | -1.872533000 | -0.359127000 |
| H | -3.994256000 | -3.363975000 | 0.372453000  | C                | 2.991966000  | -2.643917000 | -0.215208000 |
| H | -3.158631000 | -4.324219000 | -0.811286000 | C                | 3.565286000  | -2.697234000 | 1.056397000  |
| H | -3.063526000 | -5.348301000 | 1.487546000  | C                | 3.008100000  | -2.016718000 | 2.144150000  |
| H | -1.442761000 | -4.977616000 | 0.915395000  | C                | 1.849908000  | -1.285632000 | 1.906687000  |
| H | -1.660483000 | -4.148857000 | 3.243773000  | C                | 3.642860000  | -2.043104000 | 3.506571000  |
| H | -3.119944000 | -3.260306000 | 2.829959000  | C                | 3.595549000  | -3.378691000 | -1.381639000 |
| H | -1.126035000 | -1.736045000 | 2.866906000  | C                | 1.131083000  | -1.665707000 | -1.666456000 |
| H | -0.294342000 | -2.796076000 | 1.742796000  | C                | -1.013121000 | -2.722626000 | -1.066865000 |
| O | 0.747677000  | 1.298362000  | -0.810091000 | C                | -1.128605000 | -3.663361000 | -2.277105000 |
| O | -0.341324000 | 0.671397000  | 1.951168000  | C                | -1.786098000 | -2.998891000 | -3.488714000 |
| C | -1.037825000 | 1.474320000  | 2.746206000  | C                | -1.016501000 | -1.728355000 | -3.859276000 |
| O | -2.071363000 | 2.040451000  | 2.428834000  | C                | -0.936655000 | -0.786490000 | -2.658635000 |
| C | -0.403897000 | 1.607159000  | 4.115098000  | C                | -3.270745000 | 0.441417000  | 0.345658000  |
| H | -0.945961000 | 2.339104000  | 4.713240000  | C                | -4.484224000 | 1.119041000  | 0.167722000  |
| H | -0.422259000 | 0.635356000  | 4.618114000  | C                | -4.472681000 | 2.261554000  | -0.633293000 |
| H | 0.644313000  | 1.903316000  | 4.020116000  | C                | -3.299741000 | 2.715609000  | -1.244527000 |
| O | 1.637336000  | 3.009958000  | -1.648523000 | C                | -2.147850000 | 1.972761000  | -1.014955000 |
| C | 4.813758000  | 0.213399000  | -1.969702000 | C                | -3.265481000 | 3.935403000  | -2.123794000 |
| C | 3.586628000  | 0.853348000  | -1.818862000 | C                | -5.749361000 | 0.645647000  | 0.834023000  |
| C | 3.197919000  | 1.366034000  | -0.570792000 | C                | -3.151407000 | -0.751818000 | 1.258616000  |

|   |              |              |              |                 |              |              |              |
|---|--------------|--------------|--------------|-----------------|--------------|--------------|--------------|
| C | -2.342804000 | -2.384450000 | -0.373857000 | H               | -0.883619000 | 2.262340000  | 4.760264000  |
| C | -3.256329000 | -3.585605000 | -0.076778000 | H               | -0.427444000 | 0.541333000  | 4.615794000  |
| C | -2.718714000 | -4.476704000 | 1.046765000  | H               | 0.707752000  | 1.786476000  | 4.097481000  |
| C | -2.480420000 | -3.633400000 | 2.303975000  | O               | 1.877540000  | 2.981102000  | -1.646174000 |
| C | -1.544268000 | -2.468581000 | 1.984880000  | C               | 4.831715000  | -0.070712000 | -1.932006000 |
| H | 4.469922000  | -3.280743000 | 1.200087000  | C               | 3.659320000  | 0.668358000  | -1.799278000 |
| H | 1.346874000  | -0.723674000 | 2.682790000  | C               | 3.291156000  | 1.205293000  | -0.554942000 |
| H | 4.594182000  | -1.500474000 | 3.492733000  | C               | 4.110677000  | 0.973340000  | 0.554685000  |
| H | 3.854854000  | -3.069383000 | 3.819507000  | C               | 5.274244000  | 0.213478000  | 0.423358000  |
| H | 2.997271000  | -1.577890000 | 4.254208000  | C               | 5.640187000  | -0.305681000 | -0.817252000 |
| H | 2.907766000  | -4.137722000 | -1.769320000 | H               | 5.109391000  | -0.466181000 | -2.903271000 |
| H | 4.517217000  | -3.879594000 | -1.081220000 | H               | 3.037515000  | 0.822795000  | -2.675903000 |
| H | 3.834374000  | -2.695129000 | -2.200715000 | H               | 3.850128000  | 1.370269000  | 1.527607000  |
| H | 1.543252000  | -0.783180000 | -2.156732000 | H               | 5.893620000  | 0.032295000  | 1.295360000  |
| H | 1.279890000  | -2.511575000 | -2.336139000 | H               | 6.547457000  | -0.892041000 | -0.917184000 |
| H | -0.354693000 | -3.197242000 | -0.337796000 | C               | 2.005440000  | 1.991827000  | -0.427773000 |
| H | -0.127978000 | -4.009427000 | -2.553965000 | H               | 2.644361000  | 2.995543000  | -2.244456000 |
| H | -1.667785000 | -4.560308000 | -1.966861000 | H               | 1.047152000  | 2.184767000  | -1.810082000 |
| H | -1.801213000 | -3.697355000 | -4.329964000 | C               | 1.847227000  | 2.824720000  | 0.832853000  |
| H | -2.830724000 | -2.746796000 | -3.267741000 | H               | 2.754666000  | 3.411558000  | 0.986523000  |
| H | -1.513096000 | -1.187241000 | -4.670100000 | H               | 1.763395000  | 2.120422000  | 1.663430000  |
| H | -0.013134000 | -1.982699000 | -4.218303000 | C               | 0.612921000  | 3.733299000  | 0.846904000  |
| H | -0.348276000 | 0.104629000  | -2.880498000 | H               | -0.297071000 | 3.181644000  | 0.620280000  |
| H | -1.940941000 | -0.461810000 | -2.390778000 | H               | 0.501790000  | 4.132422000  | 1.861098000  |
| H | -5.397349000 | 2.812094000  | -0.780538000 | C               | 0.668139000  | 4.927693000  | -0.077431000 |
| H | -1.200102000 | 2.260610000  | -1.445887000 | O               | 1.823873000  | 5.615610000  | 0.035071000  |
| H | -4.026561000 | 4.656811000  | -1.816674000 | H               | 1.788100000  | 6.376595000  | -0.567110000 |
| H | -3.468052000 | 3.662952000  | -3.165657000 | O               | -0.232175000 | 5.279738000  | -0.809452000 |
| H | -2.286928000 | 4.418633000  | -2.080638000 | <sup>3</sup> PC |              |              |              |
| H | -6.023839000 | -0.359922000 | 0.497458000  | Mn              | -0.646363000 | 0.029791000  | 0.328867000  |
| H | -6.577690000 | 1.316726000  | 0.600662000  | N               | -0.210912000 | -1.884918000 | 0.946169000  |
| H | -5.638285000 | 0.609164000  | 1.922330000  | N               | -1.025307000 | -1.055047000 | -1.435574000 |
| H | -2.976658000 | -0.391331000 | 2.276963000  | N               | -1.045671000 | 1.857483000  | -0.369117000 |
| H | -4.092421000 | -1.306549000 | 1.279234000  | N               | -2.709678000 | -0.000185000 | 0.540605000  |
| H | -2.899542000 | -1.703410000 | -1.020488000 | C               | 0.086529000  | -2.741619000 | -0.046003000 |
| H | -4.237859000 | -3.197506000 | 0.216108000  | C               | 0.530889000  | -4.044522000 | 0.211989000  |
| H | -3.428444000 | -4.150883000 | -0.994952000 | C               | 0.650547000  | -4.422534000 | 1.549563000  |
| H | -3.430119000 | -5.281979000 | 1.251452000  | C               | 0.334897000  | -3.539055000 | 2.588015000  |
| H | -1.780022000 | -4.956205000 | 0.740245000  | C               | -0.094228000 | -2.265215000 | 2.229126000  |
| H | -2.029399000 | -4.232165000 | 3.101263000  | C               | 0.451049000  | -3.938152000 | 4.033628000  |
| H | -3.435723000 | -3.257421000 | 2.689080000  | C               | 0.872336000  | -4.985623000 | -0.912346000 |
| H | -1.391584000 | -1.817286000 | 2.847577000  | C               | -0.057038000 | -2.187203000 | -1.433914000 |
| H | -0.563244000 | -2.862698000 | 1.709913000  | C               | -2.441100000 | -1.587768000 | -1.302482000 |
| O | 0.863505000  | 1.304973000  | -0.845744000 | C               | -2.931201000 | -2.264533000 | -2.591310000 |
| O | -0.278740000 | 0.645551000  | 1.967392000  | C               | -2.758910000 | -1.388453000 | -3.834419000 |
| C | -0.945218000 | 1.476410000  | 2.758629000  | C               | -1.297414000 | -0.947790000 | -3.954887000 |
| O | -1.919027000 | 2.127161000  | 2.418060000  | C               | -0.857294000 | -0.230350000 | -2.680717000 |
| C | -0.353988000 | 1.529710000  | 4.151965000  | C               | -2.249974000 | 2.340864000  | -0.012717000 |

|   |              |              |              |                 |              |              |              |
|---|--------------|--------------|--------------|-----------------|--------------|--------------|--------------|
| C | -2.647235000 | 3.639519000  | -0.347917000 | H               | -2.731582000 | -0.490496000 | 2.574418000  |
| C | -1.734145000 | 4.416296000  | -1.062296000 | H               | -2.684346000 | -1.873196000 | 1.494281000  |
| C | -0.473134000 | 3.924420000  | -1.419523000 | O               | 1.258158000  | 0.112373000  | -0.251058000 |
| C | -0.166609000 | 2.622541000  | -1.036504000 | O               | -0.435669000 | 0.602254000  | 2.104992000  |
| C | 0.514929000  | 4.759687000  | -2.187484000 | C               | -0.321368000 | 1.742553000  | 2.767920000  |
| C | -3.995276000 | 4.173578000  | 0.058198000  | O               | -0.196647000 | 2.840987000  | 2.248111000  |
| C | -3.091572000 | 1.414310000  | 0.817219000  | C               | -0.355851000 | 1.536407000  | 4.268260000  |
| C | -3.294327000 | -0.422951000 | -0.795540000 | H               | -0.250166000 | 2.489823000  | 4.785002000  |
| C | -4.807057000 | -0.680098000 | -0.718540000 | H               | -1.298883000 | 1.060460000  | 4.552684000  |
| C | -5.204221000 | -1.626665000 | 0.415572000  | H               | 0.450788000  | 0.860524000  | 4.567765000  |
| C | -4.664696000 | -1.084081000 | 1.741226000  | O               | 3.091219000  | 2.591903000  | -1.133350000 |
| C | -3.151077000 | -0.902407000 | 1.656661000  | C               | 4.070952000  | -0.759518000 | -3.162342000 |
| H | 0.995979000  | -5.424842000 | 1.786333000  | C               | 3.161515000  | -0.337234000 | -2.203121000 |
| H | -0.343491000 | -1.512756000 | 2.966171000  | C               | 3.417579000  | -0.556789000 | -0.830052000 |
| H | 1.447665000  | -4.335501000 | 4.247699000  | C               | 4.603806000  | -1.208832000 | -0.448197000 |
| H | -0.273417000 | -4.722218000 | 4.277078000  | C               | 5.502789000  | -1.645811000 | -1.417160000 |
| H | 0.268590000  | -3.088634000 | 4.695133000  | C               | 5.241296000  | -1.420991000 | -2.770209000 |
| H | -0.006830000 | -5.199440000 | -1.530118000 | H               | 3.874408000  | -0.573287000 | -4.212585000 |
| H | 1.247138000  | -5.932457000 | -0.520140000 | H               | 2.267236000  | 0.201816000  | -2.500144000 |
| H | 1.639046000  | -4.561019000 | -1.568107000 | H               | 4.820684000  | -1.393673000 | 0.595177000  |
| H | 0.905843000  | -1.811217000 | -1.785376000 | H               | 6.408773000  | -2.160050000 | -1.115556000 |
| H | -0.370006000 | -2.962253000 | -2.133938000 | H               | 5.949747000  | -1.756035000 | -3.520802000 |
| H | -2.396177000 | -2.351314000 | -0.525016000 | C               | 2.414466000  | -0.139761000 | 0.153636000  |
| H | -2.373714000 | -3.196678000 | -2.726927000 | H               | 3.831357000  | 2.349664000  | -1.701840000 |
| H | -3.971086000 | -2.567184000 | -2.451796000 | H               | 3.368178000  | 3.395489000  | -0.673943000 |
| H | -3.067565000 | -1.945775000 | -4.723093000 | C               | 2.724661000  | 0.010029000  | 1.620575000  |
| H | -3.406710000 | -0.504932000 | -3.774603000 | H               | 3.601317000  | -0.563137000 | 1.912533000  |
| H | -1.161938000 | -0.253383000 | -4.789283000 | H               | 1.866296000  | -0.368262000 | 2.176369000  |
| H | -0.654025000 | -1.811613000 | -4.155456000 | C               | 2.912629000  | 1.494668000  | 1.998923000  |
| H | 0.189507000  | 0.066959000  | -2.720279000 | H               | 2.106027000  | 2.110529000  | 1.599957000  |
| H | -1.445674000 | 0.677718000  | -2.559850000 | H               | 2.862248000  | 1.577169000  | 3.091111000  |
| H | -2.009160000 | 5.429708000  | -1.341330000 | C               | 4.216990000  | 2.147946000  | 1.600656000  |
| H | 0.802793000  | 2.190203000  | -1.250053000 | O               | 5.231573000  | 1.277271000  | 1.446372000  |
| H | 0.113523000  | 5.020572000  | -3.172316000 | H               | 6.035377000  | 1.774255000  | 1.220879000  |
| H | 1.455090000  | 4.223016000  | -2.325403000 | O               | 4.360153000  | 3.347085000  | 1.474622000  |
| H | 0.722375000  | 5.696181000  | -1.660802000 | <sup>5</sup> PC |              |              |              |
| H | -4.805658000 | 3.585152000  | -0.385442000 | Mn              | -0.572066000 | -0.138428000 | 0.315578000  |
| H | -4.112008000 | 5.208200000  | -0.268804000 | N               | 0.857321000  | -1.558908000 | 0.705418000  |
| H | -4.124191000 | 4.144286000  | 1.144860000  | N               | -0.685458000 | -1.274733000 | -1.461632000 |
| H | -2.915930000 | 1.613559000  | 1.877873000  | N               | -1.924405000 | 1.290860000  | -0.238052000 |
| H | -4.154821000 | 1.576007000  | 0.636639000  | N               | -2.512369000 | -1.162422000 | 0.748760000  |
| H | -3.144882000 | 0.428223000  | -1.461028000 | C               | 1.321263000  | -2.211000000 | -0.377573000 |
| H | -5.313052000 | 0.280012000  | -0.576160000 | C               | 2.374391000  | -3.127570000 | -0.282328000 |
| H | -5.146971000 | -1.045712000 | -1.689716000 | C               | 2.932773000  | -3.322912000 | 0.981299000  |
| H | -6.292980000 | -1.722224000 | 0.450493000  | C               | 2.454781000  | -2.646266000 | 2.109856000  |
| H | -4.803412000 | -2.632361000 | 0.236776000  | C               | 1.395434000  | -1.767165000 | 1.920330000  |
| H | -4.870999000 | -1.773662000 | 2.565157000  | C               | 3.076774000  | -2.831201000 | 3.465639000  |
| H | -5.155354000 | -0.136475000 | 1.990816000  | C               | 2.885848000  | -3.856857000 | -1.495011000 |

|   |              |              |              |                                                                 |              |              |              |
|---|--------------|--------------|--------------|-----------------------------------------------------------------|--------------|--------------|--------------|
| C | 0.683924000  | -1.830615000 | -1.678167000 | H                                                               | -3.279034000 | -0.982623000 | -1.181422000 |
| C | -1.673484000 | -2.406804000 | -1.191739000 | H                                                               | -4.993237000 | -2.167529000 | -0.096249000 |
| C | -1.929969000 | -3.237997000 | -2.458869000 | H                                                               | -4.351927000 | -3.239106000 | -1.309478000 |
| C | -2.351558000 | -2.385040000 | -3.657997000 | H                                                               | -4.757441000 | -4.420590000 | 0.871876000  |
| C | -1.305028000 | -1.297708000 | -3.917764000 | H                                                               | -3.046027000 | -4.469338000 | 0.472963000  |
| C | -1.090325000 | -0.457326000 | -2.660229000 | H                                                               | -3.283197000 | -3.788612000 | 2.849719000  |
| C | -3.161046000 | 1.161536000  | 0.274566000  | H                                                               | -4.395453000 | -2.499348000 | 2.403209000  |
| C | -4.135682000 | 2.145618000  | 0.060364000  | H                                                               | -2.089988000 | -1.583956000 | 2.753087000  |
| C | -3.768955000 | 3.256971000  | -0.698637000 | H                                                               | -1.448403000 | -2.753094000 | 1.614000000  |
| C | -2.481855000 | 3.392122000  | -1.233169000 | O                                                               | 1.184054000  | 1.115364000  | -0.516061000 |
| C | -1.582251000 | 2.368845000  | -0.965635000 | O                                                               | -0.369068000 | 0.497427000  | 2.071891000  |
| C | -2.080922000 | 4.587863000  | -2.051951000 | C                                                               | -0.819174000 | 1.483566000  | 2.842222000  |
| C | -5.520593000 | 2.011992000  | 0.635772000  | O                                                               | -1.441733000 | 2.447167000  | 2.429446000  |
| C | -3.425529000 | -0.062238000 | 1.117514000  | C                                                               | -0.459003000 | 1.280054000  | 4.297434000  |
| C | -2.931187000 | -1.798693000 | -0.545814000 | H                                                               | -0.832296000 | 2.109164000  | 4.897594000  |
| C | -4.112226000 | -2.764363000 | -0.355982000 | H                                                               | -0.887151000 | 0.338523000  | 4.653411000  |
| C | -3.868072000 | -3.796164000 | 0.748620000  | H                                                               | 0.627274000  | 1.204793000  | 4.402552000  |
| C | -3.528971000 | -3.075391000 | 2.057177000  | O                                                               | 5.284004000  | 3.097750000  | -1.129212000 |
| C | -2.329512000 | -2.151937000 | 1.852729000  | C                                                               | 4.708937000  | -0.793026000 | -1.865823000 |
| H | 3.762814000  | -4.015044000 | 1.087522000  | C                                                               | 3.620571000  | 0.013803000  | -1.549032000 |
| H | 0.963771000  | -1.192322000 | 2.729243000  | C                                                               | 3.419969000  | 0.433937000  | -0.221768000 |
| H | 4.105440000  | -2.455545000 | 3.463819000  | C                                                               | 4.319403000  | 0.037810000  | 0.781141000  |
| H | 3.113979000  | -3.890104000 | 3.737123000  | C                                                               | 5.378754000  | -0.809141000 | 0.465209000  |
| H | 2.518647000  | -2.294684000 | 4.235395000  | C                                                               | 5.577724000  | -1.219500000 | -0.855045000 |
| H | 2.116521000  | -4.516612000 | -1.910453000 | H                                                               | 4.879441000  | -1.092361000 | -2.894238000 |
| H | 3.752480000  | -4.467164000 | -1.236566000 | H                                                               | 2.947213000  | 0.363881000  | -2.323666000 |
| H | 3.186192000  | -3.159347000 | -2.281487000 | H                                                               | 4.173143000  | 0.356974000  | 1.806724000  |
| H | 1.283545000  | -1.052529000 | -2.153752000 | H                                                               | 6.052859000  | -1.141813000 | 1.246826000  |
| H | 0.653297000  | -2.675295000 | -2.365124000 | H                                                               | 6.414299000  | -1.865272000 | -1.100018000 |
| H | -1.181540000 | -3.050860000 | -0.460501000 | C                                                               | 2.251597000  | 1.272308000  | 0.100004000  |
| H | -1.020068000 | -3.792349000 | -2.708701000 | H                                                               | 5.237899000  | 2.197533000  | -1.469884000 |
| H | -2.675360000 | -4.000348000 | -2.225421000 | H                                                               | 4.362832000  | 3.402327000  | -1.088710000 |
| H | -2.468237000 | -3.022000000 | -4.538968000 | C                                                               | 2.359758000  | 2.294183000  | 1.207143000  |
| H | -3.327616000 | -1.920096000 | -3.472697000 | H                                                               | 3.394030000  | 2.633194000  | 1.289057000  |
| H | -1.628775000 | -0.620620000 | -4.713585000 | H                                                               | 2.124631000  | 1.772942000  | 2.143883000  |
| H | -0.362509000 | -1.746185000 | -4.249707000 | C                                                               | 1.407544000  | 3.472928000  | 1.038733000  |
| H | -0.317207000 | 0.299992000  | -2.800267000 | H                                                               | 0.361884000  | 3.157012000  | 1.011566000  |
| H | -2.016132000 | 0.057887000  | -2.412447000 | H                                                               | 1.492281000  | 4.149962000  | 1.894114000  |
| H | -4.505351000 | 4.033678000  | -0.883653000 | C                                                               | 1.689123000  | 4.265439000  | -0.212680000 |
| H | -0.566892000 | 2.389418000  | -1.339716000 | O                                                               | 0.835568000  | 5.287734000  | -0.362817000 |
| H | -1.959444000 | 5.467341000  | -1.411380000 | H                                                               | 1.059203000  | 5.770470000  | -1.176142000 |
| H | -2.846954000 | 4.822735000  | -2.796002000 | O                                                               | 2.570158000  | 4.027994000  | -1.018776000 |
| H | -1.135715000 | 4.414302000  | -2.570204000 | <b>Part V. Alcohol oxidation of 4-OH-PBA by the</b>             |              |              |              |
| H | -6.029283000 | 1.123499000  | 0.246940000  | <b>Mn<sup>IV</sup>(O)(AcO•) species 2 via the DHA and R-DHA</b> |              |              |              |
| H | -6.124765000 | 2.884573000  | 0.382394000  | <b>mechanisms.</b>                                              |              |              |              |
| H | -5.491803000 | 1.923660000  | 1.726347000  | <sup>3</sup> TS <sub>DHA</sub>                                  |              |              |              |
| H | -3.255688000 | 0.189532000  | 2.169025000  | Mn                                                              | 0.626855000  | 0.053406000  | -0.106534000 |
| H | -4.473390000 | -0.359382000 | 1.032140000  | N                                                               | 0.585280000  | 2.056350000  | -0.434882000 |

|   |              |              |              |   |              |              |              |
|---|--------------|--------------|--------------|---|--------------|--------------|--------------|
| N | 2.471539000  | 0.281761000  | -1.101742000 | H | 0.507929000  | -5.622146000 | 1.310204000  |
| N | 0.691629000  | -1.941184000 | 0.261207000  | H | 0.104187000  | -2.502068000 | -1.624234000 |
| N | 1.856496000  | 0.009278000  | 1.632183000  | H | -0.949779000 | -5.887523000 | -0.949775000 |
| C | 1.435044000  | 2.494540000  | -1.381979000 | H | 0.690334000  | -5.888228000 | -1.598142000 |
| C | 1.479446000  | 3.843289000  | -1.760350000 | H | -0.512946000 | -4.759624000 | -2.247903000 |
| C | 0.601137000  | 4.714710000  | -1.114439000 | H | 2.330022000  | -3.742824000 | 3.608289000  |
| C | -0.288070000 | 4.263204000  | -0.131881000 | H | 1.165863000  | -5.071771000 | 3.520297000  |
| C | -0.256805000 | 2.906996000  | 0.174482000  | H | 0.651669000  | -3.474645000 | 4.082878000  |
| C | -1.242578000 | 5.194993000  | 0.564565000  | H | 0.486688000  | -0.822043000 | 2.987656000  |
| C | 2.431023000  | 4.326899000  | -2.822644000 | H | 2.110125000  | -1.460600000 | 3.166707000  |
| C | 2.283503000  | 1.432082000  | -2.029684000 | H | 3.268865000  | -1.293762000 | 0.808656000  |
| C | 3.501288000  | 0.654403000  | -0.055326000 | H | 4.149304000  | -0.975868000 | 2.976985000  |
| C | 4.931932000  | 0.661115000  | -0.617970000 | H | 5.297738000  | -0.284911000 | 1.868379000  |
| C | 5.294254000  | -0.629304000 | -1.356786000 | H | 4.911441000  | 1.180387000  | 3.881618000  |
| C | 4.264284000  | -0.893444000 | -2.458860000 | H | 4.449427000  | 2.022722000  | 2.408865000  |
| C | 2.861082000  | -0.951059000 | -1.859681000 | H | 2.639650000  | 2.316438000  | 4.078353000  |
| C | 1.003801000  | -2.289331000 | 1.519857000  | H | 2.544932000  | 0.580083000  | 4.335988000  |
| C | 0.953175000  | -3.622857000 | 1.947993000  | H | 0.730258000  | 1.348851000  | 2.773215000  |
| C | 0.564775000  | -4.579521000 | 1.009736000  | H | 1.939497000  | 2.108022000  | 1.753604000  |
| C | 0.252590000  | -4.222564000 | -0.307242000 | O | -0.261865000 | -0.253616000 | -1.708264000 |
| C | 0.333318000  | -2.873053000 | -0.633900000 | O | -0.865079000 | 0.258305000  | 1.142757000  |
| C | -0.154817000 | -5.242488000 | -1.336207000 | C | -1.864675000 | -0.481746000 | 1.506669000  |
| C | 1.292557000  | -3.998674000 | 3.366381000  | O | -2.293837000 | -1.459380000 | 0.882997000  |
| C | 1.367156000  | -1.149308000 | 2.430719000  | C | -2.501529000 | -0.059534000 | 2.820199000  |
| C | 3.265513000  | -0.258117000 | 1.152829000  | H | -3.547875000 | -0.364984000 | 2.852263000  |
| C | 4.298465000  | -0.140897000 | 2.284714000  | H | -1.974777000 | -0.562403000 | 3.639567000  |
| C | 4.191950000  | 1.175932000  | 3.057789000  | H | -2.415002000 | 1.016859000  | 2.974430000  |
| C | 2.764026000  | 1.347701000  | 3.584732000  | O | -2.938555000 | 0.690106000  | -1.476622000 |
| C | 1.763312000  | 1.273828000  | 2.433240000  | C | -4.954407000 | 2.490483000  | 1.553983000  |
| H | 0.610732000  | 5.767452000  | -1.382764000 | C | -4.274962000 | 1.886649000  | 0.508868000  |
| H | -0.903169000 | 2.462201000  | 0.920394000  | C | -4.611806000 | 0.571448000  | 0.107093000  |
| H | -1.937346000 | 5.644853000  | -0.151927000 | C | -5.647152000 | -0.114792000 | 0.777224000  |
| H | -0.702356000 | 6.012070000  | 1.052775000  | C | -6.325148000 | 0.501553000  | 1.820612000  |
| H | -1.827072000 | 4.669330000  | 1.323110000  | C | -5.979458000 | 1.799002000  | 2.211237000  |
| H | 3.472484000  | 4.153736000  | -2.530777000 | H | -4.690210000 | 3.496222000  | 1.860814000  |
| H | 2.303300000  | 5.397059000  | -2.994549000 | H | -3.480893000 | 2.414138000  | -0.003407000 |
| H | 2.266466000  | 3.808288000  | -3.772489000 | H | -5.920798000 | -1.123103000 | 0.496111000  |
| H | 1.792427000  | 1.059979000  | -2.933939000 | H | -7.118934000 | -0.028772000 | 2.334047000  |
| H | 3.241713000  | 1.844100000  | -2.349028000 | H | -6.508450000 | 2.272654000  | 3.031687000  |
| H | 3.261880000  | 1.677840000  | 0.238481000  | C | -3.864220000 | -0.040284000 | -0.964000000 |
| H | 5.030526000  | 1.506399000  | -1.306954000 | H | -2.452145000 | 0.244445000  | -2.212694000 |
| H | 5.628842000  | 0.869508000  | 0.196499000  | H | -0.229160000 | 0.496903000  | -2.311074000 |
| H | 6.300173000  | -0.543857000 | -1.777705000 | C | -4.167969000 | -1.386197000 | -1.550178000 |
| H | 5.313237000  | -1.477243000 | -0.660333000 | H | -4.794502000 | -1.191466000 | -2.432332000 |
| H | 4.457340000  | -1.847286000 | -2.959308000 | H | -4.786819000 | -1.941823000 | -0.851267000 |
| H | 4.326153000  | -0.114768000 | -3.228130000 | C | -2.961484000 | -2.277039000 | -1.911329000 |
| H | 2.089231000  | -1.106632000 | -2.614318000 | H | -2.225962000 | -2.208510000 | -1.102099000 |
| H | 2.804138000  | -1.789502000 | -1.165549000 | H | -3.296096000 | -3.315130000 | -1.951697000 |

|                                |              |              |              |   |              |              |              |
|--------------------------------|--------------|--------------|--------------|---|--------------|--------------|--------------|
| C                              | -2.231618000 | -2.010773000 | -3.200159000 | H | 5.553312000  | -1.342362000 | -0.430430000 |
| O                              | -2.431552000 | -0.744538000 | -3.669211000 | H | 6.466248000  | -0.071144000 | 1.538781000  |
| H                              | -1.891155000 | -0.600557000 | -4.464050000 | H | 5.485650000  | 0.988924000  | 0.536170000  |
| O                              | -1.516451000 | -2.797646000 | -3.769318000 | H | 4.826661000  | 1.319678000  | 2.905121000  |
| <sup>5</sup> TS <sub>DHA</sub> |              |              |              | H | 4.578520000  | -0.410408000 | 3.112991000  |
| Mn                             | 0.545114000  | -0.000291000 | 0.144486000  | H | 2.386803000  | 0.746324000  | 2.727396000  |
| N                              | 0.408052000  | -2.102202000 | 0.458693000  | H | 3.021839000  | 1.468365000  | 1.263489000  |
| N                              | 2.562347000  | -0.573106000 | 1.116462000  | H | 1.073636000  | 5.720345000  | -1.156818000 |
| N                              | 0.850089000  | 2.035201000  | -0.170457000 | H | 0.324928000  | 2.618839000  | 1.728906000  |
| N                              | 1.786987000  | -0.028403000 | -1.597268000 | H | -0.277628000 | 6.163253000  | 1.078793000  |
| C                              | 1.261605000  | -2.660329000 | 1.330854000  | H | 1.294739000  | 5.859033000  | 1.818876000  |
| C                              | 1.181140000  | -4.022655000 | 1.659238000  | H | -0.121338000 | 4.935454000  | 2.351755000  |
| C                              | 0.178179000  | -4.771316000 | 1.042144000  | H | 2.667579000  | 3.682565000  | -3.497961000 |
| C                              | -0.713921000 | -4.191649000 | 0.132720000  | H | 1.680381000  | 5.145091000  | -3.371982000 |
| C                              | -0.554377000 | -2.834963000 | -0.126730000 | H | 0.966493000  | 3.639579000  | -3.967647000 |
| C                              | -1.805878000 | -4.985664000 | -0.532028000 | H | 0.469239000  | 0.979576000  | -2.881592000 |
| C                              | 2.135322000  | -4.651217000 | 2.640648000  | H | 2.146366000  | 1.435895000  | -3.117939000 |
| C                              | 2.280429000  | -1.741258000 | 1.968629000  | H | 3.352736000  | 1.072089000  | -0.748896000 |
| C                              | 3.463426000  | -0.948954000 | -0.021363000 | H | 4.092129000  | 0.804477000  | -2.992193000 |
| C                              | 4.925242000  | -1.108300000 | 0.431617000  | H | 5.225571000  | -0.032627000 | -1.975191000 |
| C                              | 5.443624000  | 0.113023000  | 1.196511000  | H | 4.621884000  | -1.364463000 | -4.028503000 |
| C                              | 4.520514000  | 0.407083000  | 2.384156000  | H | 4.163754000  | -2.232642000 | -2.570033000 |
| C                              | 3.081064000  | 0.583227000  | 1.900804000  | H | 2.256153000  | -2.311390000 | -4.143114000 |
| C                              | 1.193453000  | 2.360027000  | -1.427351000 | H | 2.298899000  | -0.567458000 | -4.349630000 |
| C                              | 1.293424000  | 3.697030000  | -1.832802000 | H | 0.494080000  | -1.219123000 | -2.729539000 |
| C                              | 1.014254000  | 4.673013000  | -0.873708000 | H | 1.667578000  | -2.120820000 | -1.787485000 |
| C                              | 0.661001000  | 4.336132000  | 0.438479000  | O | -0.251956000 | 0.351587000  | 1.770364000  |
| C                              | 0.594421000  | 2.980530000  | 0.744306000  | O | -1.047112000 | -0.140549000 | -1.208596000 |
| C                              | 0.369078000  | 5.379113000  | 1.482709000  | C | -1.954354000 | 0.685385000  | -1.607769000 |
| C                              | 1.671550000  | 4.061281000  | -3.244141000 | O | -2.298675000 | 1.705910000  | -0.990722000 |
| C                              | 1.402280000  | 1.197922000  | -2.357868000 | C | -2.607664000 | 0.320519000  | -2.931320000 |
| C                              | 3.237376000  | 0.066223000  | -1.155994000 | H | -3.415136000 | 1.010449000  | -3.175257000 |
| C                              | 4.199925000  | -0.072972000 | -2.346999000 | H | -1.858684000 | 0.340049000  | -3.729908000 |
| C                              | 3.946124000  | -1.339254000 | -3.168808000 | H | -2.996583000 | -0.699902000 | -2.879055000 |
| C                              | 2.485747000  | -1.372560000 | -3.629861000 | O | -2.947883000 | -0.561983000 | 1.580744000  |
| C                              | 1.542198000  | -1.252499000 | -2.434000000 | C | -5.000195000 | -2.403303000 | -1.404511000 |
| H                              | 0.094050000  | -5.829934000 | 1.271829000  | C | -4.316081000 | -1.787646000 | -0.369308000 |
| H                              | -1.187998000 | -2.295669000 | -0.820189000 | C | -4.551360000 | -0.422798000 | -0.073274000 |
| H                              | -2.612396000 | -5.204653000 | 0.176427000  | C | -5.487707000 | 0.301569000  | -0.842229000 |
| H                              | -1.425958000 | -5.942599000 | -0.900419000 | C | -6.169925000 | -0.325633000 | -1.875863000 |
| H                              | -2.234725000 | -4.438890000 | -1.375093000 | C | -5.928102000 | -1.673217000 | -2.158439000 |
| H                              | 3.168978000  | -4.595356000 | 2.282278000  | H | -4.819461000 | -3.448985000 | -1.626490000 |
| H                              | 1.888707000  | -5.703314000 | 2.793857000  | H | -3.602598000 | -2.345546000 | 0.223020000  |
| H                              | 2.098837000  | -4.149116000 | 3.612573000  | H | -5.675254000 | 1.349091000  | -0.648577000 |
| H                              | 1.891486000  | -1.381577000 | 2.927854000  | H | -6.885410000 | 0.234986000  | -2.466290000 |
| H                              | 3.187624000  | -2.302920000 | 2.205963000  | H | -6.461709000 | -2.157078000 | -2.969866000 |
| H                              | 3.119346000  | -1.926506000 | -0.364482000 | C | -3.815499000 | 0.191605000  | 1.003460000  |
| H                              | 4.984470000  | -1.986752000 | 1.083303000  | H | -2.489307000 | -0.117108000 | 2.337711000  |



|                                |              |              |              |   |              |              |              |
|--------------------------------|--------------|--------------|--------------|---|--------------|--------------|--------------|
| H                              | -0.107866000 | -0.330725000 | 2.435978000  | H | -2.408747000 | -3.564097000 | 2.661826000  |
| C                              | -4.068987000 | 1.573484000  | 1.525922000  | H | -4.057190000 | -3.338391000 | 2.059915000  |
| H                              | -4.713159000 | 1.444239000  | 2.407320000  | H | -3.245795000 | -2.032307000 | 2.934056000  |
| H                              | -4.655063000 | 2.124353000  | 0.796272000  | H | -0.897621000 | -0.283923000 | 2.486704000  |
| C                              | -2.830073000 | 2.427820000  | 1.866458000  | H | -0.661677000 | -1.994828000 | 2.830313000  |
| H                              | -2.095995000 | 2.311470000  | 1.061372000  | H | 0.759967000  | -2.938966000 | 0.751460000  |
| H                              | -3.126699000 | 3.478386000  | 1.871105000  | H | 0.812377000  | -3.518750000 | 3.039924000  |
| C                              | -2.122778000 | 2.178917000  | 3.170817000  | H | 2.270089000  | -4.150216000 | 2.331317000  |
| O                              | -2.394925000 | 0.946430000  | 3.695395000  | H | 2.689522000  | -3.058594000 | 4.561633000  |
| H                              | -1.872828000 | 0.810444000  | 4.503858000  | H | 3.585679000  | -2.232372000 | 3.295020000  |
| O                              | -1.373311000 | 2.950864000  | 3.714725000  | H | 2.451521000  | -0.523035000 | 4.684058000  |
| <sup>3</sup> TS <sub>1OH</sub> |              |              |              | H | 0.905186000  | -1.337491000 | 4.495416000  |
| Mn                             | 0.751743000  | 0.139762000  | -0.194510000 | H | 1.080559000  | 0.605904000  | 2.911859000  |
| N                              | -0.928803000 | -1.072817000 | -0.317164000 | H | 2.596647000  | -0.036199000 | 2.300222000  |
| N                              | 0.873429000  | -1.061781000 | 1.669039000  | H | 5.943587000  | 2.867103000  | 0.029960000  |
| N                              | 2.564018000  | 1.087352000  | -0.056525000 | H | 1.777015000  | 2.610009000  | 1.077718000  |
| N                              | 2.244087000  | -1.494744000 | -0.827479000 | H | 4.375896000  | 5.024612000  | 0.782905000  |
| C                              | -1.384004000 | -1.565647000 | 0.852508000  | H | 4.723574000  | 4.123718000  | 2.259706000  |
| C                              | -2.562661000 | -2.319907000 | 0.906211000  | H | 3.048435000  | 4.530320000  | 1.848857000  |
| C                              | -3.222829000 | -2.565061000 | -0.300919000 | H | 6.283913000  | -0.425631000 | -1.047321000 |
| C                              | -2.735914000 | -2.077305000 | -1.516817000 | H | 6.921083000  | 1.201743000  | -1.317636000 |
| C                              | -1.575238000 | -1.310151000 | -1.470279000 | H | 5.834177000  | 0.466422000  | -2.503812000 |
| C                              | -3.415664000 | -2.365138000 | -2.826559000 | H | 2.987571000  | -0.455971000 | -2.485083000 |
| C                              | -3.098146000 | -2.841194000 | 2.212392000  | H | 4.235589000  | -1.314810000 | -1.590174000 |
| C                              | -0.554578000 | -1.230262000 | 2.060484000  | H | 3.359834000  | -1.394752000 | 0.936272000  |
| C                              | 1.504161000  | -2.399097000 | 1.338758000  | H | 4.545813000  | -3.020911000 | -0.289013000 |
| C                              | 1.774338000  | -3.218782000 | 2.611854000  | H | 3.896819000  | -3.832251000 | 1.106862000  |
| C                              | 2.574380000  | -2.445770000 | 3.663168000  | H | 3.633896000  | -5.197378000 | -0.990109000 |
| C                              | 1.858856000  | -1.132937000 | 3.995750000  | H | 2.057030000  | -4.813689000 | -0.313611000 |
| C                              | 1.632114000  | -0.315976000 | 2.724473000  | H | 1.998218000  | -4.346500000 | -2.748699000 |
| C                              | 3.609992000  | 0.543796000  | -0.712562000 | H | 3.435828000  | -3.340525000 | -2.627195000 |
| C                              | 4.864544000  | 1.166066000  | -0.703375000 | H | 1.360117000  | -1.922017000 | -2.671900000 |
| C                              | 4.981036000  | 2.364242000  | 0.003993000  | H | 0.711924000  | -2.844093000 | -1.324711000 |
| C                              | 3.892371000  | 2.931988000  | 0.674720000  | O | -0.058074000 | 1.388094000  | 0.631661000  |
| C                              | 2.683863000  | 2.249097000  | 0.609092000  | O | 0.569684000  | 0.593739000  | -2.002300000 |
| C                              | 4.011340000  | 4.224759000  | 1.434557000  | C | 0.550895000  | 1.785806000  | -2.603308000 |
| C                              | 6.039350000  | 0.569405000  | -1.433699000 | O | 0.777154000  | 2.843475000  | -2.045477000 |
| C                              | 3.327534000  | -0.720041000 | -1.478930000 | C | 0.204934000  | 1.660669000  | -4.071841000 |
| C                              | 2.730575000  | -2.139789000 | 0.446127000  | H | 0.319391000  | 2.624806000  | -4.566657000 |
| C                              | 3.610059000  | -3.368935000 | 0.160733000  | H | 0.842733000  | 0.912139000  | -4.548252000 |
| C                              | 2.945080000  | -4.373090000 | -0.784502000 | H | -0.831179000 | 1.320856000  | -4.167593000 |
| C                              | 2.542179000  | -3.668699000 | -2.083909000 | O | -2.401249000 | 1.560435000  | 1.051569000  |
| C                              | 1.635898000  | -2.477843000 | -1.774241000 | C | -5.982263000 | -0.595500000 | 1.105252000  |
| H                              | -4.140967000 | -3.144104000 | -0.288613000 | C | -4.864952000 | 0.221939000  | 1.125113000  |
| H                              | -1.137423000 | -0.867013000 | -2.355679000 | C | -4.348273000 | 0.733144000  | -0.083476000 |
| H                              | -4.497140000 | -2.438309000 | -2.696227000 | C | -5.004399000 | 0.450327000  | -1.304811000 |
| H                              | -3.062450000 | -3.317864000 | -3.235894000 | C | -6.120346000 | -0.371371000 | -1.319954000 |
| H                              | -3.204131000 | -1.586016000 | -3.562373000 | C | -6.612912000 | -0.896906000 | -0.116598000 |

|                                |              |              |              |   |              |              |              |
|--------------------------------|--------------|--------------|--------------|---|--------------|--------------|--------------|
| H                              | -6.369709000 | -1.010915000 | 2.028883000  | C | 3.982223000  | -1.989051000 | -2.477568000 |
| H                              | -4.357978000 | 0.454492000  | 2.053665000  | C | 2.605882000  | -1.418718000 | -2.136896000 |
| H                              | -4.611967000 | 0.853752000  | -2.232700000 | H | -2.470919000 | -4.798656000 | -1.134654000 |
| H                              | -6.610892000 | -0.606738000 | -2.257652000 | H | -0.646463000 | -1.277040000 | -2.791896000 |
| H                              | -7.490133000 | -1.534974000 | -0.125810000 | H | -3.240135000 | -3.619732000 | -3.491096000 |
| C                              | -3.103170000 | 1.538887000  | -0.102242000 | H | -1.713479000 | -4.419331000 | -3.869913000 |
| H                              | -1.283541000 | 1.536553000  | 0.844466000  | H | -1.930953000 | -2.705062000 | -4.260903000 |
| H                              | -2.472029000 | 1.270728000  | -0.968479000 | H | -0.719191000 | -4.770866000 | 1.882342000  |
| C                              | -3.511956000 | 3.086715000  | -0.500569000 | H | -2.269810000 | -5.251868000 | 1.178782000  |
| H                              | -4.269419000 | 3.399709000  | 0.216410000  | H | -2.168642000 | -3.816580000 | 2.208065000  |
| H                              | -3.945453000 | 3.033811000  | -1.498421000 | H | -0.797511000 | -1.248190000 | 2.097018000  |
| C                              | -2.285914000 | 3.987164000  | -0.483759000 | H | 0.206134000  | -2.683453000 | 2.273640000  |
| H                              | -1.436360000 | 3.550767000  | -1.014060000 | H | 1.961464000  | -2.567499000 | 0.238126000  |
| H                              | -2.555193000 | 4.907013000  | -1.021716000 | H | 2.204926000  | -3.352375000 | 2.453664000  |
| C                              | -1.801490000 | 4.429716000  | 0.879841000  | H | 3.811654000  | -3.126634000 | 1.826617000  |
| O                              | -2.809810000 | 4.631707000  | 1.754162000  | H | 3.577344000  | -2.271579000 | 4.184137000  |
| H                              | -2.430498000 | 4.946614000  | 2.590810000  | H | 4.019162000  | -0.963879000 | 3.095339000  |
| O                              | -0.643230000 | 4.649233000  | 1.159867000  | H | 2.161314000  | -0.179269000 | 4.531397000  |
| <sup>5</sup> TS1 <sub>OH</sub> |              |              |              | H | 1.192486000  | -1.586732000 | 4.120011000  |
| Mn                             | 0.505440000  | 0.215886000  | -0.389124000 | H | 0.488538000  | 0.401431000  | 2.755784000  |
| N                              | -0.383136000 | -1.616248000 | -0.777607000 | H | 2.148772000  | 0.622743000  | 2.229327000  |
| N                              | 1.136706000  | -0.995794000 | 1.344875000  | H | 3.723290000  | 5.015334000  | 0.650475000  |
| N                              | 1.621666000  | 1.886085000  | 0.019921000  | H | 0.160877000  | 2.673350000  | 1.231641000  |
| N                              | 2.635384000  | -0.404984000 | -1.041450000 | H | 1.224187000  | 6.029836000  | 1.449665000  |
| C                              | -0.609111000 | -2.382518000 | 0.306826000  | H | 1.995989000  | 5.253671000  | 2.833453000  |
| C                              | -1.369482000 | -3.554143000 | 0.220265000  | H | 0.342391000  | 4.805220000  | 2.379158000  |
| C                              | -1.872868000 | -3.897269000 | -1.036082000 | H | 5.651409000  | 2.476691000  | -0.723668000 |
| C                              | -1.625197000 | -3.110696000 | -2.166128000 | H | 5.425683000  | 4.230233000  | -0.772920000 |
| C                              | -0.869067000 | -1.958117000 | -1.980629000 | H | 4.883521000  | 3.227408000  | -2.125687000 |
| C                              | -2.155578000 | -3.479283000 | -3.524424000 | H | 2.834302000  | 1.083208000  | -2.498379000 |
| C                              | -1.646946000 | -4.394434000 | 1.438627000  | H | 4.310511000  | 0.813009000  | -1.578973000 |
| C                              | -0.045697000 | -1.864115000 | 1.599650000  | H | 3.502095000  | -0.025406000 | 0.818200000  |
| C                              | 2.339163000  | -1.826100000 | 0.943728000  | H | 5.364102000  | -0.720845000 | -0.442341000 |
| C                              | 2.921645000  | -2.582789000 | 2.149396000  | H | 5.135476000  | -1.923285000 | 0.795696000  |
| C                              | 3.218092000  | -1.671446000 | 3.343370000  | H | 5.634407000  | -2.953307000 | -1.444646000 |
| C                              | 1.953871000  | -0.899387000 | 3.734253000  | H | 4.044145000  | -3.453792000 | -0.886388000 |
| C                              | 1.416122000  | -0.125342000 | 2.532150000  | H | 3.855870000  | -2.746995000 | -3.256647000 |
| C                              | 2.825691000  | 2.001026000  | -0.577726000 | H | 4.627045000  | -1.207452000 | -2.896074000 |
| C                              | 3.624037000  | 3.133770000  | -0.371989000 | H | 2.130887000  | -0.942109000 | -2.996103000 |
| C                              | 3.122486000  | 4.128581000  | 0.469409000  | H | 1.951130000  | -2.231672000 | -1.818187000 |
| C                              | 1.870161000  | 4.011688000  | 1.082527000  | O | -0.862407000 | 0.753696000  | 0.445769000  |
| C                              | 1.144117000  | 2.857025000  | 0.817472000  | O | 0.193971000  | 0.786366000  | -2.167262000 |
| C                              | 1.323416000  | 5.081717000  | 1.987361000  | C | -0.450593000 | 1.833149000  | -2.641501000 |
| C                              | 4.969113000  | 3.274547000  | -1.035680000 | O | -0.873601000 | 2.756080000  | -1.948041000 |
| C                              | 3.223864000  | 0.875720000  | -1.496968000 | C | -0.653803000 | 1.790472000  | -4.137890000 |
| C                              | 3.324299000  | -0.906867000 | 0.199551000  | H | -0.511209000 | 2.789150000  | -4.555216000 |
| C                              | 4.695156000  | -1.526453000 | -0.121384000 | H | 0.013450000  | 1.074923000  | -4.617976000 |
| C                              | 4.627610000  | -2.587425000 | -1.223378000 | H | -1.694061000 | 1.497103000  | -4.313852000 |

|                                |              |              |              |   |              |              |              |
|--------------------------------|--------------|--------------|--------------|---|--------------|--------------|--------------|
| O                              | -3.082212000 | 0.036327000  | -0.599868000 | C | -2.178969000 | 2.084858000  | -1.747129000 |
| C                              | -2.253561000 | 0.764133000  | 3.579595000  | C | -3.128370000 | 3.673874000  | -3.455597000 |
| C                              | -2.771543000 | 0.856431000  | 2.292423000  | C | -5.683191000 | 2.272106000  | 0.693303000  |
| C                              | -3.622160000 | -0.181854000 | 1.768383000  | C | -3.289793000 | 0.622831000  | 1.451361000  |
| C                              | -4.021294000 | -1.235158000 | 2.609529000  | C | -3.116265000 | -1.614873000 | 0.425625000  |
| C                              | -3.496648000 | -1.323089000 | 3.886066000  | C | -4.195105000 | -2.358203000 | 1.231359000  |
| C                              | -2.610175000 | -0.318253000 | 4.377913000  | C | -3.667844000 | -2.930418000 | 2.549479000  |
| H                              | -1.612021000 | 1.547266000  | 3.965369000  | C | -3.038320000 | -1.810301000 | 3.383177000  |
| H                              | -2.579217000 | 1.734475000  | 1.689652000  | C | -1.941967000 | -1.107815000 | 2.583030000  |
| H                              | -4.679283000 | -2.008234000 | 2.229392000  | H | 3.529932000  | -3.545533000 | 1.685908000  |
| H                              | -3.740652000 | -2.169306000 | 4.518525000  | H | 1.273346000  | 0.049503000  | 2.361131000  |
| H                              | -2.238123000 | -0.394099000 | 5.393655000  | H | 4.436519000  | -1.202712000 | 3.064572000  |
| C                              | -4.088131000 | -0.121663000 | 0.351334000  | H | 3.424605000  | -2.235041000 | 4.076880000  |
| H                              | -2.211603000 | 0.361986000  | -0.202281000 | H | 3.044833000  | -0.509067000 | 3.913776000  |
| H                              | -4.653046000 | -1.024278000 | 0.091833000  | H | 1.295241000  | -5.029019000 | -0.432094000 |
| C                              | -5.123697000 | 1.091736000  | 0.257687000  | H | 3.042940000  | -4.913243000 | -0.175866000 |
| H                              | -4.719612000 | 1.961776000  | 0.775882000  | H | 2.307934000  | -4.148713000 | -1.585656000 |
| H                              | -6.041451000 | 0.785539000  | 0.763567000  | H | 0.669798000  | -1.701592000 | -2.100081000 |
| C                              | -5.397258000 | 1.443049000  | -1.206216000 | H | 0.058537000  | -3.291410000 | -1.644799000 |
| H                              | -5.777692000 | 0.587496000  | -1.767531000 | H | -1.373977000 | -2.860538000 | 0.588798000  |
| H                              | -6.175464000 | 2.217305000  | -1.219267000 | H | -1.704607000 | -4.395740000 | -1.173685000 |
| C                              | -4.194930000 | 1.988746000  | -1.952984000 | H | -3.208598000 | -4.305024000 | -0.305769000 |
| O                              | -3.481614000 | 2.863425000  | -1.226459000 | H | -3.546255000 | -4.289562000 | -2.801570000 |
| H                              | -2.601714000 | 3.006624000  | -1.651882000 | H | -4.165394000 | -2.806857000 | -2.089304000 |
| O                              | -3.927381000 | 1.707953000  | -3.105603000 | H | -2.803378000 | -2.206579000 | -4.069515000 |
| <sup>3</sup> IM1 <sub>OH</sub> |              |              |              | H | -1.446886000 | -3.153554000 | -3.475106000 |
| Mn                             | -0.674459000 | 0.238175000  | 0.043700000  | H | -1.111192000 | -0.717587000 | -2.974603000 |
| N                              | 0.769366000  | -1.089546000 | 0.714949000  | H | -2.685327000 | -0.667378000 | -2.188128000 |
| N                              | -1.169798000 | -1.636150000 | -1.095270000 | H | -5.208287000 | 3.553152000  | -1.666917000 |
| N                              | -2.260267000 | 1.367915000  | -0.612281000 | H | -1.248032000 | 1.998024000  | -2.292588000 |
| N                              | -2.422770000 | -0.570494000 | 1.270363000  | H | -3.281601000 | 4.740445000  | -3.265865000 |
| C                              | 0.989489000  | -2.175006000 | -0.056985000 | H | -3.897550000 | 3.352112000  | -4.164630000 |
| C                              | 1.968852000  | -3.115028000 | 0.283193000  | H | -2.151851000 | 3.543865000  | -3.925950000 |
| C                              | 2.747154000  | -2.846126000 | 1.409796000  | H | -6.150391000 | 1.286802000  | 0.792944000  |
| C                              | 2.545892000  | -1.700935000 | 2.188205000  | H | -6.419813000 | 2.952370000  | 0.263218000  |
| C                              | 1.518641000  | -0.845800000 | 1.805366000  | H | -5.439494000 | 2.626490000  | 1.699434000  |
| C                              | 3.405415000  | -1.391147000 | 3.381229000  | H | -2.850234000 | 1.240378000  | 2.240061000  |
| C                              | 2.164667000  | -4.369391000 | -0.526138000 | H | -4.288021000 | 0.335278000  | 1.783568000  |
| C                              | 0.164370000  | -2.260763000 | -1.308000000 | H | -3.619287000 | -1.065311000 | -0.371524000 |
| C                              | -2.034144000 | -2.505007000 | -0.203405000 | H | -5.007424000 | -1.655718000 | 1.443424000  |
| C                              | -2.552858000 | -3.735765000 | -0.967295000 | H | -4.637071000 | -3.131654000 | 0.600365000  |
| C                              | -3.247015000 | -3.374858000 | -2.282571000 | H | -4.487701000 | -3.402062000 | 3.098144000  |
| C                              | -2.302452000 | -2.547000000 | -3.158713000 | H | -2.923739000 | -3.714075000 | 2.359054000  |
| C                              | -1.828199000 | -1.306332000 | -2.400723000 | H | -2.585586000 | -2.203857000 | 4.297947000  |
| C                              | -3.356450000 | 1.417798000  | 0.176251000  | H | -3.805911000 | -1.091727000 | 3.692023000  |
| C                              | -4.456270000 | 2.207416000  | -0.177629000 | H | -1.504855000 | -0.268651000 | 3.125886000  |
| C                              | -4.367609000 | 2.934400000  | -1.366832000 | H | -1.138583000 | -1.815650000 | 2.375521000  |
| C                              | -3.227819000 | 2.888952000  | -2.176876000 | O | 0.411559000  | 0.809729000  | -1.248802000 |

|                               |              |              |              |   |              |              |              |
|-------------------------------|--------------|--------------|--------------|---|--------------|--------------|--------------|
| O                             | -0.313753000 | 1.428224000  | 1.437628000  | C | -3.248329000 | -3.373786000 | -2.283727000 |
| C                             | -0.080822000 | 2.742127000  | 1.431749000  | C | -2.303092000 | -2.546044000 | -3.159263000 |
| O                             | -0.117363000 | 3.425871000  | 0.420355000  | C | -1.828550000 | -1.305855000 | -2.400667000 |
| C                             | 0.240904000  | 3.267545000  | 2.807232000  | C | -3.356464000 | 1.417628000  | 0.177366000  |
| H                             | 0.146267000  | 4.352427000  | 2.819037000  | C | -4.456110000 | 2.207447000  | -0.176572000 |
| H                             | -0.408415000 | 2.809435000  | 3.555481000  | C | -4.367212000 | 2.934440000  | -1.365757000 |
| H                             | 1.276530000  | 3.001788000  | 3.038945000  | C | -3.227405000 | 2.888709000  | -2.175767000 |
| O                             | 2.684835000  | 1.420508000  | 0.190930000  | C | -2.178783000 | 2.084329000  | -1.745984000 |
| C                             | 3.796776000  | -1.812087000 | -2.448717000 | C | -3.127693000 | 3.673607000  | -3.454485000 |
| C                             | 3.537400000  | -0.590965000 | -1.827086000 | C | -5.683110000 | 2.272286000  | 0.694244000  |
| C                             | 4.245993000  | -0.222259000 | -0.678082000 | C | -3.290107000 | 0.622442000  | 1.452351000  |
| C                             | 5.214833000  | -1.084945000 | -0.159457000 | C | -3.117762000 | -1.614872000 | 0.425306000  |
| C                             | 5.469295000  | -2.311512000 | -0.776681000 | C | -4.197319000 | -2.358063000 | 1.230194000  |
| C                             | 4.763906000  | -2.674422000 | -1.924477000 | C | -3.670842000 | -2.931383000 | 2.548151000  |
| H                             | 3.248299000  | -2.088824000 | -3.343818000 | C | -3.040881000 | -1.812160000 | 3.382753000  |
| H                             | 2.789442000  | 0.075668000  | -2.244241000 | C | -1.943835000 | -1.109882000 | 2.583373000  |
| H                             | 5.767684000  | -0.800098000 | 0.731286000  | H | 3.530289000  | -3.547454000 | 1.683862000  |
| H                             | 6.216920000  | -2.979498000 | -0.361241000 | H | 1.273840000  | 0.047206000  | 2.361615000  |
| H                             | 4.962833000  | -3.625490000 | -2.407671000 | H | 4.437541000  | -1.204802000 | 3.062562000  |
| C                             | 3.994129000  | 1.104994000  | 0.006086000  | H | 3.426550000  | -2.237686000 | 4.075250000  |
| H                             | 1.284680000  | 1.091936000  | -0.885726000 | H | 3.046326000  | -0.511732000 | 3.913021000  |
| H                             | 4.541774000  | 1.172918000  | 0.960222000  | H | 1.293986000  | -5.030196000 | -0.433766000 |
| C                             | 4.572523000  | 2.302713000  | -0.886558000 | H | 3.041775000  | -4.914921000 | -0.177814000 |
| H                             | 4.000532000  | 2.323402000  | -1.815372000 | H | 2.306550000  | -4.149482000 | -1.587036000 |
| H                             | 5.599040000  | 2.004767000  | -1.111850000 | H | 0.668829000  | -1.702251000 | -2.099468000 |
| C                             | 4.557365000  | 3.657283000  | -0.180594000 | H | 0.056979000  | -3.292080000 | -1.644945000 |
| H                             | 5.202363000  | 3.650729000  | 0.699914000  | H | -1.375896000 | -2.861267000 | 0.588313000  |
| H                             | 4.953703000  | 4.404961000  | -0.878404000 | H | -1.706669000 | -4.395690000 | -1.174687000 |
| C                             | 3.182806000  | 4.111123000  | 0.260443000  | H | -3.210961000 | -4.304758000 | -0.307277000 |
| O                             | 2.280162000  | 4.072284000  | -0.735295000 | H | -3.547828000 | -4.288175000 | -2.803129000 |
| H                             | 1.379356000  | 4.143467000  | -0.347003000 | H | -4.166499000 | -2.805405000 | -2.090570000 |
| O                             | 2.913209000  | 4.478764000  | 1.385721000  | H | -2.803496000 | -2.205137000 | -4.070173000 |
| <sup>5</sup> IM <sub>OH</sub> |              |              |              | H | -1.447678000 | -3.152892000 | -3.475500000 |
| Mn                            | -0.674905000 | 0.236895000  | 0.044616000  | H | -1.111085000 | -0.717242000 | -2.974126000 |
| N                             | 0.768729000  | -1.091533000 | 0.715650000  | H | -2.685440000 | -0.666553000 | -2.188189000 |
| N                             | -1.170792000 | -1.636383000 | -1.095068000 | H | -5.207751000 | 3.553364000  | -1.665883000 |
| N                             | -2.260272000 | 1.367509000  | -0.611112000 | H | -1.247837000 | 1.997209000  | -2.291397000 |
| N                             | -2.423934000 | -0.571432000 | 1.270904000  | H | -3.280582000 | 4.740230000  | -3.264762000 |
| C                             | 0.988384000  | -2.176719000 | -0.056697000 | H | -3.896956000 | 3.352098000  | -4.163542000 |
| C                             | 1.968162000  | -3.116700000 | 0.282418000  | H | -2.151204000 | 3.543284000  | -3.924811000 |
| C                             | 2.747254000  | -2.848042000 | 1.408493000  | H | -6.150394000 | 1.287025000  | 0.793905000  |
| C                             | 2.546440000  | -1.703034000 | 2.187335000  | H | -6.419644000 | 2.952591000  | 0.264072000  |
| C                             | 1.518785000  | -0.847970000 | 1.805478000  | H | -5.439461000 | 2.626695000  | 1.700378000  |
| C                             | 3.406700000  | -1.393557000 | 3.379905000  | H | -2.849858000 | 1.239500000  | 2.241069000  |
| C                             | 2.163537000  | -4.370693000 | -0.527585000 | H | -4.288495000 | 0.335655000  | 1.784731000  |
| C                             | 0.163113000  | -2.261613000 | -1.307659000 | H | -3.620125000 | -1.064437000 | -0.371653000 |
| C                             | -2.035829000 | -2.505229000 | -0.203852000 | H | -5.009288000 | -1.655218000 | 1.442412000  |
| C                             | -2.554769000 | -3.735488000 | -0.968347000 | H | -4.639534000 | -3.130888000 | 0.598610000  |

|                                |              |              |              |   |              |              |              |
|--------------------------------|--------------|--------------|--------------|---|--------------|--------------|--------------|
| H                              | -4.491182000 | -3.402880000 | 3.096222000  | C | 2.388377000  | -1.050954000 | 3.180979000  |
| H                              | -2.927136000 | -3.715362000 | 2.357497000  | C | 1.420967000  | -0.287192000 | 2.536851000  |
| H                              | -2.588687000 | -2.206540000 | 4.297436000  | C | 2.877114000  | -0.686261000 | 4.554286000  |
| H                              | -3.808155000 | -1.093337000 | 3.691806000  | C | 2.936571000  | -3.724746000 | 0.497679000  |
| H                              | -1.506247000 | -0.271377000 | 3.126888000  | C | 0.836125000  | -1.936950000 | -0.702105000 |
| H                              | -1.140892000 | -1.818138000 | 2.375578000  | C | -1.467392000 | -2.370614000 | 0.084933000  |
| O                              | 0.411094000  | 0.807079000  | -1.247390000 | C | -1.727565000 | -3.691794000 | -0.660238000 |
| O                              | -0.310608000 | 1.427991000  | 1.436511000  | C | -2.238002000 | -3.491065000 | -2.089017000 |
| C                              | -0.077138000 | 2.741869000  | 1.430102000  | C | -1.263355000 | -2.605201000 | -2.869909000 |
| O                              | -0.114340000 | 3.425754000  | 0.418825000  | C | -1.060124000 | -1.278921000 | -2.139255000 |
| C                              | 0.246107000  | 3.267160000  | 2.805276000  | C | -3.271729000 | 1.364798000  | 0.024118000  |
| H                              | 0.153241000  | 4.352180000  | 2.816905000  | C | -4.408046000 | 1.971236000  | -0.523621000 |
| H                              | -0.403642000 | 2.810256000  | 3.553902000  | C | -4.266538000 | 2.596928000  | -1.763818000 |
| H                              | 1.281364000  | 2.999680000  | 3.036668000  | C | -3.042940000 | 2.621082000  | -2.441058000 |
| O                              | 2.683001000  | 1.424867000  | 0.186382000  | C | -1.964971000 | 2.001478000  | -1.820191000 |
| C                              | 3.799491000  | -1.812383000 | -2.445843000 | C | -2.886823000 | 3.287230000  | -3.779859000 |
| C                              | 3.538385000  | -0.590858000 | -1.825782000 | C | -5.730843000 | 1.947435000  | 0.195988000  |
| C                              | 4.245196000  | -0.220547000 | -0.676173000 | C | -3.272307000 | 0.674570000  | 1.359012000  |
| C                              | 5.213895000  | -1.082114000 | -0.155381000 | C | -2.718331000 | -1.578966000 | 0.494409000  |
| C                              | 5.469844000  | -2.309247000 | -0.770906000 | C | -3.823667000 | -2.399851000 | 1.180628000  |
| C                              | 4.766333000  | -2.673679000 | -1.919345000 | C | -3.446805000 | -2.848640000 | 2.594358000  |
| H                              | 3.252463000  | -2.090311000 | -3.341467000 | C | -3.070237000 | -1.628867000 | 3.439982000  |
| H                              | 2.790552000  | 0.074889000  | -2.244507000 | C | -1.940198000 | -0.849331000 | 2.766695000  |
| H                              | 5.765467000  | -0.795959000 | 0.735735000  | H | 3.641051000  | -2.784525000 | 2.961199000  |
| H                              | 6.217342000  | -2.976332000 | -0.353796000 | H | 0.989824000  | 0.598153000  | 2.986600000  |
| H                              | 4.966544000  | -3.625064000 | -2.401378000 | H | 3.943209000  | -0.443488000 | 4.527016000  |
| C                              | 3.992279000  | 1.107660000  | 0.005691000  | H | 2.743163000  | -1.525360000 | 5.243312000  |
| H                              | 1.284281000  | 1.090837000  | -0.884622000 | H | 2.337783000  | 0.175722000  | 4.951716000  |
| H                              | 4.537478000  | 1.176753000  | 0.961127000  | H | 2.149825000  | -4.476140000 | 0.371284000  |
| C                              | 4.573167000  | 2.304530000  | -0.887358000 | H | 3.753262000  | -4.182409000 | 1.057540000  |
| H                              | 4.002232000  | 2.324765000  | -1.816830000 | H | 3.306408000  | -3.461893000 | -0.496566000 |
| H                              | 5.599585000  | 2.005138000  | -1.111122000 | H | 1.395341000  | -1.380010000 | -1.455943000 |
| C                              | 4.558765000  | 3.659919000  | -0.182771000 | H | 0.889516000  | -2.990657000 | -0.973870000 |
| H                              | 5.204202000  | 3.654162000  | 0.697412000  | H | -0.900139000 | -2.608300000 | 0.985497000  |
| H                              | 4.954889000  | 4.406673000  | -0.881680000 | H | -0.792309000 | -4.259307000 | -0.687391000 |
| C                              | 3.184518000  | 4.114518000  | 0.258602000  | H | -2.415524000 | -4.296065000 | -0.065975000 |
| O                              | 2.281911000  | 4.077842000  | -0.737258000 | H | -2.347394000 | -4.463401000 | -2.576923000 |
| H                              | 1.381184000  | 4.147107000  | -0.348325000 | H | -3.232460000 | -3.028156000 | -2.080625000 |
| O                              | 2.915442000  | 4.481551000  | 1.384202000  | H | -1.647152000 | -2.376326000 | -3.868311000 |
| <sup>3</sup> TS <sub>2CH</sub> |              |              |              | H | -0.304702000 | -3.116462000 | -3.009901000 |
| Mn                             | -0.468954000 | 0.515463000  | 0.344681000  | H | -0.338040000 | -0.638333000 | -2.644310000 |
| N                              | 0.961842000  | -0.612436000 | 1.314707000  | H | -2.008242000 | -0.744093000 | -2.096919000 |
| N                              | -0.573652000 | -1.455721000 | -0.732725000 | H | -5.132927000 | 3.072440000  | -2.214054000 |
| N                              | -2.087122000 | 1.392413000  | -0.626206000 | H | -0.982163000 | 1.976171000  | -2.272228000 |
| N                              | -2.270525000 | -0.425904000 | 1.368254000  | H | -3.121845000 | 4.353594000  | -3.707798000 |
| C                              | 1.428764000  | -1.697773000 | 0.656358000  | H | -3.573087000 | 2.847698000  | -4.510001000 |
| C                              | 2.413903000  | -2.514401000 | 1.223939000  | H | -1.868198000 | 3.184214000  | -4.158590000 |
| C                              | 2.881038000  | -2.165879000 | 2.493495000  | H | -6.094915000 | 0.922127000  | 0.319844000  |

|                    |              |              |              |   |              |              |              |
|--------------------|--------------|--------------|--------------|---|--------------|--------------|--------------|
| H                  | -6.480232000 | 2.504301000  | -0.368383000 | N | 0.683119000  | 1.769116000  | 0.046712000  |
| H                  | -5.652827000 | 2.394682000  | 1.191359000  | N | -0.293757000 | -0.181733000 | 1.617077000  |
| H                  | -2.991441000 | 1.386557000  | 2.140216000  | N | -2.025452000 | -1.187539000 | -0.872487000 |
| H                  | -4.265704000 | 0.296871000  | 1.602417000  | N | -2.507449000 | 1.188270000  | 0.360721000  |
| H                  | -3.150714000 | -1.125991000 | -0.398558000 | C | 1.419221000  | 1.510260000  | 1.151359000  |
| H                  | -4.727455000 | -1.784261000 | 1.227091000  | C | 2.394968000  | 2.410523000  | 1.588773000  |
| H                  | -4.080627000 | -3.245910000 | 0.540419000  | C | 2.573412000  | 3.575878000  | 0.837261000  |
| H                  | -4.288027000 | -3.382130000 | 3.045167000  | C | 1.809753000  | 3.843408000  | -0.302587000 |
| H                  | -2.606010000 | -3.552927000 | 2.564365000  | C | 0.861322000  | 2.892882000  | -0.665889000 |
| H                  | -2.722308000 | -1.926921000 | 4.433214000  | C | 2.016453000  | 5.080985000  | -1.129491000 |
| H                  | -3.944394000 | -0.985443000 | 3.589275000  | C | 3.211687000  | 2.135902000  | 2.823437000  |
| H                  | -1.676156000 | 0.055195000  | 3.316459000  | C | 1.129822000  | 0.203845000  | 1.832908000  |
| H                  | -1.051135000 | -1.478290000 | 2.721725000  | C | -1.227873000 | 0.719006000  | 2.408267000  |
| O                  | 0.697381000  | 1.342984000  | -0.791364000 | C | -1.174853000 | 0.382531000  | 3.908109000  |
| O                  | -0.459523000 | 1.861724000  | 1.649793000  | C | -1.417922000 | -1.099723000 | 4.199746000  |
| C                  | -0.219509000 | 3.163319000  | 1.467797000  | C | -0.419489000 | -1.951279000 | 3.411893000  |
| O                  | 0.023070000  | 3.647695000  | 0.369291000  | C | -0.510580000 | -1.634133000 | 1.919345000  |
| C                  | -0.261027000 | 3.950608000  | 2.747167000  | C | -3.321693000 | -0.805718000 | -0.819856000 |
| H                  | -0.264081000 | 5.017555000  | 2.526790000  | C | -4.348707000 | -1.724220000 | -1.067114000 |
| H                  | -1.135822000 | 3.675003000  | 3.339507000  | C | -3.978848000 | -3.037708000 | -1.363796000 |
| H                  | 0.632913000  | 3.700336000  | 3.327251000  | C | -2.637917000 | -3.432680000 | -1.416907000 |
| O                  | 2.708603000  | 2.452835000  | -2.651316000 | C | -1.682258000 | -2.455958000 | -1.165558000 |
| C                  | 1.950306000  | -1.375628000 | -4.242073000 | C | -2.234967000 | -4.846411000 | -1.731881000 |
| C                  | 2.074516000  | -0.137718000 | -3.614086000 | C | -5.795906000 | -1.310183000 | -1.015848000 |
| C                  | 3.048257000  | 0.070267000  | -2.623274000 | C | -3.576027000 | 0.645370000  | -0.516537000 |
| C                  | 3.898001000  | -0.990879000 | -2.276775000 | C | -2.620774000 | 0.643155000  | 1.762923000  |
| C                  | 3.775532000  | -2.229758000 | -2.911341000 | C | -3.755314000 | 1.331144000  | 2.541887000  |
| C                  | 2.796828000  | -2.430372000 | -3.886581000 | C | -3.667222000 | 2.858591000  | 2.507599000  |
| H                  | 1.191761000  | -1.519602000 | -5.004899000 | C | -3.629349000 | 3.340536000  | 1.054688000  |
| H                  | 1.423804000  | 0.686354000  | -3.885968000 | C | -2.464147000 | 2.682792000  | 0.314677000  |
| H                  | 4.670068000  | -0.861803000 | -1.527836000 | H | 3.325733000  | 4.292447000  | 1.153227000  |
| H                  | 4.452836000  | -3.035620000 | -2.646882000 | H | 0.230329000  | 3.009594000  | -1.537790000 |
| H                  | 2.698241000  | -3.396664000 | -4.370072000 | H | 2.967300000  | 5.018390000  | -1.668785000 |
| C                  | 3.109154000  | 1.427562000  | -1.940717000 | H | 2.051961000  | 5.971698000  | -0.496361000 |
| H                  | 0.655804000  | 2.317043000  | -0.574474000 | H | 1.218048000  | 5.206625000  | -1.863442000 |
| H                  | 2.069988000  | 1.300704000  | -1.227424000 | H | 2.580816000  | 2.138189000  | 3.718945000  |
| C                  | 4.303789000  | 1.699142000  | -1.001161000 | H | 3.980017000  | 2.899880000  | 2.950500000  |
| H                  | 4.360656000  | 2.782795000  | -0.884099000 | H | 3.703103000  | 1.161255000  | 2.767835000  |
| H                  | 5.209324000  | 1.391249000  | -1.535208000 | H | 1.755180000  | -0.582746000 | 1.405635000  |
| C                  | 4.307391000  | 1.034055000  | 0.385924000  | H | 1.360007000  | 0.253264000  | 2.897108000  |
| H                  | 3.808413000  | 0.058349000  | 0.374889000  | H | -0.840061000 | 1.730408000  | 2.283172000  |
| H                  | 5.328690000  | 0.840535000  | 0.720608000  | H | -0.191402000 | 0.671958000  | 4.291146000  |
| C                  | 3.613338000  | 1.867573000  | 1.436167000  | H | -1.888829000 | 1.022079000  | 4.430622000  |
| O                  | 4.142801000  | 1.686136000  | 2.663682000  | H | -1.313458000 | -1.283497000 | 5.272520000  |
| H                  | 3.651577000  | 2.236905000  | 3.295779000  | H | -2.442420000 | -1.383130000 | 3.928958000  |
| O                  | 2.680404000  | 2.615716000  | 1.236090000  | H | -0.623366000 | -3.019005000 | 3.533732000  |
| <sup>5</sup> TS2CH |              |              |              | H | 0.599061000  | -1.782369000 | 3.775531000  |
| Mn                 | -0.606122000 | 0.273656000  | -0.547532000 | H | 0.225910000  | -2.191012000 | 1.341161000  |

|   |              |              |              |                 |              |              |              |
|---|--------------|--------------|--------------|-----------------|--------------|--------------|--------------|
| H | -1.498903000 | -1.907712000 | 1.552466000  | H               | 5.016397000  | 0.721457000  | -1.899621000 |
| H | -4.756452000 | -3.771265000 | -1.554982000 | C               | 3.136933000  | 0.716146000  | -2.847226000 |
| H | -0.622187000 | -2.672119000 | -1.187346000 | O               | 2.984015000  | 2.056152000  | -2.779076000 |
| H | -2.628160000 | -5.149698000 | -2.706886000 | H               | 2.400392000  | 2.334968000  | -3.503666000 |
| H | -2.639482000 | -5.536110000 | -0.984709000 | O               | 2.599082000  | 0.045033000  | -3.700437000 |
| H | -1.148919000 | -4.955444000 | -1.748840000 | <sup>3</sup> PC |              |              |              |
| H | -6.074036000 | -0.966287000 | -0.014035000 | Mn              | -0.648969000 | 0.326800000  | 0.600849000  |
| H | -6.441058000 | -2.151003000 | -1.274807000 | N               | 0.767937000  | -0.559375000 | 1.760750000  |
| H | -6.002531000 | -0.495020000 | -1.715679000 | N               | -0.460740000 | -1.489984000 | -0.397615000 |
| H | -3.566588000 | 1.218148000  | -1.448248000 | N               | -2.006367000 | 1.178608000  | -0.619571000 |
| H | -4.558579000 | 0.779693000  | -0.062311000 | N               | -2.361985000 | -0.500227000 | 1.407100000  |
| H | -2.892582000 | -0.407146000 | 1.652517000  | C               | 1.427350000  | -1.568981000 | 1.163323000  |
| H | -4.706665000 | 1.015641000  | 2.101343000  | C               | 2.494389000  | -2.223907000 | 1.788586000  |
| H | -3.766039000 | 0.947485000  | 3.563829000  | C               | 2.866607000  | -1.765569000 | 3.054254000  |
| H | -4.526178000 | 3.286517000  | 3.031761000  | C               | 2.195454000  | -0.706020000 | 3.674017000  |
| H | -2.770035000 | 3.204868000  | 3.035901000  | C               | 1.136353000  | -0.130772000 | 2.977680000  |
| H | -3.491779000 | 4.424269000  | 0.999493000  | C               | 2.600322000  | -0.196628000 | 5.029926000  |
| H | -4.577889000 | 3.113978000  | 0.554741000  | C               | 3.202113000  | -3.376615000 | 1.125161000  |
| H | -2.428933000 | 2.966306000  | -0.738223000 | C               | 0.965385000  | -1.888853000 | -0.228865000 |
| H | -1.527006000 | 3.001503000  | 0.772065000  | C               | -1.367490000 | -2.463058000 | 0.337233000  |
| O | 0.802359000  | -0.769877000 | -1.177541000 | C               | -1.468964000 | -3.815520000 | -0.383072000 |
| O | -1.022298000 | 1.123967000  | -2.173354000 | C               | -1.826879000 | -3.687133000 | -1.865723000 |
| C | -0.908733000 | 0.607582000  | -3.400210000 | C               | -0.826122000 | -2.759432000 | -2.559776000 |
| O | -0.442453000 | -0.502942000 | -3.611033000 | C               | -0.797183000 | -1.403174000 | -1.860270000 |
| C | -1.402609000 | 1.539790000  | -4.473878000 | C               | -3.258336000 | 1.191744000  | -0.122530000 |
| H | -1.331396000 | 1.055385000  | -5.446883000 | C               | -4.309659000 | 1.811313000  | -0.808501000 |
| H | -2.436105000 | 1.829936000  | -4.268335000 | C               | -4.004654000 | 2.413081000  | -2.030918000 |
| H | -0.795331000 | 2.449688000  | -4.464753000 | C               | -2.706143000 | 2.399787000  | -2.553626000 |
| O | 2.841643000  | -3.280298000 | -1.689209000 | C               | -1.728186000 | 1.765316000  | -1.796499000 |
| C | 2.668039000  | -3.354766000 | 2.518183000  | C               | -2.373650000 | 3.026539000  | -3.880054000 |
| C | 2.584058000  | -3.234548000 | 1.132604000  | C               | -5.705768000 | 1.829820000  | -0.245531000 |
| C | 3.361528000  | -2.288031000 | 0.447689000  | C               | -3.419491000 | 0.536289000  | 1.219976000  |
| C | 4.224356000  | -1.460995000 | 1.181670000  | C               | -2.690841000 | -1.727546000 | 0.576306000  |
| C | 4.307855000  | -1.582991000 | 2.570965000  | C               | -3.825392000 | -2.560773000 | 1.191337000  |
| C | 3.525796000  | -2.522597000 | 3.244366000  | C               | -3.601692000 | -2.895397000 | 2.667570000  |
| H | 2.062501000  | -4.094015000 | 3.032452000  | C               | -3.372739000 | -1.602993000 | 3.455513000  |
| H | 1.922843000  | -3.879694000 | 0.563913000  | C               | -2.196569000 | -0.830801000 | 2.863181000  |
| H | 4.845595000  | -0.726522000 | 0.683677000  | H               | 3.695677000  | -2.245429000 | 3.566078000  |
| H | 4.991902000  | -0.947276000 | 3.124177000  | H               | 0.564479000  | 0.694370000  | 3.383086000  |
| H | 3.587527000  | -2.611041000 | 4.324047000  | H               | 3.621074000  | 0.198203000  | 5.002781000  |
| C | 3.207769000  | -2.170611000 | -1.064272000 | H               | 2.580825000  | -1.002826000 | 5.769503000  |
| H | 0.640612000  | -0.868258000 | -2.149624000 | H               | 1.934834000  | 0.599292000  | 5.370237000  |
| H | 2.180781000  | -1.551748000 | -1.125374000 | H               | 2.523107000  | -4.225435000 | 0.989792000  |
| C | 4.260512000  | -1.313674000 | -1.809667000 | H               | 4.043958000  | -3.710561000 | 1.733542000  |
| H | 4.252623000  | -1.644650000 | -2.849213000 | H               | 3.586166000  | -3.108432000 | 0.136303000  |
| H | 5.243930000  | -1.561412000 | -1.398435000 | H               | 1.550716000  | -1.325361000 | -0.961849000 |
| C | 4.059744000  | 0.204826000  | -1.764752000 | H               | 1.104873000  | -2.944900000 | -0.460470000 |
| H | 3.673905000  | 0.556986000  | -0.803406000 | H               | -0.890017000 | -2.638795000 | 1.302120000  |

|   |              |              |              |                 |              |              |              |
|---|--------------|--------------|--------------|-----------------|--------------|--------------|--------------|
| H | -0.507353000 | -4.329996000 | -0.287619000 | H               | 0.621925000  | 2.169609000  | -0.254012000 |
| H | -2.186275000 | -4.441124000 | 0.152191000  | H               | 1.747250000  | 1.080577000  | -0.030588000 |
| H | -1.822709000 | -4.676365000 | -2.331490000 | C               | 5.176596000  | 0.690036000  | -1.542898000 |
| H | -2.841433000 | -3.286380000 | -1.982401000 | H               | 5.893856000  | 1.474507000  | -1.293759000 |
| H | -1.105391000 | -2.586868000 | -3.603078000 | H               | 5.645800000  | 0.024367000  | -2.270882000 |
| H | 0.171140000  | -3.212165000 | -2.573635000 | C               | 4.858737000  | -0.144760000 | -0.275909000 |
| H | -0.072848000 | -0.724509000 | -2.309275000 | H               | 4.108675000  | -0.904200000 | -0.500556000 |
| H | -1.779135000 | -0.941205000 | -1.948399000 | H               | 5.767038000  | -0.647143000 | 0.057821000  |
| H | -4.797816000 | 2.902933000  | -2.588341000 | C               | 4.320926000  | 0.718378000  | 0.835926000  |
| H | -0.700126000 | 1.706553000  | -2.130340000 | O               | 5.226136000  | 0.996855000  | 1.775828000  |
| H | -2.895192000 | 3.979238000  | -4.003011000 | H               | 4.823741000  | 1.577285000  | 2.444900000  |
| H | -2.683326000 | 2.372095000  | -4.702183000 | O               | 3.182423000  | 1.155836000  | 0.890829000  |
| H | -1.300413000 | 3.205016000  | -3.976961000 | <sup>5</sup> PC |              |              |              |
| H | -6.098042000 | 0.813934000  | -0.128232000 | Mn              | -0.893069000 | 0.130713000  | -0.554366000 |
| H | -6.378896000 | 2.377012000  | -0.907432000 | N               | 0.347856000  | 1.708199000  | -0.161757000 |
| H | -5.732308000 | 2.308275000  | 0.738508000  | N               | -0.730573000 | -0.048014000 | 1.535711000  |
| H | -3.295049000 | 1.283092000  | 2.008423000  | N               | -2.167346000 | -1.465159000 | -0.867450000 |
| H | -4.414870000 | 0.105099000  | 1.330824000  | N               | -2.889844000 | 1.022913000  | -0.026854000 |
| H | -3.050832000 | -1.345990000 | -0.380405000 | C               | 0.999802000  | 1.619534000  | 1.015639000  |
| H | -4.758183000 | -1.996645000 | 1.089656000  | C               | 1.941023000  | 2.579353000  | 1.401806000  |
| H | -3.963164000 | -3.461240000 | 0.589111000  | C               | 2.179654000  | 3.629169000  | 0.511638000  |
| H | -4.468496000 | -3.436976000 | 3.056239000  | C               | 1.497151000  | 3.732182000  | -0.705344000 |
| H | -2.735254000 | -3.558191000 | 2.785727000  | C               | 0.572448000  | 2.736307000  | -0.997093000 |
| H | -3.138774000 | -1.814560000 | 4.503089000  | C               | 1.761286000  | 4.851580000  | -1.672333000 |
| H | -4.280850000 | -0.989643000 | 3.451670000  | C               | 2.656984000  | 2.487601000  | 2.723297000  |
| H | -2.019790000 | 0.114509000  | 3.377366000  | C               | 0.657196000  | 0.417957000  | 1.842368000  |
| H | -1.292547000 | -1.431461000 | 2.960145000  | C               | -1.759820000 | 0.902723000  | 2.143103000  |
| O | 0.840553000  | 1.198283000  | -0.402110000 | C               | -1.808484000 | 0.770604000  | 3.672391000  |
| O | -0.817235000 | 1.797750000  | 1.801639000  | C               | -2.025096000 | -0.669952000 | 4.140419000  |
| C | -0.563330000 | 3.056375000  | 1.550292000  | C               | -0.937862000 | -1.571155000 | 3.549741000  |
| O | -0.006144000 | 3.450340000  | 0.514776000  | C               | -0.919335000 | -1.458380000 | 2.026117000  |
| C | -1.013253000 | 4.009155000  | 2.626850000  | C               | -3.471747000 | -1.156921000 | -1.005338000 |
| H | -0.666083000 | 5.019275000  | 2.413009000  | C               | -4.423150000 | -2.150686000 | -1.275336000 |
| H | -2.106553000 | 3.998707000  | 2.677211000  | C               | -3.964388000 | -3.462729000 | -1.398331000 |
| H | -0.637323000 | 3.675552000  | 3.597355000  | C               | -2.608540000 | -3.782790000 | -1.265370000 |
| O | 3.754420000  | 2.557344000  | -1.924187000 | C               | -1.736928000 | -2.733322000 | -1.001827000 |
| C | 1.055038000  | 0.566120000  | -4.432474000 | C               | -2.107538000 | -5.194598000 | -1.397301000 |
| C | 1.928577000  | 1.248882000  | -3.592896000 | C               | -5.882929000 | -1.814975000 | -1.432997000 |
| C | 3.018904000  | 0.583244000  | -3.005268000 | C               | -3.839677000 | 0.301987000  | -0.897919000 |
| C | 3.202860000  | -0.785443000 | -3.261103000 | C               | -3.100566000 | 0.676626000  | 1.418639000  |
| C | 2.317527000  | -1.472485000 | -4.092456000 | C               | -4.310905000 | 1.410132000  | 2.019359000  |
| C | 1.250067000  | -0.796759000 | -4.685997000 | C               | -4.273036000 | 2.921735000  | 1.777978000  |
| H | 0.224542000  | 1.089609000  | -4.894488000 | C               | -4.143096000 | 3.199654000  | 0.276871000  |
| H | 1.790679000  | 2.304314000  | -3.388285000 | C               | -2.907291000 | 2.494834000  | -0.280039000 |
| H | 4.037780000  | -1.324187000 | -2.828547000 | H               | 2.909125000  | 4.388307000  | 0.778040000  |
| H | 2.468183000  | -2.529569000 | -4.283304000 | H               | -0.009273000 | 2.752934000  | -1.908287000 |
| H | 0.569368000  | -1.328740000 | -5.342600000 | H               | 2.755316000  | 4.738493000  | -2.117241000 |
| C | 3.953780000  | 1.370274000  | -2.147697000 | H               | 1.734453000  | 5.819528000  | -1.164416000 |



|   |              |              |              |   |              |              |              |
|---|--------------|--------------|--------------|---|--------------|--------------|--------------|
| H | 1.027008000  | 4.861382000  | -2.480226000 | O | 0.862747000  | -1.197194000 | -0.935364000 |
| H | 1.955778000  | 2.601124000  | 3.556994000  | O | -1.124704000 | 0.637270000  | -2.381889000 |
| H | 3.408970000  | 3.273523000  | 2.805907000  | C | -0.317642000 | 0.546318000  | -3.402753000 |
| H | 3.157654000  | 1.523474000  | 2.843196000  | O | 0.832674000  | 0.088414000  | -3.318420000 |
| H | 1.345640000  | -0.398423000 | 1.614390000  | C | -0.891730000 | 1.046736000  | -4.701258000 |
| H | 0.766740000  | 0.626766000  | 2.906015000  | H | -0.129150000 | 1.047338000  | -5.478854000 |
| H | -1.402490000 | 1.905623000  | 1.905824000  | H | -1.719353000 | 0.393963000  | -4.995544000 |
| H | -0.871117000 | 1.152122000  | 4.089381000  | H | -1.300055000 | 2.051360000  | -4.565494000 |
| H | -2.584516000 | 1.438765000  | 4.050137000  | O | 5.863621000  | -2.493932000 | -0.903387000 |
| H | -2.001939000 | -0.710274000 | 5.232688000  | C | 2.563409000  | -3.167390000 | 1.641886000  |
| H | -3.013828000 | -1.030056000 | 3.831135000  | C | 3.461845000  | -2.850309000 | 0.623636000  |
| H | -1.113099000 | -2.621823000 | 3.798753000  | C | 4.376771000  | -1.797950000 | 0.788890000  |
| H | 0.037974000  | -1.305970000 | 3.969412000  | C | 4.375990000  | -1.063270000 | 1.981751000  |
| H | -0.122920000 | -2.058363000 | 1.584700000  | C | 3.501571000  | -1.407246000 | 3.015610000  |
| H | -1.863618000 | -1.824159000 | 1.627708000  | C | 2.596799000  | -2.457391000 | 2.848093000  |
| H | -4.680510000 | -4.253476000 | -1.602930000 | H | 1.856886000  | -3.980114000 | 1.506981000  |
| H | -0.671186000 | -2.886510000 | -0.895151000 | H | 3.476265000  | -3.418053000 | -0.300577000 |
| H | -2.369331000 | -5.607738000 | -2.376172000 | H | 5.083524000  | -0.253581000 | 2.126554000  |
| H | -2.562924000 | -5.837631000 | -0.637638000 | H | 3.529940000  | -0.859235000 | 3.951680000  |
| H | -1.022852000 | -5.243312000 | -1.282220000 | H | 1.923549000  | -2.727901000 | 3.654331000  |
| H | -6.289736000 | -1.370157000 | -0.518677000 | C | 5.389059000  | -1.551284000 | -0.288674000 |
| H | -6.458702000 | -2.714861000 | -1.654937000 | H | 1.165626000  | -0.914505000 | -1.828240000 |
| H | -6.042878000 | -1.100277000 | -2.246270000 | H | 1.634742000  | -1.548268000 | -0.468590000 |
| H | -3.786798000 | 0.749925000  | -1.895181000 | C | 5.854319000  | -0.128127000 | -0.562515000 |
| H | -4.869754000 | 0.407804000  | -0.551279000 | H | 6.531876000  | -0.176140000 | -1.417536000 |
| H | -3.325683000 | -0.391203000 | 1.442607000  | H | 6.440608000  | 0.217175000  | 0.297085000  |
| H | -5.214054000 | 0.998734000  | 1.555871000  | C | 4.731361000  | 0.886284000  | -0.823065000 |
| H | -4.392269000 | 1.170708000  | 3.081617000  | H | 4.147277000  | 1.069564000  | 0.086405000  |
| H | -5.181274000 | 3.381006000  | 2.178326000  | H | 5.144540000  | 1.851139000  | -1.123748000 |
| H | -3.428345000 | 3.375758000  | 2.312027000  | C | 3.742318000  | 0.402753000  | -1.855606000 |
| H | -4.045848000 | 4.271692000  | 0.080605000  | O | 3.116449000  | 1.388399000  | -2.505246000 |
| H | -5.043960000 | 2.859771000  | -0.247388000 | H | 2.384134000  | 0.991813000  | -3.031406000 |
| H | -2.804856000 | 2.632337000  | -1.358180000 | O | 3.489756000  | -0.774372000 | -2.045823000 |
| H | -2.015653000 | 2.922709000  | 0.183723000  |   |              |              |              |
